# Supplementary material
Source: publisher figshare collection journal article supplement (https://acs.figshare.com/ndownloader/files/4713850)
Supplement: Supplementary file 1 [file 4713850]

#=========================================================================END 
data_ds1 
 
_audit_creation_method            SHELXL-97 
_chemical_name_systematic 
; 
 ? 
; 
_chemical_name_common             ? 
_chemical_melting_point           ? 
_chemical_formula_moiety          ? 
_chemical_formula_sum 
 'C246 H267 Dy30 I N50 O180' 
_chemical_formula_weight          11806.00 
 
loop_ 
 _atom_type_symbol 
 _atom_type_description 
 _atom_type_scat_dispersion_real 
 _atom_type_scat_dispersion_imag 
 _atom_type_scat_source 
 'C'  'C'   0.0033   0.0016 
 'International Tables Vol C Tables 4.2.6.8 and 6.1.1.4' 
 'H'  'H'   0.0000   0.0000 
 'International Tables Vol C Tables 4.2.6.8 and 6.1.1.4' 
 'N'  'N'   0.0061   0.0033 
 'International Tables Vol C Tables 4.2.6.8 and 6.1.1.4' 
 'O'  'O'   0.0106   0.0060 
 'International Tables Vol C Tables 4.2.6.8 and 6.1.1.4' 
 'Dy'  'Dy'  -0.1892   4.4098 
 'International Tables Vol C Tables 4.2.6.8 and 6.1.1.4' 
 'I'  'I'  -0.4742   1.8119 
 'International Tables Vol C Tables 4.2.6.8 and 6.1.1.4' 
 
_symmetry_cell_setting            Monoclinic 
_symmetry_space_group_name_H-M    P21/c 
 
loop_ 
 _symmetry_equiv_pos_as_xyz 
 'x, y, z' 
 '-x, y+1/2, -z+1/2' 
 '-x, -y, -z' 
 'x, -y-1/2, z-1/2' 
 
_cell_length_a                    23.000(6) 
_cell_length_b                    24.256(6) 
_cell_length_c                    63.560(16) 
_cell_angle_alpha                 90.00 
_cell_angle_beta                  95.462(5) 
_cell_angle_gamma                 90.00 
_cell_volume                      35299(16) 
_cell_formula_units_Z             4 
_cell_measurement_temperature     273(2) 
_cell_measurement_reflns_used     ? 
_cell_measurement_theta_min       ? 
_cell_measurement_theta_max       ? 
 
_exptl_crystal_description        ? 
_exptl_crystal_colour             ? 
_exptl_crystal_size_max           ? 
_exptl_crystal_size_mid           ? 
_exptl_crystal_size_min           ? 
_exptl_crystal_density_meas       ? 
_exptl_crystal_density_diffrn     2.222 
_exptl_crystal_density_method     'not measured' 
_exptl_crystal_F_000              22264 
_exptl_absorpt_coefficient_mu     6.454 
_exptl_absorpt_correction_type    ? 
_exptl_absorpt_correction_T_min   ? 
_exptl_absorpt_correction_T_max   ? 
_exptl_absorpt_process_details    ? 
 
_exptl_special_details 
; 
 ? 
; 
 
_diffrn_ambient_temperature       273(2) 
_diffrn_radiation_wavelength      0.71073 
_diffrn_radiation_type            MoK\a 
_diffrn_radiation_source          'fine-focus sealed tube' 
_diffrn_radiation_monochromator   graphite 
_diffrn_measurement_device_type   ? 
_diffrn_measurement_method        ? 
_diffrn_detector_area_resol_mean  ? 
_diffrn_standards_number          ? 
_diffrn_standards_interval_count  ? 
_diffrn_standards_interval_time   ? 
_diffrn_standards_decay_%         ? 
_diffrn_reflns_number             204054 
_diffrn_reflns_av_R_equivalents   0.1464 
_diffrn_reflns_av_sigmaI/netI     0.0889 
_diffrn_reflns_limit_h_min        -21 
_diffrn_reflns_limit_h_max        21 
_diffrn_reflns_limit_k_min        -23 
_diffrn_reflns_limit_k_max        23 
_diffrn_reflns_limit_l_min        -60 
_diffrn_reflns_limit_l_max        60 
_diffrn_reflns_theta_min          1.71 
_diffrn_reflns_theta_max          19.82 
_reflns_number_total              32021 
_reflns_number_gt                 21777 
_reflns_threshold_expression      >2sigma(I) 
 
_computing_data_collection        ? 
_computing_cell_refinement        ? 
_computing_data_reduction         ? 
_computing_structure_solution     'SHELXS-97 (Sheldrick, 1990)' 
_computing_structure_refinement   'SHELXL-97 (Sheldrick, 1997)' 
_computing_molecular_graphics     ? 
_computing_publication_material   ? 
 
_refine_special_details 
; 
 Refinement of F^2^ against ALL reflections.  The weighted R-factor wR and 
 goodness of fit S are based on F^2^, conventional R-factors R are based 
 on F, with F set to zero for negative F^2^. The threshold expression of 
 F^2^ > 2sigma(F^2^) is used only for calculating R-factors(gt) etc. and is 
 not relevant to the choice of reflections for refinement.  R-factors based 
 on F^2^ are statistically about twice as large as those based on F, and R- 
 factors based on ALL data will be even larger. 
; 
 
_refine_ls_structure_factor_coef  Fsqd  
_refine_ls_matrix_type            fullcycle 
_refine_ls_weighting_scheme       calc  
_refine_ls_weighting_details 
 'calc w=1/[\s^2^(Fo^2^)+(0.0563P)^2^+480.9927P] where P=(Fo^2^+2Fc^2^)/3' 
_atom_sites_solution_primary      direct 
_atom_sites_solution_secondary    difmap 
_atom_sites_solution_hydrogens    geom 
_refine_ls_hydrogen_treatment     mixed 
_refine_ls_extinction_method      none 
_refine_ls_extinction_coef        ? 
_refine_ls_number_reflns          32021 
_refine_ls_number_parameters      4564 
_refine_ls_number_restraints      0 
_refine_ls_R_factor_all           0.0899 
_refine_ls_R_factor_gt            0.0504 
_refine_ls_wR_factor_ref          0.1320 
_refine_ls_wR_factor_gt           0.1117 
_refine_ls_goodness_of_fit_ref    1.012 
_refine_ls_restrained_S_all       1.012 
_refine_ls_shift/su_max           0.001 
_refine_ls_shift/su_mean          0.000 
 
loop_ 
 _atom_site_label 
 _atom_site_type_symbol 
 _atom_site_fract_x 
 _atom_site_fract_y 
 _atom_site_fract_z 
 _atom_site_U_iso_or_equiv 
 _atom_site_adp_type 
 _atom_site_occupancy 
 _atom_site_symmetry_multiplicity 
 _atom_site_calc_flag 
 _atom_site_refinement_flags 
 _atom_site_disorder_assembly 
 _atom_site_disorder_group 
Dy1 Dy -0.87453(4) 0.42890(4) 0.303753(16) 0.0236(3) Uani 1 1 d . . . 
Dy10 Dy -0.60737(4) 0.37073(4) 0.328717(17) 0.0237(3) Uani 1 1 d . . . 
Dy3 Dy -0.91566(4) 0.58114(4) 0.310651(16) 0.0235(3) Uani 1 1 d . . . 
Dy5 Dy -0.71657(4) 0.75185(4) 0.342096(17) 0.0258(3) Uani 1 1 d . . . 
Dy17 Dy -0.71521(5) 0.43207(4) 0.423619(17) 0.0274(3) Uani 1 1 d . . . 
Dy18 Dy -0.75812(5) 0.58284(4) 0.430429(17) 0.0280(3) Uani 1 1 d . . . 
Dy2 Dy -0.96312(5) 0.50936(4) 0.259922(17) 0.0288(3) Uani 1 1 d . . . 
Dy4 Dy -0.79986(4) 0.54021(4) 0.275832(16) 0.0242(3) Uani 1 1 d . . . 
Dy15 Dy -0.57870(4) 0.66315(4) 0.332120(17) 0.0246(3) Uani 1 1 d . . . 
Dy12 Dy -0.66163(5) 0.33579(4) 0.381233(17) 0.0266(3) Uani 1 1 d . . . 
Dy8 Dy -0.82900(5) 0.84190(4) 0.371032(18) 0.0313(3) Uani 1 1 d . . . 
Dy14 Dy -0.51836(4) 0.58174(4) 0.379038(17) 0.0250(3) Uani 1 1 d . . . 
Dy7 Dy -0.86753(4) 0.70360(4) 0.346764(17) 0.0265(3) Uani 1 1 d . . . 
Dy19 Dy -0.86777(5) 0.47871(4) 0.409925(17) 0.0285(3) Uani 1 1 d . . . 
Dy25 Dy -0.70593(5) 0.68666(4) 0.286771(17) 0.0281(3) Uani 1 1 d . . . 
Dy22 Dy -0.96141(4) 0.58372(5) 0.367993(17) 0.0293(3) Uani 1 1 d . . . 
Dy11 Dy -0.63450(5) 0.22344(4) 0.341779(18) 0.0310(3) Uani 1 1 d . . . 
Dy24 Dy -0.61401(5) 0.66098(4) 0.420420(17) 0.0277(3) Uani 1 1 d . . . 
Dy6 Dy -0.76392(5) 0.71483(4) 0.396035(17) 0.0265(3) Uani 1 1 d . . . 
Dy16 Dy -0.41992(5) 0.62188(4) 0.334807(19) 0.0324(3) Uani 1 1 d . . . 
Dy9 Dy -0.76378(4) 0.32474(4) 0.331829(16) 0.0237(3) Uani 1 1 d . . . 
Dy26 Dy -0.64175(5) 0.46230(4) 0.278741(17) 0.0281(3) Uani 1 1 d . . . 
Dy29 Dy -0.84002(5) 0.97977(5) 0.569125(18) 0.0326(3) Uani 1 1 d . . . 
Dy13 Dy -0.53424(4) 0.51287(4) 0.326358(17) 0.0246(3) Uani 1 1 d . . . 
Dy21 Dy -0.90284(4) 0.37109(4) 0.358770(17) 0.0282(3) Uani 1 1 d . . . 
Dy23 Dy -0.55215(5) 0.43675(4) 0.412591(17) 0.0283(3) Uani 1 1 d . . . 
Dy27 Dy -0.76575(5) 0.91186(5) 0.525320(18) 0.0335(3) Uani 1 1 d . . . 
Dy28 Dy -0.75514(5) 0.84396(5) 0.579324(18) 0.0350(3) Uani 1 1 d . . . 
Dy20 Dy -0.79992(5) 0.47605(5) 0.468968(17) 0.0332(3) Uani 1 1 d . . . 
Dy30 Dy -0.67639(5) 0.97960(5) 0.570135(19) 0.0390(3) Uani 1 1 d . . . 
I1 I 0.27104(11) 0.53336(11) 0.35427(4) 0.1098(9) Uani 1 1 d . . . 
O159 O -0.8344(5) 0.5199(5) 0.30802(19) 0.016(3) Uani 1 1 d . . . 
O158 O -0.6885(5) 0.3783(5) 0.3487(2) 0.020(3) Uani 1 1 d . . . 
O157 O -0.7128(5) 0.6710(5) 0.4268(2) 0.024(4) Uani 1 1 d . . . 
O156 O -0.5679(5) 0.4335(5) 0.3052(2) 0.028(4) Uani 1 1 d . . . 
O155 O -0.6399(6) 0.4875(5) 0.4111(2) 0.026(4) Uani 1 1 d . . . 
O154 O -0.5880(5) 0.4547(5) 0.34733(19) 0.025(4) Uani 1 1 d . . . 
O153 O -0.5129(5) 0.6052(5) 0.3166(2) 0.028(4) Uani 1 1 d . . . 
O152 O -0.6736(5) 0.2976(5) 0.32009(19) 0.019(3) Uani 1 1 d . . . 
O151 O -0.7102(6) 0.2694(5) 0.3580(2) 0.031(4) Uani 1 1 d . . . 
O150 O -0.6501(6) 0.7232(5) 0.3165(2) 0.026(4) Uani 1 1 d . . . 
O149 O -0.5815(5) 0.5752(5) 0.34856(19) 0.019(3) Uani 1 1 d . . . 
O148 O -0.6339(5) 0.3772(5) 0.41437(19) 0.020(3) Uani 1 1 d . . . 
O147 O -0.7717(5) 0.5034(5) 0.40714(19) 0.025(4) Uani 1 1 d . . . 
O146 O -0.7376(6) 0.7863(5) 0.4197(2) 0.039(4) Uani 1 1 d . . . 
O145 O -0.9449(6) 0.6393(5) 0.3377(2) 0.029(4) Uani 1 1 d . . . 
O144 O -0.8138(5) 0.7840(5) 0.3408(2) 0.024(4) Uani 1 1 d . . . 
O143 O -0.5322(6) 0.7222(6) 0.3095(2) 0.039(4) Uani 1 1 d . . . 
O142 O -0.8325(5) 0.6329(5) 0.3238(2) 0.024(4) Uani 1 1 d . . . 
O141 O -0.9491(5) 0.4938(5) 0.2988(2) 0.024(4) Uani 1 1 d . . . 
O140 O -0.7814(6) 0.6197(5) 0.2956(2) 0.026(4) Uani 1 1 d . . . 
O139 O -0.5431(6) 0.4854(5) 0.3789(2) 0.028(4) Uani 1 1 d . . . 
O138 O -0.8090(6) 0.4268(5) 0.4349(2) 0.029(4) Uani 1 1 d . . . 
O137 O -0.7441(5) 0.4618(5) 0.2876(2) 0.023(4) Uani 1 1 d . . . 
O136 O -0.7010(6) 0.8904(6) 0.5559(2) 0.033(4) Uani 1 1 d . . . 
O135 O -0.7716(5) 0.6887(5) 0.3598(2) 0.025(4) Uani 1 1 d . . . 
O134 O -0.8506(5) 0.7515(5) 0.3793(2) 0.027(4) Uani 1 1 d . . . 
O133 O -0.8673(6) 0.3483(5) 0.3259(2) 0.025(4) Uani 1 1 d . . . 
O132 O -0.6655(6) 0.5761(5) 0.4180(2) 0.029(4) Uani 1 1 d . . . 
O131 O -0.7624(6) 0.9892(5) 0.5475(2) 0.034(4) Uani 1 1 d . . . 
O130 O -0.8378(6) 0.5320(6) 0.4403(2) 0.032(4) Uani 1 1 d . . . 
O129 O -0.5546(7) 0.4709(6) 0.4455(2) 0.053(5) Uani 1 1 d . . . 
O128 O -0.7466(7) 0.3387(6) 0.4278(2) 0.042(4) Uani 1 1 d . . . 
O127 O -0.9578(6) 0.3734(6) 0.2922(2) 0.041(4) Uani 1 1 d . . . 
O126 O -0.6510(5) 0.6780(5) 0.3556(2) 0.025(4) Uani 1 1 d . . . 
O125 O -0.6898(6) 0.5606(6) 0.2815(2) 0.035(4) Uani 1 1 d . . . 
O124 O -0.5956(5) 0.3044(5) 0.3566(2) 0.025(4) Uani 1 1 d . . . 
O123 O -0.6186(6) 0.5290(5) 0.3043(2) 0.038(4) Uani 1 1 d . . . 
O122 O -0.4643(5) 0.5481(5) 0.3523(2) 0.023(4) Uani 1 1 d . . . 
O121 O -0.8708(6) 0.4697(5) 0.2700(2) 0.025(4) Uani 1 1 d . . . 
O120 O -0.7370(6) 0.7903(5) 0.3749(2) 0.029(4) Uani 1 1 d . . . 
O119 O -0.9305(6) 0.4624(5) 0.2296(2) 0.033(4) Uani 1 1 d . . . 
O118 O -0.7212(6) 0.5031(6) 0.4482(2) 0.031(4) Uani 1 1 d . . . 
O117 O -0.8966(5) 0.5764(5) 0.2751(2) 0.026(4) Uani 1 1 d . . . 
O116 O -0.8202(6) 0.8915(5) 0.5549(2) 0.029(4) Uani 1 1 d . . . 
O115 O -0.4936(5) 0.6525(5) 0.3552(2) 0.028(4) Uani 1 1 d . . . 
O114 O -0.7372(5) 0.4000(5) 0.3881(2) 0.026(4) Uani 1 1 d . . . 
O113 O -0.5942(6) 0.6217(6) 0.4539(2) 0.038(4) Uani 1 1 d . . . 
O112 O -0.8781(6) 0.5674(6) 0.3950(2) 0.031(4) Uani 1 1 d . . . 
O111 O -0.7585(5) 0.6895(5) 0.3174(2) 0.024(4) Uani 1 1 d . . . 
O110 O -0.9082(6) 0.5377(5) 0.3437(2) 0.033(4) Uani 1 1 d . . . 
O109 O -0.8705(6) 0.6331(6) 0.3714(2) 0.033(4) Uani 1 1 d . . . 
O108 O -0.8739(6) 0.4502(5) 0.3406(2) 0.025(4) Uani 1 1 d . . . 
O107 O -0.5089(6) 0.3644(5) 0.3432(2) 0.039(4) Uani 1 1 d . . . 
O106 O -0.4782(6) 0.5045(6) 0.2969(2) 0.047(5) Uani 1 1 d . . . 
O105 O -0.7989(6) 0.3595(6) 0.3625(2) 0.029(4) Uani 1 1 d . . . 
O104 O -0.5883(6) 0.6502(5) 0.3841(2) 0.029(4) Uani 1 1 d . . . 
O103 O -0.8879(6) 0.7307(6) 0.3099(2) 0.034(4) Uani 1 1 d . . . 
O102 O -0.8477(6) 1.0693(6) 0.5510(3) 0.050(5) Uani 1 1 d . . . 
O101 O -0.6783(5) 0.4209(6) 0.3087(2) 0.035(4) Uani 1 1 d . . . 
O100 O -0.9134(6) 0.4767(6) 0.3699(2) 0.036(4) Uani 1 1 d . . . 
O99 O -0.8408(6) 0.3641(6) 0.2796(2) 0.038(4) Uani 1 1 d . . . 
O98 O -0.8348(6) 0.4044(6) 0.3885(2) 0.035(4) Uani 1 1 d . . . 
O97 O -0.6775(6) 0.6753(6) 0.3896(2) 0.032(4) Uani 1 1 d . . . 
O96 O -0.8837(6) 0.9231(6) 0.3830(3) 0.049(5) Uani 1 1 d . . . 
O95 O -0.6702(7) 0.7819(7) 0.5697(3) 0.057(5) Uani 1 1 d . . . 
O94 O -0.7823(6) 0.3006(6) 0.2956(2) 0.034(4) Uani 1 1 d . . . 
O93 O -0.3366(7) 0.6469(7) 0.3174(3) 0.064(5) Uani 1 1 d . . . 
O92 O -0.7565(6) 0.9394(6) 0.5870(2) 0.034(4) Uani 1 1 d . . . 
O91 O -0.6322(6) 0.8036(6) 0.3525(2) 0.039(4) Uani 1 1 d . . . 
O90 O -0.7312(7) 0.6136(6) 0.4648(2) 0.046(5) Uani 1 1 d . . . 
O89 O -0.8843(7) 0.2789(6) 0.3707(3) 0.056(5) Uani 1 1 d . . . 
O88 O -0.8135(6) 0.2393(6) 0.3321(3) 0.048(5) Uani 1 1 d . . . 
O87 O -0.6245(7) 0.1911(6) 0.3768(2) 0.052(5) Uani 1 1 d . . . 
O86 O -0.6297(7) 0.9699(6) 0.5394(3) 0.053(5) Uani 1 1 d . . . 
O85 O -0.5982(6) 0.4124(5) 0.3788(2) 0.032(4) Uani 1 1 d . . . 
O84 O -0.8358(6) 0.7180(6) 0.4203(2) 0.037(4) Uani 1 1 d . . . 
O83 O -0.5813(7) 1.0187(7) 0.5796(3) 0.067(6) Uani 1 1 d . . . 
O82 O -0.9438(6) 0.6667(5) 0.2928(2) 0.038(4) Uani 1 1 d . . . 
O81 O -0.6473(6) 0.6187(5) 0.3058(2) 0.036(4) Uani 1 1 d . . . 
O80 O -0.7755(7) 0.4967(6) 0.2449(2) 0.046(5) Uani 1 1 d . . . 
O79 O -0.7499(7) 0.5490(6) 0.4880(2) 0.047(5) Uani 1 1 d . . . 
O78 O -0.7320(7) 0.4075(6) 0.4776(2) 0.057(5) Uani 1 1 d . . . 
O77 O -0.8367(7) 0.8471(6) 0.5986(3) 0.056(5) Uani 1 1 d . . . 
O76 O -0.9116(6) 0.9656(7) 0.5405(2) 0.050(5) Uani 1 1 d . . . 
O75 O -0.6819(6) 0.4743(7) 0.2449(2) 0.046(5) Uani 1 1 d . . . 
O74 O -0.5543(6) 0.7476(6) 0.3509(2) 0.040(4) Uani 1 1 d . . . 
O73 O -0.9515(6) 0.5182(7) 0.4221(3) 0.056(5) Uani 1 1 d . . . 
O72 O -0.9382(7) 0.4101(7) 0.4130(3) 0.065(6) Uani 1 1 d . . . 
O71 O -0.5151(7) 0.6748(7) 0.4266(2) 0.052(5) Uani 1 1 d . . . 
O70 O -0.8005(6) 0.7297(6) 0.2783(2) 0.050(5) Uani 1 1 d . . . 
O69 O -1.0503(7) 0.6362(6) 0.3615(2) 0.051(5) Uani 1 1 d . . . 
O68 O -0.8627(7) 0.9329(6) 0.5146(2) 0.047(5) Uani 1 1 d . . . 
O67 O -0.4380(6) 0.7104(6) 0.3194(3) 0.045(5) Uani 1 1 d . . . 
O66 O -0.5544(7) 0.2360(6) 0.3216(3) 0.048(5) Uani 1 1 d . . . 
O65 O -0.4677(6) 0.6532(6) 0.3992(3) 0.046(5) Uani 1 1 d . . . 
O64 O -0.6661(6) 0.3960(6) 0.4542(2) 0.040(4) Uani 1 1 d . . . 
O63 O -0.8898(6) 0.9218(6) 0.5913(3) 0.045(5) Uani 1 1 d . . . 
O62 O -1.0184(6) 0.5871(6) 0.3061(3) 0.044(4) Uani 1 1 d . . . 
O61 O -0.6093(7) 0.7435(6) 0.4430(2) 0.042(4) Uani 1 1 d . . . 
O60 O -0.9605(7) 0.5780(6) 0.2351(2) 0.052(5) Uani 1 1 d . . . 
O59 O -0.7322(7) 0.6687(6) 0.2518(2) 0.052(5) Uani 1 1 d . . . 
O58 O -0.6072(7) 0.5176(5) 0.4678(2) 0.044(4) Uani 1 1 d . . . 
O57 O -0.6676(6) 0.9076(7) 0.5158(3) 0.061(5) Uani 1 1 d . . . 
O56 O -0.5559(7) 0.3173(6) 0.3055(2) 0.045(4) Uani 1 1 d . . . 
O55 O -0.8031(6) 0.4490(7) 0.5063(2) 0.048(5) Uani 1 1 d . . . 
O54 O -0.8035(7) 0.6066(6) 0.2493(2) 0.049(5) Uani 1 1 d . . . 
O53 O -0.5696(7) 0.5180(7) 0.2629(3) 0.056(5) Uani 1 1 d . . . 
O52 O -0.7351(7) 0.2864(6) 0.3997(2) 0.046(5) Uani 1 1 d . . . 
O51 O -0.8791(7) 0.5329(7) 0.4812(2) 0.056(5) Uani 1 1 d . . . 
O50 O -0.4575(6) 0.4679(6) 0.4191(3) 0.052(5) Uani 1 1 d . . . 
O49 O -0.9204(7) 0.8419(6) 0.3907(3) 0.060(5) Uani 1 1 d . . . 
O48 O -0.7085(7) 0.1528(7) 0.3389(3) 0.055(5) Uani 1 1 d . . . 
O47 O -1.0289(6) 0.5168(6) 0.3513(2) 0.045(4) Uani 1 1 d . . . 
O46 O -0.6824(7) 0.8560(6) 0.6077(3) 0.061(5) Uani 1 1 d . . . 
O45 O -0.8385(6) 0.6426(6) 0.4395(2) 0.042(4) Uani 1 1 d . . . 
O44 O -0.7059(7) 1.0464(6) 0.5921(3) 0.053(5) Uani 1 1 d . . . 
O43 O -0.4426(6) 0.5421(6) 0.3996(2) 0.047(5) Uani 1 1 d . . . 
O42 O -0.9996(7) 0.4244(6) 0.2654(2) 0.053(5) Uani 1 1 d . . . 
O41 O -1.0105(7) 0.5578(8) 0.3966(3) 0.069(6) Uani 1 1 d . . . 
O40 O -0.5796(7) 0.4017(7) 0.2606(3) 0.060(5) Uani 1 1 d . . . 
O39 O -0.7522(7) 0.9113(6) 0.3778(2) 0.056(5) Uani 1 1 d . . . 
O38 O -0.7928(7) 0.7770(6) 0.5544(2) 0.052(5) Uani 1 1 d . . . 
O37 O -0.9487(6) 0.7599(6) 0.3466(3) 0.049(5) Uani 1 1 d . . . 
O36 O -0.9890(7) 0.4116(7) 0.3386(3) 0.057(5) Uani 1 1 d . . . 
O35 O -0.8045(7) 0.8480(6) 0.4080(2) 0.046(5) Uani 1 1 d . . . 
O34 O -0.7591(7) 0.7596(7) 0.5999(2) 0.056(5) Uani 1 1 d . . . 
O33 O -0.6161(7) 0.2621(6) 0.3992(2) 0.053(5) Uani 1 1 d . . . 
O32 O -0.9665(7) 0.3668(7) 0.3837(2) 0.056(5) Uani 1 1 d . . . 
O31 O -0.5164(7) 0.3570(6) 0.4325(3) 0.052(5) Uani 1 1 d . . . 
O30 O -1.0537(7) 0.4995(7) 0.2348(3) 0.060(5) Uani 1 1 d . . . 
O29 O -0.6575(7) 0.3636(7) 0.2720(3) 0.065(6) Uani 1 1 d . . . 
O28 O -0.6769(8) 0.1810(7) 0.3086(3) 0.065(5) Uani 1 1 d . . . 
O27 O -0.9161(7) 0.8464(6) 0.3475(2) 0.050(5) Uani 1 1 d . . . 
O26 O -0.9857(7) 0.3208(7) 0.3409(3) 0.058(5) Uani 1 1 d . . . 
O25 O -0.8011(7) 1.0461(6) 0.5947(3) 0.059(5) Uani 1 1 d . . . 
O24 O -1.0406(6) 0.5556(7) 0.2738(2) 0.049(5) Uani 1 1 d . . . 
O23 O -0.6319(7) 0.9279(8) 0.5974(3) 0.075(6) Uani 1 1 d . . . 
O22 O -0.4624(6) 0.4421(6) 0.3362(3) 0.055(5) Uani 1 1 d . . . 
O21 O -0.9830(7) 0.6691(7) 0.3845(3) 0.065(6) Uani 1 1 d . . . 
O20 O -0.6766(7) 1.0740(7) 0.5518(3) 0.064(5) Uani 1 1 d . . . 
O19 O -0.7543(8) 0.9924(7) 0.5035(3) 0.068(6) Uani 1 1 d . . . 
O18 O -0.8758(8) 0.4158(9) 0.4672(3) 0.084(7) Uani 1 1 d . . . 
O17 O -0.5752(7) 0.1428(6) 0.3408(3) 0.065(6) Uani 1 1 d . . . 
O16 O -0.4014(7) 0.5541(7) 0.3091(3) 0.071(6) Uani 1 1 d . . . 
O15 O -0.6182(8) 0.6840(8) 0.2702(3) 0.076(6) Uani 1 1 d . . . 
O14 O -0.7786(7) 0.8176(6) 0.5240(2) 0.051(5) Uani 1 1 d . . . 
O13 O -0.3726(7) 0.6942(7) 0.3577(3) 0.072(6) Uani 1 1 d . . . 
O12 O -0.5058(8) 0.3511(7) 0.3989(3) 0.070(6) Uani 1 1 d . . . 
O11 O -0.7976(5) 0.6223(5) 0.3970(2) 0.024(4) Uani 1 1 d . . . 
O10 O -0.7743(5) 0.4120(5) 0.31484(19) 0.018(3) Uani 1 1 d . . . 
O9 O -0.5762(5) 0.5577(6) 0.4087(2) 0.042(4) Uani 1 1 d . . . 
O8 O -0.3484(6) 0.5773(8) 0.3559(3) 0.085(7) Uani 1 1 d . . . 
C246 C -0.9682 0.7639 0.2880 0.030 Uani 1 1 d . . . 
C245 C -0.7290 0.4863 0.2351 0.034 Uani 1 1 d . . . 
C244 C -0.5372 0.2693 0.3089 0.038 Uani 1 1 d . . . 
C243 C -0.4909 0.2482 0.2958 0.041 Uani 1 1 d . . . 
C242 C -1.1607 0.5602 0.2815 0.043 Uani 1 1 d . . . 
C241 C -0.5436 0.4452 0.4816 0.032 Uani 1 1 d . . . 
C240 C -0.5003 0.4116 0.4785 0.042 Uani 1 1 d . . . 
C239 C -0.3784 0.5260 0.4316 0.038 Uani 1 1 d . . . 
C238 C -0.5682 0.4477 0.5010 0.053 Uani 1 1 d . . . 
C237 C -1.0177 0.8304 0.3375 0.051 Uani 1 1 d . . . 
C236 C -0.3779 0.7261 0.4115 0.068 Uani 1 1 d . . . 
C235 C -0.7456 0.6924 0.1864 0.069 Uani 1 1 d . . . 
C234 C -0.7781 0.2503 0.2557 0.068 Uani 1 1 d . . . 
C233 C -0.7301 0.5940 0.4830 0.048 Uani 1 1 d . . . 
C232 C -0.6068 0.7750 0.4267 0.052 Uani 1 1 d . . . 
C231 C -1.0281 0.8835 0.3358 0.111 Uani 1 1 d . . . 
C230 C -0.6878 0.4919 0.2000 0.074 Uani 1 1 d . . . 
C229 C -0.7922 0.4922 0.2010 0.079 Uani 1 1 d . . . 
C228 C -0.5962 0.3030 0.2562 0.086 Uani 1 1 d . . . 
C227 C -1.0324 0.8439 0.6165 0.080 Uani 1 1 d . . . 
C226 C -0.4011 0.3125 0.3529 0.150 Uani 1 1 d . . . 
C225 C -0.6984 0.4984 0.1789 0.099 Uani 1 1 d . . . 
C224 C -0.6309 0.8706 0.6495 0.101 Uani 1 1 d . . . 
C223 C -1.0798 0.9018 0.3289 0.138 Uani 1 1 d . . . 
C222 C -0.4837 0.2368 0.4029 0.112 Uani 1 1 d . . . 
C221 C -1.1602 0.3149 0.3107 0.112 Uani 1 1 d . . . 
C220 C -0.8421 0.6888 0.5355 0.093 Uani 1 1 d . . . 
C219 C -0.4643 0.3911 0.3425 0.034 Uani 1 1 d . . . 
C218 C -0.7919 0.2487 0.4490 0.099 Uani 1 1 d . . . 
C217 C -0.6249 0.2527 0.2619 0.133 Uani 1 1 d . . . 
C216 C -0.9303 0.7945 0.6132 0.119 Uani 1 1 d . . . 
C215 C -0.2502 0.5538 0.3652 0.111 Uani 1 1 d . . . 
C214 C -0.4763 0.1788 0.4053 0.136 Uani 1 1 d . . . 
C213 C -0.5778 0.9172 0.4513 0.196 Uani 1 1 d . . . 
C212 C -1.0861 0.3696 0.3904 0.136 Uani 1 1 d . . . 
C211 C -0.4208 0.4619 0.2663 0.261 Uani 1 1 d . . . 
C210 C -0.6260 0.8728 0.4146 0.158 Uani 1 1 d . . . 
O7 O -0.7923 0.9067 0.3456 0.061 Uani 1 1 d . . . 
C209 C -0.7539 0.9248 0.3590 0.037 Uani 1 1 d . . . 
N50 N -0.2918 0.5590 0.4611 0.086 Uani 1 1 d . . . 
N49 N -0.5562 0.2061 0.2411 0.156 Uani 1 1 d . . . 
O6 O -0.6889 0.7790 0.2792 0.094 Uani 1 1 d . . . 
N48 N -0.6255 1.0387 0.3414 0.124 Uani 1 1 d . . . 
N47 N -0.7474 0.5040 0.1682 0.096 Uani 1 1 d . . . 
N46 N -0.8502 0.0679 0.2829 0.108 Uani 1 1 d . . . 
N45 N -1.0710 0.9157 0.4852 0.123 Uani 1 1 d . . . 
N44 N -0.1412 0.5040 0.3611 0.126 Uani 1 1 d . . . 
N43 N -0.6261 0.2389 0.5053 0.139 Uani 1 1 d . . . 
N42 N -0.5640 0.9154 0.6736 0.138 Uani 1 1 d . . . 
N41 N -1.1142 0.5681 0.4621 0.183 Uani 1 1 d . . . 
C208 C -0.5450 0.3024 0.2450 0.077 Uani 1 1 d . . . 
C207 C -0.4055 0.3663 0.3460 0.104 Uani 1 1 d . . . 
C206 C -0.6556 0.1177 0.4083 0.094 Uani 1 1 d . . . 
C205 C -0.9867 0.8751 0.6098 0.114 Uani 1 1 d . . . 
C204 C -1.1537 0.4090 0.3055 0.109 Uani 1 1 d . . . 
C203 C -0.9622 0.9208 0.4879 0.118 Uani 1 1 d . . . 
C202 C -0.7936 0.4999 0.1779 0.115 Uani 1 1 d . . . 
C201 C -0.5210 0.2518 0.2397 0.117 Uani 1 1 d . . . 
C200 C -1.0288 0.5321 0.4521 0.115 Uani 1 1 d . . . 
C199 C -0.8383 0.6423 0.1843 0.102 Uani 1 1 d . . . 
C198 C -1.0011 0.6932 0.4590 0.119 Uani 1 1 d . . . 
C197 C -0.4072 0.5152 0.2737 0.116 Uani 1 1 d . . . 
N40 N -0.3476 0.8078 0.4341 0.135 Uani 1 1 d . . . 
C196 C -0.3954 0.8026 0.4420 0.127 Uani 1 1 d . . . 
C195 C -0.7839 1.1212 0.6292 0.138 Uani 1 1 d . . . 
C194 C -0.6935 0.3148 0.5007 0.124 Uani 1 1 d . . . 
C193 C -0.9955 0.3815 0.2772 0.034 Uani 1 1 d . . . 
C192 C -0.9789 0.7674 0.6185 0.172 Uani 1 1 d . . . 
C191 C -0.3570 0.5361 0.2415 0.220 Uani 1 1 d . . . 
C190 C -1.0186 0.9088 0.4777 0.134 Uani 1 1 d . . . 
C189 C -0.1976 0.5597 0.3804 0.169 Uani 1 1 d . . . 
C188 C -0.6078 0.2082 0.2524 0.193 Uani 1 1 d . . . 
C187 C -0.3680 0.5573 0.2670 0.224 Uani 1 1 d . . . 
C186 C -0.6727 0.2673 0.5099 0.142 Uani 1 1 d . . . 
C185 C -1.1310 0.5921 0.4419 0.172 Uani 1 1 d . . . 
C184 C -0.7715 1.1545 0.6461 0.228 Uani 1 1 d . . . 
C183 C -0.6779 1.1548 0.6410 0.206 Uani 1 1 d . . . 
C182 C -0.3027 0.3626 0.3401 0.158 Uani 1 1 d . . . 
C181 C -1.0662 0.5350 0.4665 0.178 Uani 1 1 d . . . 
C180 C -0.6098 0.8834 0.6715 0.184 Uani 1 1 d . . . 
N39 N -0.4703 0.9126 0.3891 0.111 Uani 1 1 d . . . 
C179 C -0.6245 0.9297 0.4195 0.245 Uani 1 1 d . . . 
O5 O -0.7293 0.8138 0.3147 0.086 Uani 1 1 d . . . 
N38 N -0.6401 0.6691 0.3758 0.054 Uani 1 1 d . . . 
N37 N -0.6276 0.5408 0.4122 0.064 Uani 1 1 d . . . 
C178 C -0.9304 0.7166 0.2969 0.025 Uani 1 1 d . . . 
C177 C -0.8839 0.8736 0.5977 0.048 Uani 1 1 d . . . 
N36 N -0.9365 1.0292 0.5818 0.050 Uani 1 1 d . . . 
N35 N -0.7714 0.8805 0.4865 0.040 Uani 1 1 d . . . 
C176 C -1.0419 0.3405 0.2712 0.039 Uani 1 1 d . . . 
C175 C -0.8575 0.6874 0.4338 0.033 Uani 1 1 d . . . 
C174 C -0.5739 0.4793 0.4637 0.049 Uani 1 1 d . . . 
C173 C -0.9223 0.8933 0.3908 0.052 Uani 1 1 d . . . 
C172 C -0.7714 0.8264 0.4224 0.036 Uani 1 1 d . . . 
N34 N -0.5767 0.4513 0.3676 0.048 Uani 1 1 d . . . 
N33 N -0.8480 0.6082 0.3878 0.054 Uani 1 1 d . . . 
C171 C -0.9119 0.7118 0.4414 0.043 Uani 1 1 d . . . 
N32 N -0.6507 0.5696 0.2977 0.083 Uani 1 1 d . . . 
O4 O -0.9521 0.5503 0.2023 0.056 Uani 1 1 d . . . 
N31 N -1.0399 0.8496 0.2747 0.074 Uani 1 1 d . . . 
C170 C -1.1166 0.5839 0.2946 0.029 Uani 1 1 d . . . 
N30 N -0.7918 0.6475 0.3129 0.042 Uani 1 1 d . . . 
C169 C -0.4730 0.6809 0.4152 0.035 Uani 1 1 d . . . 
C168 C -0.6379 0.1734 0.4121 0.038 Uani 1 1 d . . . 
C167 C -0.8038 0.3237 0.2800 0.025 Uani 1 1 d . . . 
C166 C -0.8235 0.7285 0.5232 0.049 Uani 1 1 d . . . 
N29 N -0.7355 0.4301 0.3043 0.068 Uani 1 1 d . . . 
C165 C -0.4802 0.7386 0.3129 0.046 Uani 1 1 d . . . 
C164 C -1.0238 0.7520 0.2769 0.085 Uani 1 1 d . . . 
N28 N -0.7900 0.3869 0.3791 0.057 Uani 1 1 d . . . 
C163 C -0.9718 0.9209 0.4016 0.044 Uani 1 1 d . . . 
C162 C -1.0326 0.6678 0.3758 0.045 Uani 1 1 d . . . 
C161 C -1.0082 0.6281 0.2078 0.042 Uani 1 1 d . . . 
C160 C -0.7825 0.6525 0.2175 0.043 Uani 1 1 d . . . 
C159 C -0.7920 0.3053 0.2589 0.031 Uani 1 1 d . . . 
C158 C -0.6267 0.2140 0.3954 0.041 Uani 1 1 d . . . 
C157 C -0.9967 0.5421 0.4147 0.053 Uani 1 1 d . . . 
C156 C -0.5797 0.7916 0.3561 0.031 Uani 1 1 d . . . 
C155 C -1.0106 0.3631 0.3358 0.045 Uani 1 1 d . . . 
N27 N -0.8963 0.4884 0.3512 0.058 Uani 1 1 d . . . 
C154 C -0.9705 0.5812 0.2143 0.038 Uani 1 1 d . . . 
C153 C -0.7742 0.6397 0.2417 0.048 Uani 1 1 d . . . 
C152 C -0.9292 1.0816 0.5898 0.055 Uani 1 1 d . . . 
C151 C -0.7512 0.2944 0.4175 0.037 Uani 1 1 d . . . 
C150 C -0.8007 0.0919 0.3173 0.066 Uani 1 1 d . . . 
C149 C -0.8070 0.9050 0.4704 0.040 Uani 1 1 d . . . 
C148 C -0.7152 0.6186 0.5227 0.057 Uani 1 1 d . . . 
C147 C -1.0357 0.2888 0.2765 0.072 Uani 1 1 d . . . 
C146 C -0.7117 0.1539 0.3183 0.064 Uani 1 1 d . . . 
C145 C -0.9499 0.8162 0.2913 0.065 Uani 1 1 d . . . 
C144 C -0.9554 0.8092 0.3443 0.034 Uani 1 1 d . . . 
C143 C -0.9119 0.9460 0.5222 0.051 Uani 1 1 d . . . 
C142 C -0.7960 0.7793 0.5341 0.051 Uani 1 1 d . . . 
C141 C -0.7047 0.6334 0.5016 0.058 Uani 1 1 d . . . 
C140 C -0.7404 0.4891 0.2115 0.063 Uani 1 1 d . . . 
C139 C -0.7908 0.3417 0.2416 0.050 Uani 1 1 d . . . 
C138 C -0.4284 0.7244 0.4218 0.049 Uani 1 1 d . . . 
C137 C -0.4673 0.7990 0.3092 0.043 Uani 1 1 d . . . 
C136 C -0.7589 0.1192 0.3065 0.058 Uani 1 1 d . . . 
C135 C -0.5378 0.8360 0.3669 0.062 Uani 1 1 d . . . 
C134 C -0.4308 0.5113 0.4146 0.033 Uani 1 1 d . . . 
C133 C -1.0791 0.2505 0.2673 0.067 Uani 1 1 d . . . 
C132 C -1.0413 0.5550 0.4315 0.075 Uani 1 1 d . . . 
C131 C -0.7348 0.8405 0.4806 0.041 Uani 1 1 d . . . 
C130 C -1.0542 0.5744 0.2911 0.039 Uani 1 1 d . . . 
C129 C -0.9646 0.9328 0.5095 0.061 Uani 1 1 d . . . 
C128 C -0.7763 0.3255 0.2221 0.058 Uani 1 1 d . . . 
C127 C -0.7318 0.8213 0.4606 0.048 Uani 1 1 d . . . 
C126 C -0.4285 0.5227 0.2955 0.061 Uani 1 1 d . . . 
C125 C -0.5038 0.3315 0.4160 0.043 Uani 1 1 d . . . 
C124 C -0.8099 0.8871 0.4501 0.044 Uani 1 1 d . . . 
C123 C -0.7392 0.6865 0.2084 0.071 Uani 1 1 d . . . 
C122 C -0.6770 0.6817 0.4976 0.059 Uani 1 1 d . . . 
C121 C -0.9889 0.8563 0.2844 0.067 Uani 1 1 d . . . 
C120 C -1.0717 0.3644 0.3243 0.062 Uani 1 1 d . . . 
N26 N -0.7630 0.2699 0.2189 0.074 Uani 1 1 d . . . 
N25 N -1.1272 0.2630 0.2573 0.062 Uani 1 1 d . . . 
C119 C -0.5670 0.9270 0.5185 0.041 Uani 1 1 d . . . 
N24 N -0.8638 0.6319 0.5041 0.070 Uani 1 1 d . . . 
N23 N -0.7938 0.6709 0.1752 0.098 Uani 1 1 d . . . 
C118 C -0.5190 0.9607 0.5257 0.050 Uani 1 1 d . . . 
C117 C -0.7691 0.8445 0.4461 0.043 Uani 1 1 d . . . 
C116 C -0.3704 0.4959 0.4502 0.056 Uani 1 1 d . . . 
C115 C -0.6264 0.9348 0.5245 0.037 Uani 1 1 d . . . 
C114 C -1.0600 0.7926 0.3307 0.056 Uani 1 1 d . . . 
C113 C -0.9659 0.9703 0.4107 0.044 Uani 1 1 d . . . 
C112 C -0.9858 1.0037 0.5813 0.056 Uani 1 1 d . . . 
C111 C -0.6875 0.3836 0.4701 0.042 Uani 1 1 d . . . 
C110 C -1.0107 0.6479 0.1867 0.052 Uani 1 1 d . . . 
C109 C -1.0607 0.7961 0.2710 0.072 Uani 1 1 d . . . 
C108 C -1.1337 0.6161 0.3108 0.068 Uani 1 1 d . . . 
C107 C -1.1024 0.3151 0.3219 0.059 Uani 1 1 d . . . 
C106 C -0.8236 0.7223 0.5016 0.070 Uani 1 1 d . . . 
C105 C -0.8448 0.6723 0.4924 0.051 Uani 1 1 d . . . 
C104 C -0.5543 0.8885 0.3662 0.084 Uani 1 1 d . . . 
C103 C -0.4854 0.2684 0.4207 0.059 Uani 1 1 d . . . 
O3 O -0.6092 0.7575 0.4085 0.067 Uani 1 1 d . . . 
N22 N -0.4528 0.9072 0.5064 0.054 Uani 1 1 d . . . 
C102 C -0.6168 0.3059 0.4775 0.055 Uani 1 1 d . . . 
C101 C -0.7397 1.1010 0.6192 0.066 Uani 1 1 d . . . 
C100 C -0.6039 0.8380 0.4306 0.077 Uani 1 1 d . . . 
C99 C -1.0760 0.7064 0.3863 0.067 Uani 1 1 d . . . 
C98 C -0.6629 0.3363 0.4836 0.073 Uani 1 1 d . . . 
C97 C -0.4658 0.9521 0.5197 0.068 Uani 1 1 d . . . 
C96 C -1.0442 0.6580 0.2218 0.062 Uani 1 1 d . . . 
C95 C -0.7812 0.2449 0.4276 0.056 Uani 1 1 d . . . 
C94 C -0.8285 0.6301 0.2057 0.068 Uani 1 1 d . . . 
C93 C -1.0926 0.3548 0.2603 0.063 Uani 1 1 d . . . 
C92 C -0.7074 0.9677 0.3527 0.071 Uani 1 1 d . . . 
C91 C -0.5135 0.8350 0.3084 0.084 Uani 1 1 d . . . 
C90 C -0.8467 0.0647 0.3037 0.087 Uani 1 1 d . . . 
C89 C -0.4850 0.1965 0.2915 0.072 Uani 1 1 d . . . 
C88 C -0.7500 1.0602 0.5999 0.067 Uani 1 1 d . . . 
N21 N -1.2345 0.6027 0.2997 0.064 Uani 1 1 d . . . 
C87 C -0.5507 0.8830 0.5043 0.048 Uani 1 1 d . . . 
N20 N -1.1845 0.3594 0.3029 0.091 Uani 1 1 d . . . 
N19 N -0.4974 0.3788 0.5137 0.071 Uani 1 1 d . . . 
N18 N -0.4038 0.2141 0.2719 0.089 Uani 1 1 d . . . 
N17 N -0.6697 0.7061 0.5339 0.085 Uani 1 1 d . . . 
C86 C -0.6591 0.7146 0.5139 0.057 Uani 1 1 d . . . 
C85 C -0.5409 0.4132 0.5170 0.071 Uani 1 1 d . . . 
C84 C -0.6078 0.3618 0.2633 0.066 Uani 1 1 d . . . 
C83 C -0.4398 0.1813 0.2794 0.071 Uani 1 1 d . . . 
C82 C -0.4962 0.8755 0.5002 0.061 Uani 1 1 d . . . 
C81 C -0.9360 0.8472 0.6068 0.068 Uani 1 1 d . . . 
C80 C -1.2185 0.5662 0.2854 0.060 Uani 1 1 d . . . 
C79 C -1.1917 0.6246 0.3127 0.082 Uani 1 1 d . . . 
N16 N -1.0872 0.7130 0.1915 0.071 Uani 1 1 d . . . 
C78 C -1.0701 0.9310 0.5065 0.099 Uani 1 1 d . . . 
C77 C -0.6985 0.6600 0.5383 0.085 Uani 1 1 d . . . 
C76 C -1.0529 0.6898 0.1795 0.071 Uani 1 1 d . . . 
C75 C -0.3252 0.5151 0.4641 0.068 Uani 1 1 d . . . 
C74 C -1.0227 0.8929 0.4016 0.061 Uani 1 1 d . . . 
C73 C -0.7912 0.1974 0.4147 0.081 Uani 1 1 d . . . 
C72 C -0.4537 0.2877 0.2897 0.083 Uani 1 1 d . . . 
C71 C -0.3480 0.5707 0.4263 0.081 Uani 1 1 d . . . 
N15 N -1.0298 0.7934 0.6206 0.071 Uani 1 1 d . . . 
O2 O -0.9522 0.4427 0.4827 0.103 Uani 1 1 d . . . 
N14 N -0.6662 0.1008 0.4439 0.086 Uani 1 1 d . . . 
N13 N -0.8287 0.1550 0.4462 0.093 Uani 1 1 d . . . 
N12 N -1.1228 0.8676 0.3210 0.099 Uani 1 1 d . . . 
N11 N -1.0108 0.7476 0.4586 0.111 Uani 1 1 d . . . 
C70 C -1.0389 0.3874 0.4047 0.087 Uani 1 1 d . . . 
N10 N -1.1579 0.7681 0.4045 0.121 Uani 1 1 d . . . 
C69 C -0.5718 0.9399 0.6391 0.085 Uani 1 1 d . . . 
C68 C -0.6160 0.9024 0.6338 0.085 Uani 1 1 d . . . 
N9 N -0.4433 0.9097 0.3012 0.118 Uani 1 1 d . . . 
C67 C -0.9238 0.7667 0.4407 0.073 Uani 1 1 d . . . 
C66 C -0.4407 0.7618 0.4381 0.077 Uani 1 1 d . . . 
C65 C -0.4747 0.3792 0.4933 0.077 Uani 1 1 d . . . 
C64 C -0.7621 0.1232 0.2840 0.076 Uani 1 1 d . . . 
N8 N -0.4756 0.1581 0.4245 0.148 Uani 1 1 d . . . 
C63 C -1.0824 0.7003 0.2113 0.075 Uani 1 1 d . . . 
C62 C -1.1339 0.3126 0.2537 0.069 Uani 1 1 d . . . 
C61 C -0.9762 0.3878 0.4004 0.067 Uani 1 1 d . . . 
C60 C -1.0968 0.4133 0.3144 0.092 Uani 1 1 d . . . 
C59 C -0.4909 0.8185 0.3788 0.080 Uani 1 1 d . . . 
C58 C -1.1156 0.8142 0.3219 0.092 Uani 1 1 d . . . 
C57 C -0.5949 0.2608 0.4881 0.091 Uani 1 1 d . . . 
C56 C -0.6444 0.8958 0.6103 0.080 Uani 1 1 d . . . 
C55 C -0.6338 0.1895 0.4340 0.067 Uani 1 1 d . . . 
C54 C -0.8175 0.1522 0.4247 0.078 Uani 1 1 d . . . 
C53 C -0.6724 0.0793 0.4234 0.100 Uani 1 1 d . . . 
C52 C -0.4786 0.2477 0.4408 0.102 Uani 1 1 d . . . 
C51 C -0.8085 0.0953 0.2722 0.103 Uani 1 1 d . . . 
C50 C -0.6446 0.1526 0.4498 0.079 Uani 1 1 d . . . 
C49 C -0.7678 0.2341 0.2354 0.087 Uani 1 1 d . . . 
C48 C -0.4119 0.8156 0.3068 0.095 Uani 1 1 d . . . 
C47 C -0.4712 0.1894 0.4420 0.108 Uani 1 1 d . . . 
C46 C -0.8648 0.6420 0.5249 0.094 Uani 1 1 d . . . 
C45 C -0.9724 0.7841 0.4492 0.091 Uani 1 1 d . . . 
C44 C -1.0180 0.9381 0.5186 0.107 Uani 1 1 d . . . 
C43 C -1.1013 0.7675 0.4125 0.100 Uani 1 1 d . . . 
C42 C -0.9493 0.6714 0.4512 0.087 Uani 1 1 d . . . 
C41 C -0.9507 0.3492 0.4730 0.109 Uani 1 1 d . . . 
C40 C -0.6587 1.0126 0.3266 0.117 Uani 1 1 d . . . 
C39 C -0.6759 0.9967 0.3688 0.090 Uani 1 1 d . . . 
C38 C -0.4983 0.8927 0.3033 0.096 Uani 1 1 d . . . 
C37 C -1.1317 0.7055 0.3783 0.122 Uani 1 1 d . . . 
C36 C -0.9183 0.4068 0.4759 0.105 Uani 1 1 d . . . 
O1 O -0.2983 0.6346 0.3789 0.136 Uani 1 1 d . . . 
N7 N -0.3008 0.3130 0.3480 0.124 Uani 1 1 d . . . 
C35 C -0.3045 0.5867 0.3669 0.092 Uani 1 1 d . . . 
N6 N -0.5842 0.9517 0.4358 0.160 Uani 1 1 d . . . 
N5 N -1.1580 0.3968 0.4110 0.166 Uani 1 1 d . . . 
C34 C -0.3035 0.5861 0.4432 0.085 Uani 1 1 d . . . 
N4 N -0.9985 0.2440 0.4659 0.181 Uani 1 1 d . . . 
C33 C -1.0602 0.7365 0.4030 0.084 Uani 1 1 d . . . 
N3 N -0.7160 1.1695 0.6526 0.146 Uani 1 1 d . . . 
C32 C -0.4051 0.2734 0.2768 0.095 Uani 1 1 d . . . 
C31 C -0.6822 1.1169 0.6261 0.129 Uani 1 1 d . . . 
C30 C -0.8125 0.2008 0.4579 0.130 Uani 1 1 d . . . 
C29 C -1.0515 0.4171 0.4238 0.143 Uani 1 1 d . . . 
C28 C -0.6981 0.9722 0.3305 0.107 Uani 1 1 d . . . 
C27 C -0.4011 0.8727 0.3021 0.112 Uani 1 1 d . . . 
C26 C -0.5142 0.9270 0.3794 0.140 Uani 1 1 d . . . 
C25 C -0.5482 0.9452 0.6592 0.104 Uani 1 1 d . . . 
C24 C -0.1861 0.5015 0.3460 0.142 Uani 1 1 d . . . 
C23 C -0.9353 0.3215 0.4539 0.150 Uani 1 1 d . . . 
C22 C -1.0891 0.5844 0.4274 0.122 Uani 1 1 d . . . 
C21 C -0.3366 0.7680 0.4172 0.118 Uani 1 1 d . . . 
C20 C -0.1468 0.5376 0.3732 0.145 Uani 1 1 d . . . 
C19 C -0.2463 0.5272 0.3483 0.151 Uani 1 1 d . . . 
C18 C -0.5864 0.8568 0.4516 0.144 Uani 1 1 d . . . 
C17 C -0.6356 1.0323 0.3616 0.118 Uani 1 1 d . . . 
C16 C -1.1148 0.4216 0.4258 0.182 Uani 1 1 d . . . 
C15 C -0.3545 0.3943 0.3396 0.155 Uani 1 1 d . . . 
C14 C -0.4533 0.8587 0.3901 0.128 Uani 1 1 d . . . 
C13 C -0.4029 0.4593 0.2468 0.334 Uani 1 1 d . . . 
C12 C -1.1781 0.7330 0.3874 0.157 Uani 1 1 d . . . 
C11 C -0.9917 0.3335 0.4857 0.160 Uani 1 1 d . . . 
C10 C -1.1335 0.3705 0.3936 0.178 Uani 1 1 d . . . 
C9 C -0.9753 0.2681 0.4467 0.273 Uani 1 1 d . . . 
C8 C -1.0106 0.2771 0.4826 0.198 Uani 1 1 d . . . 
N2 N -0.3596 0.4762 0.2281 0.486 Uani 1 1 d . . . 
C7 C -0.7231 0.8180 0.2962 0.138 Uani 1 1 d . . . 
O1W O -0.7928 0.1701 0.3653 0.071 Uani 1 1 d . . . 
O2W O -0.2771 0.7416 0.3203 0.070 Uani 1 1 d . . . 
O3W O -0.7999 0.7507 0.6387 0.092 Uani 1 1 d . . . 
O4W O -0.5168 0.6233 0.2722 0.081 Uani 1 1 d . . . 
O5W O -0.3520 0.8817 0.4881 0.094 Uani 1 1 d . . . 
O6W O -0.4542 1.0140 0.2806 0.111 Uani 1 1 d . . . 
C6 C -0.3485 0.2920 0.3588 0.328 Uani 1 1 d . . . 
O21W O -0.4861 0.9541 0.5805 0.117 Uani 1 1 d . . . 
O20W O -0.7728 0.5582 0.1317 0.119 Uani 1 1 d . . . 
O19W O -0.5415 0.7489 0.4825 0.119 Uani 1 1 d . . . 
O18W O -0.7902 1.1644 0.5635 0.128 Uani 1 1 d . . . 
O17W O -0.9753 0.5346 0.1574 0.135 Uani 1 1 d . . . 
O16W O -0.7923 0.9984 0.4085 0.145 Uani 1 1 d . . . 
O15W O -1.0731 0.1662 0.4511 0.164 Uani 1 1 d . . . 
O14W O -0.8859 0.9901 0.6329 0.152 Uani 1 1 d . . . 
O13W O -0.9119 1.0049 0.3519 0.158 Uani 1 1 d . . . 
O12W O -0.8336 0.0321 0.4495 0.183 Uani 1 1 d . . . 
O11W O -0.7004 1.0094 0.4665 0.181 Uani 1 1 d . . . 
O10W O -0.8397 0.0742 0.3771 0.169 Uani 1 1 d . . . 
O9W O -0.7184 0.6532 0.5915 0.273 Uani 1 1 d . . . 
O8W O -0.7769 1.0991 0.5080 0.222 Uani 1 1 d . . . 
O7W O -0.9013 0.9421 0.3133 0.245 Uani 1 1 d . . . 
C5 C -0.7497 0.9215 0.2546 0.268 Uani 1 1 d . . . 
C4 C -0.7388 0.8708 0.2833 0.298 Uani 1 1 d . . . 
C3 C -0.7275 0.8741 0.2621 0.258 Uani 1 1 d . . . 
C2 C -0.7828 0.9022 0.2896 0.546 Uani 1 1 d . . . 
N1 N -0.7966 0.9513 0.2577 0.309 Uani 1 1 d . . . 
C1 C -0.8118 0.9422 0.2782 0.260 Uani 1 1 d . . . 
 
loop_ 
 _atom_site_aniso_label 
 _atom_site_aniso_U_11 
 _atom_site_aniso_U_22 
 _atom_site_aniso_U_33 
 _atom_site_aniso_U_23 
 _atom_site_aniso_U_13 
 _atom_site_aniso_U_12 
Dy1 0.0209(6) 0.0230(6) 0.0265(7) -0.0006(5) -0.0003(5) -0.0003(5) 
Dy10 0.0205(6) 0.0222(6) 0.0284(7) 0.0008(5) 0.0027(5) 0.0006(5) 
Dy3 0.0188(6) 0.0241(6) 0.0274(7) -0.0020(5) 0.0003(5) 0.0005(5) 
Dy5 0.0210(7) 0.0229(7) 0.0332(7) -0.0025(5) 0.0012(5) 0.0005(5) 
Dy17 0.0267(7) 0.0308(7) 0.0247(7) 0.0011(5) 0.0024(5) -0.0007(5) 
Dy18 0.0263(7) 0.0308(7) 0.0268(7) -0.0016(6) 0.0025(5) 0.0005(5) 
Dy2 0.0248(7) 0.0295(7) 0.0306(7) -0.0004(6) -0.0047(5) -0.0001(5) 
Dy4 0.0231(7) 0.0264(7) 0.0230(7) 0.0026(5) 0.0018(5) 0.0003(5) 
Dy15 0.0192(6) 0.0219(6) 0.0327(7) 0.0018(5) 0.0028(5) 0.0007(5) 
Dy12 0.0293(7) 0.0240(7) 0.0261(7) 0.0018(5) 0.0009(5) -0.0030(5) 
Dy8 0.0293(7) 0.0248(7) 0.0394(8) -0.0064(6) 0.0019(6) 0.0059(6) 
Dy14 0.0193(6) 0.0256(7) 0.0292(7) -0.0010(5) -0.0017(5) -0.0011(5) 
Dy7 0.0214(7) 0.0242(7) 0.0330(7) -0.0023(5) -0.0023(5) 0.0031(5) 
Dy19 0.0228(7) 0.0352(7) 0.0279(7) 0.0014(6) 0.0043(5) -0.0020(6) 
Dy25 0.0229(7) 0.0340(7) 0.0273(7) 0.0044(6) 0.0027(5) -0.0017(5) 
Dy22 0.0212(7) 0.0360(7) 0.0310(7) -0.0008(6) 0.0044(5) 0.0000(6) 
Dy11 0.0302(7) 0.0211(7) 0.0417(8) 0.0010(6) 0.0037(6) 0.0009(5) 
Dy24 0.0250(7) 0.0289(7) 0.0284(7) -0.0024(6) -0.0014(5) -0.0013(5) 
Dy6 0.0239(7) 0.0283(7) 0.0271(7) -0.0045(5) 0.0008(5) 0.0045(5) 
Dy16 0.0184(7) 0.0307(7) 0.0485(8) 0.0026(6) 0.0048(6) -0.0011(5) 
Dy9 0.0220(7) 0.0233(7) 0.0254(7) -0.0012(5) 0.0009(5) -0.0003(5) 
Dy26 0.0260(7) 0.0329(7) 0.0256(7) 0.0014(6) 0.0039(5) 0.0042(6) 
Dy29 0.0293(7) 0.0341(7) 0.0352(8) -0.0078(6) 0.0069(6) -0.0010(6) 
Dy13 0.0194(6) 0.0232(6) 0.0312(7) 0.0011(5) 0.0027(5) -0.0007(5) 
Dy21 0.0223(7) 0.0316(7) 0.0307(7) 0.0013(6) 0.0030(5) -0.0053(5) 
Dy23 0.0252(7) 0.0303(7) 0.0284(7) 0.0009(6) -0.0034(5) 0.0003(5) 
Dy27 0.0358(7) 0.0341(7) 0.0317(8) -0.0075(6) 0.0082(6) -0.0025(6) 
Dy28 0.0337(7) 0.0361(7) 0.0353(8) -0.0049(6) 0.0040(6) -0.0014(6) 
Dy20 0.0334(7) 0.0411(8) 0.0255(7) 0.0001(6) 0.0055(6) -0.0028(6) 
Dy30 0.0310(7) 0.0427(8) 0.0441(8) -0.0150(6) 0.0072(6) -0.0055(6) 
I1 0.102(2) 0.111(2) 0.117(2) 0.0020(17) 0.0116(17) 0.0041(16) 
O159 0.016(8) 0.019(8) 0.013(8) -0.007(6) -0.001(6) 0.001(6) 
O158 0.015(8) 0.016(8) 0.028(9) 0.006(7) -0.002(7) -0.008(6) 
O157 0.011(8) 0.038(9) 0.019(9) 0.001(7) -0.010(6) -0.007(7) 
O156 0.010(8) 0.029(9) 0.041(10) -0.004(8) -0.015(7) 0.006(7) 
O155 0.040(10) 0.007(8) 0.031(9) 0.000(7) 0.006(7) -0.005(7) 
O154 0.021(9) 0.044(10) 0.009(8) 0.005(7) -0.008(6) -0.007(7) 
O153 0.019(9) 0.018(8) 0.049(10) -0.005(7) 0.013(7) -0.002(7) 
O152 0.014(8) 0.018(8) 0.024(9) -0.007(7) -0.001(6) 0.002(6) 
O151 0.030(9) 0.025(9) 0.035(10) -0.001(7) -0.006(7) -0.008(7) 
O150 0.024(9) 0.017(8) 0.037(10) 0.000(7) 0.000(7) -0.004(7) 
O149 0.013(8) 0.021(8) 0.022(9) 0.002(7) -0.004(6) 0.004(6) 
O148 0.020(8) 0.023(8) 0.017(8) -0.001(7) 0.004(7) -0.008(7) 
O147 0.025(9) 0.033(9) 0.014(9) -0.008(7) -0.004(7) -0.010(7) 
O146 0.048(11) 0.016(9) 0.049(11) -0.017(8) -0.009(8) 0.006(8) 
O145 0.026(9) 0.031(9) 0.031(10) -0.005(7) 0.005(7) -0.007(7) 
O144 0.027(9) 0.014(8) 0.029(9) -0.011(7) -0.009(7) 0.012(7) 
O143 0.017(9) 0.042(10) 0.060(12) 0.016(9) 0.020(8) 0.004(8) 
O142 0.013(8) 0.026(9) 0.035(10) 0.010(7) 0.009(7) 0.001(7) 
O141 0.024(9) 0.024(9) 0.022(9) -0.011(7) -0.011(7) 0.000(7) 
O140 0.031(9) 0.026(9) 0.022(9) -0.008(7) 0.006(7) -0.008(7) 
O139 0.026(9) 0.029(9) 0.025(9) 0.000(7) -0.010(7) -0.012(7) 
O138 0.025(9) 0.035(9) 0.028(9) -0.005(7) 0.007(7) -0.004(7) 
O137 0.020(8) 0.027(9) 0.025(9) 0.001(7) 0.009(7) 0.002(7) 
O136 0.025(9) 0.046(10) 0.028(10) -0.008(8) 0.000(7) -0.005(8) 
O135 0.020(9) 0.027(9) 0.027(9) 0.001(7) 0.007(7) -0.006(7) 
O134 0.020(9) 0.017(8) 0.042(10) -0.011(7) -0.003(7) 0.008(7) 
O133 0.031(9) 0.025(9) 0.018(9) 0.008(7) 0.000(7) 0.006(7) 
O132 0.028(9) 0.020(9) 0.040(10) 0.005(7) 0.005(7) 0.012(7) 
O131 0.027(9) 0.025(9) 0.052(11) -0.008(8) 0.020(8) 0.002(7) 
O130 0.040(10) 0.039(10) 0.016(9) -0.008(7) -0.004(7) -0.005(8) 
O129 0.089(14) 0.048(11) 0.018(10) -0.009(8) -0.017(9) 0.005(10) 
O128 0.066(12) 0.046(10) 0.014(9) -0.007(8) 0.008(8) -0.001(9) 
O127 0.023(9) 0.056(11) 0.042(11) -0.003(9) -0.007(8) 0.000(8) 
O126 0.020(9) 0.026(9) 0.030(9) 0.011(7) 0.005(7) 0.015(7) 
O125 0.031(10) 0.039(10) 0.034(10) -0.002(8) -0.014(8) -0.009(8) 
O124 0.025(9) 0.018(8) 0.029(9) -0.001(7) -0.014(7) 0.001(7) 
O123 0.039(10) 0.025(9) 0.047(11) 0.012(8) -0.007(8) 0.012(8) 
O122 0.011(8) 0.012(8) 0.045(10) 0.004(7) -0.004(7) 0.003(6) 
O121 0.032(9) 0.022(9) 0.020(9) 0.007(7) -0.005(7) -0.010(7) 
O120 0.034(9) 0.021(9) 0.033(10) -0.008(7) 0.009(7) -0.004(7) 
O119 0.039(10) 0.030(9) 0.031(10) -0.006(7) 0.008(8) 0.001(8) 
O118 0.034(10) 0.046(10) 0.016(9) -0.002(7) 0.008(7) 0.015(8) 
O117 0.023(9) 0.025(9) 0.027(9) 0.006(7) -0.006(7) 0.015(7) 
O116 0.027(9) 0.023(9) 0.038(10) -0.007(7) 0.003(7) -0.010(7) 
O115 0.016(8) 0.026(9) 0.041(10) -0.004(7) -0.004(7) 0.004(7) 
O114 0.021(9) 0.028(9) 0.027(9) 0.006(7) -0.002(7) -0.002(7) 
O113 0.036(10) 0.051(11) 0.027(10) 0.000(8) -0.001(8) 0.005(8) 
O112 0.023(9) 0.047(10) 0.024(9) 0.005(8) 0.001(7) -0.004(8) 
O111 0.018(8) 0.014(8) 0.042(10) -0.012(7) 0.005(7) -0.010(7) 
O110 0.051(11) 0.019(9) 0.028(10) 0.012(7) 0.004(8) 0.007(8) 
O109 0.038(10) 0.039(10) 0.022(9) 0.024(8) 0.002(7) 0.000(8) 
O108 0.030(9) 0.018(8) 0.031(9) -0.008(7) 0.027(7) 0.008(7) 
O107 0.020(9) 0.024(9) 0.073(12) 0.004(8) 0.000(8) -0.006(7) 
O106 0.039(10) 0.048(11) 0.058(12) -0.007(9) 0.019(9) -0.003(8) 
O105 0.031(9) 0.044(10) 0.014(9) -0.017(7) 0.002(7) -0.007(8) 
O104 0.027(9) 0.020(9) 0.038(10) -0.001(7) -0.010(7) 0.008(7) 
O103 0.028(9) 0.031(9) 0.040(10) 0.008(8) -0.017(8) 0.002(7) 
O102 0.026(10) 0.047(11) 0.077(13) -0.009(10) 0.008(9) 0.002(8) 
O101 0.009(8) 0.063(11) 0.034(10) 0.024(8) 0.002(7) 0.023(8) 
O100 0.038(10) 0.048(10) 0.023(9) 0.008(8) 0.003(7) 0.000(8) 
O99 0.031(10) 0.054(11) 0.029(10) -0.006(8) -0.004(8) 0.006(8) 
O98 0.020(9) 0.049(10) 0.036(10) 0.007(8) 0.010(7) 0.001(8) 
O97 0.022(9) 0.066(11) 0.011(9) 0.010(8) 0.014(7) 0.008(8) 
O96 0.042(11) 0.046(11) 0.063(12) -0.005(9) 0.020(9) 0.014(9) 
O95 0.047(11) 0.065(12) 0.058(12) -0.010(10) -0.003(9) -0.003(9) 
O94 0.026(9) 0.036(10) 0.039(10) -0.008(8) -0.008(7) 0.005(7) 
O93 0.034(11) 0.061(13) 0.097(15) 0.003(11) 0.010(10) -0.007(9) 
O92 0.049(11) 0.031(9) 0.022(9) -0.002(7) 0.009(8) 0.003(8) 
O91 0.012(9) 0.029(9) 0.074(12) -0.011(9) 0.000(8) -0.002(7) 
O90 0.066(12) 0.046(11) 0.027(10) -0.001(8) 0.007(9) -0.010(9) 
O89 0.056(12) 0.046(11) 0.069(13) 0.016(10) 0.028(10) 0.008(9) 
O88 0.042(11) 0.030(10) 0.067(13) 0.007(9) -0.027(9) -0.007(8) 
O87 0.072(13) 0.029(10) 0.054(12) 0.013(9) 0.003(10) -0.005(9) 
O86 0.044(11) 0.051(11) 0.066(13) -0.033(10) 0.019(9) -0.004(9) 
O85 0.042(10) 0.020(9) 0.033(10) 0.000(7) 0.001(8) -0.007(7) 
O84 0.036(10) 0.058(11) 0.021(9) -0.001(8) 0.018(8) 0.013(8) 
O83 0.050(12) 0.058(12) 0.090(15) -0.008(11) -0.010(10) -0.026(10) 
O82 0.039(10) 0.026(9) 0.046(11) 0.007(8) -0.016(8) 0.001(8) 
O81 0.025(9) 0.019(9) 0.061(12) -0.013(8) -0.009(8) -0.005(7) 
O80 0.055(11) 0.051(11) 0.035(11) -0.005(9) 0.013(9) 0.000(9) 
O79 0.073(13) 0.044(11) 0.026(10) -0.003(8) 0.011(9) -0.015(9) 
O78 0.085(14) 0.051(11) 0.039(11) 0.020(9) 0.030(10) 0.015(10) 
O77 0.038(11) 0.052(12) 0.079(14) 0.022(10) 0.011(9) 0.012(9) 
O76 0.019(9) 0.079(13) 0.051(12) -0.010(10) -0.008(8) 0.009(9) 
O75 0.024(9) 0.072(12) 0.040(11) 0.014(9) -0.010(8) 0.009(9) 
O74 0.016(9) 0.049(11) 0.055(12) -0.009(9) -0.005(8) 0.003(8) 
O73 0.033(10) 0.084(13) 0.059(12) 0.020(10) 0.034(9) 0.019(9) 
O72 0.045(11) 0.092(14) 0.061(13) -0.020(11) 0.023(10) -0.047(10) 
O71 0.045(11) 0.066(12) 0.045(11) -0.013(9) 0.002(9) 0.016(9) 
O70 0.037(11) 0.056(11) 0.056(12) 0.028(9) 0.004(9) 0.019(9) 
O69 0.046(11) 0.055(11) 0.051(12) -0.001(9) -0.001(9) 0.010(9) 
O68 0.050(11) 0.045(11) 0.045(11) -0.011(9) -0.004(9) -0.016(9) 
O67 0.020(9) 0.030(10) 0.087(13) 0.014(9) 0.017(9) -0.003(8) 
O66 0.049(11) 0.036(10) 0.061(12) 0.005(9) 0.014(9) 0.000(8) 
O65 0.014(9) 0.055(11) 0.069(12) -0.015(9) -0.007(8) -0.010(8) 
O64 0.043(10) 0.051(11) 0.029(10) 0.013(8) 0.019(8) 0.004(8) 
O63 0.042(11) 0.022(9) 0.074(13) 0.009(9) 0.015(9) 0.007(8) 
O62 0.016(9) 0.037(10) 0.077(13) -0.011(9) -0.001(8) 0.008(8) 
O61 0.058(11) 0.026(9) 0.038(10) -0.002(8) -0.010(9) 0.013(8) 
O60 0.066(12) 0.049(11) 0.042(11) 0.018(9) 0.000(9) -0.005(9) 
O59 0.059(12) 0.051(11) 0.047(12) -0.002(9) 0.011(9) -0.005(9) 
O58 0.064(12) 0.016(9) 0.049(11) 0.001(8) -0.010(9) 0.013(8) 
O57 0.023(10) 0.080(14) 0.080(14) -0.011(11) 0.010(9) -0.017(9) 
O56 0.063(12) 0.018(9) 0.057(12) 0.000(8) 0.014(9) -0.006(8) 
O55 0.039(10) 0.082(13) 0.022(10) 0.006(9) 0.000(8) -0.009(9) 
O54 0.053(12) 0.056(11) 0.038(11) 0.012(9) -0.001(9) -0.007(9) 
O53 0.039(11) 0.069(13) 0.062(13) 0.021(10) 0.005(9) -0.021(9) 
O52 0.064(12) 0.027(10) 0.050(11) -0.004(8) 0.025(9) -0.013(8) 
O51 0.053(12) 0.074(13) 0.042(11) -0.002(10) 0.011(9) 0.012(10) 
O50 0.027(10) 0.057(12) 0.069(13) 0.022(10) -0.016(9) -0.006(8) 
O49 0.050(12) 0.045(11) 0.087(15) 0.006(10) 0.014(10) 0.007(9) 
O48 0.042(11) 0.061(12) 0.060(12) -0.007(10) -0.004(9) -0.001(9) 
O47 0.010(9) 0.063(12) 0.061(12) -0.005(9) 0.006(8) 0.003(8) 
O46 0.076(14) 0.033(11) 0.071(13) -0.002(9) -0.008(11) -0.009(9) 
O45 0.030(10) 0.040(10) 0.058(12) 0.020(9) 0.015(8) 0.012(8) 
O44 0.048(11) 0.050(11) 0.063(12) -0.026(10) 0.020(9) -0.024(9) 
O43 0.031(10) 0.061(12) 0.044(11) 0.012(9) -0.015(8) -0.016(9) 
O42 0.067(12) 0.043(11) 0.047(11) 0.016(9) -0.009(9) -0.036(9) 
O41 0.048(12) 0.103(16) 0.056(13) 0.032(11) 0.009(10) -0.007(11) 
O40 0.063(13) 0.049(11) 0.070(13) 0.008(10) 0.023(10) 0.007(10) 
O39 0.069(13) 0.051(11) 0.048(12) 0.011(9) 0.005(10) -0.015(10) 
O38 0.062(12) 0.046(11) 0.045(11) -0.012(9) -0.005(9) -0.011(9) 
O37 0.025(10) 0.035(10) 0.084(14) 0.001(9) -0.009(9) 0.018(8) 
O36 0.039(11) 0.073(13) 0.058(12) 0.006(10) -0.002(9) -0.019(10) 
O35 0.055(11) 0.049(11) 0.032(10) -0.010(8) -0.004(8) 0.017(9) 
O34 0.074(13) 0.054(12) 0.044(12) 0.005(9) 0.018(10) 0.002(10) 
O33 0.066(12) 0.038(11) 0.051(12) -0.007(9) -0.014(9) -0.014(9) 
O32 0.045(11) 0.083(13) 0.041(11) 0.003(10) 0.014(9) -0.017(10) 
O31 0.046(11) 0.047(11) 0.060(12) 0.006(9) -0.020(9) 0.000(9) 
O30 0.038(11) 0.072(13) 0.063(13) -0.009(10) -0.025(9) 0.007(9) 
O29 0.042(11) 0.067(13) 0.089(15) -0.031(11) 0.014(10) 0.004(10) 
O28 0.080(14) 0.051(12) 0.068(13) -0.021(10) 0.026(11) -0.028(10) 
O27 0.045(11) 0.052(11) 0.051(12) -0.028(9) -0.008(9) -0.001(9) 
O26 0.061(13) 0.052(12) 0.061(13) -0.006(10) 0.004(10) -0.005(10) 
O25 0.040(11) 0.051(12) 0.083(14) -0.016(10) -0.007(10) 0.012(9) 
O24 0.035(10) 0.066(12) 0.045(11) -0.002(9) -0.002(8) 0.015(9) 
O23 0.056(13) 0.102(16) 0.062(14) 0.013(12) -0.022(10) 0.002(11) 
O22 0.019(10) 0.053(11) 0.091(14) -0.007(10) 0.003(9) 0.010(8) 
O21 0.052(12) 0.068(13) 0.074(14) -0.042(11) -0.005(10) 0.003(10) 
O20 0.069(13) 0.055(12) 0.070(14) -0.013(10) 0.016(10) -0.015(10) 
O19 0.092(15) 0.061(13) 0.057(13) 0.008(10) 0.033(11) -0.005(11) 
O18 0.074(14) 0.132(18) 0.053(13) -0.023(12) 0.044(11) -0.059(13) 
O17 0.050(12) 0.028(10) 0.126(17) 0.009(10) 0.053(11) 0.009(9) 
O16 0.043(12) 0.062(13) 0.111(17) -0.037(12) 0.030(11) -0.012(10) 
O15 0.060(13) 0.121(17) 0.051(13) 0.001(12) 0.029(10) -0.012(12) 
O14 0.072(13) 0.044(11) 0.038(11) -0.012(9) 0.006(9) -0.001(9) 
O13 0.046(12) 0.062(13) 0.105(16) -0.037(12) -0.015(11) -0.006(10) 
O12 0.102(16) 0.073(14) 0.036(12) 0.019(10) 0.004(11) 0.013(12) 
O11 0.014(8) 0.030(9) 0.024(9) -0.020(7) -0.013(7) 0.000(7) 
O10 0.011(8) 0.025(8) 0.019(8) -0.001(7) 0.009(6) -0.007(6) 
O9 0.005(8) 0.063(11) 0.057(12) 0.000(9) 0.005(8) -0.013(8) 
O8 0.001(9) 0.091(15) 0.15(2) 0.037(14) -0.044(10) -0.017(9) 
C246 0.006 0.053 0.029 0.004 -0.006 -0.007 
C245 0.046 0.007 0.050 0.007 0.004 -0.015 
C244 0.062 0.026 0.027 -0.010 0.012 -0.041 
C243 0.023 0.083 0.023 0.016 0.028 0.010 
C242 0.025 0.089 0.012 0.009 -0.009 0.018 
C241 0.089 0.004 0.000 0.021 -0.013 0.005 
C240 0.050 0.031 0.042 0.038 -0.011 0.020 
C239 0.019 0.026 0.067 0.011 0.003 -0.024 
C238 0.063 0.062 0.028 0.015 -0.036 -0.005 
C237 0.018 0.073 0.058 0.001 -0.016 0.039 
C236 0.016 0.103 0.083 -0.014 -0.014 -0.048 
C235 0.069 0.105 0.027 0.036 -0.031 0.007 
C234 0.108 0.048 0.051 -0.037 0.020 0.036 
C233 0.072 0.021 0.054 -0.027 0.021 0.013 
C232 0.062 0.002 0.087 -0.025 -0.029 0.000 
C231 0.061 0.158 0.098 -0.053 -0.071 0.087 
C230 0.076 0.110 0.044 0.013 0.054 0.050 
C229 0.083 0.137 0.009 0.019 -0.041 0.001 
C228 0.073 0.115 0.066 -0.041 -0.015 0.090 
C227 0.007 0.043 0.196 0.048 0.040 0.018 
C226 0.029 0.061 0.348 0.137 -0.041 0.005 
C225 0.066 0.204 0.034 -0.034 0.046 0.020 
C224 0.181 0.078 0.029 0.041 -0.065 -0.027 
C223 0.195 0.068 0.160 -0.109 0.069 -0.073 
C222 0.061 0.046 0.229 -0.069 0.017 0.031 
C221 0.106 0.101 0.107 0.058 -0.103 -0.017 
C220 0.187 0.032 0.061 -0.028 0.015 -0.077 
C219 0.042 0.015 0.046 0.000 -0.001 0.021 
C218 0.202 0.047 0.058 0.024 0.066 -0.042 
C217 0.116 0.030 0.247 -0.091 -0.015 0.000 
C216 0.055 0.116 0.203 0.066 0.098 -0.022 
C215 0.009 0.240 0.087 0.023 0.030 0.056 
C214 0.041 0.207 0.169 0.029 0.052 0.078 
C213 0.406 0.004 0.145 -0.033 -0.149 -0.004 
C212 0.003 0.196 0.213 -0.041 0.031 -0.052 
C211 0.181 0.300 0.332 -0.292 0.191 -0.051 
C210 0.285 0.084 0.090 0.052 -0.065 -0.059 
O7 0.057 0.046 0.079 0.012 0.007 -0.020 
C209 0.010 0.040 0.060 0.007 0.000 0.018 
N50 0.050 0.143 0.053 0.006 -0.055 -0.010 
N49 0.115 0.257 0.086 -0.077 -0.040 0.155 
O6 0.131 0.031 0.107 0.041 -0.064 -0.035 
N48 0.073 0.057 0.253 0.048 0.080 0.018 
N47 0.100 0.121 0.064 0.003 -0.009 -0.036 
N46 0.100 0.083 0.123 -0.012 -0.075 0.016 
N45 0.132 0.071 0.151 -0.046 -0.068 0.013 
N44 0.123 0.165 0.084 -0.077 -0.026 0.067 
N43 0.285 0.044 0.087 0.039 0.018 0.073 
N42 0.237 0.089 0.068 0.030 -0.082 -0.083 
N41 0.039 0.381 0.134 -0.093 0.038 0.075 
C208 0.153 0.054 0.024 -0.008 0.006 0.068 
C207 0.044 0.032 0.225 0.021 -0.047 0.013 
C206 0.159 0.110 0.015 -0.021 0.022 -0.058 
C205 0.076 0.080 0.205 0.073 0.112 0.057 
C204 0.119 0.096 0.105 -0.044 -0.030 0.075 
C203 0.093 0.157 0.089 -0.076 -0.069 0.066 
C202 0.150 0.148 0.037 0.012 -0.035 -0.083 
C201 0.100 0.148 0.097 0.054 -0.012 -0.001 
C200 0.055 0.258 0.035 -0.001 0.012 0.021 
C199 0.160 0.125 0.019 0.025 -0.005 -0.075 
C198 0.053 0.150 0.150 0.084 -0.013 0.011 
C197 0.090 0.131 0.144 -0.094 0.095 -0.040 
N40 0.170 0.182 0.051 0.009 -0.001 -0.115 
C196 0.200 0.112 0.076 -0.051 0.055 -0.084 
C195 0.075 0.193 0.153 -0.151 0.042 -0.039 
C194 0.194 0.081 0.111 0.064 0.091 0.079 
C193 0.032 0.012 0.058 -0.014 0.014 -0.016 
C192 0.112 0.139 0.279 0.145 0.086 0.051 
C191 0.054 0.339 0.287 0.268 0.123 0.110 
C190 0.136 0.197 0.063 -0.062 -0.022 0.096 
C189 0.072 0.365 0.065 -0.083 -0.023 0.060 
C188 0.077 0.098 0.392 -0.133 -0.044 0.015 
C187 0.085 0.443 0.161 -0.080 0.098 -0.058 
C186 0.249 0.086 0.106 0.083 0.091 0.095 
C185 0.127 0.323 0.074 0.007 0.043 0.001 
C184 0.078 0.336 0.277 -0.245 0.048 -0.004 
C183 0.284 0.177 0.183 -0.170 0.155 -0.138 
C182 0.029 0.154 0.293 0.092 0.031 0.046 
C181 0.138 0.384 0.017 0.022 0.038 0.012 
C180 0.232 0.195 0.100 0.076 -0.118 -0.140 
N39 0.083 0.090 0.146 -0.045 -0.069 0.017 
C179 0.507 0.016 0.168 0.033 -0.196 0.013 
O5 0.084 0.103 0.078 0.048 0.040 0.018 
N38 0.056 0.027 0.078 0.012 0.005 -0.018 
N37 0.047 0.083 0.060 0.024 0.004 0.014 
C178 0.020 0.044 0.011 0.010 -0.001 0.012 
C177 0.063 0.023 0.055 -0.008 -0.016 0.002 
N36 0.076 0.025 0.051 -0.016 0.007 0.026 
N35 0.050 0.053 0.019 -0.016 0.020 -0.025 
C176 0.037 0.047 0.031 0.022 -0.003 -0.004 
C175 0.024 0.035 0.040 0.002 0.001 0.004 
C174 0.091 0.020 0.031 -0.008 -0.027 -0.014 
C173 0.036 0.054 0.064 0.007 -0.009 -0.005 
C172 0.024 0.034 0.051 0.000 0.011 -0.011 
N34 0.031 0.031 0.081 0.004 0.004 0.012 
N33 0.045 0.067 0.059 0.009 0.047 0.000 
C171 0.045 0.069 0.015 -0.007 0.007 0.014 
N32 0.082 0.120 0.051 -0.008 0.020 -0.065 
O4 0.060 0.044 0.065 -0.003 0.010 0.030 
N31 0.088 0.062 0.073 0.047 0.011 0.039 
C170 0.012 0.054 0.021 0.009 -0.004 0.002 
N30 0.049 0.048 0.029 0.001 -0.002 -0.008 
C169 0.042 0.029 0.036 -0.013 0.008 0.025 
C168 0.048 0.022 0.041 0.017 -0.019 -0.007 
C167 0.042 0.017 0.015 -0.015 -0.006 0.003 
C166 0.081 0.011 0.052 -0.005 -0.009 0.003 
N29 0.121 0.056 0.023 -0.012 -0.006 0.030 
C165 0.046 0.045 0.052 0.005 0.040 0.014 
C164 0.064 0.078 0.113 -0.011 0.013 -0.027 
N28 0.065 0.056 0.050 0.019 0.000 0.008 
C163 0.014 0.056 0.065 -0.011 0.020 0.014 
C162 0.025 0.046 0.067 0.018 0.012 0.012 
C161 0.043 0.045 0.038 -0.012 0.000 -0.015 
C160 0.053 0.046 0.033 0.022 0.015 0.008 
C159 0.022 0.039 0.031 -0.018 0.002 0.008 
C158 0.047 0.029 0.041 0.011 -0.020 0.009 
C157 0.027 0.058 0.083 -0.003 0.045 -0.001 
C156 0.017 0.023 0.055 0.008 0.013 -0.001 
C155 0.018 0.057 0.061 -0.004 0.014 -0.024 
N27 0.004 0.114 0.056 0.014 -0.003 0.009 
C154 0.019 0.030 0.070 0.032 0.024 0.004 
C153 0.079 0.031 0.033 -0.002 0.000 0.010 
C152 0.037 0.060 0.068 -0.005 -0.002 0.012 
C151 0.009 0.054 0.049 -0.007 0.007 0.012 
C150 0.046 0.035 0.115 -0.011 0.006 -0.028 
C149 0.057 0.038 0.026 -0.020 0.001 -0.005 
C148 0.108 0.033 0.023 0.002 -0.026 0.005 
C147 0.086 0.015 0.109 0.015 -0.025 -0.026 
C146 0.073 0.010 0.102 0.008 -0.033 0.003 
C145 0.060 0.016 0.113 0.023 -0.015 -0.013 
C144 0.051 0.038 0.011 -0.005 -0.003 0.011 
C143 0.040 0.042 0.073 0.030 0.018 0.023 
C142 0.082 0.028 0.045 0.022 0.017 0.012 
C141 0.049 0.046 0.074 -0.028 -0.021 0.043 
C140 0.093 0.063 0.035 0.020 0.015 0.023 
C139 0.031 0.058 0.065 -0.024 0.032 -0.029 
C138 0.042 0.052 0.054 -0.017 0.009 -0.038 
C137 0.049 0.025 0.052 0.029 -0.008 0.003 
C136 0.063 0.029 0.079 -0.014 -0.010 -0.007 
C135 0.057 0.061 0.063 0.000 -0.014 0.008 
C134 0.017 0.045 0.037 -0.001 0.010 -0.014 
C133 0.062 0.056 0.083 0.014 -0.004 -0.019 
C132 0.022 0.134 0.069 0.019 0.003 0.011 
C131 0.057 0.026 0.038 -0.022 -0.009 0.024 
C130 0.048 0.043 0.024 0.005 -0.005 -0.023 
C129 0.044 0.043 0.087 -0.001 -0.039 -0.001 
C128 0.044 0.063 0.073 -0.002 0.032 0.010 
C127 0.054 0.052 0.032 0.001 -0.033 0.004 
C126 0.046 0.033 0.109 -0.017 0.026 -0.005 
C125 0.038 0.057 0.036 -0.018 0.011 -0.002 
C124 0.063 0.031 0.033 -0.009 -0.014 -0.004 
C123 0.076 0.096 0.032 0.040 -0.035 -0.046 
C122 0.055 0.044 0.074 -0.010 -0.009 -0.021 
C121 0.056 0.037 0.108 0.017 0.006 0.016 
C120 0.061 0.080 0.042 -0.012 -0.014 -0.025 
N26 0.066 0.115 0.037 -0.004 -0.017 0.016 
N25 0.066 0.047 0.073 0.020 0.003 -0.014 
C119 0.038 0.057 0.024 -0.018 -0.014 0.003 
N24 0.073 0.085 0.053 -0.008 0.013 -0.021 
N23 0.111 0.124 0.054 0.025 -0.011 0.019 
C118 0.025 0.072 0.058 -0.029 0.028 -0.018 
C117 0.064 0.029 0.037 -0.016 0.004 0.003 
C116 0.082 0.047 0.031 0.001 -0.036 0.032 
C115 0.030 0.041 0.044 0.026 0.017 0.017 
C114 0.026 0.076 0.066 -0.004 0.006 0.030 
C113 0.014 0.042 0.072 -0.003 -0.015 0.004 
C112 0.003 0.057 0.105 -0.005 -0.008 -0.001 
C111 0.057 0.008 0.061 -0.009 0.007 -0.015 
C110 0.057 0.066 0.034 0.028 0.010 0.023 
C109 0.064 0.068 0.083 0.011 0.008 0.044 
C108 0.027 0.092 0.078 -0.059 -0.031 0.026 
C107 0.037 0.078 0.061 -0.004 -0.004 -0.017 
C106 0.062 0.102 0.039 -0.024 -0.035 0.016 
C105 0.064 0.042 0.042 -0.020 -0.011 -0.009 
C104 0.059 0.042 0.145 -0.031 -0.015 0.006 
C103 0.030 0.052 0.092 -0.014 -0.013 0.010 
O3 0.114 0.024 0.065 -0.022 0.017 -0.012 
N22 0.033 0.085 0.045 -0.013 0.004 0.017 
C102 0.062 0.044 0.057 -0.009 0.000 0.012 
C101 0.083 0.101 0.015 -0.036 0.011 -0.010 
C100 0.140 0.066 0.020 -0.012 -0.014 -0.025 
C99 0.040 0.087 0.071 -0.006 -0.016 0.007 
C98 0.132 0.065 0.029 0.003 0.044 -0.008 
C97 0.035 0.097 0.072 -0.025 0.009 -0.033 
C96 0.081 0.070 0.034 -0.011 -0.005 0.027 
C95 0.043 0.055 0.070 0.039 0.009 -0.021 
C94 0.089 0.091 0.024 0.006 0.008 -0.057 
C93 0.048 0.072 0.064 0.033 -0.026 -0.015 
C92 0.042 0.041 0.131 -0.001 0.015 0.017 
C91 0.151 0.041 0.061 0.004 0.021 0.015 
C90 0.108 0.045 0.103 -0.024 -0.015 0.016 
C89 0.121 0.050 0.054 0.023 0.052 0.065 
C88 0.035 0.096 0.072 0.018 0.023 -0.017 
N21 0.018 0.066 0.109 -0.034 0.018 0.003 
C87 0.044 0.067 0.029 -0.006 -0.013 0.030 
N20 0.066 0.144 0.063 -0.014 0.001 -0.046 
N19 0.074 0.083 0.050 0.000 -0.027 0.005 
N18 0.051 0.163 0.057 -0.007 0.026 0.062 
N17 0.123 0.081 0.040 -0.024 -0.049 -0.007 
C86 0.054 0.032 0.083 -0.015 -0.011 -0.015 
C85 0.085 0.074 0.053 0.012 -0.003 0.041 
C84 0.057 0.071 0.068 -0.010 -0.011 0.031 
C83 0.076 0.079 0.062 0.004 0.028 0.032 
C82 0.061 0.060 0.057 -0.007 -0.016 0.003 
C81 0.072 0.055 0.081 0.031 0.026 -0.008 
C80 0.026 0.081 0.075 0.017 0.009 0.016 
C79 0.016 0.120 0.108 -0.040 -0.007 -0.008 
N16 0.129 0.057 0.025 -0.007 -0.011 0.023 
C78 0.069 0.101 0.119 -0.007 -0.023 0.007 
C77 0.107 0.085 0.061 -0.023 -0.005 0.027 
C76 0.101 0.080 0.024 -0.007 -0.040 0.003 
C75 0.071 0.092 0.038 -0.014 -0.017 0.015 
C74 0.055 0.062 0.066 0.003 0.012 0.023 
C73 0.101 0.016 0.122 -0.002 -0.013 -0.008 
C72 0.075 0.128 0.050 0.001 0.038 0.020 
C71 0.034 0.083 0.122 0.037 -0.008 -0.023 
N15 0.035 0.049 0.137 0.046 0.041 0.002 
O2 0.100 0.091 0.121 -0.013 0.029 -0.034 
N14 0.106 0.098 0.055 0.041 0.011 -0.015 
N13 0.102 0.055 0.127 0.017 0.035 -0.027 
N12 0.105 0.076 0.119 0.029 0.020 0.058 
N11 0.121 0.130 0.089 0.020 0.051 0.063 
C70 0.082 0.077 0.117 -0.021 0.081 -0.023 
N10 0.123 0.102 0.145 -0.045 0.050 0.046 
C69 0.065 0.094 0.091 0.024 -0.027 -0.061 
C68 0.080 0.071 0.102 0.039 -0.009 0.016 
N9 0.114 0.076 0.170 0.005 0.043 -0.014 
C67 0.087 0.089 0.045 -0.025 0.020 0.064 
C66 0.110 0.054 0.065 -0.028 0.000 -0.045 
C65 0.089 0.048 0.100 -0.016 0.034 0.003 
C64 0.087 0.085 0.048 0.016 -0.032 -0.020 
N8 0.177 0.072 0.205 -0.010 0.074 0.025 
C63 0.059 0.053 0.109 -0.021 -0.011 0.013 
C62 0.052 0.090 0.059 -0.007 -0.022 -0.001 
C61 0.047 0.095 0.061 0.020 0.019 -0.034 
C60 0.033 0.176 0.060 -0.033 -0.029 0.030 
C59 0.061 0.083 0.090 -0.033 -0.030 -0.013 
C58 0.093 0.091 0.090 -0.018 -0.007 -0.027 
C57 0.137 0.035 0.103 0.024 0.021 -0.010 
C56 0.084 0.099 0.051 0.026 -0.032 -0.009 
C55 0.104 0.072 0.021 -0.008 -0.005 0.016 
C54 0.084 0.100 0.055 0.015 0.028 -0.043 
C53 0.078 0.181 0.047 0.041 0.025 -0.037 
C52 0.131 0.092 0.083 0.051 0.006 0.053 
C51 0.092 0.072 0.140 -0.038 -0.022 -0.007 
C50 0.123 0.039 0.076 0.034 0.006 -0.003 
C49 0.110 0.073 0.081 -0.002 0.027 0.044 
C48 0.068 0.067 0.143 0.034 -0.032 -0.014 
C47 0.140 0.029 0.153 0.037 -0.005 -0.016 
C46 0.131 0.091 0.067 0.031 0.048 -0.008 
C45 0.108 0.056 0.111 -0.002 0.013 0.052 
C44 0.030 0.152 0.132 -0.006 -0.025 -0.041 
C43 0.052 0.117 0.138 -0.024 0.035 0.031 
C42 0.052 0.107 0.105 -0.023 0.025 0.001 
C41 0.088 0.079 0.164 -0.018 0.036 -0.010 
C40 0.070 0.116 0.161 0.029 -0.014 -0.033 
C39 0.060 0.067 0.146 -0.015 0.022 -0.028 
C38 0.101 0.086 0.096 -0.002 -0.014 0.010 
C37 0.113 0.135 0.124 -0.051 0.038 0.006 
C36 0.103 0.101 0.113 -0.033 0.022 0.003 
O1 0.136 0.156 0.111 -0.019 -0.012 0.028 
N7 0.131 0.098 0.139 0.013 -0.011 0.088 
C35 0.085 0.103 0.093 0.010 0.040 -0.026 
N6 0.249 0.073 0.153 0.031 -0.011 0.020 
N5 0.069 0.256 0.176 -0.066 0.027 -0.022 
C34 0.073 0.125 0.051 0.000 -0.026 -0.046 
N4 0.139 0.160 0.252 -0.035 0.066 -0.037 
C33 0.109 0.041 0.110 0.004 0.048 0.017 
N3 0.213 0.149 0.077 -0.058 0.029 -0.012 
C32 0.062 0.149 0.073 -0.031 0.008 0.017 
C31 0.081 0.150 0.159 -0.068 0.033 -0.074 
C30 0.144 0.131 0.120 -0.001 0.045 -0.069 
C29 0.089 0.141 0.215 0.025 0.088 0.019 
C28 0.075 0.114 0.141 0.034 0.047 -0.010 
C27 0.086 0.086 0.158 -0.001 -0.023 -0.035 
C26 0.112 0.095 0.203 -0.071 -0.032 -0.014 
C25 0.103 0.105 0.094 0.025 -0.041 -0.016 
C24 0.183 0.137 0.112 0.004 0.042 0.048 
C23 0.213 0.082 0.161 -0.105 0.056 -0.027 
C22 0.052 0.125 0.196 -0.068 0.057 0.008 
C21 0.095 0.158 0.104 0.023 0.020 -0.020 
C20 0.041 0.201 0.188 -0.049 -0.013 0.043 
C19 0.055 0.202 0.199 -0.037 0.036 0.050 
C18 0.236 0.088 0.091 -0.035 -0.065 -0.058 
C17 0.157 0.073 0.134 -0.041 0.062 -0.040 
C16 0.271 0.153 0.130 0.021 0.056 0.016 
C15 0.022 0.192 0.252 0.070 0.021 -0.021 
C14 0.029 0.136 0.223 -0.033 0.036 -0.017 
C13 0.323 0.199 0.490 -0.237 0.099 -0.061 
C12 0.136 0.178 0.153 -0.084 -0.001 0.083 
C11 0.146 0.208 0.133 0.022 0.042 -0.091 
C10 0.202 0.149 0.183 -0.099 0.025 -0.032 
C9 0.378 0.181 0.288 -0.056 0.185 0.051 
C8 0.222 0.167 0.216 0.003 0.076 -0.151 
N2 0.586 0.305 0.503 0.067 -0.291 0.103 
C7 0.057 0.024 0.319 0.050 -0.055 -0.021 
O1W 0.081 0.082 0.051 0.022 0.016 0.001 
O2W 0.106 0.051 0.056 -0.008 0.017 -0.023 
O3W 0.070 0.146 0.060 0.001 0.013 0.038 
O4W 0.076 0.090 0.084 0.026 0.040 -0.003 
O5W 0.086 0.099 0.101 0.008 0.034 0.002 
O6W 0.096 0.092 0.145 0.055 0.006 -0.017 
C6 0.059 0.081 0.836 0.129 0.000 -0.027 
O21W 0.120 0.085 0.155 0.012 0.052 0.024 
O20W 0.141 0.130 0.084 0.033 0.005 -0.020 
O19W 0.139 0.091 0.119 0.002 -0.021 -0.022 
O18W 0.081 0.115 0.189 -0.038 0.013 -0.022 
O17W 0.151 0.154 0.099 -0.016 -0.001 0.025 
O16W 0.186 0.128 0.117 -0.013 0.001 -0.035 
O15W 0.103 0.143 0.237 -0.004 -0.022 -0.040 
O14W 0.181 0.172 0.101 -0.026 0.012 -0.002 
O13W 0.131 0.169 0.171 0.054 0.000 0.014 
O12W 0.254 0.079 0.220 0.014 0.046 -0.031 
O11W 0.257 0.191 0.114 0.034 0.118 0.001 
O10W 0.186 0.129 0.190 -0.004 0.012 -0.001 
O9W 0.348 0.276 0.212 -0.030 0.111 0.006 
O8W 0.219 0.181 0.268 -0.023 0.029 -0.028 
O7W 0.226 0.233 0.266 -0.019 -0.026 -0.072 
C5 0.277 0.245 0.262 0.083 -0.085 -0.024 
C4 0.174 0.322 0.384 0.370 -0.039 -0.024 
C3 0.378 0.047 0.299 0.100 -0.221 0.004 
C2 0.291 0.931 0.350 -0.546 -0.313 0.490 
N1 0.481 0.155 0.267 -0.004 -0.080 0.208 
C1 0.214 0.350 0.206 -0.174 -0.041 -0.081 
 
_geom_special_details 
; 
 All esds (except the esd in the dihedral angle between two l.s. planes) 
 are estimated using the full covariance matrix.  The cell esds are taken 
 into account individually in the estimation of esds in distances, angles 
 and torsion angles; correlations between esds in cell parameters are only 
 used when they are defined by crystal symmetry.  An approximate (isotropic) 
 treatment of cell esds is used for estimating esds involving l.s. planes. 
; 
 
loop_ 
 _geom_bond_atom_site_label_1 
 _geom_bond_atom_site_label_2 
 _geom_bond_distance 
 _geom_bond_site_symmetry_2 
 _geom_bond_publ_flag 
Dy1 O141 2.327(12) . ? 
Dy1 O121 2.369(12) . ? 
Dy1 O99 2.380(14) . ? 
Dy1 O10 2.382(12) . ? 
Dy1 O108 2.395(13) . ? 
Dy1 O127 2.398(14) . ? 
Dy1 O159 2.398(12) . ? 
Dy1 O133 2.407(12) . ? 
Dy1 Dy4 3.7375(16) . ? 
Dy1 Dy2 3.8265(16) . ? 
Dy1 Dy3 3.8474(17) . ? 
Dy1 Dy21 3.8797(17) . ? 
Dy10 O101 2.315(12) . ? 
Dy10 O158 2.360(12) . ? 
Dy10 O56 2.366(15) . ? 
Dy10 O107 2.367(13) . ? 
Dy10 O152 2.367(12) . ? 
Dy10 O156 2.375(14) . ? 
Dy10 O154 2.376(13) . ? 
Dy10 O124 2.390(13) . ? 
Dy10 Dy11 3.7336(17) . ? 
Dy10 Dy12 3.7697(17) . ? 
Dy10 Dy9 3.7895(17) . ? 
Dy10 Dy13 3.8455(16) . ? 
Dy3 O110 2.343(13) . ? 
Dy3 O117 2.347(13) . ? 
Dy3 O141 2.353(12) . ? 
Dy3 O62 2.359(13) . ? 
Dy3 O145 2.372(13) . ? 
Dy3 O142 2.373(13) . ? 
Dy3 O159 2.405(12) . ? 
Dy3 O82 2.425(13) . ? 
Dy3 Dy2 3.7349(16) . ? 
Dy3 Dy4 3.7548(16) . ? 
Dy3 Dy7 3.8513(16) . ? 
Dy5 O5 2.2969(11) . ? 
Dy5 O111 2.323(12) . ? 
Dy5 O135 2.341(12) . ? 
Dy5 O91 2.353(13) . ? 
Dy5 O144 2.362(12) . ? 
Dy5 O120 2.373(13) . ? 
Dy5 O150 2.436(13) . ? 
Dy5 O126 2.444(12) . ? 
Dy5 Dy7 3.7027(17) . ? 
Dy5 Dy6 3.8022(17) . ? 
Dy5 Dy25 3.8846(17) . ? 
Dy5 Dy15 3.9331(16) . ? 
Dy17 O64 2.324(14) . ? 
Dy17 O118 2.340(13) . ? 
Dy17 O138 2.341(13) . ? 
Dy17 O147 2.350(13) . ? 
Dy17 O155 2.388(13) . ? 
Dy17 O114 2.398(13) . ? 
Dy17 O128 2.400(15) . ? 
Dy17 O148 2.413(12) . ? 
Dy17 Dy19 3.7105(17) . ? 
Dy17 Dy20 3.7829(17) . ? 
Dy17 Dy18 3.8231(18) . ? 
Dy17 Dy12 3.8552(16) . ? 
Dy18 O90 2.336(14) . ? 
Dy18 O130 2.344(14) . ? 
Dy18 O132 2.347(13) . ? 
Dy18 O118 2.358(13) . ? 
Dy18 O157 2.399(13) . ? 
Dy18 O11 2.424(13) . ? 
Dy18 O147 2.432(12) . ? 
Dy18 O45 2.461(14) . ? 
Dy18 Dy19 3.7165(16) . ? 
Dy18 Dy20 3.7526(17) . ? 
Dy18 Dy6 3.8720(17) . ? 
Dy2 O42 2.263(14) . ? 
Dy2 O60 2.298(15) . ? 
Dy2 O24 2.347(15) . ? 
Dy2 O121 2.363(13) . ? 
Dy2 O117 2.373(13) . ? 
Dy2 O119 2.420(13) . ? 
Dy2 O141 2.489(13) . ? 
Dy2 O30 2.512(15) . ? 
Dy2 Dy4 3.8678(17) . ? 
Dy4 O140 2.317(12) . ? 
Dy4 O159 2.317(12) . ? 
Dy4 O54 2.327(15) . ? 
Dy4 O80 2.346(14) . ? 
Dy4 O121 2.369(12) . ? 
Dy4 O137 2.374(13) . ? 
Dy4 O117 2.387(12) . ? 
Dy4 O125 2.571(13) . ? 
Dy15 O150 2.343(13) . ? 
Dy15 O115 2.346(13) . ? 
Dy15 O153 2.350(12) . ? 
Dy15 O143 2.357(13) . ? 
Dy15 O126 2.367(13) . ? 
Dy15 O149 2.379(12) . ? 
Dy15 O74 2.410(14) . ? 
Dy15 O81 2.437(13) . ? 
Dy15 Dy14 3.7324(16) . ? 
Dy15 Dy16 3.7749(17) . ? 
Dy15 Dy13 3.8130(17) . ? 
Dy12 O33 2.317(16) . ? 
Dy12 O158 2.342(12) . ? 
Dy12 O148 2.366(12) . ? 
Dy12 O85 2.377(13) . ? 
Dy12 O151 2.388(13) . ? 
Dy12 O114 2.404(13) . ? 
Dy12 O124 2.405(13) . ? 
Dy12 O52 2.458(14) . ? 
Dy12 Dy9 3.7480(16) . ? 
Dy12 Dy11 3.7950(17) . ? 
Dy8 O134 2.319(13) . ? 
Dy8 O35 2.369(14) . ? 
Dy8 O27 2.386(15) . ? 
Dy8 O144 2.432(12) . ? 
Dy8 O39 2.448(16) . ? 
Dy8 O120 2.451(13) . ? 
Dy8 O7 2.4632(12) . ? 
Dy8 O96 2.493(14) . ? 
Dy8 O49 2.545(16) . ? 
Dy8 C209 2.8049(12) . ? 
Dy8 C173 2.8711(12) . ? 
Dy8 Dy6 3.7165(17) . ? 
Dy14 O43 2.288(14) . ? 
Dy14 O149 2.314(12) . ? 
Dy14 O122 2.347(13) . ? 
Dy14 O104 2.355(13) . ? 
Dy14 O65 2.389(14) . ? 
Dy14 O115 2.394(14) . ? 
Dy14 O139 2.405(13) . ? 
Dy14 O9 2.479(14) . ? 
Dy14 Dy13 3.7285(17) . ? 
Dy14 Dy16 3.8974(17) . ? 
Dy7 O135 2.311(13) . ? 
Dy7 O37 2.313(13) . ? 
Dy7 O109 2.324(12) . ? 
Dy7 O144 2.360(13) . ? 
Dy7 O134 2.370(13) . ? 
Dy7 O145 2.395(13) . ? 
Dy7 O103 2.435(14) . ? 
Dy7 O142 2.439(13) . ? 
Dy7 Dy6 3.7603(17) . ? 
Dy19 O147 2.312(13) . ? 
Dy19 O72 2.344(15) . ? 
Dy19 O73 2.349(14) . ? 
Dy19 O138 2.351(13) . ? 
Dy19 O112 2.356(14) . ? 
Dy19 O130 2.369(13) . ? 
Dy19 O98 2.423(14) . ? 
Dy19 O100 2.657(14) . ? 
Dy19 Dy20 3.9253(18) . ? 
Dy25 O59 2.291(16) . ? 
Dy25 O6 2.3309(12) . ? 
Dy25 O150 2.356(13) . ? 
Dy25 O15 2.363(16) . ? 
Dy25 O81 2.386(14) . ? 
Dy25 O111 2.387(13) . ? 
Dy25 O70 2.427(14) . ? 
Dy25 O140 2.480(13) . ? 
Dy25 N30 2.8629(11) . ? 
Dy22 O41 2.314(16) . ? 
Dy22 O110 2.341(14) . ? 
Dy22 O21 2.395(16) . ? 
Dy22 O109 2.402(14) . ? 
Dy22 O145 2.408(13) . ? 
Dy22 O69 2.409(15) . ? 
Dy22 O47 2.420(15) . ? 
Dy22 O112 2.477(13) . ? 
Dy22 C162 2.6901(12) . ? 
Dy22 O100 2.819(14) . ? 
Dy22 N33 2.8508(12) . ? 
Dy11 O124 2.321(12) . ? 
Dy11 O87 2.353(15) . ? 
Dy11 O66 2.361(15) . ? 
Dy11 O151 2.383(14) . ? 
Dy11 O17 2.390(15) . ? 
Dy11 O152 2.390(12) . ? 
Dy11 O48 2.409(16) . ? 
Dy11 O28 2.465(17) . ? 
Dy11 C146 2.7771(12) . ? 
Dy11 Dy9 3.8628(16) . ? 
Dy24 O71 2.297(16) . ? 
Dy24 O113 2.337(14) . ? 
Dy24 O97 2.357(13) . ? 
Dy24 O157 2.359(12) . ? 
Dy24 O132 2.373(13) . ? 
Dy24 O104 2.450(14) . ? 
Dy24 O61 2.461(14) . ? 
Dy24 O3 2.4648(12) . ? 
Dy24 O9 2.775(15) . ? 
Dy24 C232 2.7970(13) . ? 
Dy24 N38 2.8524(13) . ? 
Dy24 Dy6 3.8704(17) . ? 
Dy6 O97 2.279(13) . ? 
Dy6 O146 2.338(13) . ? 
Dy6 O134 2.344(12) . ? 
Dy6 O84 2.364(13) . ? 
Dy6 O11 2.376(13) . ? 
Dy6 O135 2.380(13) . ? 
Dy6 O120 2.387(13) . ? 
Dy6 O157 2.428(12) . ? 
Dy16 O8 2.291(15) . ? 
Dy16 O115 2.351(13) . ? 
Dy16 O153 2.367(13) . ? 
Dy16 O67 2.380(14) . ? 
Dy16 O93 2.382(16) . ? 
Dy16 O16 2.384(16) . ? 
Dy16 O122 2.387(12) . ? 
Dy16 O13 2.466(16) . ? 
Dy16 Dy13 3.7315(16) . ? 
Dy9 O105 2.339(12) . ? 
Dy9 O158 2.342(12) . ? 
Dy9 O152 2.364(12) . ? 
Dy9 O88 2.369(14) . ? 
Dy9 O94 2.376(14) . ? 
Dy9 O10 2.379(12) . ? 
Dy9 O151 2.387(13) . ? 
Dy9 O133 2.442(13) . ? 
Dy26 O75 2.279(14) . ? 
Dy26 O123 2.317(14) . ? 
Dy26 O156 2.376(12) . ? 
Dy26 O101 2.378(13) . ? 
Dy26 O40 2.417(16) . ? 
Dy26 O53 2.432(15) . ? 
Dy26 O29 2.453(17) . ? 
Dy26 O137 2.473(12) . ? 
Dy26 O125 2.640(14) . ? 
Dy26 C84 2.7692(12) . ? 
Dy26 N32 2.8847(12) . ? 
Dy26 N29 2.9254(12) . ? 
Dy29 O92 2.351(14) . ? 
Dy29 O76 2.361(14) . ? 
Dy29 O63 2.363(14) . ? 
Dy29 O131 2.365(13) . ? 
Dy29 O116 2.384(13) . ? 
Dy29 O25 2.399(16) . ? 
Dy29 O102 2.455(16) . ? 
Dy29 N36 2.7113(12) . ? 
Dy29 Dy30 3.7580(18) . ? 
Dy29 Dy27 3.7800(17) . ? 
Dy29 Dy28 3.8527(18) . ? 
Dy13 O123 2.317(13) . ? 
Dy13 O122 2.350(13) . ? 
Dy13 O154 2.369(13) . ? 
Dy13 O106 2.382(15) . ? 
Dy13 O153 2.386(13) . ? 
Dy13 O149 2.398(12) . ? 
Dy13 O22 2.422(15) . ? 
Dy13 O156 2.434(13) . ? 
Dy21 O32 2.259(15) . ? 
Dy21 O108 2.369(13) . ? 
Dy21 O133 2.379(13) . ? 
Dy21 O89 2.386(15) . ? 
Dy21 O105 2.395(13) . ? 
Dy21 O26 2.450(16) . ? 
Dy21 O36 2.460(16) . ? 
Dy21 O98 2.472(14) . ? 
Dy21 O100 2.676(14) . ? 
Dy21 C155 2.7616(12) . ? 
Dy21 N28 2.8134(12) . ? 
Dy21 N27 2.8920(13) . ? 
Dy23 O129 2.253(14) . ? 
Dy23 O50 2.304(14) . ? 
Dy23 O155 2.358(13) . ? 
Dy23 O85 2.379(13) . ? 
Dy23 O148 2.381(12) . ? 
Dy23 O31 2.413(15) . ? 
Dy23 O139 2.473(13) . ? 
Dy23 O12 2.527(18) . ? 
Dy23 C125 2.7860(12) . ? 
Dy23 N34 2.8850(13) . ? 
Dy27 O14 2.306(15) . ? 
Dy27 O68 2.325(15) . ? 
Dy27 O131 2.345(13) . ? 
Dy27 O136 2.392(14) . ? 
Dy27 O57 2.396(15) . ? 
Dy27 O116 2.410(13) . ? 
Dy27 O19 2.424(16) . ? 
Dy27 N35 2.5761(12) . ? 
Dy27 Dy30 3.7314(17) . ? 
Dy27 Dy28 3.7940(18) . ? 
Dy28 O136 2.320(14) . ? 
Dy28 O77 2.338(16) . ? 
Dy28 O116 2.352(14) . ? 
Dy28 O46 2.358(17) . ? 
Dy28 O92 2.367(13) . ? 
Dy28 O38 2.376(15) . ? 
Dy28 O34 2.434(16) . ? 
Dy28 O95 2.585(16) . ? 
Dy28 Dy30 3.8273(18) . ? 
Dy20 O18 2.271(17) . ? 
Dy20 O78 2.312(16) . ? 
Dy20 O130 2.372(13) . ? 
Dy20 O79 2.379(15) . ? 
Dy20 O118 2.428(13) . ? 
Dy20 O138 2.463(13) . ? 
Dy20 O51 2.469(15) . ? 
Dy20 O55 2.470(14) . ? 
Dy30 O44 2.285(15) . ? 
Dy30 O23 2.298(17) . ? 
Dy30 O86 2.330(15) . ? 
Dy30 O131 2.342(14) . ? 
Dy30 O136 2.393(14) . ? 
Dy30 O83 2.407(15) . ? 
Dy30 O92 2.422(14) . ? 
Dy30 O20 2.571(17) . ? 
O155 N37 1.324(12) . ? 
O154 N34 1.291(12) . ? 
O146 C172 1.267(13) . ? 
O143 C165 1.260(13) . ? 
O142 N30 1.263(12) . ? 
O140 N30 1.335(13) . ? 
O139 N34 1.300(12) . ? 
O137 N29 1.309(13) . ? 
O132 N37 1.299(12) . ? 
O129 C174 1.298(15) . ? 
O128 C151 1.255(14) . ? 
O127 C193 1.241(14) . ? 
O126 N38 1.298(13) . ? 
O125 N32 1.322(13) . ? 
O123 N32 1.277(13) . ? 
O114 N28 1.330(12) . ? 
O112 N33 1.312(13) . ? 
O111 N30 1.290(12) . ? 
O110 N27 1.306(12) . ? 
O109 N33 1.273(13) . ? 
O108 N27 1.283(11) . ? 
O107 C219 1.216(13) . ? 
O106 C126 1.236(14) . ? 
O105 N28 1.247(12) . ? 
O104 N38 1.340(13) . ? 
O103 C178 1.266(13) . ? 
O101 N29 1.338(12) . ? 
O100 N27 1.318(13) . ? 
O99 C167 1.297(14) . ? 
O98 N28 1.311(13) . ? 
O97 N38 1.295(12) . ? 
O96 C173 1.282(15) . ? 
O94 C167 1.203(14) . ? 
O91 C156 1.241(13) . ? 
O90 C233 1.247(14) . ? 
O87 C158 1.306(16) . ? 
O86 C115 1.281(14) . ? 
O85 N34 1.307(13) . ? 
O84 C175 1.275(14) . ? 
O82 C178 1.270(13) . ? 
O81 N32 1.298(13) . ? 
O80 C245 1.312(15) . ? 
O79 C233 1.235(14) . ? 
O78 C111 1.306(16) . ? 
O77 C177 1.258(15) . ? 
O76 C143 1.251(15) . ? 
O75 C245 1.231(13) . ? 
O74 C156 1.276(14) . ? 
O73 C157 1.243(15) . ? 
O72 C61 1.250(15) . ? 
O71 C169 1.273(16) . ? 
O69 C162 1.227(16) . ? 
O68 C143 1.314(16) . ? 
O67 C165 1.227(14) . ? 
O66 C244 1.235(15) . ? 
O65 C169 1.236(15) . ? 
O64 C111 1.206(13) . ? 
O63 C177 1.241(14) . ? 
O62 C130 1.239(15) . ? 
O61 C232 1.295(14) . ? 
O60 C154 1.325(15) . ? 
O59 C153 1.311(16) . ? 
O58 C174 1.248(14) . ? 
O57 C115 1.241(15) . ? 
O56 C244 1.252(14) . ? 
O54 C153 1.181(15) . ? 
O52 C151 1.243(14) . ? 
O50 C134 1.265(15) . ? 
O49 C173 1.246(16) . ? 
O48 C146 1.300(16) . ? 
O46 C56 1.302(16) . ? 
O45 C175 1.211(14) . ? 
O44 C88 1.215(15) . ? 
O43 C134 1.222(14) . ? 
O42 C193 1.284(14) . ? 
O41 C157 1.228(16) . ? 
O40 C84 1.187(16) . ? 
O39 C209 1.240(16) . ? 
O38 C142 1.283(15) . ? 
O37 C144 1.213(14) . ? 
O36 C155 1.284(16) . ? 
O35 C172 1.246(14) . ? 
O33 C158 1.213(14) . ? 
O32 C61 1.219(16) . ? 
O31 C125 1.275(17) . ? 
O29 C84 1.317(16) . ? 
O28 C146 1.245(16) . ? 
O27 C144 1.280(15) . ? 
O26 C155 1.205(16) . ? 
O25 C88 1.239(15) . ? 
O24 C130 1.257(15) . ? 
O23 C56 1.188(18) . ? 
O22 C219 1.303(16) . ? 
O21 C162 1.220(16) . ? 
O18 C36 1.190(15) . ? 
O16 C126 1.270(17) . ? 
O14 C142 1.220(16) . ? 
O12 C125 1.183(16) . ? 
O11 N33 1.294(12) . ? 
O10 N29 1.246(11) . ? 
O9 N37 1.292(13) . ? 
O8 C35 1.196(15) . ? 
C246 C145 1.3477 . ? 
C246 C164 1.4293 . ? 
C246 C178 1.5153 . ? 
C245 C140 1.5020 . ? 
C244 C243 1.5045 . ? 
C243 C89 1.2922 . ? 
C243 C72 1.3660 . ? 
C242 C170 1.3764 . ? 
C242 C80 1.3831 . ? 
C241 C240 1.3171 . ? 
C241 C238 1.4066 . ? 
C241 C174 1.5188 . ? 
C240 C65 1.3212 . ? 
C239 C71 1.3499 . ? 
C239 C116 1.3906 . ? 
C239 C134 1.5787 . ? 
C238 C85 1.4144 . ? 
C237 C231 1.3130 . ? 
C237 C114 1.3761 . ? 
C237 C144 1.5444 . ? 
C236 C138 1.3896 . ? 
C236 C21 1.4143 . ? 
C235 N23 1.3611 . ? 
C235 C123 1.3980 . ? 
C234 C49 1.3901 . ? 
C234 C159 1.3933 . ? 
C233 C141 1.5888 . ? 
C232 O3 1.2269 . ? 
C232 C100 1.5481 . ? 
C231 C223 1.3063 . ? 
C230 C225 1.3485 . ? 
C230 C140 1.4710 . ? 
C229 C140 1.3116 . ? 
C229 C202 1.4759 . ? 
C228 C208 1.4361 . ? 
C228 C217 1.4482 . ? 
C228 C84 1.5263 . ? 
C227 N15 1.2522 . ? 
C227 C205 1.3946 . ? 
C226 C6 1.3289 . ? 
C226 C207 1.3765 . ? 
C225 N47 1.2695 . ? 
C224 C68 1.3338 . ? 
C224 C180 1.4679 . ? 
C223 N12 1.3499 . ? 
C222 C103 1.3694 . ? 
C222 C214 1.4235 . ? 
C221 N20 1.2939 . ? 
C221 C107 1.4469 . ? 
C220 C166 1.3357 . ? 
C220 C46 1.3959 . ? 
C219 C207 1.4776 . ? 
C218 C30 1.3946 . ? 
C218 C95 1.4115 . ? 
C217 C188 1.3127 . ? 
C216 C81 1.3432 . ? 
C216 C192 1.3672 . ? 
C215 C19 1.2636 . ? 
C215 C189 1.4804 . ? 
C215 C35 1.4939 . ? 
C214 N8 1.3185 . ? 
C213 N6 1.2878 . ? 
C213 C18 1.4790 . ? 
C212 C10 1.1310 . ? 
C212 C70 1.4151 . ? 
C211 C13 1.3405 . ? 
C211 C197 1.4011 . ? 
C210 C100 1.3823 . ? 
C210 C179 1.4146 . ? 
O7 C209 1.2469 . ? 
C209 C92 1.5699 . ? 
N50 C34 1.3182 . ? 
N50 C75 1.3379 . ? 
N49 C201 1.3805 . ? 
N49 C188 1.4447 . ? 
O6 C7 1.6822 . ? 
N48 C40 1.3178 . ? 
N48 C17 1.3355 . ? 
N47 C202 1.2821 . ? 
N46 C90 1.3177 . ? 
N46 C51 1.3978 . ? 
N45 C190 1.3485 . ? 
N45 C78 1.4012 . ? 
N44 C20 1.1404 . ? 
N44 C24 1.3414 . ? 
N43 C186 1.3282 . ? 
N43 C57 1.4676 . ? 
N42 C25 1.2490 . ? 
N42 C180 1.3069 . ? 
N41 C181 1.3706 . ? 
N41 C185 1.4288 . ? 
C208 C201 1.3975 . ? 
C207 C15 1.4480 . ? 
C206 C53 1.4178 . ? 
C206 C168 1.4236 . ? 
C205 C81 1.3778 . ? 
C204 C60 1.3785 . ? 
C204 N20 1.3992 . ? 
C203 C129 1.4137 . ? 
C203 C190 1.4231 . ? 
C200 C181 1.3216 . ? 
C200 C132 1.4263 . ? 
C199 C94 1.3870 . ? 
C199 N23 1.4059 . ? 
C198 N11 1.3396 . ? 
C198 C42 1.4365 . ? 
C197 C187 1.4536 . ? 
C197 C126 1.5261 . ? 
N40 C196 1.2564 . ? 
N40 C21 1.4809 . ? 
C196 C66 1.4402 . ? 
C195 C101 1.3413 . ? 
C195 C184 1.3552 . ? 
C194 C186 1.3587 . ? 
C194 C98 1.4444 . ? 
C193 C176 1.4826 . ? 
C192 N15 1.3464 . ? 
C191 N2 1.6843 . ? 
C191 C187 1.7393 . ? 
C189 C20 1.3991 . ? 
C185 C22 1.4084 . ? 
C184 N3 1.3539 . ? 
C183 N3 1.2522 . ? 
C183 C31 1.3143 . ? 
C182 N7 1.3042 . ? 
C182 C15 1.4159 . ? 
N39 C26 1.1835 . ? 
N39 C14 1.3635 . ? 
C179 N6 1.4268 . ? 
O5 C7 1.2060 . ? 
C177 C81 1.5210 . ? 
N36 C112 1.2889 . ? 
N36 C152 1.3735 . ? 
N35 C131 1.3597 . ? 
N35 C149 1.3824 . ? 
C176 C147 1.3015 . ? 
C176 C93 1.3463 . ? 
C175 C171 1.5058 . ? 
C173 C163 1.5392 . ? 
C172 C117 1.5668 . ? 
C171 C67 1.3589 . ? 
C171 C42 1.4765 . ? 
O4 C154 1.1741 . ? 
N31 C121 1.2819 . ? 
N31 C109 1.3938 . ? 
C170 C108 1.3806 . ? 
C170 C130 1.4921 . ? 
C169 C138 1.5052 . ? 
C168 C55 1.4413 . ? 
C168 C158 1.4902 . ? 
C167 C159 1.4604 . ? 
C166 C106 1.3797 . ? 
C166 C142 1.5232 . ? 
C165 C137 1.5162 . ? 
C164 C109 1.3954 . ? 
C163 C113 1.3335 . ? 
C163 C74 1.3523 . ? 
C162 C99 1.5647 . ? 
C161 C110 1.4239 . ? 
C161 C96 1.4646 . ? 
C161 C154 1.4651 . ? 
C160 C94 1.3515 . ? 
C160 C123 1.4549 . ? 
C160 C153 1.5656 . ? 
C159 C139 1.4147 . ? 
C157 C132 1.5784 . ? 
C156 C135 1.5592 . ? 
C155 C120 1.5207 . ? 
C152 C74 1.4219 3_376 ? 
C151 C95 1.5523 . ? 
C150 C136 1.3981 . ? 
C150 C90 1.4574 . ? 
C149 C124 1.3573 . ? 
C148 C141 1.4302 . ? 
C148 C77 1.4390 . ? 
C147 C133 1.4464 . ? 
C146 C136 1.5167 . ? 
C145 C121 1.3670 . ? 
C143 C129 1.4275 . ? 
C141 C122 1.3708 . ? 
C139 C128 1.3712 . ? 
C138 C66 1.4247 . ? 
C137 C48 1.3601 . ? 
C137 C91 1.3719 . ? 
C136 C64 1.4315 . ? 
C135 C59 1.3262 . ? 
C135 C104 1.3287 . ? 
C133 N25 1.2590 . ? 
C132 C22 1.3136 . ? 
C131 C127 1.3602 . ? 
C129 C44 1.4114 . ? 
C128 N26 1.4028 . ? 
C127 C117 1.3248 . ? 
C125 C103 1.6071 . ? 
C124 C117 1.4353 . ? 
C122 C86 1.3405 . ? 
C120 C107 1.3896 . ? 
C120 C60 1.4374 . ? 
N26 C49 1.3744 . ? 
N25 C62 1.2322 . ? 
C119 C118 1.4145 . ? 
C119 C115 1.4640 . ? 
C119 C87 1.4676 . ? 
N24 C105 1.3294 . ? 
N24 C46 1.3466 . ? 
C118 C97 1.3311 . ? 
C116 C75 1.3790 . ? 
C114 C58 1.4426 . ? 
C113 C112 1.4150 3_376 ? 
C112 C113 1.4150 3_376 ? 
C111 C98 1.5092 . ? 
C110 C76 1.4490 . ? 
C108 C79 1.3661 . ? 
C106 C105 1.4126 . ? 
C104 C26 1.5098 . ? 
C103 C52 1.3710 . ? 
N22 C82 1.2912 . ? 
N22 C97 1.4275 . ? 
C102 C57 1.3543 . ? 
C102 C98 1.3759 . ? 
C101 C31 1.4082 . ? 
C101 C88 1.5759 . ? 
C100 C18 1.4303 . ? 
C99 C33 1.3113 . ? 
C99 C37 1.3343 . ? 
C96 C63 1.4704 . ? 
C95 C73 1.4198 . ? 
C93 C62 1.4306 . ? 
C92 C39 1.3882 . ? 
C92 C28 1.4512 . ? 
C91 C38 1.4849 . ? 
C89 C83 1.4014 . ? 
N21 C79 1.3334 . ? 
N21 C80 1.3443 . ? 
C87 C82 1.3177 . ? 
N19 C85 1.3334 . ? 
N19 C65 1.4409 . ? 
N18 C83 1.2737 . ? 
N18 C32 1.4721 . ? 
N17 C86 1.3319 . ? 
N17 C77 1.3419 . ? 
N16 C76 1.2803 . ? 
N16 C63 1.2896 . ? 
C78 C44 1.3695 . ? 
C74 C152 1.4219 3_376 ? 
C73 C54 1.4278 . ? 
C72 C32 1.4866 . ? 
C71 C34 1.4610 . ? 
O2 C36 1.2708 . ? 
N14 C50 1.3876 . ? 
N14 C53 1.4015 . ? 
N13 C30 1.3685 . ? 
N13 C54 1.4157 . ? 
N12 C58 1.3082 . ? 
N11 C45 1.4198 . ? 
C70 C29 1.4628 . ? 
C70 C61 1.4920 . ? 
N10 C43 1.3545 . ? 
N10 C12 1.4227 . ? 
C69 C25 1.3414 . ? 
C69 C68 1.3824 . ? 
C68 C56 1.5771 . ? 
N9 C27 1.3195 . ? 
N9 C38 1.3508 . ? 
C67 C45 1.3540 . ? 
C64 C51 1.4147 . ? 
N8 C47 1.3391 . ? 
C59 C14 1.4497 . ? 
C55 C50 1.3859 . ? 
C52 C47 1.4266 . ? 
C48 C27 1.4412 . ? 
C43 C33 1.3897 . ? 
C41 C11 1.3517 . ? 
C41 C23 1.4586 . ? 
C41 C36 1.5867 . ? 
C40 C28 1.3736 . ? 
C39 C17 1.3769 . ? 
C37 C12 1.4285 . ? 
O1 C35 1.3890 . ? 
N7 C6 1.4391 . ? 
N5 C16 1.4330 . ? 
N5 C10 1.4362 . ? 
N4 C8 1.3807 . ? 
N4 C9 1.4969 . ? 
C29 C16 1.4786 . ? 
C24 C19 1.5377 . ? 
C23 C9 1.6302 . ? 
C13 N2 1.6748 . ? 
C11 C8 1.4439 . ? 
C7 C4 1.5436 . ? 
C5 C3 1.3285 . ? 
C5 N1 1.3296 . ? 
C4 C2 1.3532 . ? 
C4 C3 1.4017 . ? 
C2 C1 1.3491 . ? 
N1 C1 1.3965 . ? 
 
loop_ 
 _geom_angle_atom_site_label_1 
 _geom_angle_atom_site_label_2 
 _geom_angle_atom_site_label_3 
 _geom_angle 
 _geom_angle_site_symmetry_1 
 _geom_angle_site_symmetry_3 
 _geom_angle_publ_flag 
O141 Dy1 O121 71.6(5) . . ? 
O141 Dy1 O99 129.8(4) . . ? 
O121 Dy1 O99 69.5(5) . . ? 
O141 Dy1 O10 146.8(4) . . ? 
O121 Dy1 O10 102.8(4) . . ? 
O99 Dy1 O10 73.3(4) . . ? 
O141 Dy1 O108 85.5(4) . . ? 
O121 Dy1 O108 142.8(4) . . ? 
O99 Dy1 O108 143.3(5) . . ? 
O10 Dy1 O108 80.4(4) . . ? 
O141 Dy1 O127 77.3(5) . . ? 
O121 Dy1 O127 93.1(5) . . ? 
O99 Dy1 O127 74.5(5) . . ? 
O10 Dy1 O127 135.8(5) . . ? 
O108 Dy1 O127 110.4(5) . . ? 
O141 Dy1 O159 70.3(4) . . ? 
O121 Dy1 O159 70.8(4) . . ? 
O99 Dy1 O159 122.4(5) . . ? 
O10 Dy1 O159 76.9(4) . . ? 
O108 Dy1 O159 74.0(4) . . ? 
O127 Dy1 O159 147.0(4) . . ? 
O141 Dy1 O133 129.7(5) . . ? 
O121 Dy1 O133 149.6(4) . . ? 
O99 Dy1 O133 80.4(5) . . ? 
O10 Dy1 O133 71.1(4) . . ? 
O108 Dy1 O133 67.0(4) . . ? 
O127 Dy1 O133 74.4(5) . . ? 
O159 Dy1 O133 132.6(4) . . ? 
O141 Dy1 Dy4 79.2(3) . . ? 
O121 Dy1 Dy4 37.9(3) . . ? 
O99 Dy1 Dy4 88.7(4) . . ? 
O10 Dy1 Dy4 77.8(3) . . ? 
O108 Dy1 Dy4 110.4(3) . . ? 
O127 Dy1 Dy4 130.6(4) . . ? 
O159 Dy1 Dy4 36.8(3) . . ? 
O133 Dy1 Dy4 148.8(3) . . ? 
O141 Dy1 Dy2 38.9(3) . . ? 
O121 Dy1 Dy2 36.0(3) . . ? 
O99 Dy1 Dy2 92.9(3) . . ? 
O10 Dy1 Dy2 137.4(3) . . ? 
O108 Dy1 Dy2 123.7(3) . . ? 
O127 Dy1 Dy2 73.1(4) . . ? 
O159 Dy1 Dy2 77.6(3) . . ? 
O133 Dy1 Dy2 147.5(3) . . ? 
Dy4 Dy1 Dy2 61.49(3) . . ? 
O141 Dy1 Dy3 34.9(3) . . ? 
O121 Dy1 Dy3 74.5(3) . . ? 
O99 Dy1 Dy3 143.7(4) . . ? 
O10 Dy1 Dy3 111.9(3) . . ? 
O108 Dy1 Dy3 70.1(3) . . ? 
O127 Dy1 Dy3 112.0(3) . . ? 
O159 Dy1 Dy3 36.8(3) . . ? 
O133 Dy1 Dy3 135.8(3) . . ? 
Dy4 Dy1 Dy3 59.32(3) . . ? 
Dy2 Dy1 Dy3 58.25(3) . . ? 
O141 Dy1 Dy21 100.5(3) . . ? 
O121 Dy1 Dy21 171.8(3) . . ? 
O99 Dy1 Dy21 115.9(4) . . ? 
O10 Dy1 Dy21 85.0(3) . . ? 
O108 Dy1 Dy21 35.2(3) . . ? 
O127 Dy1 Dy21 82.8(4) . . ? 
O159 Dy1 Dy21 109.1(3) . . ? 
O133 Dy1 Dy21 35.6(3) . . ? 
Dy4 Dy1 Dy21 144.41(4) . . ? 
Dy2 Dy1 Dy21 135.82(4) . . ? 
Dy3 Dy1 Dy21 100.37(3) . . ? 
O101 Dy10 O158 72.7(4) . . ? 
O101 Dy10 O56 108.3(5) . . ? 
O158 Dy10 O56 147.8(5) . . ? 
O101 Dy10 O107 147.7(5) . . ? 
O158 Dy10 O107 124.9(5) . . ? 
O56 Dy10 O107 71.9(5) . . ? 
O101 Dy10 O152 82.1(5) . . ? 
O158 Dy10 O152 70.1(4) . . ? 
O56 Dy10 O152 78.2(5) . . ? 
O107 Dy10 O152 127.8(4) . . ? 
O101 Dy10 O156 67.0(4) . . ? 
O158 Dy10 O156 131.1(4) . . ? 
O56 Dy10 O156 73.3(5) . . ? 
O107 Dy10 O156 83.0(4) . . ? 
O152 Dy10 O156 127.6(4) . . ? 
O101 Dy10 O154 84.9(5) . . ? 
O158 Dy10 O154 77.6(4) . . ? 
O56 Dy10 O154 134.3(5) . . ? 
O107 Dy10 O154 74.6(5) . . ? 
O152 Dy10 O154 147.5(4) . . ? 
O156 Dy10 O154 72.5(4) . . ? 
O101 Dy10 O124 141.7(5) . . ? 
O158 Dy10 O124 72.1(4) . . ? 
O56 Dy10 O124 93.9(5) . . ? 
O107 Dy10 O124 68.4(5) . . ? 
O152 Dy10 O124 72.1(4) . . ? 
O156 Dy10 O124 151.2(4) . . ? 
O154 Dy10 O124 101.8(4) . . ? 
O101 Dy10 Dy11 120.1(4) . . ? 
O158 Dy10 Dy11 78.3(3) . . ? 
O56 Dy10 Dy11 73.7(3) . . ? 
O107 Dy10 Dy11 91.5(3) . . ? 
O152 Dy10 Dy11 38.5(3) . . ? 
O156 Dy10 Dy11 146.7(3) . . ? 
O154 Dy10 Dy11 137.5(3) . . ? 
O124 Dy10 Dy11 36.9(3) . . ? 
O101 Dy10 Dy12 109.2(3) . . ? 
O158 Dy10 Dy12 36.6(3) . . ? 
O56 Dy10 Dy12 131.1(3) . . ? 
O107 Dy10 Dy12 91.5(4) . . ? 
O152 Dy10 Dy12 77.1(3) . . ? 
O156 Dy10 Dy12 151.7(3) . . ? 
O154 Dy10 Dy12 79.3(3) . . ? 
O124 Dy10 Dy12 38.3(3) . . ? 
Dy11 Dy10 Dy12 60.76(3) . . ? 
O101 Dy10 Dy9 63.9(3) . . ? 
O158 Dy10 Dy9 36.1(3) . . ? 
O56 Dy10 Dy9 113.9(4) . . ? 
O107 Dy10 Dy9 147.0(3) . . ? 
O152 Dy10 Dy9 36.7(3) . . ? 
O156 Dy10 Dy9 130.0(3) . . ? 
O154 Dy10 Dy9 111.1(3) . . ? 
O124 Dy10 Dy9 78.7(3) . . ? 
Dy11 Dy10 Dy9 61.78(3) . . ? 
Dy12 Dy10 Dy9 59.45(3) . . ? 
O101 Dy10 Dy13 78.2(4) . . ? 
O158 Dy10 Dy13 108.8(3) . . ? 
O56 Dy10 Dy13 102.7(3) . . ? 
O107 Dy10 Dy13 70.5(3) . . ? 
O152 Dy10 Dy13 159.5(3) . . ? 
O156 Dy10 Dy13 37.4(3) . . ? 
O154 Dy10 Dy13 35.8(3) . . ? 
O124 Dy10 Dy13 127.8(3) . . ? 
Dy11 Dy10 Dy13 161.72(4) . . ? 
Dy12 Dy10 Dy13 114.77(3) . . ? 
Dy9 Dy10 Dy13 133.39(3) . . ? 
O110 Dy3 O117 146.9(4) . . ? 
O110 Dy3 O141 82.9(5) . . ? 
O117 Dy3 O141 74.5(5) . . ? 
O110 Dy3 O62 97.1(5) . . ? 
O117 Dy3 O62 99.3(5) . . ? 
O141 Dy3 O62 73.9(5) . . ? 
O110 Dy3 O145 67.5(5) . . ? 
O117 Dy3 O145 145.1(4) . . ? 
O141 Dy3 O145 131.4(4) . . ? 
O62 Dy3 O145 72.7(5) . . ? 
O110 Dy3 O142 86.3(5) . . ? 
O117 Dy3 O142 98.4(4) . . ? 
O141 Dy3 O142 144.8(4) . . ? 
O62 Dy3 O142 140.9(5) . . ? 
O145 Dy3 O142 72.9(4) . . ? 
O110 Dy3 O159 78.1(4) . . ? 
O117 Dy3 O159 71.6(4) . . ? 
O141 Dy3 O159 69.8(4) . . ? 
O62 Dy3 O159 143.6(4) . . ? 
O145 Dy3 O159 133.9(4) . . ? 
O142 Dy3 O159 75.3(4) . . ? 
O110 Dy3 O82 143.0(5) . . ? 
O117 Dy3 O82 69.9(5) . . ? 
O141 Dy3 O82 123.8(4) . . ? 
O62 Dy3 O82 70.8(5) . . ? 
O145 Dy3 O82 75.5(5) . . ? 
O142 Dy3 O82 83.2(4) . . ? 
O159 Dy3 O82 132.1(5) . . ? 
O110 Dy3 Dy2 123.7(3) . . ? 
O117 Dy3 Dy2 37.9(3) . . ? 
O141 Dy3 Dy2 40.9(3) . . ? 
O62 Dy3 Dy2 73.5(4) . . ? 
O145 Dy3 Dy2 145.5(3) . . ? 
O142 Dy3 Dy2 135.2(3) . . ? 
O159 Dy3 Dy2 79.5(3) . . ? 
O82 Dy3 Dy2 87.2(3) . . ? 
O110 Dy3 Dy4 114.5(3) . . ? 
O117 Dy3 Dy4 37.9(3) . . ? 
O141 Dy3 Dy4 78.6(3) . . ? 
O62 Dy3 Dy4 134.6(4) . . ? 
O145 Dy3 Dy4 148.3(3) . . ? 
O142 Dy3 Dy4 75.7(3) . . ? 
O159 Dy3 Dy4 36.5(3) . . ? 
O82 Dy3 Dy4 97.1(4) . . ? 
Dy2 Dy3 Dy4 62.18(3) . . ? 
O110 Dy3 Dy1 70.9(3) . . ? 
O117 Dy3 Dy1 76.8(3) . . ? 
O141 Dy3 Dy1 34.5(3) . . ? 
O62 Dy3 Dy1 107.4(3) . . ? 
O145 Dy3 Dy1 138.0(3) . . ? 
O142 Dy3 Dy1 110.4(3) . . ? 
O159 Dy3 Dy1 36.7(3) . . ? 
O82 Dy3 Dy1 145.7(3) . . ? 
Dy2 Dy3 Dy1 60.59(3) . . ? 
Dy4 Dy3 Dy1 58.88(3) . . ? 
O110 Dy3 Dy7 79.6(3) . . ? 
O117 Dy3 Dy7 122.9(3) . . ? 
O141 Dy3 Dy7 162.2(3) . . ? 
O62 Dy3 Dy7 104.7(4) . . ? 
O145 Dy3 Dy7 36.3(3) . . ? 
O142 Dy3 Dy7 37.4(3) . . ? 
O159 Dy3 Dy7 109.7(3) . . ? 
O82 Dy3 Dy7 70.6(3) . . ? 
Dy2 Dy3 Dy7 156.61(4) . . ? 
Dy4 Dy3 Dy7 112.05(4) . . ? 
Dy1 Dy3 Dy7 138.44(4) . . ? 
O5 Dy5 O111 84.2(3) . . ? 
O5 Dy5 O135 139.2(3) . . ? 
O111 Dy5 O135 72.0(5) . . ? 
O5 Dy5 O91 84.6(4) . . ? 
O111 Dy5 O91 144.7(5) . . ? 
O135 Dy5 O91 133.0(5) . . ? 
O5 Dy5 O144 72.9(3) . . ? 
O111 Dy5 O144 82.0(4) . . ? 
O135 Dy5 O144 71.3(4) . . ? 
O91 Dy5 O144 125.9(4) . . ? 
O5 Dy5 O120 112.8(3) . . ? 
O111 Dy5 O120 138.3(4) . . ? 
O135 Dy5 O120 71.0(4) . . ? 
O91 Dy5 O120 76.6(5) . . ? 
O144 Dy5 O120 68.6(4) . . ? 
O5 Dy5 O150 74.0(3) . . ? 
O111 Dy5 O150 67.0(4) . . ? 
O135 Dy5 O150 122.4(4) . . ? 
O91 Dy5 O150 77.7(5) . . ? 
O144 Dy5 O150 136.3(4) . . ? 
O120 Dy5 O150 152.6(4) . . ? 
O5 Dy5 O126 140.9(3) . . ? 
O111 Dy5 O126 87.9(4) . . ? 
O135 Dy5 O126 72.2(4) . . ? 
O91 Dy5 O126 80.0(5) . . ? 
O144 Dy5 O126 143.6(4) . . ? 
O120 Dy5 O126 98.4(4) . . ? 
O150 Dy5 O126 67.7(4) . . ? 
O5 Dy5 Dy7 102.42(4) . . ? 
O111 Dy5 Dy7 61.1(3) . . ? 
O135 Dy5 Dy7 37.0(3) . . ? 
O91 Dy5 Dy7 154.2(4) . . ? 
O144 Dy5 Dy7 38.3(3) . . ? 
O120 Dy5 Dy7 77.8(3) . . ? 
O150 Dy5 Dy7 128.0(3) . . ? 
O126 Dy5 Dy7 107.0(3) . . ? 
O5 Dy5 Dy6 144.17(4) . . ? 
O111 Dy5 Dy6 108.7(3) . . ? 
O135 Dy5 Dy6 36.7(3) . . ? 
O91 Dy5 Dy6 99.8(4) . . ? 
O144 Dy5 Dy6 76.0(3) . . ? 
O120 Dy5 Dy6 37.1(3) . . ? 
O150 Dy5 Dy6 141.8(3) . . ? 
O126 Dy5 Dy6 74.3(3) . . ? 
Dy7 Dy5 Dy6 60.12(3) . . ? 
O5 Dy5 Dy25 66.14(3) . . ? 
O111 Dy5 Dy25 35.0(3) . . ? 
O135 Dy5 Dy25 104.6(3) . . ? 
O91 Dy5 Dy25 110.6(4) . . ? 
O144 Dy5 Dy25 104.1(3) . . ? 
O120 Dy5 Dy25 172.2(3) . . ? 
O150 Dy5 Dy25 35.1(3) . . ? 
O126 Dy5 Dy25 86.0(3) . . ? 
Dy7 Dy5 Dy25 94.83(3) . . ? 
Dy6 Dy5 Dy25 140.20(4) . . ? 
O5 Dy5 Dy15 106.40(4) . . ? 
O111 Dy5 Dy15 79.9(3) . . ? 
O135 Dy5 Dy15 101.5(3) . . ? 
O91 Dy5 Dy15 71.4(3) . . ? 
O144 Dy5 Dy15 161.8(3) . . ? 
O120 Dy5 Dy15 125.9(3) . . ? 
O150 Dy5 Dy15 33.8(3) . . ? 
O126 Dy5 Dy15 34.5(3) . . ? 
Dy7 Dy5 Dy15 128.07(4) . . ? 
Dy6 Dy5 Dy15 108.71(3) . . ? 
Dy25 Dy5 Dy15 60.67(3) . . ? 
O64 Dy17 O118 76.8(5) . . ? 
O64 Dy17 O138 96.4(5) . . ? 
O118 Dy17 O138 73.8(5) . . ? 
O64 Dy17 O147 148.6(5) . . ? 
O118 Dy17 O147 72.0(4) . . ? 
O138 Dy17 O147 72.0(5) . . ? 
O64 Dy17 O155 100.4(5) . . ? 
O118 Dy17 O155 84.2(5) . . ? 
O138 Dy17 O155 148.4(4) . . ? 
O147 Dy17 O155 79.9(4) . . ? 
O64 Dy17 O114 135.1(5) . . ? 
O118 Dy17 O114 148.0(4) . . ? 
O138 Dy17 O114 98.8(4) . . ? 
O147 Dy17 O114 76.1(4) . . ? 
O155 Dy17 O114 87.9(4) . . ? 
O64 Dy17 O128 71.4(5) . . ? 
O118 Dy17 O128 125.7(5) . . ? 
O138 Dy17 O128 67.6(5) . . ? 
O147 Dy17 O128 125.8(5) . . ? 
O155 Dy17 O128 143.5(5) . . ? 
O114 Dy17 O128 76.0(4) . . ? 
O64 Dy17 O148 70.7(5) . . ? 
O118 Dy17 O148 131.7(4) . . ? 
O138 Dy17 O148 143.4(4) . . ? 
O147 Dy17 O148 134.9(4) . . ? 
O155 Dy17 O148 68.0(4) . . ? 
O114 Dy17 O148 72.0(4) . . ? 
O128 Dy17 O148 75.8(5) . . ? 
O64 Dy17 Dy19 133.2(3) . . ? 
O118 Dy17 Dy19 79.5(3) . . ? 
O138 Dy17 Dy19 37.8(3) . . ? 
O147 Dy17 Dy19 36.9(3) . . ? 
O155 Dy17 Dy19 116.7(3) . . ? 
O114 Dy17 Dy19 76.6(3) . . ? 
O128 Dy17 Dy19 91.5(4) . . ? 
O148 Dy17 Dy19 148.1(3) . . ? 
O64 Dy17 Dy20 73.3(3) . . ? 
O118 Dy17 Dy20 38.3(3) . . ? 
O138 Dy17 Dy20 39.2(3) . . ? 
O147 Dy17 Dy20 80.1(3) . . ? 
O155 Dy17 Dy20 122.5(3) . . ? 
O114 Dy17 Dy20 137.0(3) . . ? 
O128 Dy17 Dy20 90.0(3) . . ? 
O148 Dy17 Dy20 143.9(3) . . ? 
Dy19 Dy17 Dy20 63.17(3) . . ? 
O64 Dy17 Dy18 112.0(4) . . ? 
O118 Dy17 Dy18 35.7(3) . . ? 
O138 Dy17 Dy18 76.2(3) . . ? 
O147 Dy17 Dy18 37.7(3) . . ? 
O155 Dy17 Dy18 72.7(3) . . ? 
O114 Dy17 Dy18 112.5(3) . . ? 
O128 Dy17 Dy18 143.8(4) . . ? 
O148 Dy17 Dy18 140.3(3) . . ? 
Dy19 Dy17 Dy18 59.10(3) . . ? 
Dy20 Dy17 Dy18 59.12(3) . . ? 
O64 Dy17 Dy12 101.2(4) . . ? 
O118 Dy17 Dy12 163.0(3) . . ? 
O138 Dy17 Dy12 123.1(3) . . ? 
O147 Dy17 Dy12 109.6(3) . . ? 
O155 Dy17 Dy12 79.5(3) . . ? 
O114 Dy17 Dy12 36.7(3) . . ? 
O128 Dy17 Dy12 67.9(3) . . ? 
O148 Dy17 Dy12 35.8(3) . . ? 
Dy19 Dy17 Dy12 112.26(4) . . ? 
Dy20 Dy17 Dy12 157.72(4) . . ? 
Dy18 Dy17 Dy12 139.62(4) . . ? 
O90 Dy18 O130 93.6(5) . . ? 
O90 Dy18 O132 99.8(5) . . ? 
O130 Dy18 O132 144.2(5) . . ? 
O90 Dy18 O118 76.2(5) . . ? 
O130 Dy18 O118 72.2(5) . . ? 
O132 Dy18 O118 78.9(4) . . ? 
O90 Dy18 O157 74.1(5) . . ? 
O130 Dy18 O157 148.5(5) . . ? 
O132 Dy18 O157 67.3(4) . . ? 
O118 Dy18 O157 129.6(5) . . ? 
O90 Dy18 O11 137.4(5) . . ? 
O130 Dy18 O11 101.8(4) . . ? 
O132 Dy18 O11 90.5(4) . . ? 
O118 Dy18 O11 146.3(4) . . ? 
O157 Dy18 O11 72.1(4) . . ? 
O90 Dy18 O147 146.1(5) . . ? 
O130 Dy18 O147 71.8(4) . . ? 
O132 Dy18 O147 78.9(4) . . ? 
O118 Dy18 O147 70.2(4) . . ? 
O157 Dy18 O147 132.8(4) . . ? 
O11 Dy18 O147 76.4(4) . . ? 
O90 Dy18 O45 74.4(5) . . ? 
O130 Dy18 O45 67.9(5) . . ? 
O132 Dy18 O45 147.8(5) . . ? 
O118 Dy18 O45 128.0(5) . . ? 
O157 Dy18 O45 80.8(4) . . ? 
O11 Dy18 O45 75.2(5) . . ? 
O147 Dy18 O45 123.6(5) . . ? 
O90 Dy18 Dy19 131.0(4) . . ? 
O130 Dy18 Dy19 38.2(3) . . ? 
O132 Dy18 Dy19 116.2(3) . . ? 
O118 Dy18 Dy19 79.2(3) . . ? 
O157 Dy18 Dy19 149.1(3) . . ? 
O11 Dy18 Dy19 77.1(3) . . ? 
O147 Dy18 Dy19 37.3(3) . . ? 
O45 Dy18 Dy19 89.0(4) . . ? 
O90 Dy18 Dy20 70.8(4) . . ? 
O130 Dy18 Dy20 37.5(3) . . ? 
O132 Dy18 Dy20 118.0(3) . . ? 
O118 Dy18 Dy20 39.0(3) . . ? 
O157 Dy18 Dy20 144.9(3) . . ? 
O11 Dy18 Dy20 138.3(3) . . ? 
O147 Dy18 Dy20 79.9(3) . . ? 
O45 Dy18 Dy20 90.6(3) . . ? 
Dy19 Dy18 Dy20 63.41(3) . . ? 
O90 Dy18 Dy17 111.3(4) . . ? 
O130 Dy18 Dy17 75.2(3) . . ? 
O132 Dy18 Dy17 69.1(3) . . ? 
O118 Dy18 Dy17 35.4(3) . . ? 
O157 Dy18 Dy17 136.3(3) . . ? 
O11 Dy18 Dy17 111.0(3) . . ? 
O147 Dy18 Dy17 36.2(3) . . ? 
O45 Dy18 Dy17 142.9(3) . . ? 
Dy19 Dy18 Dy17 58.94(3) . . ? 
Dy20 Dy18 Dy17 59.91(3) . . ? 
O90 Dy18 Dy6 104.8(4) . . ? 
O130 Dy18 Dy6 126.9(3) . . ? 
O132 Dy18 Dy6 81.4(3) . . ? 
O118 Dy18 Dy6 160.2(3) . . ? 
O157 Dy18 Dy6 36.9(3) . . ? 
O11 Dy18 Dy6 35.8(3) . . ? 
O147 Dy18 Dy6 108.4(3) . . ? 
O45 Dy18 Dy6 70.0(3) . . ? 
Dy19 Dy18 Dy6 112.23(4) . . ? 
Dy20 Dy18 Dy6 160.41(4) . . ? 
Dy17 Dy18 Dy6 136.25(4) . . ? 
O42 Dy2 O60 143.0(6) . . ? 
O42 Dy2 O24 94.2(6) . . ? 
O60 Dy2 O24 88.9(6) . . ? 
O42 Dy2 O121 85.6(5) . . ? 
O60 Dy2 O121 113.6(5) . . ? 
O24 Dy2 O121 141.9(5) . . ? 
O42 Dy2 O117 142.7(5) . . ? 
O60 Dy2 O117 74.0(5) . . ? 
O24 Dy2 O117 90.2(5) . . ? 
O121 Dy2 O117 68.9(4) . . ? 
O42 Dy2 O119 80.8(5) . . ? 
O60 Dy2 O119 76.4(5) . . ? 
O24 Dy2 O119 145.9(5) . . ? 
O121 Dy2 O119 71.7(5) . . ? 
O117 Dy2 O119 114.2(5) . . ? 
O42 Dy2 O141 74.1(5) . . ? 
O60 Dy2 O141 141.4(5) . . ? 
O24 Dy2 O141 74.4(5) . . ? 
O121 Dy2 O141 68.9(4) . . ? 
O117 Dy2 O141 71.5(4) . . ? 
O119 Dy2 O141 134.3(4) . . ? 
O42 Dy2 O30 73.3(6) . . ? 
O60 Dy2 O30 73.0(6) . . ? 
O24 Dy2 O30 70.8(5) . . ? 
O121 Dy2 O30 143.4(5) . . ? 
O117 Dy2 O30 141.9(5) . . ? 
O119 Dy2 O30 75.5(5) . . ? 
O141 Dy2 O30 129.6(5) . . ? 
O42 Dy2 Dy3 112.0(4) . . ? 
O60 Dy2 Dy3 103.3(4) . . ? 
O24 Dy2 Dy3 67.9(4) . . ? 
O121 Dy2 Dy3 76.9(3) . . ? 
O117 Dy2 Dy3 37.5(3) . . ? 
O119 Dy2 Dy3 145.1(3) . . ? 
O141 Dy2 Dy3 38.2(3) . . ? 
O30 Dy2 Dy3 138.6(4) . . ? 
O42 Dy2 Dy1 66.7(4) . . ? 
O60 Dy2 Dy1 145.3(4) . . ? 
O24 Dy2 Dy1 110.0(4) . . ? 
O121 Dy2 Dy1 36.1(3) . . ? 
O117 Dy2 Dy1 77.0(3) . . ? 
O119 Dy2 Dy1 99.0(3) . . ? 
O141 Dy2 Dy1 36.0(3) . . ? 
O30 Dy2 Dy1 140.0(4) . . ? 
Dy3 Dy2 Dy1 61.16(3) . . ? 
O42 Dy2 Dy4 120.1(4) . . ? 
O60 Dy2 Dy4 87.2(4) . . ? 
O24 Dy2 Dy4 124.2(4) . . ? 
O121 Dy2 Dy4 35.2(3) . . ? 
O117 Dy2 Dy4 35.8(3) . . ? 
O119 Dy2 Dy4 86.1(3) . . ? 
O141 Dy2 Dy4 74.9(3) . . ? 
O30 Dy2 Dy4 155.5(4) . . ? 
Dy3 Dy2 Dy4 59.16(3) . . ? 
Dy1 Dy2 Dy4 58.12(3) . . ? 
O140 Dy4 O159 76.1(4) . . ? 
O140 Dy4 O54 78.9(5) . . ? 
O159 Dy4 O54 142.6(5) . . ? 
O140 Dy4 O80 141.4(5) . . ? 
O159 Dy4 O80 140.7(5) . . ? 
O54 Dy4 O80 72.5(5) . . ? 
O140 Dy4 O121 140.6(5) . . ? 
O159 Dy4 O121 72.2(4) . . ? 
O54 Dy4 O121 114.3(5) . . ? 
O80 Dy4 O121 76.2(5) . . ? 
O140 Dy4 O137 115.5(5) . . ? 
O159 Dy4 O137 76.8(4) . . ? 
O54 Dy4 O137 139.8(5) . . ? 
O80 Dy4 O137 74.9(5) . . ? 
O121 Dy4 O137 79.3(4) . . ? 
O140 Dy4 O117 80.1(5) . . ? 
O159 Dy4 O117 72.5(4) . . ? 
O54 Dy4 O117 76.2(5) . . ? 
O80 Dy4 O117 116.4(5) . . ? 
O121 Dy4 O117 68.6(4) . . ? 
O137 Dy4 O117 140.8(4) . . ? 
O140 Dy4 O125 68.7(5) . . ? 
O159 Dy4 O125 109.5(4) . . ? 
O54 Dy4 O125 86.3(5) . . ? 
O80 Dy4 O125 83.8(5) . . ? 
O121 Dy4 O125 144.6(4) . . ? 
O137 Dy4 O125 67.3(4) . . ? 
O117 Dy4 O125 146.7(4) . . ? 
O140 Dy4 Dy1 114.4(3) . . ? 
O159 Dy4 Dy1 38.3(3) . . ? 
O54 Dy4 Dy1 149.1(4) . . ? 
O80 Dy4 Dy1 103.3(4) . . ? 
O121 Dy4 Dy1 37.9(3) . . ? 
O137 Dy4 Dy1 62.0(3) . . ? 
O117 Dy4 Dy1 78.8(3) . . ? 
O125 Dy4 Dy1 124.3(3) . . ? 
O140 Dy4 Dy3 64.2(3) . . ? 
O159 Dy4 Dy3 38.2(3) . . ? 
O54 Dy4 Dy3 105.4(4) . . ? 
O80 Dy4 Dy3 148.5(4) . . ? 
O121 Dy4 Dy3 76.4(3) . . ? 
O137 Dy4 Dy3 114.7(3) . . ? 
O117 Dy4 Dy3 37.2(3) . . ? 
O125 Dy4 Dy3 127.7(3) . . ? 
Dy1 Dy4 Dy3 61.80(3) . . ? 
O140 Dy4 Dy2 115.2(3) . . ? 
O159 Dy4 Dy2 77.5(3) . . ? 
O54 Dy4 Dy2 88.7(4) . . ? 
O80 Dy4 Dy2 89.8(4) . . ? 
O121 Dy4 Dy2 35.1(3) . . ? 
O137 Dy4 Dy2 114.2(3) . . ? 
O117 Dy4 Dy2 35.5(3) . . ? 
O125 Dy4 Dy2 172.9(3) . . ? 
Dy1 Dy4 Dy2 60.39(3) . . ? 
Dy3 Dy4 Dy2 58.66(3) . . ? 
O150 Dy15 O115 147.4(4) . . ? 
O150 Dy15 O153 130.4(5) . . ? 
O115 Dy15 O153 70.4(5) . . ? 
O150 Dy15 O143 72.9(5) . . ? 
O115 Dy15 O143 92.8(5) . . ? 
O153 Dy15 O143 76.2(5) . . ? 
O150 Dy15 O126 70.5(4) . . ? 
O115 Dy15 O126 102.5(5) . . ? 
O153 Dy15 O126 151.1(4) . . ? 
O143 Dy15 O126 132.8(5) . . ? 
O150 Dy15 O149 134.1(4) . . ? 
O115 Dy15 O149 71.5(4) . . ? 
O153 Dy15 O149 72.1(4) . . ? 
O143 Dy15 O149 147.8(4) . . ? 
O126 Dy15 O149 79.0(4) . . ? 
O150 Dy15 O74 78.6(4) . . ? 
O115 Dy15 O74 69.0(4) . . ? 
O153 Dy15 O74 126.0(4) . . ? 
O143 Dy15 O74 71.8(5) . . ? 
O126 Dy15 O74 72.6(5) . . ? 
O149 Dy15 O74 124.0(5) . . ? 
O150 Dy15 O81 66.6(4) . . ? 
O115 Dy15 O81 145.8(4) . . ? 
O153 Dy15 O81 81.3(5) . . ? 
O143 Dy15 O81 98.8(5) . . ? 
O126 Dy15 O81 93.0(5) . . ? 
O149 Dy15 O81 82.1(4) . . ? 
O74 Dy15 O81 145.1(5) . . ? 
O150 Dy15 Dy14 149.2(3) . . ? 
O115 Dy15 Dy14 38.5(3) . . ? 
O153 Dy15 Dy14 79.2(3) . . ? 
O143 Dy15 Dy14 130.8(3) . . ? 
O126 Dy15 Dy14 78.8(3) . . ? 
O149 Dy15 Dy14 36.7(3) . . ? 
O74 Dy15 Dy14 90.1(4) . . ? 
O81 Dy15 Dy14 118.8(3) . . ? 
O150 Dy15 Dy16 145.1(3) . . ? 
O115 Dy15 Dy16 36.6(3) . . ? 
O153 Dy15 Dy16 37.0(3) . . ? 
O143 Dy15 Dy16 72.3(3) . . ? 
O126 Dy15 Dy16 138.3(3) . . ? 
O149 Dy15 Dy16 79.0(3) . . ? 
O74 Dy15 Dy16 91.4(3) . . ? 
O81 Dy15 Dy16 118.3(3) . . ? 
Dy14 Dy15 Dy16 62.55(3) . . ? 
O150 Dy15 Dy13 137.5(3) . . ? 
O115 Dy15 Dy13 74.9(3) . . ? 
O153 Dy15 Dy13 36.7(3) . . ? 
O143 Dy15 Dy13 112.4(3) . . ? 
O126 Dy15 Dy13 114.7(3) . . ? 
O149 Dy15 Dy13 37.2(3) . . ? 
O74 Dy15 Dy13 143.9(3) . . ? 
O81 Dy15 Dy13 70.9(3) . . ? 
Dy14 Dy15 Dy13 59.22(3) . . ? 
Dy16 Dy15 Dy13 58.91(3) . . ? 
O150 Dy15 Dy5 35.4(3) . . ? 
O115 Dy15 Dy5 126.6(3) . . ? 
O153 Dy15 Dy5 163.0(3) . . ? 
O143 Dy15 Dy5 100.7(3) . . ? 
O126 Dy15 Dy5 35.8(3) . . ? 
O149 Dy15 Dy5 111.3(3) . . ? 
O74 Dy15 Dy5 66.9(3) . . ? 
O81 Dy15 Dy5 82.7(3) . . ? 
Dy14 Dy15 Dy5 113.88(4) . . ? 
Dy16 Dy15 Dy5 158.30(4) . . ? 
Dy13 Dy15 Dy5 140.01(4) . . ? 
O33 Dy12 O158 147.6(5) . . ? 
O33 Dy12 O148 79.5(5) . . ? 
O158 Dy12 O148 128.7(4) . . ? 
O33 Dy12 O85 112.6(5) . . ? 
O158 Dy12 O85 73.1(4) . . ? 
O148 Dy12 O85 67.1(4) . . ? 
O33 Dy12 O151 87.0(5) . . ? 
O158 Dy12 O151 71.5(4) . . ? 
O148 Dy12 O151 155.1(4) . . ? 
O85 Dy12 O151 137.7(5) . . ? 
O33 Dy12 O114 135.3(5) . . ? 
O158 Dy12 O114 74.9(4) . . ? 
O148 Dy12 O114 72.7(4) . . ? 
O85 Dy12 O114 88.0(4) . . ? 
O151 Dy12 O114 104.2(4) . . ? 
O33 Dy12 O124 78.1(5) . . ? 
O158 Dy12 O124 72.2(4) . . ? 
O148 Dy12 O124 125.4(4) . . ? 
O85 Dy12 O124 77.0(4) . . ? 
O151 Dy12 O124 70.8(4) . . ? 
O114 Dy12 O124 146.6(4) . . ? 
O33 Dy12 O52 71.8(5) . . ? 
O158 Dy12 O52 120.0(5) . . ? 
O148 Dy12 O52 85.6(5) . . ? 
O85 Dy12 O52 150.1(5) . . ? 
O151 Dy12 O52 70.4(5) . . ? 
O114 Dy12 O52 71.8(5) . . ? 
O124 Dy12 O52 131.4(4) . . ? 
O33 Dy12 Dy9 125.2(4) . . ? 
O158 Dy12 Dy9 36.9(3) . . ? 
O148 Dy12 Dy9 150.5(3) . . ? 
O85 Dy12 Dy9 109.9(3) . . ? 
O151 Dy12 Dy9 38.3(3) . . ? 
O114 Dy12 Dy9 78.0(3) . . ? 
O124 Dy12 Dy9 79.4(3) . . ? 
O52 Dy12 Dy9 87.7(4) . . ? 
O33 Dy12 Dy10 116.0(4) . . ? 
O158 Dy12 Dy10 36.9(3) . . ? 
O148 Dy12 Dy10 127.5(3) . . ? 
O85 Dy12 Dy10 60.6(3) . . ? 
O151 Dy12 Dy10 77.2(3) . . ? 
O114 Dy12 Dy10 108.7(3) . . ? 
O124 Dy12 Dy10 38.0(3) . . ? 
O52 Dy12 Dy10 146.3(4) . . ? 
Dy9 Dy12 Dy10 60.54(3) . . ? 
O33 Dy12 Dy11 71.2(4) . . ? 
O158 Dy12 Dy11 77.2(3) . . ? 
O148 Dy12 Dy11 147.8(3) . . ? 
O85 Dy12 Dy11 112.1(3) . . ? 
O151 Dy12 Dy11 37.2(3) . . ? 
O114 Dy12 Dy11 138.8(3) . . ? 
O124 Dy12 Dy11 35.8(3) . . ? 
O52 Dy12 Dy11 97.4(3) . . ? 
Dy9 Dy12 Dy11 61.61(3) . . ? 
Dy10 Dy12 Dy11 59.15(3) . . ? 
O33 Dy12 Dy17 106.3(4) . . ? 
O158 Dy12 Dy17 106.0(3) . . ? 
O148 Dy12 Dy17 36.6(3) . . ? 
O85 Dy12 Dy17 79.1(3) . . ? 
O151 Dy12 Dy17 132.7(3) . . ? 
O114 Dy12 Dy17 36.5(3) . . ? 
O124 Dy12 Dy17 155.5(3) . . ? 
O52 Dy12 Dy17 71.5(3) . . ? 
Dy9 Dy12 Dy17 114.34(4) . . ? 
Dy10 Dy12 Dy17 129.59(4) . . ? 
Dy11 Dy12 Dy17 168.63(4) . . ? 
O134 Dy8 O35 82.6(5) . . ? 
O134 Dy8 O27 90.0(5) . . ? 
O35 Dy8 O27 136.4(5) . . ? 
O134 Dy8 O144 71.5(5) . . ? 
O35 Dy8 O144 141.4(5) . . ? 
O27 Dy8 O144 73.0(5) . . ? 
O134 Dy8 O39 140.9(5) . . ? 
O35 Dy8 O39 71.5(5) . . ? 
O27 Dy8 O39 128.9(5) . . ? 
O144 Dy8 O39 112.4(5) . . ? 
O134 Dy8 O120 72.3(4) . . ? 
O35 Dy8 O120 79.1(5) . . ? 
O27 Dy8 O120 138.8(5) . . ? 
O144 Dy8 O120 66.2(4) . . ? 
O39 Dy8 O120 74.4(5) . . ? 
O134 Dy8 O7 147.8(3) . . ? 
O35 Dy8 O7 123.3(4) . . ? 
O27 Dy8 O7 83.1(4) . . ? 
O144 Dy8 O7 76.4(3) . . ? 
O39 Dy8 O7 52.5(4) . . ? 
O120 Dy8 O7 92.6(3) . . ? 
O134 Dy8 O96 123.6(5) . . ? 
O35 Dy8 O96 74.2(5) . . ? 
O27 Dy8 O96 74.7(5) . . ? 
O144 Dy8 O96 144.2(5) . . ? 
O39 Dy8 O96 77.2(5) . . ? 
O120 Dy8 O96 145.9(5) . . ? 
O7 Dy8 O96 84.8(4) . . ? 
O134 Dy8 O49 71.6(5) . . ? 
O35 Dy8 O49 69.0(5) . . ? 
O27 Dy8 O49 67.9(6) . . ? 
O144 Dy8 O49 125.2(5) . . ? 
O39 Dy8 O49 121.9(5) . . ? 
O120 Dy8 O49 134.1(5) . . ? 
O7 Dy8 O49 132.3(4) . . ? 
O96 Dy8 O49 52.2(5) . . ? 
O134 Dy8 C209 152.9(3) . . ? 
O35 Dy8 C209 97.6(4) . . ? 
O27 Dy8 C209 107.3(4) . . ? 
O144 Dy8 C209 93.4(3) . . ? 
O39 Dy8 C209 26.2(4) . . ? 
O120 Dy8 C209 81.1(3) . . ? 
O7 Dy8 C209 26.371(12) . . ? 
O96 Dy8 C209 81.8(4) . . ? 
O49 Dy8 C209 133.8(4) . . ? 
O134 Dy8 C173 97.3(3) . . ? 
O35 Dy8 C173 69.9(4) . . ? 
O27 Dy8 C173 68.6(4) . . ? 
O144 Dy8 C173 139.9(3) . . ? 
O39 Dy8 C173 100.4(4) . . ? 
O120 Dy8 C173 148.4(3) . . ? 
O7 Dy8 C173 109.09(4) . . ? 
O96 Dy8 C173 26.5(4) . . ? 
O49 Dy8 C173 25.7(4) . . ? 
C209 Dy8 C173 108.26(4) . . ? 
O134 Dy8 Dy6 37.4(3) . . ? 
O35 Dy8 Dy6 65.1(4) . . ? 
O27 Dy8 Dy6 125.9(4) . . ? 
O144 Dy8 Dy6 77.1(3) . . ? 
O39 Dy8 Dy6 103.9(4) . . ? 
O120 Dy8 Dy6 39.2(3) . . ? 
O7 Dy8 Dy6 131.40(4) . . ? 
O96 Dy8 Dy6 136.0(4) . . ? 
O49 Dy8 Dy6 96.2(4) . . ? 
C209 Dy8 Dy6 118.57(4) . . ? 
C173 Dy8 Dy6 117.43(4) . . ? 
O43 Dy14 O149 146.3(5) . . ? 
O43 Dy14 O122 80.8(5) . . ? 
O149 Dy14 O122 72.7(4) . . ? 
O43 Dy14 O104 135.4(5) . . ? 
O149 Dy14 O104 77.3(4) . . ? 
O122 Dy14 O104 139.5(4) . . ? 
O43 Dy14 O65 72.2(5) . . ? 
O149 Dy14 O65 137.1(5) . . ? 
O122 Dy14 O65 112.0(5) . . ? 
O104 Dy14 O65 73.7(5) . . ? 
O43 Dy14 O115 116.6(5) . . ? 
O149 Dy14 O115 71.8(4) . . ? 
O122 Dy14 O115 67.5(4) . . ? 
O104 Dy14 O115 77.7(5) . . ? 
O65 Dy14 O115 71.7(5) . . ? 
O43 Dy14 O139 76.2(5) . . ? 
O149 Dy14 O139 78.5(4) . . ? 
O122 Dy14 O139 78.4(4) . . ? 
O104 Dy14 O139 121.5(5) . . ? 
O65 Dy14 O139 144.1(5) . . ? 
O115 Dy14 O139 139.8(4) . . ? 
O43 Dy14 O9 84.4(5) . . ? 
O149 Dy14 O9 106.4(4) . . ? 
O122 Dy14 O9 146.0(5) . . ? 
O104 Dy14 O9 68.8(5) . . ? 
O65 Dy14 O9 91.9(5) . . ? 
O115 Dy14 O9 145.8(5) . . ? 
O139 Dy14 O9 68.4(5) . . ? 
O43 Dy14 Dy13 109.1(4) . . ? 
O149 Dy14 Dy13 38.5(3) . . ? 
O122 Dy14 Dy13 37.5(3) . . ? 
O104 Dy14 Dy13 115.4(3) . . ? 
O65 Dy14 Dy13 143.7(4) . . ? 
O115 Dy14 Dy13 76.2(3) . . ? 
O139 Dy14 Dy13 63.7(3) . . ? 
O9 Dy14 Dy13 124.4(3) . . ? 
O43 Dy14 Dy15 152.1(4) . . ? 
O149 Dy14 Dy15 37.9(3) . . ? 
O122 Dy14 Dy15 77.7(3) . . ? 
O104 Dy14 Dy15 61.9(3) . . ? 
O65 Dy14 Dy15 99.7(4) . . ? 
O115 Dy14 Dy15 37.6(3) . . ? 
O139 Dy14 Dy15 116.1(3) . . ? 
O9 Dy14 Dy15 123.1(3) . . ? 
Dy13 Dy14 Dy15 61.47(3) . . ? 
O43 Dy14 Dy16 93.0(4) . . ? 
O149 Dy14 Dy16 77.0(3) . . ? 
O122 Dy14 Dy16 34.9(3) . . ? 
O104 Dy14 Dy16 111.9(3) . . ? 
O65 Dy14 Dy16 85.3(4) . . ? 
O115 Dy14 Dy16 34.4(3) . . ? 
O139 Dy14 Dy16 113.1(3) . . ? 
O9 Dy14 Dy16 176.6(3) . . ? 
Dy13 Dy14 Dy16 58.54(3) . . ? 
Dy15 Dy14 Dy16 59.26(3) . . ? 
O135 Dy7 O37 146.8(5) . . ? 
O135 Dy7 O109 74.4(5) . . ? 
O37 Dy7 O109 111.2(5) . . ? 
O135 Dy7 O144 71.9(4) . . ? 
O37 Dy7 O144 86.9(5) . . ? 
O109 Dy7 O144 140.0(5) . . ? 
O135 Dy7 O134 72.1(4) . . ? 
O37 Dy7 O134 77.3(5) . . ? 
O109 Dy7 O134 77.6(5) . . ? 
O144 Dy7 O134 71.9(4) . . ? 
O135 Dy7 O145 130.3(5) . . ? 
O37 Dy7 O145 78.6(5) . . ? 
O109 Dy7 O145 67.3(5) . . ? 
O144 Dy7 O145 152.7(4) . . ? 
O134 Dy7 O145 125.8(5) . . ? 
O135 Dy7 O103 118.5(5) . . ? 
O37 Dy7 O103 75.8(5) . . ? 
O109 Dy7 O103 146.3(5) . . ? 
O144 Dy7 O103 71.2(4) . . ? 
O134 Dy7 O103 135.0(5) . . ? 
O145 Dy7 O103 82.8(4) . . ? 
O135 Dy7 O142 75.3(4) . . ? 
O37 Dy7 O142 136.5(5) . . ? 
O109 Dy7 O142 85.4(5) . . ? 
O144 Dy7 O142 106.0(4) . . ? 
O134 Dy7 O142 146.2(4) . . ? 
O145 Dy7 O142 71.3(4) . . ? 
O103 Dy7 O142 70.0(4) . . ? 
O135 Dy7 Dy5 37.5(3) . . ? 
O37 Dy7 Dy5 125.2(4) . . ? 
O109 Dy7 Dy5 112.0(3) . . ? 
O144 Dy7 Dy5 38.4(3) . . ? 
O134 Dy7 Dy5 80.6(3) . . ? 
O145 Dy7 Dy5 150.2(3) . . ? 
O103 Dy7 Dy5 86.2(3) . . ? 
O142 Dy7 Dy5 78.9(3) . . ? 
O135 Dy7 Dy6 37.3(3) . . ? 
O37 Dy7 Dy6 114.1(4) . . ? 
O109 Dy7 Dy6 63.2(3) . . ? 
O144 Dy7 Dy6 76.9(3) . . ? 
O134 Dy7 Dy6 36.9(3) . . ? 
O145 Dy7 Dy6 130.1(3) . . ? 
O103 Dy7 Dy6 146.1(3) . . ? 
O142 Dy7 Dy6 109.3(3) . . ? 
Dy5 Dy7 Dy6 61.25(3) . . ? 
O135 Dy7 Dy8 79.2(3) . . ? 
O37 Dy7 Dy8 68.5(4) . . ? 
O109 Dy7 Dy8 113.6(4) . . ? 
O144 Dy7 Dy8 38.9(3) . . ? 
O134 Dy7 Dy8 36.2(3) . . ? 
O145 Dy7 Dy8 145.0(3) . . ? 
O103 Dy7 Dy8 99.8(3) . . ? 
O142 Dy7 Dy8 142.5(3) . . ? 
Dy5 Dy7 Dy8 64.21(3) . . ? 
Dy6 Dy7 Dy8 59.21(3) . . ? 
O135 Dy7 Dy3 107.7(3) . . ? 
O37 Dy7 Dy3 105.5(4) . . ? 
O109 Dy7 Dy3 79.0(4) . . ? 
O144 Dy7 Dy3 131.8(3) . . ? 
O134 Dy7 Dy3 155.7(3) . . ? 
O145 Dy7 Dy3 35.9(3) . . ? 
O103 Dy7 Dy3 67.5(3) . . ? 
O142 Dy7 Dy3 36.3(3) . . ? 
Dy5 Dy7 Dy3 114.49(4) . . ? 
Dy6 Dy7 Dy3 132.50(4) . . ? 
Dy8 Dy7 Dy3 167.17(4) . . ? 
O147 Dy19 O72 149.7(6) . . ? 
O147 Dy19 O73 137.7(5) . . ? 
O72 Dy19 O73 70.6(6) . . ? 
O147 Dy19 O138 72.4(4) . . ? 
O72 Dy19 O138 85.5(6) . . ? 
O73 Dy19 O138 115.6(5) . . ? 
O147 Dy19 O112 78.0(5) . . ? 
O72 Dy19 O112 129.7(6) . . ? 
O73 Dy19 O112 72.9(5) . . ? 
O138 Dy19 O112 142.3(5) . . ? 
O147 Dy19 O130 73.5(5) . . ? 
O72 Dy19 O130 118.0(5) . . ? 
O73 Dy19 O130 72.1(5) . . ? 
O138 Dy19 O130 68.8(5) . . ? 
O112 Dy19 O130 80.8(5) . . ? 
O147 Dy19 O98 78.3(4) . . ? 
O72 Dy19 O98 76.9(5) . . ? 
O73 Dy19 O98 143.1(5) . . ? 
O138 Dy19 O98 77.9(5) . . ? 
O112 Dy19 O98 118.6(5) . . ? 
O130 Dy19 O98 141.3(5) . . ? 
O147 Dy19 O100 103.0(4) . . ? 
O72 Dy19 O100 81.6(5) . . ? 
O73 Dy19 O100 93.6(5) . . ? 
O138 Dy19 O100 141.8(4) . . ? 
O112 Dy19 O100 67.3(4) . . ? 
O130 Dy19 O100 147.9(5) . . ? 
O98 Dy19 O100 64.2(4) . . ? 
O147 Dy19 Dy17 37.6(3) . . ? 
O72 Dy19 Dy17 114.2(5) . . ? 
O73 Dy19 Dy17 146.5(4) . . ? 
O138 Dy19 Dy17 37.6(3) . . ? 
O112 Dy19 Dy17 115.5(3) . . ? 
O130 Dy19 Dy17 77.3(3) . . ? 
O98 Dy19 Dy17 64.3(3) . . ? 
O100 Dy19 Dy17 119.8(3) . . ? 
O147 Dy19 Dy18 39.6(3) . . ? 
O72 Dy19 Dy18 154.8(4) . . ? 
O73 Dy19 Dy18 99.0(4) . . ? 
O138 Dy19 Dy18 78.4(3) . . ? 
O112 Dy19 Dy18 63.9(3) . . ? 
O130 Dy19 Dy18 37.7(3) . . ? 
O98 Dy19 Dy18 117.7(3) . . ? 
O100 Dy19 Dy18 122.7(3) . . ? 
Dy17 Dy19 Dy18 61.96(3) . . ? 
O147 Dy19 Dy20 77.4(3) . . ? 
O72 Dy19 Dy20 97.1(4) . . ? 
O73 Dy19 Dy20 87.4(4) . . ? 
O138 Dy19 Dy20 36.3(3) . . ? 
O112 Dy19 Dy20 114.6(3) . . ? 
O130 Dy19 Dy20 34.1(3) . . ? 
O98 Dy19 Dy20 114.0(3) . . ? 
O100 Dy19 Dy20 178.0(3) . . ? 
Dy17 Dy19 Dy20 59.32(3) . . ? 
Dy18 Dy19 Dy20 58.75(3) . . ? 
O59 Dy25 O6 91.0(4) . . ? 
O59 Dy25 O150 157.6(5) . . ? 
O6 Dy25 O150 73.4(3) . . ? 
O59 Dy25 O15 73.8(6) . . ? 
O6 Dy25 O15 76.6(5) . . ? 
O150 Dy25 O15 86.8(5) . . ? 
O59 Dy25 O81 116.5(5) . . ? 
O6 Dy25 O81 132.0(3) . . ? 
O150 Dy25 O81 67.2(4) . . ? 
O15 Dy25 O81 75.0(6) . . ? 
O59 Dy25 O111 133.6(5) . . ? 
O6 Dy25 O111 104.3(3) . . ? 
O150 Dy25 O111 67.3(4) . . ? 
O15 Dy25 O111 152.1(5) . . ? 
O81 Dy25 O111 84.9(5) . . ? 
O59 Dy25 O70 73.5(6) . . ? 
O6 Dy25 O70 72.9(4) . . ? 
O150 Dy25 O70 115.2(5) . . ? 
O15 Dy25 O70 134.2(6) . . ? 
O81 Dy25 O70 149.5(5) . . ? 
O111 Dy25 O70 69.9(5) . . ? 
O59 Dy25 O140 88.2(5) . . ? 
O6 Dy25 O140 144.1(3) . . ? 
O150 Dy25 O140 113.9(4) . . ? 
O15 Dy25 O140 136.7(6) . . ? 
O81 Dy25 O140 78.9(4) . . ? 
O111 Dy25 O140 54.2(4) . . ? 
O70 Dy25 O140 72.5(5) . . ? 
O59 Dy25 N30 111.6(4) . . ? 
O6 Dy25 N30 125.20(4) . . ? 
O150 Dy25 N30 90.7(3) . . ? 
O15 Dy25 N30 156.2(5) . . ? 
O81 Dy25 N30 82.2(3) . . ? 
O111 Dy25 N30 26.5(3) . . ? 
O70 Dy25 N30 67.6(4) . . ? 
O140 Dy25 N30 27.8(3) . . ? 
O59 Dy25 Dy5 157.3(4) . . ? 
O6 Dy25 Dy5 79.68(3) . . ? 
O150 Dy25 Dy5 36.5(3) . . ? 
O15 Dy25 Dy5 123.0(4) . . ? 
O81 Dy25 Dy5 84.4(3) . . ? 
O111 Dy25 Dy5 33.9(3) . . ? 
O70 Dy25 Dy5 83.9(4) . . ? 
O140 Dy25 Dy5 87.5(3) . . ? 
N30 Dy25 Dy5 60.18(3) . . ? 
O59 Dy25 Dy15 142.2(4) . . ? 
O6 Dy25 Dy15 99.28(4) . . ? 
O150 Dy25 Dy15 32.7(3) . . ? 
O15 Dy25 Dy15 73.5(4) . . ? 
O81 Dy25 Dy15 35.5(3) . . ? 
O111 Dy25 Dy15 78.9(3) . . ? 
O70 Dy25 Dy15 144.2(4) . . ? 
O140 Dy25 Dy15 103.1(3) . . ? 
N30 Dy25 Dy15 91.85(4) . . ? 
Dy5 Dy25 Dy15 60.27(3) . . ? 
O41 Dy22 O110 135.4(6) . . ? 
O41 Dy22 O21 75.8(7) . . ? 
O110 Dy22 O21 147.5(6) . . ? 
O41 Dy22 O109 123.3(5) . . ? 
O110 Dy22 O109 78.0(5) . . ? 
O21 Dy22 O109 75.1(5) . . ? 
O41 Dy22 O145 154.7(5) . . ? 
O110 Dy22 O145 67.0(4) . . ? 
O21 Dy22 O145 85.4(6) . . ? 
O109 Dy22 O145 65.9(4) . . ? 
O41 Dy22 O69 79.0(6) . . ? 
O110 Dy22 O69 128.8(5) . . ? 
O21 Dy22 O69 53.9(5) . . ? 
O109 Dy22 O69 118.0(5) . . ? 
O145 Dy22 O69 76.3(5) . . ? 
O41 Dy22 O47 79.7(6) . . ? 
O110 Dy22 O47 75.3(5) . . ? 
O21 Dy22 O47 128.4(5) . . ? 
O109 Dy22 O47 153.0(5) . . ? 
O145 Dy22 O47 99.7(5) . . ? 
O69 Dy22 O47 77.3(5) . . ? 
O41 Dy22 O112 79.4(5) . . ? 
O110 Dy22 O112 87.8(5) . . ? 
O21 Dy22 O112 90.8(5) . . ? 
O109 Dy22 O112 53.7(4) . . ? 
O145 Dy22 O112 118.1(4) . . ? 
O69 Dy22 O112 142.2(5) . . ? 
O47 Dy22 O112 128.2(5) . . ? 
O41 Dy22 C162 73.2(5) . . ? 
O110 Dy22 C162 148.0(3) . . ? 
O21 Dy22 C162 27.0(4) . . ? 
O109 Dy22 C162 98.3(3) . . ? 
O145 Dy22 C162 82.4(3) . . ? 
O69 Dy22 C162 27.1(4) . . ? 
O47 Dy22 C162 102.3(3) . . ? 
O112 Dy22 C162 116.0(3) . . ? 
O41 Dy22 O100 86.2(5) . . ? 
O110 Dy22 O100 50.4(4) . . ? 
O21 Dy22 O100 150.9(5) . . ? 
O109 Dy22 O100 97.0(4) . . ? 
O145 Dy22 O100 117.3(4) . . ? 
O69 Dy22 O100 144.7(5) . . ? 
O47 Dy22 O100 68.5(4) . . ? 
O112 Dy22 O100 63.2(4) . . ? 
C162 Dy22 O100 158.9(3) . . ? 
O41 Dy22 N33 101.7(4) . . ? 
O110 Dy22 N33 82.9(3) . . ? 
O21 Dy22 N33 81.1(4) . . ? 
O109 Dy22 N33 26.3(3) . . ? 
O145 Dy22 N33 91.7(3) . . ? 
O69 Dy22 N33 133.8(4) . . ? 
O47 Dy22 N33 148.8(3) . . ? 
O112 Dy22 N33 27.4(3) . . ? 
C162 Dy22 N33 107.95(4) . . ? 
O100 Dy22 N33 80.4(3) . . ? 
O41 Dy22 Dy3 157.9(5) . . ? 
O110 Dy22 Dy3 33.9(3) . . ? 
O21 Dy22 Dy3 120.7(5) . . ? 
O109 Dy22 Dy3 77.4(3) . . ? 
O145 Dy22 Dy3 35.2(3) . . ? 
O69 Dy22 Dy3 98.6(4) . . ? 
O47 Dy22 Dy3 78.4(4) . . ? 
O112 Dy22 Dy3 112.7(3) . . ? 
C162 Dy22 Dy3 114.08(4) . . ? 
O100 Dy22 Dy3 83.5(3) . . ? 
N33 Dy22 Dy3 95.74(3) . . ? 
O124 Dy11 O87 84.1(5) . . ? 
O124 Dy11 O66 79.7(5) . . ? 
O87 Dy11 O66 123.1(6) . . ? 
O124 Dy11 O151 72.4(4) . . ? 
O87 Dy11 O151 75.8(5) . . ? 
O66 Dy11 O151 144.5(5) . . ? 
O124 Dy11 O17 120.3(5) . . ? 
O87 Dy11 O17 75.4(6) . . ? 
O66 Dy11 O17 67.3(5) . . ? 
O151 Dy11 O17 146.9(5) . . ? 
O124 Dy11 O152 72.9(4) . . ? 
O87 Dy11 O152 142.6(5) . . ? 
O66 Dy11 O152 82.0(5) . . ? 
O151 Dy11 O152 69.3(4) . . ? 
O17 Dy11 O152 141.7(5) . . ? 
O124 Dy11 O48 151.0(5) . . ? 
O87 Dy11 O48 80.8(5) . . ? 
O66 Dy11 O48 129.2(5) . . ? 
O151 Dy11 O48 80.0(5) . . ? 
O17 Dy11 O48 79.5(5) . . ? 
O152 Dy11 O48 105.5(5) . . ? 
O124 Dy11 O28 143.9(5) . . ? 
O87 Dy11 O28 131.8(5) . . ? 
O66 Dy11 O28 81.7(5) . . ? 
O151 Dy11 O28 108.7(5) . . ? 
O17 Dy11 O28 79.3(6) . . ? 
O152 Dy11 O28 74.0(5) . . ? 
O48 Dy11 O28 54.4(5) . . ? 
O124 Dy11 C146 159.1(3) . . ? 
O87 Dy11 C146 107.8(4) . . ? 
O66 Dy11 C146 106.2(4) . . ? 
O151 Dy11 C146 93.5(3) . . ? 
O17 Dy11 C146 79.9(4) . . ? 
O152 Dy11 C146 87.8(3) . . ? 
O48 Dy11 C146 27.9(4) . . ? 
O28 Dy11 C146 26.6(4) . . ? 
O124 Dy11 Dy10 38.2(3) . . ? 
O87 Dy11 Dy10 121.7(4) . . ? 
O66 Dy11 Dy10 66.5(4) . . ? 
O151 Dy11 Dy10 78.0(3) . . ? 
O17 Dy11 Dy10 132.0(4) . . ? 
O152 Dy11 Dy10 38.1(3) . . ? 
O48 Dy11 Dy10 142.6(4) . . ? 
O28 Dy11 Dy10 105.7(4) . . ? 
C146 Dy11 Dy10 125.02(4) . . ? 
O124 Dy11 Dy12 37.3(3) . . ? 
O87 Dy11 Dy12 67.7(4) . . ? 
O66 Dy11 Dy12 116.9(4) . . ? 
O151 Dy11 Dy12 37.4(3) . . ? 
O17 Dy11 Dy12 137.4(5) . . ? 
O152 Dy11 Dy12 76.3(3) . . ? 
O48 Dy11 Dy12 113.7(4) . . ? 
O28 Dy11 Dy12 142.1(4) . . ? 
C146 Dy11 Dy12 130.84(4) . . ? 
Dy10 Dy11 Dy12 60.09(3) . . ? 
O124 Dy11 Dy9 77.8(3) . . ? 
O87 Dy11 Dy9 111.8(4) . . ? 
O66 Dy11 Dy9 117.2(4) . . ? 
O151 Dy11 Dy9 36.0(3) . . ? 
O17 Dy11 Dy9 161.6(5) . . ? 
O152 Dy11 Dy9 35.4(3) . . ? 
O48 Dy11 Dy9 85.0(4) . . ? 
O28 Dy11 Dy9 83.7(4) . . ? 
C146 Dy11 Dy9 81.72(3) . . ? 
Dy10 Dy11 Dy9 59.82(3) . . ? 
Dy12 Dy11 Dy9 58.60(3) . . ? 
O71 Dy24 O113 78.4(5) . . ? 
O71 Dy24 O97 130.3(5) . . ? 
O113 Dy24 O97 150.4(5) . . ? 
O71 Dy24 O157 155.6(5) . . ? 
O113 Dy24 O157 89.6(5) . . ? 
O97 Dy24 O157 66.2(4) . . ? 
O71 Dy24 O132 128.2(5) . . ? 
O113 Dy24 O132 76.1(5) . . ? 
O97 Dy24 O132 78.9(5) . . ? 
O157 Dy24 O132 67.5(4) . . ? 
O71 Dy24 O104 81.6(5) . . ? 
O113 Dy24 O104 140.4(5) . . ? 
O97 Dy24 O104 54.4(4) . . ? 
O157 Dy24 O104 119.7(4) . . ? 
O132 Dy24 O104 90.5(4) . . ? 
O71 Dy24 O61 78.1(5) . . ? 
O113 Dy24 O61 78.7(5) . . ? 
O97 Dy24 O61 110.8(5) . . ? 
O157 Dy24 O61 78.8(5) . . ? 
O132 Dy24 O61 137.5(5) . . ? 
O104 Dy24 O61 129.5(5) . . ? 
O71 Dy24 O3 80.9(4) . . ? 
O113 Dy24 O3 130.9(4) . . ? 
O97 Dy24 O3 69.4(4) . . ? 
O157 Dy24 O3 91.5(3) . . ? 
O132 Dy24 O3 147.2(3) . . ? 
O104 Dy24 O3 77.9(3) . . ? 
O61 Dy24 O3 53.6(3) . . ? 
O71 Dy24 O9 81.2(5) . . ? 
O113 Dy24 O9 80.7(5) . . ? 
O97 Dy24 O9 95.5(5) . . ? 
O157 Dy24 O9 118.1(4) . . ? 
O132 Dy24 O9 50.7(4) . . ? 
O104 Dy24 O9 62.7(4) . . ? 
O61 Dy24 O9 153.2(4) . . ? 
O3 Dy24 O9 138.6(3) . . ? 
O71 Dy24 C232 77.7(4) . . ? 
O113 Dy24 C232 105.6(4) . . ? 
O97 Dy24 C232 89.8(4) . . ? 
O157 Dy24 C232 85.3(3) . . ? 
O132 Dy24 C232 152.8(3) . . ? 
O104 Dy24 C232 102.9(3) . . ? 
O61 Dy24 C232 27.6(3) . . ? 
O3 Dy24 C232 25.995(14) . . ? 
O9 Dy24 C232 156.1(3) . . ? 
O71 Dy24 N38 105.8(4) . . ? 
O113 Dy24 N38 159.9(4) . . ? 
O97 Dy24 N38 26.7(3) . . ? 
O157 Dy24 N38 92.8(3) . . ? 
O132 Dy24 N38 86.5(3) . . ? 
O104 Dy24 N38 28.0(3) . . ? 
O61 Dy24 N38 121.2(3) . . ? 
O3 Dy24 N38 68.94(3) . . ? 
O9 Dy24 N38 80.7(3) . . ? 
C232 Dy24 N38 94.46(3) . . ? 
O71 Dy24 Dy6 148.2(4) . . ? 
O113 Dy24 Dy6 126.3(3) . . ? 
O97 Dy24 Dy6 32.8(3) . . ? 
O157 Dy24 Dy6 36.7(3) . . ? 
O132 Dy24 Dy6 81.2(3) . . ? 
O104 Dy24 Dy6 86.8(3) . . ? 
O61 Dy24 Dy6 87.0(3) . . ? 
O3 Dy24 Dy6 67.72(3) . . ? 
O9 Dy24 Dy6 119.2(3) . . ? 
C232 Dy24 Dy6 76.23(3) . . ? 
N38 Dy24 Dy6 58.86(2) . . ? 
O97 Dy6 O146 104.6(5) . . ? 
O97 Dy6 O134 142.7(5) . . ? 
O146 Dy6 O134 99.7(5) . . ? 
O97 Dy6 O84 143.7(5) . . ? 
O146 Dy6 O84 73.2(5) . . ? 
O134 Dy6 O84 70.6(5) . . ? 
O97 Dy6 O11 84.2(5) . . ? 
O146 Dy6 O11 138.4(5) . . ? 
O134 Dy6 O11 96.1(4) . . ? 
O84 Dy6 O11 76.3(5) . . ? 
O97 Dy6 O135 72.4(4) . . ? 
O146 Dy6 O135 144.3(5) . . ? 
O134 Dy6 O135 71.3(4) . . ? 
O84 Dy6 O135 130.3(5) . . ? 
O11 Dy6 O135 77.3(4) . . ? 
O97 Dy6 O120 86.8(5) . . ? 
O146 Dy6 O120 74.3(5) . . ? 
O134 Dy6 O120 73.0(5) . . ? 
O84 Dy6 O120 125.2(5) . . ? 
O11 Dy6 O120 147.4(4) . . ? 
O135 Dy6 O120 70.1(4) . . ? 
O97 Dy6 O157 66.3(4) . . ? 
O146 Dy6 O157 74.3(5) . . ? 
O134 Dy6 O157 149.0(5) . . ? 
O84 Dy6 O157 78.7(5) . . ? 
O11 Dy6 O157 72.4(4) . . ? 
O135 Dy6 O157 130.4(4) . . ? 
O120 Dy6 O157 131.1(4) . . ? 
O97 Dy6 Dy8 126.5(3) . . ? 
O146 Dy6 Dy8 74.3(3) . . ? 
O134 Dy6 Dy8 36.9(3) . . ? 
O84 Dy6 Dy8 88.5(3) . . ? 
O11 Dy6 Dy8 132.5(3) . . ? 
O135 Dy6 Dy8 79.5(3) . . ? 
O120 Dy6 Dy8 40.4(3) . . ? 
O157 Dy6 Dy8 148.4(3) . . ? 
O97 Dy6 Dy7 108.3(3) . . ? 
O146 Dy6 Dy7 134.1(3) . . ? 
O134 Dy6 Dy7 37.3(3) . . ? 
O84 Dy6 Dy7 96.8(3) . . ? 
O11 Dy6 Dy7 76.8(3) . . ? 
O135 Dy6 Dy7 36.1(3) . . ? 
O120 Dy6 Dy7 76.4(3) . . ? 
O157 Dy6 Dy7 149.1(3) . . ? 
Dy8 Dy6 Dy7 60.43(3) . . ? 
O97 Dy6 Dy5 66.9(3) . . ? 
O146 Dy6 Dy5 109.1(4) . . ? 
O134 Dy6 Dy5 78.7(3) . . ? 
O84 Dy6 Dy5 149.0(3) . . ? 
O11 Dy6 Dy5 111.7(3) . . ? 
O135 Dy6 Dy5 36.0(3) . . ? 
O120 Dy6 Dy5 36.8(3) . . ? 
O157 Dy6 Dy5 132.2(3) . . ? 
Dy8 Dy6 Dy5 63.70(3) . . ? 
Dy7 Dy6 Dy5 58.63(3) . . ? 
O97 Dy6 Dy24 34.0(3) . . ? 
O146 Dy6 Dy24 80.0(3) . . ? 
O134 Dy6 Dy24 175.3(3) . . ? 
O84 Dy6 Dy24 113.7(3) . . ? 
O11 Dy6 Dy24 87.2(3) . . ? 
O135 Dy6 Dy24 106.2(3) . . ? 
O120 Dy6 Dy24 102.4(3) . . ? 
O157 Dy6 Dy24 35.5(3) . . ? 
Dy8 Dy6 Dy24 139.32(4) . . ? 
Dy7 Dy6 Dy24 141.16(4) . . ? 
Dy5 Dy6 Dy24 96.89(3) . . ? 
O8 Dy16 O115 110.0(6) . . ? 
O8 Dy16 O153 140.3(5) . . ? 
O115 Dy16 O153 70.0(4) . . ? 
O8 Dy16 O67 138.9(5) . . ? 
O115 Dy16 O67 80.5(5) . . ? 
O153 Dy16 O67 80.8(5) . . ? 
O8 Dy16 O93 80.1(6) . . ? 
O115 Dy16 O93 146.1(5) . . ? 
O153 Dy16 O93 123.1(5) . . ? 
O67 Dy16 O93 72.2(5) . . ? 
O8 Dy16 O16 84.8(7) . . ? 
O115 Dy16 O16 141.4(5) . . ? 
O153 Dy16 O16 76.1(5) . . ? 
O67 Dy16 O16 112.0(6) . . ? 
O93 Dy16 O16 69.7(6) . . ? 
O8 Dy16 O122 71.9(5) . . ? 
O115 Dy16 O122 67.5(4) . . ? 
O153 Dy16 O122 72.1(4) . . ? 
O67 Dy16 O122 143.4(4) . . ? 
O93 Dy16 O122 143.8(5) . . ? 
O16 Dy16 O122 85.1(5) . . ? 
O8 Dy16 O13 74.8(6) . . ? 
O115 Dy16 O13 75.5(5) . . ? 
O153 Dy16 O13 137.5(5) . . ? 
O67 Dy16 O13 69.6(6) . . ? 
O93 Dy16 O13 76.4(6) . . ? 
O16 Dy16 O13 142.9(6) . . ? 
O122 Dy16 O13 116.3(6) . . ? 
O8 Dy16 Dy13 101.9(4) . . ? 
O115 Dy16 Dy13 76.6(3) . . ? 
O153 Dy16 Dy13 38.4(3) . . ? 
O67 Dy16 Dy13 119.2(3) . . ? 
O93 Dy16 Dy13 134.5(4) . . ? 
O16 Dy16 Dy13 65.3(4) . . ? 
O122 Dy16 Dy13 37.7(3) . . ? 
O13 Dy16 Dy13 148.7(5) . . ? 
O8 Dy16 Dy15 142.1(5) . . ? 
O115 Dy16 Dy15 36.5(3) . . ? 
O153 Dy16 Dy15 36.7(3) . . ? 
O67 Dy16 Dy15 67.2(3) . . ? 
O93 Dy16 Dy15 136.8(4) . . ? 
O16 Dy16 Dy15 112.8(4) . . ? 
O122 Dy16 Dy15 76.4(3) . . ? 
O13 Dy16 Dy15 102.0(4) . . ? 
Dy13 Dy16 Dy15 61.05(3) . . ? 
O8 Dy16 Dy14 84.0(5) . . ? 
O115 Dy16 Dy14 35.1(3) . . ? 
O153 Dy16 Dy14 75.5(3) . . ? 
O67 Dy16 Dy14 115.6(3) . . ? 
O93 Dy16 Dy14 161.4(4) . . ? 
O16 Dy16 Dy14 118.4(4) . . ? 
O122 Dy16 Dy14 34.3(3) . . ? 
O13 Dy16 Dy14 90.3(5) . . ? 
Dy13 Dy16 Dy14 58.47(3) . . ? 
Dy15 Dy16 Dy14 58.19(3) . . ? 
O105 Dy9 O158 73.6(4) . . ? 
O105 Dy9 O152 138.3(4) . . ? 
O158 Dy9 O152 70.5(4) . . ? 
O105 Dy9 O88 95.9(5) . . ? 
O158 Dy9 O88 145.0(5) . . ? 
O152 Dy9 O88 101.4(5) . . ? 
O105 Dy9 O94 148.6(5) . . ? 
O158 Dy9 O94 129.5(5) . . ? 
O152 Dy9 O94 72.9(4) . . ? 
O88 Dy9 O94 75.6(5) . . ? 
O105 Dy9 O10 91.7(4) . . ? 
O158 Dy9 O10 75.6(4) . . ? 
O152 Dy9 O10 99.1(4) . . ? 
O88 Dy9 O10 139.0(4) . . ? 
O94 Dy9 O10 77.2(4) . . ? 
O105 Dy9 O151 79.5(5) . . ? 
O158 Dy9 O151 71.5(4) . . ? 
O152 Dy9 O151 69.7(4) . . ? 
O88 Dy9 O151 73.7(5) . . ? 
O94 Dy9 O151 124.8(5) . . ? 
O10 Dy9 O151 147.1(4) . . ? 
O105 Dy9 O133 68.5(4) . . ? 
O158 Dy9 O133 127.5(4) . . ? 
O152 Dy9 O133 152.7(4) . . ? 
O88 Dy9 O133 75.0(5) . . ? 
O94 Dy9 O133 80.0(4) . . ? 
O10 Dy9 O133 70.5(4) . . ? 
O151 Dy9 O133 132.1(4) . . ? 
O105 Dy9 Dy12 61.0(3) . . ? 
O158 Dy9 Dy12 36.9(3) . . ? 
O152 Dy9 Dy12 77.6(3) . . ? 
O88 Dy9 Dy12 108.7(4) . . ? 
O94 Dy9 Dy12 150.5(3) . . ? 
O10 Dy9 Dy12 110.2(3) . . ? 
O151 Dy9 Dy12 38.3(3) . . ? 
O133 Dy9 Dy12 129.5(3) . . ? 
O105 Dy9 Dy10 110.0(3) . . ? 
O158 Dy9 Dy10 36.5(3) . . ? 
O152 Dy9 Dy10 36.8(3) . . ? 
O88 Dy9 Dy10 136.0(4) . . ? 
O94 Dy9 Dy10 96.0(3) . . ? 
O10 Dy9 Dy10 76.7(3) . . ? 
O151 Dy9 Dy10 76.8(3) . . ? 
O133 Dy9 Dy10 147.1(3) . . ? 
Dy12 Dy9 Dy10 60.01(3) . . ? 
O105 Dy9 Dy11 114.5(3) . . ? 
O158 Dy9 Dy11 75.7(3) . . ? 
O152 Dy9 Dy11 35.9(3) . . ? 
O88 Dy9 Dy11 78.9(4) . . ? 
O94 Dy9 Dy11 93.8(3) . . ? 
O10 Dy9 Dy11 133.1(3) . . ? 
O151 Dy9 Dy11 35.9(3) . . ? 
O133 Dy9 Dy11 153.9(3) . . ? 
Dy12 Dy9 Dy11 59.80(3) . . ? 
Dy10 Dy9 Dy11 58.40(3) . . ? 
O105 Dy9 Dy1 83.4(3) . . ? 
O158 Dy9 Dy1 105.8(3) . . ? 
O152 Dy9 Dy1 126.2(3) . . ? 
O88 Dy9 Dy1 106.0(3) . . ? 
O94 Dy9 Dy1 70.5(3) . . ? 
O10 Dy9 Dy1 35.1(3) . . ? 
O151 Dy9 Dy1 162.8(3) . . ? 
O133 Dy9 Dy1 36.2(3) . . ? 
Dy12 Dy9 Dy1 131.87(4) . . ? 
Dy10 Dy9 Dy1 111.57(4) . . ? 
Dy11 Dy9 Dy1 161.20(4) . . ? 
O75 Dy26 O123 128.2(5) . . ? 
O75 Dy26 O156 154.5(5) . . ? 
O123 Dy26 O156 67.0(4) . . ? 
O75 Dy26 O101 132.0(5) . . ? 
O123 Dy26 O101 79.0(5) . . ? 
O156 Dy26 O101 66.0(4) . . ? 
O75 Dy26 O40 80.3(6) . . ? 
O123 Dy26 O40 130.6(5) . . ? 
O156 Dy26 O40 75.1(5) . . ? 
O101 Dy26 O40 113.3(5) . . ? 
O75 Dy26 O53 76.6(5) . . ? 
O123 Dy26 O53 77.4(5) . . ? 
O156 Dy26 O53 89.2(5) . . ? 
O101 Dy26 O53 151.0(5) . . ? 
O40 Dy26 O53 71.5(6) . . ? 
O75 Dy26 O29 85.4(6) . . ? 
O123 Dy26 O29 145.5(5) . . ? 
O156 Dy26 O29 85.4(5) . . ? 
O101 Dy26 O29 70.7(6) . . ? 
O40 Dy26 O29 53.7(5) . . ? 
O53 Dy26 O29 124.4(6) . . ? 
O75 Dy26 O137 84.7(5) . . ? 
O123 Dy26 O137 90.2(5) . . ? 
O156 Dy26 O137 118.0(4) . . ? 
O101 Dy26 O137 53.0(4) . . ? 
O40 Dy26 O137 136.5(5) . . ? 
O53 Dy26 O137 143.0(5) . . ? 
O29 Dy26 O137 84.7(5) . . ? 
O75 Dy26 O125 79.2(5) . . ? 
O123 Dy26 O125 52.7(4) . . ? 
O156 Dy26 O125 119.6(4) . . ? 
O101 Dy26 O125 98.4(5) . . ? 
O40 Dy26 O125 148.3(5) . . ? 
O53 Dy26 O125 80.3(5) . . ? 
O29 Dy26 O125 146.8(5) . . ? 
O137 Dy26 O125 64.9(4) . . ? 
O75 Dy26 C84 83.1(4) . . ? 
O123 Dy26 C84 144.1(3) . . ? 
O156 Dy26 C84 77.6(3) . . ? 
O101 Dy26 C84 92.6(4) . . ? 
O40 Dy26 C84 25.3(4) . . ? 
O53 Dy26 C84 96.6(4) . . ? 
O29 Dy26 C84 28.4(4) . . ? 
O137 Dy26 C84 112.6(3) . . ? 
O125 Dy26 C84 162.2(3) . . ? 
O75 Dy26 N32 104.0(4) . . ? 
O123 Dy26 N32 25.6(3) . . ? 
O156 Dy26 N32 92.5(3) . . ? 
O101 Dy26 N32 90.0(4) . . ? 
O40 Dy26 N32 144.8(4) . . ? 
O53 Dy26 N32 75.6(4) . . ? 
O29 Dy26 N32 159.8(4) . . ? 
O137 Dy26 N32 78.5(3) . . ? 
O125 Dy26 N32 27.2(3) . . ? 
C84 Dy26 N32 167.68(4) . . ? 
O75 Dy26 N29 107.8(4) . . ? 
O123 Dy26 N29 86.0(4) . . ? 
O156 Dy26 N29 92.5(3) . . ? 
O101 Dy26 N29 26.8(3) . . ? 
O40 Dy26 N29 127.0(4) . . ? 
O53 Dy26 N29 161.1(4) . . ? 
O29 Dy26 N29 74.5(4) . . ? 
O137 Dy26 N29 26.4(3) . . ? 
O125 Dy26 N29 82.5(3) . . ? 
C84 Dy26 N29 102.08(4) . . ? 
N32 Dy26 N29 85.57(3) . . ? 
O92 Dy29 O76 142.2(5) . . ? 
O92 Dy29 O63 83.4(5) . . ? 
O76 Dy29 O63 91.8(6) . . ? 
O92 Dy29 O131 72.1(5) . . ? 
O76 Dy29 O131 94.4(5) . . ? 
O63 Dy29 O131 147.1(5) . . ? 
O92 Dy29 O116 68.4(5) . . ? 
O76 Dy29 O116 73.8(5) . . ? 
O63 Dy29 O116 79.1(5) . . ? 
O131 Dy29 O116 71.7(4) . . ? 
O92 Dy29 O25 73.5(5) . . ? 
O76 Dy29 O25 143.9(5) . . ? 
O63 Dy29 O25 99.5(6) . . ? 
O131 Dy29 O25 94.3(5) . . ? 
O116 Dy29 O25 141.8(5) . . ? 
O92 Dy29 O102 127.8(5) . . ? 
O76 Dy29 O102 75.8(5) . . ? 
O63 Dy29 O102 142.0(5) . . ? 
O131 Dy29 O102 70.6(5) . . ? 
O116 Dy29 O102 128.7(5) . . ? 
O25 Dy29 O102 74.3(5) . . ? 
O92 Dy29 N36 134.0(3) . . ? 
O76 Dy29 N36 76.3(4) . . ? 
O63 Dy29 N36 68.2(3) . . ? 
O131 Dy29 N36 144.5(3) . . ? 
O116 Dy29 N36 134.5(3) . . ? 
O25 Dy29 N36 76.4(4) . . ? 
O102 Dy29 N36 74.0(3) . . ? 
O92 Dy29 Dy30 38.7(3) . . ? 
O76 Dy29 Dy30 129.5(4) . . ? 
O63 Dy29 Dy30 122.0(4) . . ? 
O131 Dy29 Dy30 36.8(4) . . ? 
O116 Dy29 Dy30 77.2(3) . . ? 
O25 Dy29 Dy30 71.4(4) . . ? 
O102 Dy29 Dy30 92.1(3) . . ? 
N36 Dy29 Dy30 147.37(4) . . ? 
O92 Dy29 Dy27 76.6(3) . . ? 
O76 Dy29 Dy27 72.5(4) . . ? 
O63 Dy29 Dy27 117.3(4) . . ? 
O131 Dy29 Dy27 36.5(3) . . ? 
O116 Dy29 Dy27 38.2(3) . . ? 
O25 Dy29 Dy27 128.8(4) . . ? 
O102 Dy29 Dy27 93.3(4) . . ? 
N36 Dy29 Dy27 148.38(4) . . ? 
Dy30 Dy29 Dy27 59.34(3) . . ? 
O92 Dy29 Dy28 35.4(3) . . ? 
O76 Dy29 Dy28 108.1(4) . . ? 
O63 Dy29 Dy28 70.0(3) . . ? 
O131 Dy29 Dy28 77.4(3) . . ? 
O116 Dy29 Dy28 35.3(3) . . ? 
O25 Dy29 Dy28 108.0(4) . . ? 
O102 Dy29 Dy28 147.9(3) . . ? 
N36 Dy29 Dy28 138.08(4) . . ? 
Dy30 Dy29 Dy28 60.37(3) . . ? 
Dy27 Dy29 Dy28 59.60(3) . . ? 
O123 Dy13 O122 147.3(4) . . ? 
O123 Dy13 O154 89.4(5) . . ? 
O122 Dy13 O154 100.4(4) . . ? 
O123 Dy13 O106 91.3(5) . . ? 
O122 Dy13 O106 101.3(5) . . ? 
O154 Dy13 O106 138.0(5) . . ? 
O123 Dy13 O153 82.3(5) . . ? 
O122 Dy13 O153 72.4(4) . . ? 
O154 Dy13 O153 146.7(4) . . ? 
O106 Dy13 O153 74.7(5) . . ? 
O123 Dy13 O149 81.4(5) . . ? 
O122 Dy13 O149 71.2(4) . . ? 
O154 Dy13 O149 75.8(4) . . ? 
O106 Dy13 O149 145.7(5) . . ? 
O153 Dy13 O149 71.2(4) . . ? 
O123 Dy13 O22 141.9(5) . . ? 
O122 Dy13 O22 70.9(5) . . ? 
O154 Dy13 O22 79.2(5) . . ? 
O106 Dy13 O22 74.7(6) . . ? 
O153 Dy13 O22 125.4(5) . . ? 
O149 Dy13 O22 129.2(5) . . ? 
O123 Dy13 O156 66.0(4) . . ? 
O122 Dy13 O156 146.7(4) . . ? 
O154 Dy13 O156 71.6(5) . . ? 
O106 Dy13 O156 70.4(5) . . ? 
O153 Dy13 O156 131.4(5) . . ? 
O149 Dy13 O156 133.3(4) . . ? 
O22 Dy13 O156 75.8(5) . . ? 
O123 Dy13 Dy14 118.3(4) . . ? 
O122 Dy13 Dy14 37.4(3) . . ? 
O154 Dy13 Dy14 76.9(3) . . ? 
O106 Dy13 Dy14 136.9(4) . . ? 
O153 Dy13 Dy14 78.9(3) . . ? 
O149 Dy13 Dy14 36.9(3) . . ? 
O22 Dy13 Dy14 94.6(4) . . ? 
O156 Dy13 Dy14 148.2(3) . . ? 
O123 Dy13 Dy16 120.4(3) . . ? 
O122 Dy13 Dy16 38.4(3) . . ? 
O154 Dy13 Dy16 137.7(3) . . ? 
O106 Dy13 Dy16 75.3(4) . . ? 
O153 Dy13 Dy16 38.1(3) . . ? 
O149 Dy13 Dy16 79.7(3) . . ? 
O22 Dy13 Dy16 90.7(4) . . ? 
O156 Dy13 Dy16 145.4(3) . . ? 
Dy14 Dy13 Dy16 62.99(3) . . ? 
O123 Dy13 Dy15 71.4(3) . . ? 
O122 Dy13 Dy15 76.0(3) . . ? 
O154 Dy13 Dy15 110.9(3) . . ? 
O106 Dy13 Dy15 109.1(4) . . ? 
O153 Dy13 Dy15 36.1(3) . . ? 
O149 Dy13 Dy15 36.9(3) . . ? 
O22 Dy13 Dy15 146.7(4) . . ? 
O156 Dy13 Dy15 137.3(3) . . ? 
Dy14 Dy13 Dy15 59.32(3) . . ? 
Dy16 Dy13 Dy15 60.03(3) . . ? 
O123 Dy13 Dy10 80.3(3) . . ? 
O122 Dy13 Dy10 124.8(3) . . ? 
O154 Dy13 Dy10 35.9(3) . . ? 
O106 Dy13 Dy10 103.1(4) . . ? 
O153 Dy13 Dy10 162.3(3) . . ? 
O149 Dy13 Dy10 108.5(3) . . ? 
O22 Dy13 Dy10 69.2(4) . . ? 
O156 Dy13 Dy10 36.4(3) . . ? 
Dy14 Dy13 Dy10 111.87(4) . . ? 
Dy16 Dy13 Dy10 159.16(4) . . ? 
Dy15 Dy13 Dy10 136.98(4) . . ? 
O32 Dy21 O108 127.6(5) . . ? 
O32 Dy21 O133 154.8(5) . . ? 
O108 Dy21 O133 67.9(4) . . ? 
O32 Dy21 O89 80.9(6) . . ? 
O108 Dy21 O89 149.8(5) . . ? 
O133 Dy21 O89 89.7(5) . . ? 
O32 Dy21 O105 129.2(5) . . ? 
O108 Dy21 O105 79.6(5) . . ? 
O133 Dy21 O105 68.7(4) . . ? 
O89 Dy21 O105 73.3(5) . . ? 
O32 Dy21 O26 77.0(6) . . ? 
O108 Dy21 O26 114.8(5) . . ? 
O133 Dy21 O26 78.2(5) . . ? 
O89 Dy21 O26 77.8(6) . . ? 
O105 Dy21 O26 135.5(5) . . ? 
O32 Dy21 O36 80.8(6) . . ? 
O108 Dy21 O36 70.8(5) . . ? 
O133 Dy21 O36 87.9(5) . . ? 
O89 Dy21 O36 130.6(6) . . ? 
O105 Dy21 O36 147.7(5) . . ? 
O26 Dy21 O36 53.5(5) . . ? 
O32 Dy21 O98 83.3(5) . . ? 
O108 Dy21 O98 85.6(5) . . ? 
O133 Dy21 O98 120.1(4) . . ? 
O89 Dy21 O98 89.0(5) . . ? 
O105 Dy21 O98 53.8(4) . . ? 
O26 Dy21 O98 157.7(5) . . ? 
O36 Dy21 O98 133.4(5) . . ? 
O32 Dy21 O100 77.2(5) . . ? 
O108 Dy21 O100 52.4(4) . . ? 
O133 Dy21 O100 120.2(4) . . ? 
O89 Dy21 O100 146.2(5) . . ? 
O105 Dy21 O100 101.6(4) . . ? 
O26 Dy21 O100 120.9(5) . . ? 
O36 Dy21 O100 70.5(5) . . ? 
O98 Dy21 O100 63.3(4) . . ? 
O32 Dy21 C155 76.0(4) . . ? 
O108 Dy21 C155 94.5(3) . . ? 
O133 Dy21 C155 83.5(3) . . ? 
O89 Dy21 C155 103.1(4) . . ? 
O105 Dy21 C155 151.8(3) . . ? 
O26 Dy21 C155 25.9(4) . . ? 
O36 Dy21 C155 27.7(4) . . ? 
O98 Dy21 C155 153.9(3) . . ? 
O100 Dy21 C155 96.2(3) . . ? 
O32 Dy21 N28 108.4(4) . . ? 
O108 Dy21 N28 79.9(3) . . ? 
O133 Dy21 N28 93.2(3) . . ? 
O89 Dy21 N28 81.5(4) . . ? 
O105 Dy21 N28 26.1(3) . . ? 
O26 Dy21 N28 157.5(4) . . ? 
O36 Dy21 N28 147.9(4) . . ? 
O98 Dy21 N28 27.8(3) . . ? 
O100 Dy21 N28 81.4(3) . . ? 
C155 Dy21 N28 174.23(4) . . ? 
O32 Dy21 N27 102.1(4) . . ? 
O108 Dy21 N27 25.9(3) . . ? 
O133 Dy21 N27 93.2(3) . . ? 
O89 Dy21 N27 164.6(4) . . ? 
O105 Dy21 N27 93.7(3) . . ? 
O26 Dy21 N27 117.6(4) . . ? 
O36 Dy21 N27 64.7(4) . . ? 
O98 Dy21 N27 76.5(3) . . ? 
O100 Dy21 N27 27.0(3) . . ? 
C155 Dy21 N27 92.26(3) . . ? 
N28 Dy21 N27 83.21(3) . . ? 
O129 Dy23 O50 79.7(6) . . ? 
O129 Dy23 O155 75.4(5) . . ? 
O50 Dy23 O155 128.8(5) . . ? 
O129 Dy23 O85 151.8(5) . . ? 
O50 Dy23 O85 125.0(5) . . ? 
O155 Dy23 O85 77.8(5) . . ? 
O129 Dy23 O148 95.1(5) . . ? 
O50 Dy23 O148 158.0(5) . . ? 
O155 Dy23 O148 69.0(4) . . ? 
O85 Dy23 O148 66.9(4) . . ? 
O129 Dy23 O31 81.2(5) . . ? 
O50 Dy23 O31 84.3(5) . . ? 
O155 Dy23 O31 133.4(5) . . ? 
O85 Dy23 O31 112.0(5) . . ? 
O148 Dy23 O31 73.8(5) . . ? 
O129 Dy23 O139 129.8(5) . . ? 
O50 Dy23 O139 80.9(5) . . ? 
O155 Dy23 O139 81.9(4) . . ? 
O85 Dy23 O139 53.3(4) . . ? 
O148 Dy23 O139 117.5(4) . . ? 
O31 Dy23 O139 141.6(5) . . ? 
O129 Dy23 O12 132.1(5) . . ? 
O50 Dy23 O12 84.8(6) . . ? 
O155 Dy23 O12 143.4(5) . . ? 
O85 Dy23 O12 69.5(5) . . ? 
O148 Dy23 O12 83.0(5) . . ? 
O31 Dy23 O12 52.2(5) . . ? 
O139 Dy23 O12 91.2(5) . . ? 
O129 Dy23 C125 108.1(4) . . ? 
O50 Dy23 C125 85.6(4) . . ? 
O155 Dy23 C125 144.7(3) . . ? 
O85 Dy23 C125 89.0(3) . . ? 
O148 Dy23 C125 75.6(3) . . ? 
O31 Dy23 C125 27.2(4) . . ? 
O139 Dy23 C125 116.0(3) . . ? 
O12 Dy23 C125 25.1(4) . . ? 
O129 Dy23 N34 148.7(4) . . ? 
O50 Dy23 N34 103.2(4) . . ? 
O155 Dy23 N34 79.1(3) . . ? 
O85 Dy23 N34 26.6(3) . . ? 
O148 Dy23 N34 92.3(3) . . ? 
O31 Dy23 N34 130.0(4) . . ? 
O139 Dy23 N34 26.7(3) . . ? 
O12 Dy23 N34 78.9(4) . . ? 
C125 Dy23 N34 103.17(3) . . ? 
O129 Dy23 Dy17 74.5(4) . . ? 
O50 Dy23 Dy17 152.9(4) . . ? 
O155 Dy23 Dy17 35.4(3) . . ? 
O85 Dy23 Dy17 78.6(3) . . ? 
O148 Dy23 Dy17 36.2(3) . . ? 
O31 Dy23 Dy17 99.7(4) . . ? 
O139 Dy23 Dy17 109.5(3) . . ? 
O12 Dy23 Dy17 119.0(4) . . ? 
C125 Dy23 Dy17 110.17(4) . . ? 
N34 Dy23 Dy17 94.69(3) . . ? 
O129 Dy23 Dy12 129.0(4) . . ? 
O50 Dy23 Dy12 147.8(4) . . ? 
O155 Dy23 Dy12 78.5(3) . . ? 
O85 Dy23 Dy12 34.5(3) . . ? 
O148 Dy23 Dy12 34.3(3) . . ? 
O31 Dy23 Dy12 86.3(4) . . ? 
O139 Dy23 Dy12 87.7(3) . . ? 
O12 Dy23 Dy12 65.3(4) . . ? 
C125 Dy23 Dy12 72.49(3) . . ? 
N34 Dy23 Dy12 61.08(3) . . ? 
Dy17 Dy23 Dy12 59.23(3) . . ? 
O14 Dy27 O68 95.2(5) . . ? 
O14 Dy27 O131 144.4(5) . . ? 
O68 Dy27 O131 88.7(5) . . ? 
O14 Dy27 O136 83.2(5) . . ? 
O68 Dy27 O136 142.4(5) . . ? 
O131 Dy27 O136 72.7(5) . . ? 
O14 Dy27 O57 93.9(6) . . ? 
O68 Dy27 O57 146.7(6) . . ? 
O131 Dy27 O57 102.0(5) . . ? 
O136 Dy27 O57 70.6(5) . . ? 
O14 Dy27 O116 75.6(5) . . ? 
O68 Dy27 O116 73.7(5) . . ? 
O131 Dy27 O116 71.5(4) . . ? 
O136 Dy27 O116 69.5(5) . . ? 
O57 Dy27 O116 139.6(5) . . ? 
O14 Dy27 O19 143.0(6) . . ? 
O68 Dy27 O19 79.0(6) . . ? 
O131 Dy27 O19 72.6(5) . . ? 
O136 Dy27 O19 123.2(6) . . ? 
O57 Dy27 O19 74.5(6) . . ? 
O116 Dy27 O19 134.8(5) . . ? 
O14 Dy27 N35 71.1(4) . . ? 
O68 Dy27 N35 79.8(4) . . ? 
O131 Dy27 N35 144.1(4) . . ? 
O136 Dy27 N35 133.3(3) . . ? 
O57 Dy27 N35 73.0(4) . . ? 
O116 Dy27 N35 134.9(3) . . ? 
O19 Dy27 N35 71.8(4) . . ? 
O14 Dy27 Dy30 121.6(4) . . ? 
O68 Dy27 Dy30 124.8(4) . . ? 
O131 Dy27 Dy30 37.2(3) . . ? 
O136 Dy27 Dy30 38.8(3) . . ? 
O57 Dy27 Dy30 75.4(4) . . ? 
O116 Dy27 Dy30 77.5(3) . . ? 
O19 Dy27 Dy30 90.0(4) . . ? 
N35 Dy27 Dy30 146.74(4) . . ? 
O14 Dy27 Dy29 113.2(4) . . ? 
O68 Dy27 Dy29 68.5(4) . . ? 
O131 Dy27 Dy29 36.8(3) . . ? 
O136 Dy27 Dy29 77.7(3) . . ? 
O57 Dy27 Dy29 135.1(4) . . ? 
O116 Dy27 Dy29 37.7(3) . . ? 
O19 Dy27 Dy29 98.7(4) . . ? 
N35 Dy27 Dy29 148.19(5) . . ? 
Dy30 Dy27 Dy29 60.04(3) . . ? 
O14 Dy27 Dy28 66.4(4) . . ? 
O68 Dy27 Dy28 109.8(4) . . ? 
O131 Dy27 Dy28 78.9(4) . . ? 
O136 Dy27 Dy28 35.7(3) . . ? 
O57 Dy27 Dy28 103.3(4) . . ? 
O116 Dy27 Dy28 36.7(3) . . ? 
O19 Dy27 Dy28 150.0(4) . . ? 
N35 Dy27 Dy28 137.06(4) . . ? 
Dy30 Dy27 Dy28 61.13(3) . . ? 
Dy29 Dy27 Dy28 61.15(3) . . ? 
O136 Dy28 O77 145.8(5) . . ? 
O136 Dy28 O116 71.7(5) . . ? 
O77 Dy28 O116 80.6(5) . . ? 
O136 Dy28 O46 92.6(5) . . ? 
O77 Dy28 O46 98.1(6) . . ? 
O116 Dy28 O46 143.5(5) . . ? 
O136 Dy28 O92 71.1(5) . . ? 
O77 Dy28 O92 80.4(5) . . ? 
O116 Dy28 O92 68.7(5) . . ? 
O46 Dy28 O92 75.2(5) . . ? 
O136 Dy28 O38 95.0(5) . . ? 
O77 Dy28 O38 96.5(6) . . ? 
O116 Dy28 O38 74.1(5) . . ? 
O46 Dy28 O38 141.5(5) . . ? 
O92 Dy28 O38 142.7(5) . . ? 
O136 Dy28 O34 143.3(5) . . ? 
O77 Dy28 O34 71.0(5) . . ? 
O116 Dy28 O34 135.4(5) . . ? 
O46 Dy28 O34 75.8(5) . . ? 
O92 Dy28 O34 135.3(5) . . ? 
O38 Dy28 O34 75.7(5) . . ? 
O136 Dy28 O95 70.5(5) . . ? 
O77 Dy28 O95 143.6(5) . . ? 
O116 Dy28 O95 125.3(5) . . ? 
O46 Dy28 O95 75.9(5) . . ? 
O92 Dy28 O95 130.0(5) . . ? 
O38 Dy28 O95 71.3(5) . . ? 
O34 Dy28 O95 72.8(5) . . ? 
O136 Dy28 Dy27 37.0(3) . . ? 
O77 Dy28 Dy27 118.3(4) . . ? 
O116 Dy28 Dy27 37.7(3) . . ? 
O46 Dy28 Dy27 128.1(4) . . ? 
O92 Dy28 Dy27 76.2(3) . . ? 
O38 Dy28 Dy27 72.8(4) . . ? 
O34 Dy28 Dy27 148.0(4) . . ? 
O95 Dy28 Dy27 91.3(4) . . ? 
O136 Dy28 Dy30 36.3(3) . . ? 
O77 Dy28 Dy30 117.8(4) . . ? 
O116 Dy28 Dy30 76.0(3) . . ? 
O46 Dy28 Dy30 72.5(4) . . ? 
O92 Dy28 Dy30 37.4(3) . . ? 
O38 Dy28 Dy30 129.3(4) . . ? 
O34 Dy28 Dy30 147.9(4) . . ? 
O95 Dy28 Dy30 94.9(4) . . ? 
Dy27 Dy28 Dy30 58.63(3) . . ? 
O136 Dy28 Dy29 76.8(3) . . ? 
O77 Dy28 Dy29 69.0(4) . . ? 
O116 Dy28 Dy29 35.8(3) . . ? 
O46 Dy28 Dy29 109.5(4) . . ? 
O92 Dy28 Dy29 35.1(3) . . ? 
O38 Dy28 Dy29 109.0(4) . . ? 
O34 Dy28 Dy29 139.9(4) . . ? 
O95 Dy28 Dy29 147.2(4) . . ? 
Dy27 Dy28 Dy29 59.25(3) . . ? 
Dy30 Dy28 Dy29 58.59(3) . . ? 
O18 Dy20 O78 92.7(7) . . ? 
O18 Dy20 O130 96.0(6) . . ? 
O78 Dy20 O130 141.8(5) . . ? 
O18 Dy20 O79 146.8(6) . . ? 
O78 Dy20 O79 97.5(6) . . ? 
O130 Dy20 O79 95.2(5) . . ? 
O18 Dy20 O118 139.1(5) . . ? 
O78 Dy20 O118 78.6(5) . . ? 
O130 Dy20 O118 70.5(5) . . ? 
O79 Dy20 O118 74.1(5) . . ? 
O18 Dy20 O138 69.1(5) . . ? 
O78 Dy20 O138 81.9(5) . . ? 
O130 Dy20 O138 66.9(4) . . ? 
O79 Dy20 O138 143.6(5) . . ? 
O118 Dy20 O138 70.1(4) . . ? 
O18 Dy20 O51 77.8(6) . . ? 
O78 Dy20 O51 145.9(5) . . ? 
O130 Dy20 O51 72.2(5) . . ? 
O79 Dy20 O51 76.1(5) . . ? 
O118 Dy20 O51 129.1(5) . . ? 
O138 Dy20 O51 123.0(5) . . ? 
O18 Dy20 O55 77.6(6) . . ? 
O78 Dy20 O55 70.2(5) . . ? 
O130 Dy20 O55 148.1(5) . . ? 
O79 Dy20 O55 76.5(5) . . ? 
O118 Dy20 O55 133.2(5) . . ? 
O138 Dy20 O55 135.0(5) . . ? 
O51 Dy20 O55 75.8(5) . . ? 
O18 Dy20 Dy18 130.9(5) . . ? 
O78 Dy20 Dy18 116.3(4) . . ? 
O130 Dy20 Dy18 37.0(3) . . ? 
O79 Dy20 Dy18 71.2(3) . . ? 
O118 Dy20 Dy18 37.7(3) . . ? 
O138 Dy20 Dy18 76.5(3) . . ? 
O51 Dy20 Dy18 93.6(4) . . ? 
O55 Dy20 Dy18 147.5(4) . . ? 
O18 Dy20 Dy17 103.2(4) . . ? 
O78 Dy20 Dy17 66.0(4) . . ? 
O130 Dy20 Dy17 75.8(3) . . ? 
O79 Dy20 Dy17 109.8(4) . . ? 
O118 Dy20 Dy17 36.7(3) . . ? 
O138 Dy20 Dy17 36.9(3) . . ? 
O51 Dy20 Dy17 147.9(4) . . ? 
O55 Dy20 Dy17 136.2(4) . . ? 
Dy18 Dy20 Dy17 60.97(3) . . ? 
O18 Dy20 Dy19 74.3(5) . . ? 
O78 Dy20 Dy19 116.0(4) . . ? 
O130 Dy20 Dy19 34.1(3) . . ? 
O79 Dy20 Dy19 127.1(4) . . ? 
O118 Dy20 Dy19 74.1(3) . . ? 
O138 Dy20 Dy19 34.5(3) . . ? 
O51 Dy20 Dy19 93.1(4) . . ? 
O55 Dy20 Dy19 151.4(3) . . ? 
Dy18 Dy20 Dy19 57.85(3) . . ? 
Dy17 Dy20 Dy19 57.51(3) . . ? 
O44 Dy30 O23 93.7(7) . . ? 
O44 Dy30 O86 140.5(6) . . ? 
O23 Dy30 O86 111.7(6) . . ? 
O44 Dy30 O131 91.2(5) . . ? 
O23 Dy30 O131 143.7(6) . . ? 
O86 Dy30 O131 85.7(5) . . ? 
O44 Dy30 O136 143.1(5) . . ? 
O23 Dy30 O136 82.1(6) . . ? 
O86 Dy30 O136 72.8(5) . . ? 
O131 Dy30 O136 72.7(5) . . ? 
O44 Dy30 O83 83.3(6) . . ? 
O23 Dy30 O83 72.4(6) . . ? 
O86 Dy30 O83 76.7(6) . . ? 
O131 Dy30 O83 143.9(5) . . ? 
O136 Dy30 O83 128.9(5) . . ? 
O44 Dy30 O92 74.5(5) . . ? 
O23 Dy30 O92 75.5(6) . . ? 
O86 Dy30 O92 139.6(5) . . ? 
O131 Dy30 O92 71.2(5) . . ? 
O136 Dy30 O92 68.9(5) . . ? 
O83 Dy30 O92 139.3(5) . . ? 
O44 Dy30 O20 70.0(6) . . ? 
O23 Dy30 O20 144.1(6) . . ? 
O86 Dy30 O20 71.9(5) . . ? 
O131 Dy30 O20 70.6(5) . . ? 
O136 Dy30 O20 130.1(5) . . ? 
O83 Dy30 O20 74.1(6) . . ? 
O92 Dy30 O20 126.2(5) . . ? 
O44 Dy30 Dy27 127.2(4) . . ? 
O23 Dy30 Dy27 120.5(5) . . ? 
O86 Dy30 Dy27 65.2(4) . . ? 
O131 Dy30 Dy27 37.3(3) . . ? 
O136 Dy30 Dy27 38.7(3) . . ? 
O83 Dy30 Dy27 141.8(4) . . ? 
O92 Dy30 Dy27 76.9(3) . . ? 
O20 Dy30 Dy27 93.9(4) . . ? 
O44 Dy30 Dy29 69.8(4) . . ? 
O23 Dy30 Dy29 112.8(5) . . ? 
O86 Dy30 Dy29 121.8(4) . . ? 
O131 Dy30 Dy29 37.2(3) . . ? 
O136 Dy30 Dy29 78.1(3) . . ? 
O83 Dy30 Dy29 152.7(4) . . ? 
O92 Dy30 Dy29 37.4(3) . . ? 
O20 Dy30 Dy29 91.9(4) . . ? 
Dy27 Dy30 Dy29 60.62(3) . . ? 
O44 Dy30 Dy28 110.1(4) . . ? 
O23 Dy30 Dy28 66.4(5) . . ? 
O86 Dy30 Dy28 107.7(4) . . ? 
O131 Dy30 Dy28 78.2(3) . . ? 
O136 Dy30 Dy28 35.1(3) . . ? 
O83 Dy30 Dy28 137.1(4) . . ? 
O92 Dy30 Dy28 36.5(3) . . ? 
O20 Dy30 Dy28 148.7(4) . . ? 
Dy27 Dy30 Dy28 60.24(3) . . ? 
Dy29 Dy30 Dy28 61.04(3) . . ? 
Dy4 O159 Dy1 104.9(4) . . ? 
Dy4 O159 Dy3 105.3(5) . . ? 
Dy1 O159 Dy3 106.5(4) . . ? 
Dy9 O158 Dy12 106.3(5) . . ? 
Dy9 O158 Dy10 107.4(5) . . ? 
Dy12 O158 Dy10 106.6(5) . . ? 
Dy24 O157 Dy18 111.1(5) . . ? 
Dy24 O157 Dy6 107.9(5) . . ? 
Dy18 O157 Dy6 106.7(4) . . ? 
Dy10 O156 Dy26 110.1(5) . . ? 
Dy10 O156 Dy13 106.2(5) . . ? 
Dy26 O156 Dy13 109.1(5) . . ? 
N37 O155 Dy23 109.3(7) . . ? 
N37 O155 Dy17 133.6(8) . . ? 
Dy23 O155 Dy17 109.7(5) . . ? 
N34 O154 Dy13 122.1(8) . . ? 
N34 O154 Dy10 116.9(8) . . ? 
Dy13 O154 Dy10 108.3(5) . . ? 
Dy15 O153 Dy16 106.3(5) . . ? 
Dy15 O153 Dy13 107.2(5) . . ? 
Dy16 O153 Dy13 103.5(5) . . ? 
Dy9 O152 Dy10 106.4(5) . . ? 
Dy9 O152 Dy11 108.7(5) . . ? 
Dy10 O152 Dy11 103.4(4) . . ? 
Dy11 O151 Dy9 108.2(5) . . ? 
Dy11 O151 Dy12 105.4(5) . . ? 
Dy9 O151 Dy12 103.4(5) . . ? 
Dy15 O150 Dy25 114.4(5) . . ? 
Dy15 O150 Dy5 110.8(5) . . ? 
Dy25 O150 Dy5 108.3(5) . . ? 
Dy14 O149 Dy15 105.4(5) . . ? 
Dy14 O149 Dy13 104.6(4) . . ? 
Dy15 O149 Dy13 105.9(5) . . ? 
Dy12 O148 Dy23 111.3(5) . . ? 
Dy12 O148 Dy17 107.5(5) . . ? 
Dy23 O148 Dy17 108.1(5) . . ? 
Dy19 O147 Dy17 105.5(5) . . ? 
Dy19 O147 Dy18 103.1(5) . . ? 
Dy17 O147 Dy18 106.2(5) . . ? 
C172 O146 Dy6 121.9(9) . . ? 
Dy3 O145 Dy7 107.8(5) . . ? 
Dy3 O145 Dy22 108.9(5) . . ? 
Dy7 O145 Dy22 110.1(5) . . ? 
Dy7 O144 Dy5 103.3(5) . . ? 
Dy7 O144 Dy8 103.5(5) . . ? 
Dy5 O144 Dy8 111.7(5) . . ? 
C165 O143 Dy15 124.5(9) . . ? 
N30 O142 Dy3 124.8(8) . . ? 
N30 O142 Dy7 115.7(8) . . ? 
Dy3 O142 Dy7 106.3(5) . . ? 
Dy1 O141 Dy3 110.6(5) . . ? 
Dy1 O141 Dy2 105.1(5) . . ? 
Dy3 O141 Dy2 100.9(5) . . ? 
N30 O140 Dy4 146.1(8) . . ? 
N30 O140 Dy25 92.3(6) . . ? 
Dy4 O140 Dy25 121.3(5) . . ? 
N34 O139 Dy14 138.5(8) . . ? 
N34 O139 Dy23 94.6(7) . . ? 
Dy14 O139 Dy23 119.9(5) . . ? 
Dy17 O138 Dy19 104.5(5) . . ? 
Dy17 O138 Dy20 103.9(5) . . ? 
Dy19 O138 Dy20 109.2(5) . . ? 
N29 O137 Dy4 139.7(8) . . ? 
N29 O137 Dy26 96.5(6) . . ? 
Dy4 O137 Dy26 115.0(5) . . ? 
Dy28 O136 Dy27 107.2(5) . . ? 
Dy28 O136 Dy30 108.6(5) . . ? 
Dy27 O136 Dy30 102.5(5) . . ? 
Dy7 O135 Dy5 105.5(5) . . ? 
Dy7 O135 Dy6 106.6(5) . . ? 
Dy5 O135 Dy6 107.3(5) . . ? 
Dy8 O134 Dy6 105.7(5) . . ? 
Dy8 O134 Dy7 106.7(5) . . ? 
Dy6 O134 Dy7 105.8(5) . . ? 
Dy21 O133 Dy1 108.3(5) . . ? 
Dy21 O133 Dy9 109.3(5) . . ? 
Dy1 O133 Dy9 107.0(5) . . ? 
N37 O132 Dy18 142.7(9) . . ? 
N37 O132 Dy24 104.2(7) . . ? 
Dy18 O132 Dy24 112.4(5) . . ? 
Dy30 O131 Dy27 105.5(5) . . ? 
Dy30 O131 Dy29 106.0(6) . . ? 
Dy27 O131 Dy29 106.7(5) . . ? 
Dy18 O130 Dy19 104.1(5) . . ? 
Dy18 O130 Dy20 105.5(5) . . ? 
Dy19 O130 Dy20 111.8(5) . . ? 
C174 O129 Dy23 158.1(11) . . ? 
C151 O128 Dy17 139.6(9) . . ? 
C193 O127 Dy1 128.7(10) . . ? 
N38 O126 Dy15 121.0(7) . . ? 
N38 O126 Dy5 121.6(7) . . ? 
Dy15 O126 Dy5 109.7(5) . . ? 
N32 O125 Dy4 136.7(9) . . ? 
N32 O125 Dy26 86.8(7) . . ? 
Dy4 O125 Dy26 103.3(5) . . ? 
Dy11 O124 Dy10 104.8(5) . . ? 
Dy11 O124 Dy12 106.8(5) . . ? 
Dy10 O124 Dy12 103.7(5) . . ? 
N32 O123 Dy13 138.8(9) . . ? 
N32 O123 Dy26 102.9(8) . . ? 
Dy13 O123 Dy26 115.5(6) . . ? 
Dy14 O122 Dy13 105.1(5) . . ? 
Dy14 O122 Dy16 110.8(5) . . ? 
Dy13 O122 Dy16 103.9(5) . . ? 
Dy2 O121 Dy1 107.9(5) . . ? 
Dy2 O121 Dy4 109.6(5) . . ? 
Dy1 O121 Dy4 104.1(5) . . ? 
Dy5 O120 Dy6 106.1(5) . . ? 
Dy5 O120 Dy8 110.7(5) . . ? 
Dy6 O120 Dy8 100.4(5) . . ? 
Dy17 O118 Dy18 108.9(5) . . ? 
Dy17 O118 Dy20 105.0(5) . . ? 
Dy18 O118 Dy20 103.3(5) . . ? 
Dy3 O117 Dy2 104.6(5) . . ? 
Dy3 O117 Dy4 104.9(5) . . ? 
Dy2 O117 Dy4 108.7(5) . . ? 
Dy28 O116 Dy29 108.9(5) . . ? 
Dy28 O116 Dy27 105.6(5) . . ? 
Dy29 O116 Dy27 104.1(5) . . ? 
Dy15 O115 Dy16 107.0(5) . . ? 
Dy15 O115 Dy14 103.9(5) . . ? 
Dy16 O115 Dy14 110.4(5) . . ? 
N28 O114 Dy17 125.7(8) . . ? 
N28 O114 Dy12 114.5(7) . . ? 
Dy17 O114 Dy12 106.8(5) . . ? 
N33 O112 Dy19 142.2(8) . . ? 
N33 O112 Dy22 92.4(7) . . ? 
Dy19 O112 Dy22 117.8(5) . . ? 
N30 O111 Dy5 149.5(9) . . ? 
N30 O111 Dy25 97.8(7) . . ? 
Dy5 O111 Dy25 111.1(5) . . ? 
N27 O110 Dy22 107.5(8) . . ? 
N27 O110 Dy3 137.1(9) . . ? 
Dy22 O110 Dy3 112.2(5) . . ? 
N33 O109 Dy7 150.1(9) . . ? 
N33 O109 Dy22 96.9(7) . . ? 
Dy7 O109 Dy22 112.8(5) . . ? 
N27 O108 Dy21 100.5(7) . . ? 
N27 O108 Dy1 134.9(8) . . ? 
Dy21 O108 Dy1 109.1(5) . . ? 
C219 O107 Dy10 136.9(9) . . ? 
C126 O106 Dy13 126.8(10) . . ? 
N28 O105 Dy9 148.8(9) . . ? 
N28 O105 Dy21 96.0(7) . . ? 
Dy9 O105 Dy21 112.4(5) . . ? 
N38 O104 Dy14 141.3(8) . . ? 
N38 O104 Dy24 93.0(7) . . ? 
Dy14 O104 Dy24 115.7(5) . . ? 
C178 O103 Dy7 128.4(9) . . ? 
N29 O101 Dy10 146.2(9) . . ? 
N29 O101 Dy26 100.1(7) . . ? 
Dy10 O101 Dy26 112.2(5) . . ? 
N27 O100 Dy19 137.3(8) . . ? 
N27 O100 Dy21 85.7(7) . . ? 
Dy19 O100 Dy21 103.5(5) . . ? 
N27 O100 Dy22 85.0(6) . . ? 
Dy19 O100 Dy22 98.2(4) . . ? 
Dy21 O100 Dy22 156.2(6) . . ? 
C167 O99 Dy1 137.6(9) . . ? 
N28 O98 Dy19 143.0(9) . . ? 
N28 O98 Dy21 90.7(7) . . ? 
Dy19 O98 Dy21 117.6(5) . . ? 
N38 O97 Dy6 144.8(9) . . ? 
N38 O97 Dy24 98.5(7) . . ? 
Dy6 O97 Dy24 113.2(5) . . ? 
C173 O96 Dy8 93.4(8) . . ? 
C167 O94 Dy9 134.9(9) . . ? 
Dy29 O92 Dy28 109.5(6) . . ? 
Dy29 O92 Dy30 103.9(5) . . ? 
Dy28 O92 Dy30 106.1(5) . . ? 
C156 O91 Dy5 133.5(9) . . ? 
C233 O90 Dy18 136.4(10) . . ? 
C158 O87 Dy11 134.7(9) . . ? 
C115 O86 Dy30 138.7(10) . . ? 
N34 O85 Dy12 150.1(9) . . ? 
N34 O85 Dy23 98.9(7) . . ? 
Dy12 O85 Dy23 111.0(5) . . ? 
C175 O84 Dy6 139.9(9) . . ? 
C178 O82 Dy3 132.0(9) . . ? 
N32 O81 Dy25 115.0(8) . . ? 
N32 O81 Dy15 133.6(8) . . ? 
Dy25 O81 Dy15 109.9(5) . . ? 
C245 O80 Dy4 139.0(10) . . ? 
C233 O79 Dy20 134.2(9) . . ? 
C111 O78 Dy20 140.2(9) . . ? 
C177 O77 Dy28 136.4(10) . . ? 
C143 O76 Dy29 135.4(9) . . ? 
C245 O75 Dy26 139.8(10) . . ? 
C156 O74 Dy15 138.5(8) . . ? 
C157 O73 Dy19 138.3(10) . . ? 
C61 O72 Dy19 134.5(11) . . ? 
C169 O71 Dy24 135.4(10) . . ? 
C162 O69 Dy22 89.3(8) . . ? 
C143 O68 Dy27 141.3(10) . . ? 
C165 O67 Dy16 138.0(9) . . ? 
C244 O66 Dy11 138.9(10) . . ? 
C169 O65 Dy14 138.9(9) . . ? 
C111 O64 Dy17 126.3(9) . . ? 
C177 O63 Dy29 135.4(9) . . ? 
C130 O62 Dy3 131.6(10) . . ? 
C232 O61 Dy24 90.8(7) . . ? 
C154 O60 Dy2 135.7(10) . . ? 
C153 O59 Dy25 133.7(10) . . ? 
C115 O57 Dy27 124.2(11) . . ? 
C244 O56 Dy10 125.7(9) . . ? 
C153 O54 Dy4 141.7(10) . . ? 
C151 O52 Dy12 129.6(9) . . ? 
C134 O50 Dy23 134.8(9) . . ? 
C173 O49 Dy8 91.9(8) . . ? 
C146 O48 Dy11 92.0(8) . . ? 
C56 O46 Dy28 127.5(10) . . ? 
C175 O45 Dy18 135.8(9) . . ? 
C88 O44 Dy30 138.7(10) . . ? 
C134 O43 Dy14 143.4(10) . . ? 
C193 O42 Dy2 145.1(10) . . ? 
C157 O41 Dy22 136.2(11) . . ? 
C84 O40 Dy26 94.2(9) . . ? 
C209 O39 Dy8 93.2(8) . . ? 
C142 O38 Dy28 128.4(10) . . ? 
C144 O37 Dy7 132.5(10) . . ? 
C155 O36 Dy21 89.3(8) . . ? 
C172 O35 Dy8 140.4(9) . . ? 
C158 O33 Dy12 124.7(10) . . ? 
C61 O32 Dy21 141.0(11) . . ? 
C125 O31 Dy23 92.9(8) . . ? 
C84 O29 Dy26 89.3(8) . . ? 
C146 O28 Dy11 90.8(9) . . ? 
C144 O27 Dy8 127.3(10) . . ? 
C155 O26 Dy21 91.7(8) . . ? 
C88 O25 Dy29 130.4(10) . . ? 
C130 O24 Dy2 139.8(10) . . ? 
C56 O23 Dy30 139.4(12) . . ? 
C219 O22 Dy13 135.3(9) . . ? 
C162 O21 Dy22 90.1(8) . . ? 
C36 O18 Dy20 139.0(13) . . ? 
C126 O16 Dy16 140.6(10) . . ? 
C142 O14 Dy27 141.4(10) . . ? 
C125 O12 Dy23 89.8(9) . . ? 
N33 O11 Dy6 121.2(8) . . ? 
N33 O11 Dy18 122.4(8) . . ? 
Dy6 O11 Dy18 107.5(4) . . ? 
N29 O10 Dy9 120.7(7) . . ? 
N29 O10 Dy1 120.2(8) . . ? 
Dy9 O10 Dy1 109.9(5) . . ? 
N37 O9 Dy14 140.6(9) . . ? 
N37 O9 Dy24 85.7(7) . . ? 
Dy14 O9 Dy24 101.3(5) . . ? 
C35 O8 Dy16 140.6(13) . . ? 
C145 C246 C164 121.2 . . ? 
C145 C246 C178 119.7 . . ? 
C164 C246 C178 119.1 . . ? 
O75 C245 O80 121.6(10) . . ? 
O75 C245 C140 125.1(7) . . ? 
O80 C245 C140 113.2(7) . . ? 
O66 C244 O56 126.7(10) . . ? 
O66 C244 C243 115.3(7) . . ? 
O56 C244 C243 118.0(7) . . ? 
C89 C243 C72 122.7 . . ? 
C89 C243 C244 122.8 . . ? 
C72 C243 C244 114.5 . . ? 
C170 C242 C80 120.7 . . ? 
C240 C241 C238 122.0 . . ? 
C240 C241 C174 121.7 . . ? 
C238 C241 C174 116.0 . . ? 
C241 C240 C65 123.6 . . ? 
C71 C239 C116 127.2 . . ? 
C71 C239 C134 113.0 . . ? 
C116 C239 C134 119.7 . . ? 
C241 C238 C85 114.6 . . ? 
C231 C237 C114 120.7 . . ? 
C231 C237 C144 120.4 . . ? 
C114 C237 C144 118.4 . . ? 
C138 C236 C21 118.0 . . ? 
N23 C235 C123 119.1 . . ? 
C49 C234 C159 118.0 . . ? 
O79 C233 O90 127.0(9) . . ? 
O79 C233 C141 117.1(7) . . ? 
O90 C233 C141 115.7(7) . . ? 
O3 C232 O61 123.3(6) . . ? 
O3 C232 C100 119.3 . . ? 
O61 C232 C100 117.4(6) . . ? 
O3 C232 Dy24 61.71(2) . . ? 
O61 C232 Dy24 61.6(6) . . ? 
C100 C232 Dy24 178.63(2) . . ? 
C223 C231 C237 120.8 . . ? 
C225 C230 C140 114.7 . . ? 
C140 C229 C202 116.4 . . ? 
C208 C228 C217 122.0 . . ? 
C208 C228 C84 109.3 . . ? 
C217 C228 C84 128.2 . . ? 
N15 C227 C205 125.0 . . ? 
C6 C226 C207 118.8 . . ? 
N47 C225 C230 127.8 . . ? 
C68 C224 C180 120.5 . . ? 
C231 C223 N12 121.9 . . ? 
C103 C222 C214 118.4 . . ? 
N20 C221 C107 121.9 . . ? 
C166 C220 C46 115.4 . . ? 
O107 C219 O22 124.6(9) . . ? 
O107 C219 C207 122.7(6) . . ? 
O22 C219 C207 112.2(6) . . ? 
C30 C218 C95 115.5 . . ? 
C188 C217 C228 114.5 . . ? 
C81 C216 C192 118.3 . . ? 
C19 C215 C189 118.7 . . ? 
C19 C215 C35 117.6 . . ? 
C189 C215 C35 122.6 . . ? 
N8 C214 C222 118.0 . . ? 
N6 C213 C18 130.2 . . ? 
C10 C212 C70 124.8 . . ? 
C13 C211 C197 105.9 . . ? 
C100 C210 C179 115.6 . . ? 
C209 O7 Dy8 92.29(3) . . ? 
O39 C209 O7 121.5(7) . . ? 
O39 C209 C92 117.4(7) . . ? 
O7 C209 C92 121.1 . . ? 
O39 C209 Dy8 60.6(7) . . ? 
O7 C209 Dy8 61.34(3) . . ? 
C92 C209 Dy8 174.99(2) . . ? 
C34 N50 C75 116.7 . . ? 
C201 N49 C188 121.2 . . ? 
C7 O6 Dy25 108.13(3) . . ? 
C40 N48 C17 119.3 . . ? 
C225 N47 C202 117.9 . . ? 
C90 N46 C51 122.4 . . ? 
C190 N45 C78 116.3 . . ? 
C20 N44 C24 112.8 . . ? 
C186 N43 C57 116.1 . . ? 
C25 N42 C180 123.8 . . ? 
C181 N41 C185 124.5 . . ? 
C201 C208 C228 119.2 . . ? 
C226 C207 C15 119.8 . . ? 
C226 C207 C219 118.3 . . ? 
C15 C207 C219 121.3 . . ? 
C53 C206 C168 126.9 . . ? 
C81 C205 C227 116.5 . . ? 
C60 C204 N20 124.3 . . ? 
C129 C203 C190 111.4 . . ? 
N47 C202 C229 123.2 . . ? 
N49 C201 C208 116.3 . . ? 
C181 C200 C132 122.0 . . ? 
C94 C199 N23 116.8 . . ? 
N11 C198 C42 119.7 . . ? 
C211 C197 C187 132.5 . . ? 
C211 C197 C126 109.6 . . ? 
C187 C197 C126 116.4 . . ? 
C196 N40 C21 116.0 . . ? 
N40 C196 C66 130.3 . . ? 
C101 C195 C184 118.9 . . ? 
C186 C194 C98 117.0 . . ? 
O127 C193 O42 125.9(9) . . ? 
O127 C193 C176 121.7(7) . . ? 
O42 C193 C176 112.4(7) . . ? 
N15 C192 C216 122.6 . . ? 
N2 C191 C187 136.5 . . ? 
N45 C190 C203 128.5 . . ? 
C20 C189 C215 114.1 . . ? 
C217 C188 N49 123.5 . . ? 
C197 C187 C191 102.4 . . ? 
N43 C186 C194 127.0 . . ? 
C22 C185 N41 112.9 . . ? 
N3 C184 C195 121.6 . . ? 
N3 C183 C31 127.9 . . ? 
N7 C182 C15 120.5 . . ? 
C200 C181 N41 117.0 . . ? 
N42 C180 C224 114.4 . . ? 
C26 N39 C14 122.4 . . ? 
C210 C179 N6 121.8 . . ? 
C7 O5 Dy5 141.00(3) . . ? 
O97 N38 O126 124.8(8) . . ? 
O97 N38 O104 113.2(8) . . ? 
O126 N38 O104 122.0(8) . . ? 
O97 N38 Dy24 54.8(6) . . ? 
O126 N38 Dy24 174.3(6) . . ? 
O104 N38 Dy24 59.1(6) . . ? 
O9 N37 O132 119.3(9) . . ? 
O9 N37 O155 119.7(9) . . ? 
O132 N37 O155 120.9(8) . . ? 
O103 C178 O82 123.4(8) . . ? 
O103 C178 C246 114.8(6) . . ? 
O82 C178 C246 121.6(6) . . ? 
O63 C177 O77 124.2(10) . . ? 
O63 C177 C81 117.1(7) . . ? 
O77 C177 C81 118.4(7) . . ? 
C112 N36 C152 122.1 . . ? 
C112 N36 Dy29 121.48(3) . . ? 
C152 N36 Dy29 116.37(3) . . ? 
C131 N35 C149 116.3 . . ? 
C131 N35 Dy27 119.77(3) . . ? 
C149 N35 Dy27 123.70(3) . . ? 
C147 C176 C93 116.7 . . ? 
C147 C176 C193 121.4 . . ? 
C93 C176 C193 121.9 . . ? 
O45 C175 O84 124.7(9) . . ? 
O45 C175 C171 123.0(7) . . ? 
O84 C175 C171 112.3(6) . . ? 
O58 C174 O129 124.9(10) . . ? 
O58 C174 C241 119.7(7) . . ? 
O129 C174 C241 114.3(7) . . ? 
O49 C173 O96 122.4(10) . . ? 
O49 C173 C163 117.7(7) . . ? 
O96 C173 C163 119.8(6) . . ? 
O49 C173 Dy8 62.4(7) . . ? 
O96 C173 Dy8 60.1(6) . . ? 
C163 C173 Dy8 179.20(2) . . ? 
O35 C172 O146 124.5(9) . . ? 
O35 C172 C117 123.3(7) . . ? 
O146 C172 C117 112.1(7) . . ? 
O154 N34 O139 124.2(8) . . ? 
O154 N34 O85 122.5(8) . . ? 
O139 N34 O85 113.2(8) . . ? 
O154 N34 Dy23 176.6(6) . . ? 
O139 N34 Dy23 58.7(6) . . ? 
O85 N34 Dy23 54.6(6) . . ? 
O109 N33 O11 121.4(9) . . ? 
O109 N33 O112 116.9(8) . . ? 
O11 N33 O112 121.6(8) . . ? 
O109 N33 Dy22 56.8(6) . . ? 
O11 N33 Dy22 176.4(6) . . ? 
O112 N33 Dy22 60.3(6) . . ? 
C67 C171 C42 122.7 . . ? 
C67 C171 C175 123.1 . . ? 
C42 C171 C175 114.1 . . ? 
O123 N32 O81 124.6(9) . . ? 
O123 N32 O125 117.1(9) . . ? 
O81 N32 O125 118.2(9) . . ? 
O123 N32 Dy26 51.5(6) . . ? 
O81 N32 Dy26 172.1(6) . . ? 
O125 N32 Dy26 66.0(6) . . ? 
C121 N31 C109 118.9 . . ? 
C242 C170 C108 116.4 . . ? 
C242 C170 C130 120.5 . . ? 
C108 C170 C130 123.1 . . ? 
O142 N30 O111 123.9(8) . . ? 
O142 N30 O140 120.6(8) . . ? 
O111 N30 O140 115.5(8) . . ? 
O142 N30 Dy25 175.5(6) . . ? 
O111 N30 Dy25 55.7(6) . . ? 
O140 N30 Dy25 59.9(5) . . ? 
O65 C169 O71 123.3(10) . . ? 
O65 C169 C138 119.6(6) . . ? 
O71 C169 C138 117.1(7) . . ? 
C206 C168 C55 114.4 . . ? 
C206 C168 C158 124.9 . . ? 
C55 C168 C158 120.6 . . ? 
O94 C167 O99 126.0(9) . . ? 
O94 C167 C159 121.0(6) . . ? 
O99 C167 C159 112.9(6) . . ? 
C220 C166 C106 122.2 . . ? 
C220 C166 C142 117.3 . . ? 
C106 C166 C142 120.2 . . ? 
O10 N29 O137 125.5(8) . . ? 
O10 N29 O101 124.6(8) . . ? 
O137 N29 O101 109.9(8) . . ? 
O10 N29 Dy26 174.9(6) . . ? 
O137 N29 Dy26 57.1(5) . . ? 
O101 N29 Dy26 53.1(6) . . ? 
O67 C165 O143 126.1(9) . . ? 
O67 C165 C137 115.6(6) . . ? 
O143 C165 C137 118.3(6) . . ? 
C109 C164 C246 118.1 . . ? 
O105 N28 O98 119.0(9) . . ? 
O105 N28 O114 124.1(8) . . ? 
O98 N28 O114 116.9(8) . . ? 
O105 N28 Dy21 57.9(6) . . ? 
O98 N28 Dy21 61.5(6) . . ? 
O114 N28 Dy21 173.9(6) . . ? 
C113 C163 C74 120.3 . . ? 
C113 C163 C173 122.4 . . ? 
C74 C163 C173 117.3 . . ? 
O21 C162 O69 125.6(10) . . ? 
O21 C162 C99 113.4(7) . . ? 
O69 C162 C99 120.6(7) . . ? 
O21 C162 Dy22 62.9(7) . . ? 
O69 C162 Dy22 63.6(7) . . ? 
C99 C162 Dy22 162.93(2) . . ? 
C110 C161 C96 115.7 . . ? 
C110 C161 C154 119.7 . . ? 
C96 C161 C154 124.6 . . ? 
C94 C160 C123 122.6 . . ? 
C94 C160 C153 118.7 . . ? 
C123 C160 C153 118.7 . . ? 
C234 C159 C139 117.5 . . ? 
C234 C159 C167 119.6 . . ? 
C139 C159 C167 122.9 . . ? 
O33 C158 O87 124.6(10) . . ? 
O33 C158 C168 122.4(8) . . ? 
O87 C158 C168 112.7(6) . . ? 
O41 C157 O73 129.2(11) . . ? 
O41 C157 C132 116.5(8) . . ? 
O73 C157 C132 114.3(7) . . ? 
O91 C156 O74 127.6(9) . . ? 
O91 C156 C135 118.0(6) . . ? 
O74 C156 C135 114.3(6) . . ? 
O26 C155 O36 125.1(10) . . ? 
O26 C155 C120 122.8(8) . . ? 
O36 C155 C120 112.0(7) . . ? 
O26 C155 Dy21 62.5(8) . . ? 
O36 C155 Dy21 63.0(7) . . ? 
C120 C155 Dy21 173.85(2) . . ? 
O108 N27 O110 123.3(8) . . ? 
O108 N27 O100 119.3(8) . . ? 
O110 N27 O100 117.1(9) . . ? 
O108 N27 Dy21 53.7(6) . . ? 
O110 N27 Dy21 161.6(6) . . ? 
O100 N27 Dy21 67.3(6) . . ? 
O4 C154 O60 124.7(7) . . ? 
O4 C154 C161 123.7 . . ? 
O60 C154 C161 111.5(7) . . ? 
O54 C153 O59 125.9(10) . . ? 
O54 C153 C160 121.2(7) . . ? 
O59 C153 C160 112.9(7) . . ? 
N36 C152 C74 118.2 . 3_376 ? 
O52 C151 O128 126.2(9) . . ? 
O52 C151 C95 116.0(6) . . ? 
O128 C151 C95 117.9(6) . . ? 
C136 C150 C90 114.7 . . ? 
C124 C149 N35 122.5 . . ? 
C141 C148 C77 114.4 . . ? 
C176 C147 C133 117.5 . . ? 
O28 C146 O48 122.2(10) . . ? 
O28 C146 C136 120.6(8) . . ? 
O48 C146 C136 117.1(7) . . ? 
O28 C146 Dy11 62.6(8) . . ? 
O48 C146 Dy11 60.1(7) . . ? 
C136 C146 Dy11 173.93(2) . . ? 
C246 C145 C121 115.8 . . ? 
O37 C144 O27 126.6(10) . . ? 
O37 C144 C237 117.8(7) . . ? 
O27 C144 C237 115.6(7) . . ? 
O76 C143 O68 120.4(9) . . ? 
O76 C143 C129 122.7(6) . . ? 
O68 C143 C129 116.7(6) . . ? 
O14 C142 O38 125.1(10) . . ? 
O14 C142 C166 121.1(7) . . ? 
O38 C142 C166 113.8(7) . . ? 
C122 C141 C148 120.8 . . ? 
C122 C141 C233 121.4 . . ? 
C148 C141 C233 117.7 . . ? 
C229 C140 C230 119.8 . . ? 
C229 C140 C245 125.0 . . ? 
C230 C140 C245 115.1 . . ? 
C128 C139 C159 123.3 . . ? 
C236 C138 C66 123.9 . . ? 
C236 C138 C169 117.9 . . ? 
C66 C138 C169 118.3 . . ? 
C48 C137 C91 122.5 . . ? 
C48 C137 C165 120.2 . . ? 
C91 C137 C165 117.3 . . ? 
C150 C136 C64 123.4 . . ? 
C150 C136 C146 120.9 . . ? 
C64 C136 C146 115.2 . . ? 
C59 C135 C104 122.7 . . ? 
C59 C135 C156 117.7 . . ? 
C104 C135 C156 119.0 . . ? 
O43 C134 O50 127.3(9) . . ? 
O43 C134 C239 119.6(7) . . ? 
O50 C134 C239 113.0(7) . . ? 
N25 C133 C147 126.0 . . ? 
C22 C132 C200 118.9 . . ? 
C22 C132 C157 124.2 . . ? 
C200 C132 C157 116.9 . . ? 
N35 C131 C127 125.9 . . ? 
O62 C130 O24 124.1(9) . . ? 
O62 C130 C170 115.1(7) . . ? 
O24 C130 C170 120.8(7) . . ? 
C44 C129 C203 122.1 . . ? 
C44 C129 C143 118.3 . . ? 
C203 C129 C143 119.3 . . ? 
C139 C128 N26 118.9 . . ? 
C117 C127 C131 114.8 . . ? 
O106 C126 O16 124.2(10) . . ? 
O106 C126 C197 113.6(7) . . ? 
O16 C126 C197 120.8(8) . . ? 
O12 C125 O31 124.6(11) . . ? 
O12 C125 C103 122.6(9) . . ? 
O31 C125 C103 112.8(7) . . ? 
O12 C125 Dy23 65.1(9) . . ? 
O31 C125 Dy23 59.9(7) . . ? 
C103 C125 Dy23 169.39(2) . . ? 
C149 C124 C117 115.1 . . ? 
C235 C123 C160 116.3 . . ? 
C86 C122 C141 118.5 . . ? 
N31 C121 C145 127.3 . . ? 
C107 C120 C60 118.9 . . ? 
C107 C120 C155 118.1 . . ? 
C60 C120 C155 122.9 . . ? 
C49 N26 C128 117.4 . . ? 
C62 N25 C133 114.8 . . ? 
C118 C119 C115 124.1 . . ? 
C118 C119 C87 112.4 . . ? 
C115 C119 C87 123.6 . . ? 
C105 N24 C46 116.9 . . ? 
C235 N23 C199 124.3 . . ? 
C97 C118 C119 121.9 . . ? 
C127 C117 C124 125.0 . . ? 
C127 C117 C172 120.9 . . ? 
C124 C117 C172 114.0 . . ? 
C75 C116 C239 113.5 . . ? 
O57 C115 O86 125.9(10) . . ? 
O57 C115 C119 120.4(7) . . ? 
O86 C115 C119 113.6(7) . . ? 
C237 C114 C58 117.0 . . ? 
C163 C113 C112 120.4 . 3_376 ? 
N36 C112 C113 119.7 . 3_376 ? 
O64 C111 O78 126.3(9) . . ? 
O64 C111 C98 120.4(7) . . ? 
O78 C111 C98 113.3(6) . . ? 
C161 C110 C76 120.0 . . ? 
N31 C109 C164 118.5 . . ? 
C79 C108 C170 120.0 . . ? 
C120 C107 C221 119.4 . . ? 
C166 C106 C105 118.3 . . ? 
N24 C105 C106 121.3 . . ? 
C135 C104 C26 114.7 . . ? 
C222 C103 C52 123.8 . . ? 
C222 C103 C125 114.1 . . ? 
C52 C103 C125 121.7 . . ? 
C232 O3 Dy24 92.30(3) . . ? 
C82 N22 C97 115.8 . . ? 
C57 C102 C98 123.6 . . ? 
C195 C101 C31 118.9 . . ? 
C195 C101 C88 122.2 . . ? 
C31 C101 C88 118.9 . . ? 
C210 C100 C18 122.9 . . ? 
C210 C100 C232 118.6 . . ? 
C18 C100 C232 117.9 . . ? 
C33 C99 C37 120.1 . . ? 
C33 C99 C162 122.7 . . ? 
C37 C99 C162 117.1 . . ? 
C102 C98 C194 117.5 . . ? 
C102 C98 C111 120.3 . . ? 
C194 C98 C111 121.1 . . ? 
C118 C97 N22 122.6 . . ? 
C161 C96 C63 114.7 . . ? 
C218 C95 C73 125.2 . . ? 
C218 C95 C151 118.2 . . ? 
C73 C95 C151 116.5 . . ? 
C160 C94 C199 120.1 . . ? 
C176 C93 C62 119.0 . . ? 
C39 C92 C28 124.3 . . ? 
C39 C92 C209 118.1 . . ? 
C28 C92 C209 117.5 . . ? 
C137 C91 C38 114.2 . . ? 
N46 C90 C150 122.7 . . ? 
C243 C89 C83 118.0 . . ? 
O44 C88 O25 128.6(10) . . ? 
O44 C88 C101 114.8(7) . . ? 
O25 C88 C101 116.6(7) . . ? 
C79 N21 C80 116.6 . . ? 
C82 C87 C119 121.7 . . ? 
C221 N20 C204 118.5 . . ? 
C85 N19 C65 118.5 . . ? 
C83 N18 C32 120.3 . . ? 
C86 N17 C77 117.8 . . ? 
N17 C86 C122 125.2 . . ? 
N19 C85 C238 123.1 . . ? 
O40 C84 O29 122.7(11) . . ? 
O40 C84 C228 127.4(8) . . ? 
O29 C84 C228 109.8(7) . . ? 
O40 C84 Dy26 60.5(8) . . ? 
O29 C84 Dy26 62.3(7) . . ? 
C228 C84 Dy26 172.03(2) . . ? 
N18 C83 C89 125.7 . . ? 
N22 C82 C87 125.4 . . ? 
C216 C81 C205 119.1 . . ? 
C216 C81 C177 117.3 . . ? 
C205 C81 C177 123.5 . . ? 
N21 C80 C242 121.4 . . ? 
N21 C79 C108 123.7 . . ? 
C76 N16 C63 118.6 . . ? 
C44 C78 N45 120.4 . . ? 
N17 C77 C148 122.8 . . ? 
N16 C76 C110 123.5 . . ? 
N50 C75 C116 125.8 . . ? 
C163 C74 C152 119.2 . 3_376 ? 
C95 C73 C54 114.8 . . ? 
C243 C72 C32 121.1 . . ? 
C239 C71 C34 111.5 . . ? 
C227 N15 C192 117.5 . . ? 
C50 N14 C53 126.0 . . ? 
C30 N13 C54 119.7 . . ? 
C58 N12 C223 120.5 . . ? 
C198 N11 C45 120.9 . . ? 
C212 C70 C29 118.9 . . ? 
C212 C70 C61 125.4 . . ? 
C29 C70 C61 114.7 . . ? 
C43 N10 C12 120.9 . . ? 
C25 C69 C68 121.2 . . ? 
C224 C68 C69 115.5 . . ? 
C224 C68 C56 122.4 . . ? 
C69 C68 C56 122.0 . . ? 
C27 N9 C38 118.6 . . ? 
C45 C67 C171 117.6 . . ? 
C138 C66 C196 111.7 . . ? 
C240 C65 N19 118.1 . . ? 
C51 C64 C136 117.4 . . ? 
C214 N8 C47 122.9 . . ? 
N16 C63 C96 127.0 . . ? 
N25 C62 C93 125.2 . . ? 
O32 C61 O72 124.3(10) . . ? 
O32 C61 C70 114.6(7) . . ? 
O72 C61 C70 121.0(7) . . ? 
C204 C60 C120 116.4 . . ? 
C135 C59 C14 118.8 . . ? 
N12 C58 C114 118.7 . . ? 
C102 C57 N43 118.4 . . ? 
O23 C56 O46 126.8(11) . . ? 
O23 C56 C68 118.8(8) . . ? 
O46 C56 C68 114.3(7) . . ? 
C50 C55 C168 121.6 . . ? 
N13 C54 C73 121.1 . . ? 
N14 C53 C206 112.1 . . ? 
C103 C52 C47 114.4 . . ? 
N46 C51 C64 119.2 . . ? 
C55 C50 N14 118.4 . . ? 
N26 C49 C234 124.4 . . ? 
C137 C48 C27 119.3 . . ? 
N8 C47 C52 121.3 . . ? 
N24 C46 C220 125.6 . . ? 
C67 C45 N11 122.9 . . ? 
C78 C44 C129 120.7 . . ? 
N10 C43 C33 120.8 . . ? 
C198 C42 C171 116.0 . . ? 
C11 C41 C23 127.2 . . ? 
C11 C41 C36 121.6 . . ? 
C23 C41 C36 110.8 . . ? 
N48 C40 C28 124.1 . . ? 
C17 C39 C92 113.1 . . ? 
N9 C38 C91 123.5 . . ? 
C99 C37 C12 124.4 . . ? 
O18 C36 O2 126.2(10) . . ? 
O18 C36 C41 120.2(9) . . ? 
O2 C36 C41 110.2 . . ? 
C182 N7 C6 120.7 . . ? 
O8 C35 O1 121.2(10) . . ? 
O8 C35 C215 121.4(10) . . ? 
O1 C35 C215 116.3 . . ? 
C213 N6 C179 109.4 . . ? 
C16 N5 C10 113.1 . . ? 
N50 C34 C71 125.3 . . ? 
C8 N4 C9 121.0 . . ? 
C99 C33 C43 120.4 . . ? 
C183 N3 C184 115.8 . . ? 
N18 C32 C72 112.1 . . ? 
C183 C31 C101 114.9 . . ? 
N13 C30 C218 123.0 . . ? 
C70 C29 C16 112.5 . . ? 
C40 C28 C92 113.1 . . ? 
N9 C27 C48 121.5 . . ? 
N39 C26 C104 123.4 . . ? 
N42 C25 C69 121.6 . . ? 
N44 C24 C19 123.4 . . ? 
C41 C23 C9 115.2 . . ? 
C132 C22 C185 123.8 . . ? 
C236 C21 N40 119.9 . . ? 
N44 C20 C189 130.3 . . ? 
C215 C19 C24 115.4 . . ? 
C100 C18 C213 109.3 . . ? 
N48 C17 C39 125.3 . . ? 
N5 C16 C29 122.7 . . ? 
C182 C15 C207 116.2 . . ? 
N39 C14 C59 117.8 . . ? 
C211 C13 N2 154.1 . . ? 
N10 C12 C37 112.8 . . ? 
C41 C11 C8 113.9 . . ? 
C212 C10 N5 127.3 . . ? 
N4 C9 C23 108.4 . . ? 
N4 C8 C11 125.1 . . ? 
C13 N2 C191 81.1 . . ? 
O5 C7 C4 122.9 . . ? 
O5 C7 O6 133.2 . . ? 
C4 C7 O6 103.3 . . ? 
C226 C6 N7 116.6 . . ? 
C3 C5 N1 134.8 . . ? 
C2 C4 C3 117.5 . . ? 
C2 C4 C7 117.1 . . ? 
C3 C4 C7 120.0 . . ? 
C5 C3 C4 107.2 . . ? 
C1 C2 C4 126.4 . . ? 
C5 N1 C1 109.5 . . ? 
C2 C1 N1 117.2 . . ? 
 
_diffrn_measured_fraction_theta_max    0.997 
_diffrn_reflns_theta_full              19.82 
_diffrn_measured_fraction_theta_full   0.997 
_refine_diff_density_max    1.962 
_refine_diff_density_min   -3.391 
_refine_diff_density_rms    0.209 


#========================================================================END
data_2 
 
_audit_creation_method            SHELXL-97 
_chemical_name_systematic 
; 
 ? 
; 
_chemical_name_common             ? 
_chemical_melting_point           ? 
_chemical_formula_moiety          ? 
_chemical_formula_sum 
 'C750 H933 Dy104 I4 N161 O648' 
_chemical_formula_weight          39979.18 
 
loop_ 
 _atom_type_symbol 
 _atom_type_description 
 _atom_type_scat_dispersion_real 
 _atom_type_scat_dispersion_imag 
 _atom_type_scat_source 
 'C'  'C'   0.0033   0.0016 
 'International Tables Vol C Tables 4.2.6.8 and 6.1.1.4' 
 'H'  'H'   0.0000   0.0000 
 'International Tables Vol C Tables 4.2.6.8 and 6.1.1.4' 
 'N'  'N'   0.0061   0.0033 
 'International Tables Vol C Tables 4.2.6.8 and 6.1.1.4' 
 'O'  'O'   0.0106   0.0060 
 'International Tables Vol C Tables 4.2.6.8 and 6.1.1.4' 
 'Dy'  'Dy'  -0.1892   4.4098 
 'International Tables Vol C Tables 4.2.6.8 and 6.1.1.4' 
 'I'  'I'  -0.4742   1.8119 
 'International Tables Vol C Tables 4.2.6.8 and 6.1.1.4' 
 
_symmetry_cell_setting            Triclinic
_symmetry_space_group_name_H-M    P-1 
 
loop_ 
 _symmetry_equiv_pos_as_xyz 
 'x, y, z' 
 '-x, -y, -z' 
 
_cell_length_a                    37.962(2) 
_cell_length_b                    39.630(3) 
_cell_length_c                    42.080(3) 
_cell_angle_alpha                 90.1890(10) 
_cell_angle_beta                  93.5050(10) 
_cell_angle_gamma                 109.6040(10) 
_cell_volume                      59506(6) 
_cell_formula_units_Z             2 
_cell_measurement_temperature     273(2) 
_cell_measurement_reflns_used     ? 
_cell_measurement_theta_min       ? 
_cell_measurement_theta_max       ? 
 
_exptl_crystal_description        ? 
_exptl_crystal_colour             ? 
_exptl_crystal_size_max           ? 
_exptl_crystal_size_mid           ? 
_exptl_crystal_size_min           ? 
_exptl_crystal_density_meas       ? 
_exptl_crystal_density_diffrn     2.231 
_exptl_crystal_density_method     'not measured' 
_exptl_crystal_F_000              37640 
_exptl_absorpt_coefficient_mu     6.648 
_exptl_absorpt_correction_type    ? 
_exptl_absorpt_correction_T_min   ? 
_exptl_absorpt_correction_T_max   ? 
_exptl_absorpt_process_details    ? 
 
_exptl_special_details 
; 
 ? 
; 
 
_diffrn_ambient_temperature       273(2) 
_diffrn_radiation_wavelength      0.71073 
_diffrn_radiation_type            MoK\a 
_diffrn_radiation_source          'fine-focus sealed tube' 
_diffrn_radiation_monochromator   graphite 
_diffrn_measurement_device_type   ? 
_diffrn_measurement_method        ? 
_diffrn_detector_area_resol_mean  ? 
_diffrn_standards_number          ? 
_diffrn_standards_interval_count  ? 
_diffrn_standards_interval_time   ? 
_diffrn_standards_decay_%         ? 
_diffrn_reflns_number             305921 
_diffrn_reflns_av_R_equivalents   0.0598 
_diffrn_reflns_av_sigmaI/netI     0.2272 
_diffrn_reflns_limit_h_min        -46 
_diffrn_reflns_limit_h_max        39 
_diffrn_reflns_limit_k_min        -48 
_diffrn_reflns_limit_k_max        48 
_diffrn_reflns_limit_l_min        -52 
_diffrn_reflns_limit_l_max        32 
_diffrn_reflns_theta_min          1.36 
_diffrn_reflns_theta_max          26.07 
_reflns_number_total              222596 
_reflns_number_gt                 86267 
_reflns_threshold_expression      >2sigma(I) 
 
_computing_data_collection        ? 
_computing_cell_refinement        ? 
_computing_data_reduction         ? 
_computing_structure_solution     'SHELXS-97 (Sheldrick, 1990)' 
_computing_structure_refinement   'SHELXL-97 (Sheldrick, 1997)' 
_computing_molecular_graphics     ? 
_computing_publication_material   ? 
 
_refine_special_details 
; 
 Refinement of F^2^ against ALL reflections.  The weighted R-factor wR and 
 goodness of fit S are based on F^2^, conventional R-factors R are based 
 on F, with F set to zero for negative F^2^. The threshold expression of 
 F^2^ > 2sigma(F^2^) is used only for calculating R-factors(gt) etc. and is 
 not relevant to the choice of reflections for refinement.  R-factors based 
 on F^2^ are statistically about twice as large as those based on F, and R- 
 factors based on ALL data will be even larger. 
; 
 
_refine_ls_structure_factor_coef  Fsqd  
_refine_ls_matrix_type            fullcycle 
_refine_ls_weighting_scheme       calc  
_refine_ls_weighting_details 
 'calc w=1/[\s^2^(Fo^2^)+(0.0200P)^2^+0.0000P] where P=(Fo^2^+2Fc^2^)/3' 
_atom_sites_solution_primary      direct 
_atom_sites_solution_secondary    difmap 
_atom_sites_solution_hydrogens    geom 
_refine_ls_hydrogen_treatment     mixed 
_refine_ls_extinction_method      none 
_refine_ls_extinction_coef        ? 
_refine_ls_number_reflns          222596 
_refine_ls_number_parameters      7209 
_refine_ls_number_restraints      181 
_refine_ls_R_factor_all           0.1703 
_refine_ls_R_factor_gt            0.0713 
_refine_ls_wR_factor_ref          0.1544 
_refine_ls_wR_factor_gt           0.1326 
_refine_ls_goodness_of_fit_ref    0.962 
_refine_ls_restrained_S_all       0.964 
_refine_ls_shift/su_max           0.004 
_refine_ls_shift/su_mean          0.002 
 
loop_ 
 _atom_site_label 
 _atom_site_type_symbol 
 _atom_site_fract_x 
 _atom_site_fract_y 
 _atom_site_fract_z 
 _atom_site_U_iso_or_equiv 
 _atom_site_adp_type 
 _atom_site_occupancy 
 _atom_site_symmetry_multiplicity 
 _atom_site_calc_flag 
 _atom_site_refinement_flags 
 _atom_site_disorder_assembly 
 _atom_site_disorder_group 
I1 I 0.9695 0.7083 0.3638 0.059 Uani 1 1 d . . . 
I2 I 0.5266 0.7912 0.6381 0.060 Uani 1 1 d . . . 
I3 I 0.4640 0.7113 0.1372 0.052 Uani 1 1 d . . . 
I4 I 0.9587 0.2119 0.1371 0.055 Uani 1 1 d . . . 
O2 O 0.3505 0.3424 2.2236 0.077 Uiso 1 1 d . . . 
O3 O 0.4266 0.1323 2.9550 0.090 Uiso 1 1 d . . . 
O4 O 0.6143 0.0680 2.9101 0.042 Uiso 1 1 d . . . 
O12 O 0.4333 0.3591 2.2125 0.124 Uiso 1 1 d . . . 
O13 O 0.4233 0.3912 2.2555 0.086 Uiso 1 1 d . . . 
O14 O 0.6950 0.3870 3.0410 0.102 Uiso 1 1 d . . . 
O15 O 0.3041 0.2744 2.4049 0.086 Uiso 1 1 d . . . 
O16 O 0.3424 0.2467 2.4514 0.089 Uiso 1 1 d . . . 
O17 O 0.4815 0.2414 3.0385 0.084 Uiso 1 1 d . . . 
O18 O 0.6151 0.4732 2.9060 0.065 Uiso 1 1 d . . . 
O19 O 0.7152 0.3755 2.9669 0.077 Uiso 1 1 d . . . 
O21 O 0.6949 0.4657 2.7712 0.054 Uiso 1 1 d . . . 
O22 O 0.3971 0.3288 2.4563 0.065 Uiso 1 1 d . . . 
O23 O 0.2870 0.1015 2.3048 0.078 Uiso 1 1 d . . . 
O24 O 0.5329 0.2484 2.2071 0.065 Uiso 1 1 d . . . 
O25 O 0.3810 0.2166 2.6956 0.054 Uiso 1 1 d . . . 
O26 O 0.4999 0.3721 2.5562 0.065 Uiso 1 1 d . . . 
O27 O 0.5643 0.4916 2.9006 0.076 Uiso 1 1 d . . . 
O28 O 0.7478 0.3146 2.9074 0.057 Uiso 1 1 d . . . 
O29 O 0.4997 0.2975 3.0246 0.093 Uiso 1 1 d . . . 
O30 O 0.3611 0.3431 2.2878 0.071 Uiso 1 1 d . . . 
O31 O 0.4519 0.1866 2.9933 0.072 Uiso 1 1 d . . . 
O32 O 0.4206 0.2357 2.2125 0.046 Uiso 1 1 d . . . 
O33 O 0.5295 0.0539 2.9580 0.064 Uiso 1 1 d . . . 
O34 O 0.3622 0.2816 2.2173 0.077 Uiso 1 1 d . . . 
O35 O 0.3484 0.2253 2.2350 0.064 Uiso 1 1 d . . . 
O36 O 0.4161 0.2449 2.9962 0.064 Uiso 1 1 d . . . 
O38 O 0.2949 0.1716 2.2804 0.057 Uiso 1 1 d . . . 
O39 O 0.3051 0.1153 2.2388 0.051 Uiso 1 1 d . . . 
O40 O 0.6035 0.1143 2.9512 0.055 Uiso 1 1 d . . . 
O41 O 0.5884 0.4745 2.8379 0.048 Uiso 1 1 d . . . 
O42 O 0.4647 0.4101 2.7940 0.068 Uiso 1 1 d . . . 
O43 O 0.7031 0.2139 2.4392 0.035 Uiso 1 1 d . . . 
O44 O 0.6460 0.4193 3.0761 0.065 Uiso 1 1 d . . . 
O45 O 0.2882 0.1905 2.4119 0.068 Uiso 1 1 d . . . 
O46 O 0.3956 0.4137 2.8956 0.050 Uiso 1 1 d . . . 
O47 O 0.2848 0.0545 2.4601 0.048 Uiso 1 1 d . . . 
O48 O 0.3550 0.3164 2.3350 0.046 Uiso 1 1 d . . . 
O49 O 0.5610 0.1760 2.2131 0.052 Uiso 1 1 d . . . 
O50 O 0.3424 0.0897 2.2612 0.045 Uiso 1 1 d . . . 
O51 O 0.7265 0.2952 2.8580 0.056 Uiso 1 1 d . . . 
O52 O 0.4035 0.1261 2.7790 0.034 Uiso 1 1 d . . . 
O53 O 0.3108 0.3620 2.8935 0.044 Uiso 1 1 d . . . 
O54 O 0.4389 0.2940 2.2506 0.042 Uiso 1 1 d . . . 
O55 O 0.3656 0.0408 2.3375 0.031 Uiso 1 1 d . . . 
O56 O 0.6723 0.4191 2.7118 0.061 Uiso 1 1 d . . . 
O57 O 0.3634 0.1844 2.4108 0.031 Uiso 1 1 d . . . 
O58 O 0.3934 0.1366 2.9114 0.042 Uiso 1 1 d . . . 
O59 O 0.6952 0.1846 2.3939 0.030 Uiso 1 1 d . . . 
O60 O 0.5074 0.4498 2.8542 0.051 Uiso 1 1 d . . . 
O61 O 0.3503 0.3593 2.8408 0.045 Uiso 1 1 d . . . 
O62 O 0.3795 0.1745 2.2491 0.035 Uiso 1 1 d . . . 
O63 O 0.2857 0.0061 2.4076 0.042 Uiso 1 1 d . . . 
O64 O 0.3729 0.2478 2.7641 0.050 Uiso 1 1 d . . . 
O65 O 0.5188 0.3347 2.2416 0.056 Uiso 1 1 d . . . 
O66 O 0.5164 0.3774 2.2937 0.040 Uiso 1 1 d . . . 
O67 O 0.4252 0.2896 2.7113 0.046 Uiso 1 1 d . . . 
O68 O 0.4387 0.3351 2.2994 0.045 Uiso 1 1 d . . . 
O69 O 0.6134 0.2688 2.2220 0.044 Uiso 1 1 d . . . 
O70 O 0.6234 0.3471 3.0601 0.047 Uiso 1 1 d . . . 
O71 O 0.4485 0.1961 2.2043 0.050 Uiso 1 1 d . . . 
O72 O 0.4262 0.0928 2.2498 0.036 Uiso 1 1 d . . . 
O73 O 0.6088 0.4382 3.0227 0.046 Uiso 1 1 d . . . 
O74 O 0.5238 0.4136 2.7404 0.046 Uiso 1 1 d . . . 
O75 O 0.4399 0.3904 2.7470 0.054 Uiso 1 1 d . . . 
O76 O 0.4680 0.3456 2.7130 0.063 Uiso 1 1 d . . . 
O77 O 0.5825 0.2944 3.0403 0.036 Uiso 1 1 d . . . 
O78 O 0.4863 0.3910 2.4995 0.046 Uiso 1 1 d . . . 
O79 O 0.3701 0.2346 2.3513 0.033 Uiso 1 1 d . . . 
O80 O 0.5289 0.1714 2.9961 0.037 Uiso 1 1 d . . . 
O81 O 0.5610 0.0766 2.8973 0.037 Uiso 1 1 d . . . 
O82 O 0.5028 0.2646 2.2690 0.034 Uiso 1 1 d . . . 
O83 O 0.5685 0.3194 2.2359 0.055 Uiso 1 1 d . . . 
O84 O 0.6981 0.2903 2.9541 0.042 Uiso 1 1 d . . . 
O85 O 0.3726 0.1509 2.6673 0.048 Uiso 1 1 d . . . 
O86 O 0.2918 0.2309 2.3558 0.079 Uiso 1 1 d . . . 
O87 O 0.6885 0.4222 2.9254 0.043 Uiso 1 1 d . . . 
O88 O 0.4133 0.0855 2.1821 0.046 Uiso 1 1 d . . . 
O89 O 0.5918 0.3262 2.7173 0.031 Uiso 1 1 d . . . 
O90 O 0.5398 0.1212 2.9837 0.043 Uiso 1 1 d . . . 
O91 O 0.3442 0.2357 2.9012 0.034 Uiso 1 1 d . . . 
O92 O 0.5606 0.3774 2.4443 0.043 Uiso 1 1 d . . . 
O93 O 0.6361 0.1769 2.8010 0.035 Uiso 1 1 d . . . 
O94 O 0.6936 0.2387 2.3388 0.031 Uiso 1 1 d . . . 
O95 O 0.3597 -0.0007 2.4256 0.041 Uiso 1 1 d . . . 
O96 O 0.5847 0.2172 2.2741 0.025 Uiso 1 1 d . . . 
O98 O 0.3591 0.1706 2.8175 0.058 Uiso 1 1 d . . . 
O99 O 0.4291 0.3573 2.3579 0.043 Uiso 1 1 d . . . 
O100 O 0.3585 0.0596 2.4924 0.045 Uiso 1 1 d . . . 
O101 O 0.4552 0.3118 2.8786 0.023 Uiso 1 1 d . . . 
O102 O 0.4147 0.1033 2.4995 0.028 Uiso 1 1 d . . . 
O103 O 0.2887 0.0900 2.3559 0.041 Uiso 1 1 d . . . 
O104 O 0.5795 0.3964 2.3953 0.053 Uiso 1 1 d . . . 
O105 O 0.5833 0.4250 2.7548 0.035 Uiso 1 1 d . . . 
O106 O 0.3391 0.1740 2.3474 0.029 Uiso 1 1 d . . . 
O107 O 0.5468 0.2314 2.5141 0.043 Uiso 1 1 d . . . 
O108 O 0.4245 0.3294 2.5334 0.042 Uiso 1 1 d . . . 
O109 O 0.3458 0.0689 2.3887 0.019 Uiso 1 1 d . . . 
O110 O 0.3851 0.2641 2.9557 0.039 Uiso 1 1 d . . . 
O111 O 0.6332 0.2357 2.4235 0.019 Uiso 1 1 d . . . 
O112 O 0.3220 0.2958 2.9096 0.042 Uiso 1 1 d . . . 
O113 O 0.5177 0.3247 2.3943 0.037 Uiso 1 1 d . . . 
O114 O 0.6176 0.1577 2.8487 0.043 Uiso 1 1 d . . . 
O115 O 0.6543 0.2502 2.3020 0.028 Uiso 1 1 d . . . 
O116 O 0.2895 0.1344 2.4078 0.044 Uiso 1 1 d . . . 
O117 O 0.3911 0.1257 2.2025 0.050 Uiso 1 1 d . . . 
O118 O 0.3501 0.1213 2.8463 0.036 Uiso 1 1 d . . . 
O119 O 0.6248 0.3113 2.2778 0.041 Uiso 1 1 d . . . 
O120 O 0.3980 0.0419 2.2948 0.039 Uiso 1 1 d . . . 
O121 O 0.5478 0.3541 2.7726 0.022 Uiso 1 1 d . . . 
O122 O 0.4537 0.4174 2.9152 0.042 Uiso 1 1 d . . . 
O123 O 0.6209 0.1730 2.3101 0.037 Uiso 1 1 d . . . 
O124 O 0.4879 0.0462 2.4178 0.041 Uiso 1 1 d . . . 
O125 O 0.6725 0.2468 2.7828 0.033 Uiso 1 1 d . . . 
O126 O 0.5817 0.4460 2.9762 0.037 Uiso 1 1 d . . . 
O127 O 0.3462 0.1812 2.8887 0.032 Uiso 1 1 d . . . 
O128 O 0.5017 0.3270 2.3430 0.028 Uiso 1 1 d . . . 
O129 O 0.4448 0.1388 2.6810 0.032 Uiso 1 1 d . . . 
O130 O 0.6993 0.2389 2.9009 0.038 Uiso 1 1 d . . . 
O131 O 0.4566 0.1753 2.4927 0.023 Uiso 1 1 d . . . 
O132 O 0.4428 0.2679 2.3118 0.026 Uiso 1 1 d . . . 
O133 O 0.6580 0.3100 2.7359 0.033 Uiso 1 1 d . . . 
O134 O 0.4649 0.3722 2.9636 0.036 Uiso 1 1 d . . . 
O135 O 0.5144 0.2147 2.2631 0.030 Uiso 1 1 d . . . 
O136 O 0.3758 0.1532 2.4914 0.035 Uiso 1 1 d . . . 
O137 O 0.5015 0.1008 2.2617 0.027 Uiso 1 1 d . . . 
O138 O 0.5211 0.0405 2.3451 0.049 Uiso 1 1 d . . . 
O139 O 0.4883 0.1102 2.1637 0.046 Uiso 1 1 d . . . 
O140 O 0.5703 0.3911 2.3248 0.039 Uiso 1 1 d . . . 
O141 O 0.7334 0.3807 2.8458 0.034 Uiso 1 1 d . . . 
O142 O 0.6280 0.2734 2.9981 0.043 Uiso 1 1 d . . . 
O143 O 0.4816 0.0717 2.9124 0.041 Uiso 1 1 d . . . 
O144 O 0.4542 0.2123 2.2718 0.027 Uiso 1 1 d . . . 
O145 O 0.4743 0.1825 2.7401 0.020 Uiso 1 1 d . . . 
O146 O 0.7486 0.4389 2.7397 0.042 Uiso 1 1 d . . . 
O147 O 0.3982 0.2126 2.5001 0.037 Uiso 1 1 d . . . 
O148 O 0.7449 0.4155 2.8024 0.034 Uiso 1 1 d . . . 
O149 O 0.5422 0.2056 2.8930 0.016 Uiso 1 1 d . . . 
O150 O 0.4494 0.0308 2.2383 0.034 Uiso 1 1 d . . . 
O151 O 0.3653 0.3647 2.9475 0.036 Uiso 1 1 d . . . 
O152 O 0.6959 0.4253 2.8721 0.039 Uiso 1 1 d . . . 
O153 O 0.4953 0.1151 2.5052 0.040 Uiso 1 1 d . . . 
O154 O 0.6239 0.2004 2.7348 0.040 Uiso 1 1 d . . . 
O155 O 0.5196 0.3848 2.9911 0.028 Uiso 1 1 d . . . 
O156 O 0.5268 0.0781 2.2068 0.036 Uiso 1 1 d . . . 
O157 O 0.3850 0.3486 2.8050 0.036 Uiso 1 1 d . . . 
O158 O 0.3641 0.2732 2.8073 0.026 Uiso 1 1 d . . . 
O159 O 0.4913 0.1136 2.8317 0.034 Uiso 1 1 d . . . 
O160 O 0.3891 0.1280 2.7267 0.046 Uiso 1 1 d . . . 
O161 O 0.7018 0.3635 2.7307 0.036 Uiso 1 1 d . . . 
O162 O 0.3767 0.2756 2.2874 0.037 Uiso 1 1 d . . . 
O163 O 0.4814 0.1461 2.2222 0.025 Uiso 1 1 d . . . 
O164 O 0.5381 0.2053 2.7021 0.034 Uiso 1 1 d . . . 
O165 O 0.4498 0.3597 2.4100 0.048 Uiso 1 1 d . . . 
O166 O 0.5619 0.1591 2.7646 0.035 Uiso 1 1 d . . . 
O167 O 0.4643 0.2905 2.9437 0.018 Uiso 1 1 d . . . 
O168 O 0.4474 0.0996 2.8846 0.039 Uiso 1 1 d . . . 
O169 O 0.4700 0.2350 2.5352 0.032 Uiso 1 1 d . . . 
O170 O 0.4898 0.3383 2.4584 0.026 Uiso 1 1 d . . . 
O171 O 0.6370 0.3047 2.9277 0.017 Uiso 1 1 d . . . 
O172 O 0.5511 0.3538 2.5208 0.042 Uiso 1 1 d . . . 
O173 O 0.3661 0.1201 2.3343 0.021 Uiso 1 1 d . . . 
O174 O 0.5759 0.3575 3.0028 0.022 Uiso 1 1 d . . . 
O175 O 0.6057 0.1301 2.4181 0.022 Uiso 1 1 d . . . 
O176 O 0.7066 0.2979 2.4137 0.034 Uiso 1 1 d . . . 
O177 O 0.4349 0.2110 2.8290 0.022 Uiso 1 1 d . . . 
O178 O 0.5359 0.2439 2.9909 0.027 Uiso 1 1 d . . . 
O179 O 0.5214 0.2966 2.9633 0.020 Uiso 1 1 d . . . 
O180 O 0.5811 0.1416 2.2710 0.027 Uiso 1 1 d . . . 
O181 O 0.6328 0.4049 2.9677 0.025 Uiso 1 1 d . . . 
O182 O 0.4292 0.2201 2.9198 0.026 Uiso 1 1 d . . . 
O183 O 0.6503 0.1903 2.9065 0.040 Uiso 1 1 d . . . 
O184 O 0.4120 0.3300 2.9225 0.023 Uiso 1 1 d . . . 
O185 O 0.4748 0.1421 2.4444 0.021 Uiso 1 1 d . . . 
O186 O 0.5121 0.1134 2.3300 0.024 Uiso 1 1 d . . . 
O187 O 0.4846 0.3514 2.8195 0.029 Uiso 1 1 d . . . 
O188 O 0.5660 0.0777 2.3988 0.028 Uiso 1 1 d . . . 
O189 O 0.4276 0.3676 2.8660 0.021 Uiso 1 1 d . . . 
O190 O 0.6414 0.3445 2.9911 0.025 Uiso 1 1 d . . . 
O191 O 0.6065 0.3455 2.8175 0.021 Uiso 1 1 d . . . 
O192 O 0.5797 0.1725 2.9314 0.021 Uiso 1 1 d . . . 
O193 O 0.6500 0.3045 2.8528 0.015 Uiso 1 1 d . . . 
O194 O 0.3786 0.2986 2.8699 0.024 Uiso 1 1 d . . . 
O195 O 0.4869 0.2201 2.9388 0.020 Uiso 1 1 d . . . 
O196 O 0.5031 0.1490 2.9278 0.020 Uiso 1 1 d . . . 
O197 O 0.5697 0.2590 2.3140 0.027 Uiso 1 1 d . . . 
O198 O 0.3478 0.1106 2.4392 0.025 Uiso 1 1 d . . . 
O199 O 0.4824 0.1335 2.7842 0.028 Uiso 1 1 d . . . 
O200 O 0.4729 0.2885 2.5547 0.027 Uiso 1 1 d . . . 
O201 O 0.4008 0.0194 2.3890 0.036 Uiso 1 1 d . . . 
O202 O 0.4664 0.0308 2.2913 0.028 Uiso 1 1 d . . . 
O203 O 0.5713 0.1638 2.5005 0.027 Uiso 1 1 d . . . 
O204 O 0.3709 0.2025 2.3071 0.032 Uiso 1 1 d . . . 
O205 O 0.5886 0.3284 2.4115 0.022 Uiso 1 1 d . . . 
O206 O 0.6209 0.2468 2.9121 0.021 Uiso 1 1 d . . . 
O207 O 0.4009 0.1412 2.2945 0.031 Uiso 1 1 d . . . 
O208 O 0.4323 0.3198 2.7752 0.024 Uiso 1 1 d . . . 
O209 O 0.5372 0.3978 2.8197 0.025 Uiso 1 1 d . . . 
O210 O 0.6269 0.4613 2.8062 0.031 Uiso 1 1 d . . . 
O211 O 0.6387 0.2460 2.8509 0.021 Uiso 1 1 d . . . 
O212 O 0.3998 0.2413 2.4221 0.038 Uiso 1 1 d . . . 
O213 O 0.5383 0.2815 2.7016 0.029 Uiso 1 1 d . . . 
O214 O 0.5539 0.3083 2.3127 0.028 Uiso 1 1 d . . . 
O215 O 0.5815 0.2654 2.9396 0.019 Uiso 1 1 d . . . 
O216 O 0.5864 0.3964 2.9040 0.020 Uiso 1 1 d . . . 
O217 O 0.4088 0.2400 2.8606 0.020 Uiso 1 1 d . . . 
O218 O 0.3122 -0.0079 2.4745 0.033 Uiso 1 1 d . . . 
O219 O 0.5431 0.2149 2.7863 0.023 Uiso 1 1 d . . . 
O220 O 0.5047 0.2194 2.4575 0.021 Uiso 1 1 d . . . 
O221 O 0.5452 0.1385 2.8787 0.020 Uiso 1 1 d . . . 
O222 O 0.6198 0.2875 2.4616 0.026 Uiso 1 1 d . . . 
O223 O 0.5253 0.1330 2.4260 0.013 Uiso 1 1 d . . . 
O224 O 0.4374 0.2679 2.8169 0.018 Uiso 1 1 d . . . 
O225 O 0.5290 0.4146 2.9229 0.023 Uiso 1 1 d . . . 
O226 O 0.4134 0.1995 2.7573 0.023 Uiso 1 1 d . . . 
O227 O 0.4959 0.3086 2.7615 0.024 Uiso 1 1 d . . . 
O228 O 0.5120 0.3810 2.8647 0.026 Uiso 1 1 d . . . 
O229 O 0.5523 0.1436 2.3677 0.020 Uiso 1 1 d . . . 
O230 O 0.6287 0.3780 2.7598 0.020 Uiso 1 1 d . . . 
O231 O 0.5698 0.1986 2.8297 0.022 Uiso 1 1 d . . . 
O232 O 0.6208 0.2720 2.8082 0.017 Uiso 1 1 d . . . 
O233 O 0.4539 0.0612 2.3507 0.014 Uiso 1 1 d . . . 
O234 O 0.5244 0.1852 2.5455 0.032 Uiso 1 1 d . . . 
O235 O 0.6297 0.3603 2.3497 0.033 Uiso 1 1 d . . . 
O236 O 0.5464 0.1705 2.3207 0.011 Uiso 1 1 d . . . 
O237 O 0.5540 0.2065 2.4442 0.017 Uiso 1 1 d . . . 
O238 O 0.4563 0.2993 2.3757 0.025 Uiso 1 1 d . . . 
O239 O 0.5994 0.2160 2.9824 0.025 Uiso 1 1 d . . . 
O240 O 0.6750 0.3501 2.7948 0.020 Uiso 1 1 d . . . 
O241 O 0.5912 0.2567 2.7488 0.024 Uiso 1 1 d . . . 
O242 O 0.4354 0.1484 2.8411 0.020 Uiso 1 1 d . . . 
O243 O 0.4020 0.0774 2.4342 0.022 Uiso 1 1 d . . . 
O244 O 0.7484 0.2586 2.3896 0.025 Uiso 1 1 d . . . 
O245 O 0.4222 0.1117 2.3328 0.023 Uiso 1 1 d . . . 
O246 O 0.4049 0.1351 2.3973 0.026 Uiso 1 1 d . . . 
O247 O 0.4713 0.1116 2.3977 0.018 Uiso 1 1 d . . . 
O248 O 0.3815 0.2914 2.3902 0.037 Uiso 1 1 d . . . 
O249 O 0.4656 0.2413 2.7173 0.020 Uiso 1 1 d . . . 
O250 O 0.4356 0.2841 2.4837 0.017 Uiso 1 1 d . . . 
Dy1A Dy -0.0679 0.8014 2.4316 0.022 Uani 1 1 d . . . 
Dy1 Dy 0.3958 0.3253 2.2542 0.051 Uani 1 1 d . . . 
Dy2A Dy 0.1806 0.7414 2.3863 0.023 Uani 1 1 d . . . 
Dy2 Dy 0.3386 0.2343 2.3986 0.035 Uani 1 1 d . . . 
Dy3A Dy -0.1064 0.7320 2.2717 0.025 Uani 1 1 d . . . 
Dy3 Dy 0.5168 0.1734 2.4872 0.022 Uani 1 1 d . . . 
Dy4A Dy 0.0225 0.6624 2.2623 0.024 Uani 1 1 d . . . 
Dy4 Dy 0.6374 0.3933 3.0228 0.036 Uani 1 1 d . . . 
Dy5A Dy -0.0790 0.6505 2.2496 0.024 Uani 1 1 d . . . 
Dy5 Dy 0.6931 0.4051 2.7657 0.025 Uani 1 1 d . . . 
Dy6 Dy 0.3369 0.0459 2.4400 0.030 Uani 1 1 d . . . 
Dy7 Dy 0.4344 0.3019 2.4289 0.028 Uani 1 1 d . . . 
Dy8 Dy 0.4045 0.2363 2.2667 0.039 Uani 1 1 d . . . 
Dy9 Dy 0.4888 0.3150 2.2885 0.037 Uani 1 1 d . . . 
Dy10 Dy 0.5610 0.4363 2.8756 0.028 Uani 1 1 d . . . 
Dy11 Dy 0.4832 0.3295 2.5131 0.027 Uani 1 1 d . . . 
Dy12 Dy 0.5357 0.3131 2.4443 0.022 Uani 1 1 d . . . 
Dy13 Dy 0.4057 0.2959 2.3381 0.035 Uani 1 1 d . . . 
Dy14 Dy 0.4873 0.3659 2.7657 0.023 Uani 1 1 d . . . 
Dy15 Dy 0.3416 0.1278 2.3852 0.030 Uani 1 1 d . . . 
Dy16 Dy 0.3390 0.1423 2.2883 0.039 Uani 1 1 d . . . 
Dy17 Dy 0.4116 0.1360 2.4537 0.023 Uani 1 1 d . . . 
Dy18 Dy 0.6536 0.3657 2.9380 0.023 Uani 1 1 d . . . 
Dy19 Dy 0.3983 0.1749 2.8681 0.023 Uani 1 1 d . . . 
Dy20 Dy 0.6159 0.3167 2.7709 0.020 Uani 1 1 d . . . 
Dy21 Dy 0.6048 0.2770 2.4039 0.019 Uani 1 1 d . . . 
Dy22 Dy 0.4588 0.2358 2.4798 0.022 Uani 1 1 d . . . 
Dy23 Dy 0.4748 0.2484 2.9844 0.024 Uani 1 1 d . . . 
Dy24 Dy 0.6070 0.2160 2.7822 0.021 Uani 1 1 d . . . 
Dy25 Dy 0.4668 0.0851 2.2112 0.028 Uani 1 1 d . . . 
Dy26 Dy 0.5958 0.1939 2.8807 0.022 Uani 1 1 d . . . 
Dy27 Dy 0.4385 0.2632 2.7601 0.021 Uani 1 1 d . . . 
Dy28 Dy 0.5697 0.3490 2.3621 0.028 Uani 1 1 d . . . 
Dy29 Dy 0.5115 0.0838 2.3797 0.020 Uani 1 1 d . . . 
Dy30 Dy 0.4234 0.1817 2.7047 0.023 Uani 1 1 d . . . 
Dy31 Dy 0.4307 0.1534 2.2467 0.030 Uani 1 1 d . . . 
Dy32 Dy 0.5424 0.2049 2.9493 0.022 Uani 1 1 d . . . 
Dy33 Dy 0.6679 0.3667 2.8469 0.022 Uani 1 1 d . . . 
Dy34 Dy 0.5311 0.1631 2.2631 0.025 Uani 1 1 d . . . 
Dy35 Dy 0.3693 0.3494 2.8927 0.027 Uani 1 1 d . . . 
Dy36 Dy 0.5232 0.2400 2.7421 0.020 Uani 1 1 d . . . 
Dy37 Dy 0.4916 0.1555 2.8730 0.021 Uani 1 1 d . . . 
Dy38 Dy 0.5989 0.3981 2.8000 0.020 Uani 1 1 d . . . 
Dy39 Dy 0.4215 0.3182 2.8306 0.021 Uani 1 1 d . . . 
Dy40 Dy 0.6019 0.2191 2.3307 0.021 Uani 1 1 d . . . 
Dy41 Dy 0.4081 0.0790 2.3792 0.023 Uani 1 1 d . . . 
Dy42 Dy 0.6827 0.2406 2.3912 0.022 Uani 1 1 d . . . 
Dy43 Dy 0.5855 0.1793 2.4123 0.017 Uani 1 1 d . . . 
Dy44 Dy 0.5408 0.1113 2.9293 0.029 Uani 1 1 d . . . 
Dy45 Dy 0.4562 0.0867 2.2989 0.023 Uani 1 1 d . . . 
Dy46 Dy 0.4528 0.1782 2.7919 0.020 Uani 1 1 d . . . 
Dy47 Dy 0.5666 0.3871 2.9556 0.022 Uani 1 1 d . . . 
Dy48 Dy 0.4716 0.3682 2.9077 0.022 Uani 1 1 d . . . 
Dy49 Dy 0.5809 0.3022 2.9856 0.022 Uani 1 1 d . . . 
Dy50 Dy 0.4104 0.2723 2.9076 0.022 Uani 1 1 d . . . 
Dy51 Dy 0.6814 0.2891 2.8977 0.025 Uani 1 1 d . . . 
Dy52 Dy 0.5665 0.2678 2.2591 0.032 Uani 1 1 d . . . 
Dy53 Dy 0.1275 0.1570 2.1030 0.051 Uani 1 1 d . . . 
Dy54 Dy -0.1509 0.1037 1.9809 0.062 Uani 1 1 d . . . 
Dy55 Dy -0.0588 0.3849 2.0710 0.044 Uani 1 1 d . . . 
Dy56 Dy 0.0755 0.1850 2.1659 0.029 Uani 1 1 d . . . 
Dy57 Dy 0.0137 0.1376 2.2337 0.030 Uani 1 1 d . . . 
Dy58 Dy -0.0655 0.0642 2.1239 0.029 Uani 1 1 d . . . 
Dy59 Dy 0.0946 0.3293 2.1286 0.034 Uani 1 1 d . . . 
Dy60 Dy -0.0929 0.1962 2.0159 0.036 Uani 1 1 d . . . 
Dy61 Dy 0.0226 0.1333 2.0903 0.032 Uani 1 1 d . . . 
Dy63 Dy -0.0246 0.2624 2.2578 0.022 Uani 1 1 d . . . 
Dy64 Dy -0.1914 0.0947 2.2398 0.024 Uani 1 1 d . . . 
Dy65 Dy -0.1104 0.2842 2.2204 0.024 Uani 1 1 d . . . 
Dy66 Dy 0.0133 0.2525 2.0154 0.039 Uani 1 1 d . . . 
Dy67 Dy 0.0603 0.2414 2.2369 0.027 Uani 1 1 d . . . 
Dy68 Dy -0.0018 0.3451 2.1256 0.028 Uani 1 1 d . . . 
Dy69 Dy 0.0743 0.3222 2.2928 0.031 Uani 1 1 d . . . 
Dy70 Dy -0.0557 0.2935 2.0517 0.032 Uani 1 1 d . . . 
Dy71 Dy 0.0423 0.3246 2.2060 0.026 Uani 1 1 d . . . 
Dy72 Dy 0.0807 0.2299 2.0879 0.037 Uani 1 1 d . . . 
Dy73 Dy -0.1925 0.2075 2.1086 0.034 Uani 1 1 d . . . 
Dy74 Dy -0.0755 0.1128 2.0453 0.031 Uani 1 1 d . . . 
Dy75 Dy -0.1063 0.3038 2.1223 0.028 Uani 1 1 d . . . 
Dy76 Dy -0.1708 0.1332 2.1582 0.023 Uani 1 1 d . . . 
Dy77 Dy -0.1166 0.1839 2.2325 0.020 Uani 1 1 d . . . 
Dy78 Dy -0.0989 0.1032 2.2021 0.020 Uani 1 1 d . . . 
Dy79 Dy 0.0089 0.5841 2.3802 0.022 Uani 1 1 d . . . 
Dy80 Dy -0.1618 0.5462 2.4475 0.027 Uani 1 1 d . . . 
Dy81 Dy -0.0868 0.6366 2.4587 0.021 Uani 1 1 d . . . 
Dy82 Dy -0.1014 0.7947 2.3416 0.025 Uani 1 1 d . . . 
Dy83 Dy -0.1160 0.8199 2.2555 0.036 Uani 1 1 d . . . 
Dy84 Dy -0.1638 0.7315 2.4034 0.026 Uani 1 1 d . . . 
Dy85 Dy 0.0640 0.8476 2.3614 0.025 Uani 1 1 d . . . 
Dy86 Dy -0.0424 0.5825 2.2132 0.028 Uani 1 1 d . . . 
Dy87 Dy 0.0194 0.6754 2.4886 0.020 Uani 1 1 d . . . 
Dy88 Dy -0.0940 0.5791 2.3839 0.023 Uani 1 1 d . . . 
Dy89 Dy 0.0568 0.7679 2.2596 0.030 Uani 1 1 d . . . 
Dy90 Dy -0.0498 0.5860 2.3013 0.023 Uani 1 1 d . . . 
Dy91 Dy -0.1686 0.6366 2.2950 0.026 Uani 1 1 d . . . 
Dy92 Dy 0.0843 0.6797 2.4100 0.019 Uani 1 1 d . . . 
Dy93 Dy -0.1601 0.6276 2.3931 0.024 Uani 1 1 d . . . 
Dy94 Dy 0.0337 0.8131 2.4444 0.020 Uani 1 1 d . . . 
Dy95 Dy -0.0400 0.7367 2.4831 0.020 Uani 1 1 d . . . 
Dy96 Dy -0.0215 0.8124 2.2898 0.026 Uani 1 1 d . . . 
Dy97 Dy 0.0973 0.7185 2.3277 0.021 Uani 1 1 d . . . 
Dy98 Dy 0.10215(3) 0.77697(3) 2.40188(2) 0.0203(2) Uani 1 1 d . . . 
Dy99 Dy -0.01782(3) 0.83025(3) 2.51506(2) 0.0237(3) Uani 1 1 d . . . 
O251 O 0.4833 0.2393 2.7814 0.021 Uiso 1 1 d . . . 
O252 O 0.6291 0.1940 2.3728 0.014 Uiso 1 1 d . . . 
O253 O 0.5128 0.3402 2.9322 0.023 Uiso 1 1 d . . . 
O254 O 0.6642 0.4121 2.8128 0.023 Uiso 1 1 d . . . 
O255 O 0.6272 0.3714 2.8862 0.018 Uiso 1 1 d . . . 
O256 O 0.6908 0.3515 2.8990 0.021 Uiso 1 1 d . . . 
O257 O 0.5712 0.2197 2.3783 0.019 Uiso 1 1 d . . . 
O258 O 0.5694 0.2899 2.3589 0.024 Uiso 1 1 d . . . 
O259 O 0.5110 0.2875 2.4926 0.017 Uiso 1 1 d . . . 
O260 O 0.4599 0.1917 2.8923 0.025 Uiso 1 1 d . . . 
O261 O 0.5496 0.2974 2.7712 0.020 Uiso 1 1 d . . . 
O262 O 0.5888 0.3407 2.9424 0.017 Uiso 1 1 d . . . 
O263 O 0.4203 0.1957 2.4392 0.022 Uiso 1 1 d . . . 
O264 O 0.6407 0.2672 2.3637 0.023 Uiso 1 1 d . . . 
O265 O 0.4768 0.2705 2.4334 0.018 Uiso 1 1 d . . . 
O266 O 0.4752 0.1478 2.2869 0.018 Uiso 1 1 d . . . 
O267 O 0.6629 0.3243 2.4117 0.027 Uiso 1 1 d . . . 
O268 O 0.6138 0.1816 2.4653 0.024 Uiso 1 1 d . . . 
O269 O 0.5483 0.2598 2.4293 0.016 Uiso 1 1 d . . . 
O270 O 0.5078 0.1933 2.8275 0.018 Uiso 1 1 d . . . 
O271 O 0.6023 0.4068 2.8557 0.020 Uiso 1 1 d . . . 
O273 O 0.1094 0.0923 2.1112 0.196 Uiso 1 1 d . . . 
O274 O -0.1529 0.0792 1.9301 0.196 Uiso 1 1 d . . . 
O276 O -0.1321 0.4266 2.0958 0.052 Uiso 1 1 d . . . 
O284 O 0.1622 0.8317 2.3279 0.112 Uiso 1 1 d . . . 
O285 O 0.1418 0.3260 2.0983 0.122 Uiso 1 1 d . . . 
O286 O 0.1871 0.1472 2.1008 0.123 Uiso 1 1 d . . . 
O287 O -0.1408 0.1490 1.9445 0.181 Uiso 1 1 d . . . 
O288 O 0.1367 0.3303 2.1731 0.118 Uiso 1 1 d . . . 
O289 O -0.0040 0.2049 1.9735 0.129 Uiso 1 1 d . . . 
O290 O -0.0924 0.2035 1.9627 0.101 Uiso 1 1 d . . . 
O291 O 0.1512 0.1549 2.1537 0.107 Uiso 1 1 d . . . 
O292 O -0.1977 0.0441 1.9888 0.103 Uiso 1 1 d . . . 
O293 O 0.0694 0.2562 2.0025 0.125 Uiso 1 1 d . . . 
O294 O 0.0417 0.3157 2.0068 0.075 Uiso 1 1 d . . . 
O295 O 0.0070 0.2647 1.9603 0.134 Uiso 1 1 d . . . 
O296 O 0.1017 0.7715 2.2205 0.099 Uiso 1 1 d . . . 
O297 O 0.1294 0.1369 2.0485 0.102 Uiso 1 1 d . . . 
O298 O -0.2642 0.1807 2.1093 0.074 Uiso 1 1 d . . . 
O299 O 0.1406 0.3855 2.1458 0.084 Uiso 1 1 d . . . 
O300 O 0.1707 0.2090 2.0831 0.100 Uiso 1 1 d . . . 
O301 O 0.0970 0.3703 2.0847 0.093 Uiso 1 1 d . . . 
O302 O 0.0631 0.1142 2.2515 0.099 Uiso 1 1 d . . . 
O303 O 0.1044 0.2357 2.0373 0.056 Uiso 1 1 d . . . 
O304 O -0.0959 0.8221 2.1999 0.107 Uiso 1 1 d . . . 
O305 O 0.1433 0.2701 2.0906 0.081 Uiso 1 1 d . . . 
O306 O -0.1191 0.0632 1.9769 0.090 Uiso 1 1 d . . . 
O307 O -0.0032 0.4230 2.0888 0.070 Uiso 1 1 d . . . 
O308 O -0.2133 0.5547 2.4692 0.046 Uiso 1 1 d . . . 
O309 O -0.1624 0.7438 2.4563 0.086 Uiso 1 1 d . . . 
O311 O -0.2171 0.6860 2.4097 0.057 Uiso 1 1 d . . . 
O312 O 0.0454 0.6751 2.2094 0.062 Uiso 1 1 d . . . 
O313 O -0.2153 0.6618 2.2946 0.064 Uiso 1 1 d . . . 
O314 O 0.0322 0.0895 2.2071 0.112 Uiso 1 1 d . . . 
O315 O -0.0556 0.4420 2.0430 0.098 Uiso 1 1 d . . . 
O316 O -0.1225 0.0321 2.0940 0.071 Uiso 1 1 d . . . 
O317 O -0.1236 0.3796 2.0521 0.057 Uiso 1 1 d . . . 
O318 O -0.2161 0.2000 2.0546 0.060 Uiso 1 1 d . . . 
O319 O 0.0256 0.1270 2.0337 0.054 Uiso 1 1 d . . . 
O320 O -0.0894 0.0554 2.0251 0.062 Uiso 1 1 d . . . 
O321 O -0.1362 0.2264 2.0021 0.052 Uiso 1 1 d . . . 
O322 O 0.1224 0.8576 2.3469 0.064 Uiso 1 1 d . . . 
O323 O -0.2120 0.2557 2.1020 0.055 Uiso 1 1 d . . . 
O324 O -0.0125 0.5467 2.4186 0.053 Uiso 1 1 d . . . 
O325 O -0.2037 0.7689 2.4064 0.066 Uiso 1 1 d . . . 
O326 O -0.2201 0.5889 2.3110 0.054 Uiso 1 1 d . . . 
O327 O -0.0761 0.4215 2.1077 0.066 Uiso 1 1 d . . . 
O328 O 0.1217 0.3549 2.3324 0.065 Uiso 1 1 d . . . 
O329 O 0.1215 0.2952 2.2988 0.067 Uiso 1 1 d . . . 
O330 O 0.1058 0.3776 2.2706 0.045 Uiso 1 1 d . . . 
O331 O -0.1652 0.6748 2.3574 0.035 Uiso 1 1 d . . . 
O332 O -0.1868 0.0365 2.2347 0.036 Uiso 1 1 d . . . 
O333 O 0.1346 0.2304 2.1878 0.048 Uiso 1 1 d . . . 
O334 O -0.0766 0.0067 2.0949 0.050 Uiso 1 1 d . . . 
O335 O 0.1251 0.2586 2.2328 0.052 Uiso 1 1 d . . . 
O336 O -0.0148 0.0461 2.1433 0.058 Uiso 1 1 d . . . 
O337 O 0.0593 0.8225 2.2389 0.062 Uiso 1 1 d . . . 
O338 O -0.0306 0.1170 2.0099 0.051 Uiso 1 1 d . . . 
O339 O -0.1045 0.8294 2.4596 0.054 Uiso 1 1 d . . . 
O340 O 0.0840 0.2648 2.1345 0.030 Uiso 1 1 d . . . 
O341 O -0.1982 0.0749 2.1339 0.040 Uiso 1 1 d . . . 
O342 O -0.1955 0.0746 2.0816 0.036 Uiso 1 1 d . . . 
O343 O -0.0794 0.8774 2.2488 0.053 Uiso 1 1 d . . . 
O344 O 0.1151 0.8090 2.2781 0.060 Uiso 1 1 d . . . 
O345 O 0.1118 0.1530 2.1907 0.046 Uiso 1 1 d . . . 
O346 O -0.1487 0.1942 2.0771 0.032 Uiso 1 1 d . . . 
O347 O -0.0221 0.0939 2.2638 0.049 Uiso 1 1 d . . . 
O348 O -0.2310 0.2051 2.1520 0.047 Uiso 1 1 d . . . 
O349 O -0.2143 0.5079 2.4152 0.049 Uiso 1 1 d . . . 
O350 O 0.1060 0.6315 2.4158 0.027 Uiso 1 1 d . . . 
O351 O -0.0563 0.3728 2.0172 0.047 Uiso 1 1 d . . . 
O352 O 0.0505 0.8564 2.5221 0.045 Uiso 1 1 d . . . 
O353 O -0.0209 0.6056 2.1655 0.047 Uiso 1 1 d . . . 
O354 O 0.0046 0.1949 2.2361 0.035 Uiso 1 1 d . . . 
O355 O 0.0589 0.2803 2.0755 0.036 Uiso 1 1 d . . . 
O356 O -0.2434 0.0822 2.2053 0.040 Uiso 1 1 d . . . 
O357 O 0.0215 0.7519 2.2086 0.053 Uiso 1 1 d . . . 
O358 O -0.1472 0.8423 2.2926 0.053 Uiso 1 1 d . . . 
O359 O 0.0402 0.0811 2.0839 0.064 Uiso 1 1 d . . . 
O360 O 0.0780 0.2176 2.2844 0.069 Uiso 1 1 d . . . 
O361 O -0.0157 0.1181 2.1336 0.037 Uiso 1 1 d . . . 
O362 O -0.1542 0.1525 2.0134 0.038 Uiso 1 1 d . . . 
O363 O 0.0351 0.1594 2.2842 0.058 Uiso 1 1 d . . . 
O364 O -0.0643 0.6932 2.2062 0.042 Uiso 1 1 d . . . 
O365 O -0.0002 0.2802 2.0605 0.050 Uiso 1 1 d . . . 
O366 O -0.1633 0.3060 2.0990 0.039 Uiso 1 1 d . . . 
O367 O -0.0946 0.3235 2.0701 0.040 Uiso 1 1 d . . . 
O368 O -0.0785 0.8292 2.5339 0.047 Uiso 1 1 d . . . 
O369 O -0.2112 0.5947 2.3617 0.052 Uiso 1 1 d . . . 
O370 O -0.0955 0.7300 2.2179 0.036 Uiso 1 1 d . . . 
O371 O 0.0691 0.8954 2.3934 0.059 Uiso 1 1 d . . . 
O372 O -0.1512 0.8167 2.3393 0.046 Uiso 1 1 d . . . 
O373 O -0.0390 0.2968 2.2983 0.032 Uiso 1 1 d . . . 
O374 O 0.0748 0.6442 2.2640 0.033 Uiso 1 1 d . . . 
O375 O 0.1154 0.2074 2.1247 0.036 Uiso 1 1 d . . . 
O376 O 0.0424 0.4011 2.1098 0.039 Uiso 1 1 d . . . 
O377 O -0.2079 0.7344 2.3593 0.052 Uiso 1 1 d . . . 
O378 O -0.1856 0.4930 2.4809 0.031 Uiso 1 1 d . . . 
O379 O 0.0257 0.6336 2.4250 0.022 Uiso 1 1 d . . . 
O380 O -0.1370 0.6960 2.3129 0.027 Uiso 1 1 d . . . 
O381 O 0.0829 0.3055 2.2405 0.030 Uiso 1 1 d . . . 
O382 O 0.1250 0.6935 2.3684 0.019 Uiso 1 1 d . . . 
O383 O -0.1561 0.1949 2.1503 0.027 Uiso 1 1 d . . . 
O384 O 0.0522 0.7330 2.5149 0.044 Uiso 1 1 d . . . 
O385 O -0.1586 0.7719 2.2235 0.047 Uiso 1 1 d . . . 
O386 O 0.0033 0.8312 2.2426 0.054 Uiso 1 1 d . . . 
O387 O -0.2128 0.6315 2.4182 0.039 Uiso 1 1 d . . . 
O388 O -0.1430 0.0934 2.0366 0.036 Uiso 1 1 d . . . 
O389 O -0.0945 0.2334 2.0624 0.027 Uiso 1 1 d . . . 
O390 O -0.1105 0.2826 2.0166 0.035 Uiso 1 1 d . . . 
O391 O -0.0746 0.8559 2.3617 0.034 Uiso 1 1 d . . . 
O392 O -0.1662 0.7179 2.2437 0.042 Uiso 1 1 d . . . 
O393 O 0.0096 0.8742 2.2940 0.041 Uiso 1 1 d . . . 
O394 O -0.1684 0.0865 2.2949 0.034 Uiso 1 1 d . . . 
O395 O -0.1197 0.6233 2.2051 0.037 Uiso 1 1 d . . . 
O396 O 0.0704 0.1368 2.1304 0.028 Uiso 1 1 d . . . 
O397 O -0.0909 0.1056 2.0984 0.030 Uiso 1 1 d . . . 
O398 O -0.1594 0.8400 2.2250 0.038 Uiso 1 1 d . . . 
O399 O -0.0469 0.2854 2.2136 0.020 Uiso 1 1 d . . . 
O400 O -0.1266 0.3426 2.1539 0.041 Uiso 1 1 d . . . 
O401 O -0.1057 0.6387 2.2996 0.021 Uiso 1 1 d . . . 
O402 O 0.0672 0.1846 2.2217 0.024 Uiso 1 1 d . . . 
O403 O -0.1009 0.5199 2.3928 0.038 Uiso 1 1 d . . . 
O404 O -0.0375 0.2213 2.2970 0.030 Uiso 1 1 d . . . 
O405 O 0.0638 0.8878 2.3216 0.033 Uiso 1 1 d . . . 
O406 O -0.1756 0.1488 2.2105 0.028 Uiso 1 1 d . . . 
O407 O -0.0331 0.2005 2.0346 0.035 Uiso 1 1 d . . . 
O408 O 0.0175 0.5407 2.3447 0.053 Uiso 1 1 d . . . 
O409 O -0.1350 0.2485 2.0917 0.036 Uiso 1 1 d . . . 
O410 O -0.1208 0.6543 2.4983 0.030 Uiso 1 1 d . . . 
O411 O -0.0930 0.0254 2.1625 0.039 Uiso 1 1 d . . . 
O412 O 0.0325 0.3112 2.1051 0.035 Uiso 1 1 d . . . 
O413 O -0.0661 0.7652 2.3141 0.016 Uiso 1 1 d . . . 
O414 O 0.0566 0.3552 2.1566 0.029 Uiso 1 1 d . . . 
O415 O -0.1268 0.0397 2.1979 0.028 Uiso 1 1 d . . . 
O416 O -0.2446 0.0547 2.2648 0.029 Uiso 1 1 d . . . 
O417 O -0.2354 0.1180 2.1622 0.032 Uiso 1 1 d . . . 
O418 O -0.1649 0.5855 2.2660 0.036 Uiso 1 1 d . . . 
O419 O -0.0487 0.2552 2.0103 0.029 Uiso 1 1 d . . . 
O420 O -0.1374 0.5427 2.3427 0.036 Uiso 1 1 d . . . 
O421 O -0.0171 0.8903 2.4989 0.039 Uiso 1 1 d . . . 
O422 O -0.1384 0.5592 2.4997 0.033 Uiso 1 1 d . . . 
O423 O -0.0182 0.3492 2.0706 0.033 Uiso 1 1 d . . . 
O424 O -0.2040 0.6112 2.2445 0.037 Uiso 1 1 d . . . 
O425 O 0.0888 0.3783 2.2187 0.043 Uiso 1 1 d . . . 
O426 O -0.0985 0.7136 2.5052 0.034 Uiso 1 1 d . . . 
O427 O -0.1752 0.2524 2.2216 0.028 Uiso 1 1 d . . . 
O428 O 0.0103 0.3681 2.2142 0.037 Uiso 1 1 d . . . 
O429 O -0.0648 0.7837 2.4866 0.021 Uiso 1 1 d . . . 
O430 O 0.0633 0.7572 2.3140 0.022 Uiso 1 1 d . . . 
O431 O 0.1941 0.6864 2.3890 0.026 Uiso 1 1 d . . . 
O432 O -0.1402 0.3234 2.2027 0.041 Uiso 1 1 d . . . 
O433 O -0.1975 0.1463 2.1085 0.024 Uiso 1 1 d . . . 
O434 O 0.0259 0.2100 2.0531 0.038 Uiso 1 1 d . . . 
O435 O -0.0312 0.6109 2.4007 0.021 Uiso 1 1 d . . . 
O436 O 0.2481 0.7601 2.3846 0.029 Uiso 1 1 d . . . 
O437 O -0.1258 0.3002 2.2692 0.040 Uiso 1 1 d . . . 
O438 O -0.1380 0.6842 2.4200 0.031 Uiso 1 1 d . . . 
O439 O -0.0300 0.6437 2.2229 0.030 Uiso 1 1 d . . . 
O440 O 0.0140 0.2636 2.2173 0.020 Uiso 1 1 d . . . 
O441 O -0.0547 0.8586 2.4123 0.033 Uiso 1 1 d . . . 
O442 O -0.1442 0.2535 2.1538 0.025 Uiso 1 1 d . . . 
O443 O -0.0037 0.6181 2.5082 0.038 Uiso 1 1 d . . . 
O444 O 0.0170 0.5752 2.2072 0.036 Uiso 1 1 d . . . 
O445 O 0.0643 0.7899 2.3600 0.026 Uiso 1 1 d . . . 
O446 O -0.0653 0.3399 2.2367 0.038 Uiso 1 1 d . . . 
O447 O -0.0968 0.5842 2.1843 0.029 Uiso 1 1 d . . . 
O448 O 0.0402 0.6684 2.3193 0.024 Uiso 1 1 d . . . 
O449 O 0.0646 0.5786 2.3973 0.050 Uiso 1 1 d . . . 
O450 O -0.0808 0.6119 2.3373 0.022 Uiso 1 1 d . . . 
O451 O 0.0858 0.8200 2.4797 0.030 Uiso 1 1 d . . . 
O452 O -0.0825 0.0778 2.2469 0.038 Uiso 1 1 d . . . 
O453 O 0.2016 0.7150 2.4345 0.038 Uiso 1 1 d . . . 
O454 O -0.0263 0.7702 2.4367 0.013 Uiso 1 1 d . . . 
O455 O -0.0014 0.8697 2.5606 0.038 Uiso 1 1 d . . . 
O456 O -0.1325 0.7336 2.3558 0.031 Uiso 1 1 d . . . 
O457 O -0.0915 0.1389 1.9986 0.035 Uiso 1 1 d . . . 
O458 O -0.0266 0.7360 2.5380 0.023 Uiso 1 1 d . . . 
O459 O -0.0979 0.5771 2.4394 0.020 Uiso 1 1 d . . . 
O460 O -0.0373 0.3274 2.0053 0.039 Uiso 1 1 d . . . 
O461 O 0.0797 0.1723 2.0733 0.031 Uiso 1 1 d . . . 
O462 O 0.1143 0.6711 2.3064 0.029 Uiso 1 1 d . . . 
O463 O 0.0594 0.8764 2.4449 0.029 Uiso 1 1 d . . . 
O464 O -0.1417 0.4987 2.4310 0.047 Uiso 1 1 d . . . 
O465 O 0.2040 0.7986 2.4088 0.040 Uiso 1 1 d . . . 
O466 O 0.0605 0.2918 2.1691 0.032 Uiso 1 1 d . . . 
O467 O 0.0139 0.1490 2.1799 0.030 Uiso 1 1 d . . . 
O468 O -0.0235 0.6439 2.4472 0.021 Uiso 1 1 d . . . 
O469 O 0.0072 0.6118 2.3307 0.019 Uiso 1 1 d . . . 
O470 O 0.0391 0.1900 2.1190 0.030 Uiso 1 1 d . . . 
O471 O 0.1918 0.7404 2.3334 0.033 Uiso 1 1 d . . . 
O472 O -0.1101 0.1555 2.1846 0.020 Uiso 1 1 d . . . 
O473 O 0.0751 0.7168 2.2711 0.027 Uiso 1 1 d . . . 
O474 O -0.0895 0.1744 2.2843 0.027 Uiso 1 1 d . . . 
O475 O -0.0489 0.7987 2.3785 0.025 Uiso 1 1 d . . . 
O476 O -0.0571 0.3585 2.1216 0.024 Uiso 1 1 d . . . 
O477 O -0.1569 0.1886 2.2699 0.031 Uiso 1 1 d . . . 
O478 O -0.0535 0.2916 2.1080 0.019 Uiso 1 1 d . . . 
O479 O 0.1489 0.7477 2.2976 0.034 Uiso 1 1 d . . . 
O480 O -0.1322 0.6693 2.2558 0.025 Uiso 1 1 d . . . 
O481 O -0.0362 0.0862 2.0763 0.026 Uiso 1 1 d . . . 
O482 O 0.0056 0.7214 2.4600 0.017 Uiso 1 1 d . . . 
O483 O 0.0733 0.6627 2.4980 0.026 Uiso 1 1 d . . . 
O484 O -0.0576 0.5296 2.2417 0.033 Uiso 1 1 d . . . 
O485 O 0.0030 0.7129 2.2636 0.020 Uiso 1 1 d . . . 
O486 O 0.0516 0.3625 2.3197 0.033 Uiso 1 1 d . . . 
O487 O -0.0296 0.7875 2.5562 0.025 Uiso 1 1 d . . . 
O488 O -0.0044 0.8257 2.3443 0.026 Uiso 1 1 d . . . 
O489 O -0.0819 0.6038 2.5044 0.019 Uiso 1 1 d . . . 
O490 O -0.0389 0.5303 2.2927 0.031 Uiso 1 1 d . . . 
O491 O -0.0395 0.1024 2.1804 0.032 Uiso 1 1 d . . . 
O492 O -0.1320 0.7722 2.2925 0.016 Uiso 1 1 d . . . 
O493 O 0.0485 0.8078 2.3118 0.027 Uiso 1 1 d . . . 
O494 O 0.0596 0.2359 2.1800 0.019 Uiso 1 1 d . . . 
O495 O -0.1021 0.7400 2.4258 0.031 Uiso 1 1 d . . . 
O496 O 0.0129 0.8227 2.3931 0.021 Uiso 1 1 d . . . 
O497 O -0.0470 0.1485 2.2271 0.019 Uiso 1 1 d . . . 
O498 O -0.1514 0.6090 2.4459 0.024 Uiso 1 1 d . . . 
O499 O 0.1196 0.7872 2.4586 0.030 Uiso 1 1 d . . . 
O500 O 0.0497 0.6429 2.3662 0.025 Uiso 1 1 d . . . 
O501 O 0.0215 0.3204 2.2585 0.029 Uiso 1 1 d . . . 
O502 O -0.0758 0.3019 2.1725 0.018 Uiso 1 1 d . . . 
O503 O -0.0817 0.5902 2.2531 0.020 Uiso 1 1 d . . . 
O504 O -0.0126 0.8372 2.4597 0.019 Uiso 1 1 d . . . 
O505 O -0.1272 0.1226 2.2434 0.019 Uiso 1 1 d . . . 
O506 O -0.1231 0.2273 2.1950 0.024 Uiso 1 1 d . . . 
O507 O -0.1570 0.5681 2.3960 0.026 Uiso 1 1 d . . . 
O508 O -0.0405 0.6774 2.4955 0.016 Uiso 1 1 d . . . 
O509 O -0.0800 0.6971 2.4442 0.016 Uiso 1 1 d . . . 
O510 O 0.0018 0.3892 2.1670 0.032 Uiso 1 1 d . . . 
O511 O 0.0310 0.6898 2.5456 0.030 Uiso 1 1 d . . . 
O512 O -0.0734 0.7887 2.2525 0.028 Uiso 1 1 d . . . 
O513 O -0.0696 0.8335 2.3013 0.026 Uiso 1 1 d . . . 
O514 O -0.1092 0.5391 2.2987 0.025 Uiso 1 1 d . . . 
O515 O -0.0546 0.7102 2.2726 0.023 Uiso 1 1 d . . . 
O516 O 0.0855 0.8289 2.4101 0.019 Uiso 1 1 d . . . 
O517 O -0.0081 0.7628 2.2716 0.022 Uiso 1 1 d . . . 
O518 O -0.0052 0.6005 2.2618 0.026 Uiso 1 1 d . . . 
O519 O -0.1375 0.6198 2.3426 0.029 Uiso 1 1 d . . . 
O520 O 0.0458 0.7592 2.4282 0.022 Uiso 1 1 d . . . 
O521 O 0.0533 0.7072 2.4436 0.019 Uiso 1 1 d . . . 
O522 O 0.0336 0.2618 2.2808 0.026 Uiso 1 1 d . . . 
O523 O 0.1322 0.7367 2.4197 0.020 Uiso 1 1 d . . . 
O524 O -0.0926 0.2440 2.2540 0.021 Uiso 1 1 d . . . 
O525 O -0.2034 0.1361 2.2732 0.032 Uiso 1 1 d . . . 
O526 O -0.0501 0.2050 2.2305 0.019 Uiso 1 1 d . . . 
O527 O 0.1142 0.6821 2.4614 0.026 Uiso 1 1 d . . . 
O528 O -0.0514 0.5608 2.3535 0.025 Uiso 1 1 d . . . 
O529 O -0.1640 0.0888 2.1919 0.019 Uiso 1 1 d . . . 
O530 O -0.0330 0.6467 2.2887 0.015 Uiso 1 1 d . . . 
O531 O -0.0135 0.3074 2.1710 0.019 Uiso 1 1 d . . . 
O532 O -0.1216 0.7901 2.3949 0.023 Uiso 1 1 d . . . 
O533 O -0.0963 0.6352 2.4024 0.015 Uiso 1 1 d . . . 
O534 O -0.1317 0.1284 2.1168 0.021 Uiso 1 1 d . . . 
O535 O -0.0201 0.1592 2.0666 0.027 Uiso 1 1 d . . . 
O536 O 0.1363 0.7663 2.3605 0.014 Uiso 1 1 d . . . 
O537 O 0.1592 0.8238 2.4081 0.029 Uiso 1 1 d . . . 
O538 O -0.0980 0.1594 2.0596 0.026 Uiso 1 1 d . . . 
O539 O -0.1062 0.0937 2.1467 0.021 Uiso 1 1 d . . . 
O540 O 0.0681 0.7193 2.3766 0.014 Uiso 1 1 d . . . 
O541 O 0.0107 0.7893 2.4950 0.020 Uiso 1 1 d . . . 
O543 O 0.5886 0.3201 2.4797 0.031 Uiso 1 1 d . . . 
O277 O -0.1054 0.2970 2.3187 0.044 Uiso 1 1 d . . . 
O278 O -0.0039 0.3652 2.2987 0.047 Uiso 1 1 d . . . 
O279 O -0.0433 0.5505 2.4617 0.053 Uiso 1 1 d . . . 
O280 O -0.0595 0.8921 2.1979 0.116 Uiso 1 1 d . . . 
O281 O -0.2677 0.5117 2.4491 0.109 Uiso 1 1 d . . . 
O282 O -0.1422 0.7849 2.4995 0.105 Uiso 1 1 d . . . 
O283 O -0.0039 0.6655 2.1562 0.066 Uiso 1 1 d . . . 
O542 O 0.2816 0.9498 0.6261 0.058 Uiso 1 1 d . . . 
O544 O 0.2342 0.5541 1.3223 0.059 Uiso 1 1 d . . . 
O545 O 0.2641 0.9555 0.6743 0.056 Uiso 1 1 d . . . 
O546 O 0.2130 0.5517 1.3696 0.102 Uiso 1 1 d . . . 
O5 O 0.6697 0.3325 2.3319 0.061 Uiso 1 1 d . . . 
O6 O 0.4998 0.1359 2.7009 0.037 Uiso 1 1 d . . . 
O7 O 0.6033 0.1999 2.6842 0.033 Uiso 1 1 d . . . 
O8 O 0.2308 0.0139 2.4377 0.113 Uiso 1 1 d . . . 
O9 O 0.5170 0.1690 2.1601 0.085 Uiso 1 1 d . . . 
O10 O 0.3593 0.2863 2.4962 0.110 Uiso 1 1 d . . . 
O11 O 0.4562 0.0502 2.4602 0.041 Uiso 1 1 d . . . 
O37 O 0.6874 0.4472 3.0143 0.075 Uiso 1 1 d . . . 
O1W O 0.3172 0.5047 2.7795 0.117 Uiso 1 1 d . . . 
O2W O 0.6350 0.3828 2.2781 0.094 Uiso 1 1 d . . . 
O3W O 0.6946 0.4888 3.0943 0.091 Uiso 1 1 d . . . 
O4W O 0.4279 0.4126 2.4679 0.182 Uiso 1 1 d . . . 
O5W O 1.2159 0.8853 3.6200 0.080 Uiso 1 1 d . . . 
O6W O -1.1561 0.4096 0.9589 0.198 Uiso 1 1 d . . . 
O7W O 0.6296 0.5189 2.5993 0.220 Uiso 1 1 d . . . 
O8W O 0.3227 0.3356 2.4321 0.170 Uiso 1 1 d . . . 
O9W O 0.7133 0.3813 2.6219 0.288 Uiso 1 1 d . . . 
O10W O 0.5350 0.5779 2.4273 0.326 Uiso 1 1 d . . . 
O11W O 1.1662 0.9410 3.5053 0.126 Uiso 1 1 d . . . 
O12W O 0.3074 0.3448 2.9901 0.235 Uiso 1 1 d . . . 
O13W O 0.6875 0.4824 2.6133 0.210 Uiso 1 1 d . . . 
O14W O 0.5451 0.5595 2.3768 0.199 Uiso 1 1 d . . . 
O15W O -0.7562 0.0698 2.0607 0.355 Uiso 1 1 d . . . 
O16W O 0.1811 0.1612 2.5636 0.154 Uiso 1 1 d . . . 
O17W O 0.3128 0.4295 2.8629 0.115 Uiso 1 1 d . . . 
O18W O 0.7329 0.9360 3.3789 0.103 Uiso 1 1 d . . . 
O19W O 1.0503 1.0580 3.3723 0.102 Uiso 1 1 d . . . 
O20W O 0.6923 0.4025 3.1209 0.098 Uiso 1 1 d . . . 
O21W O 0.5592 0.5797 2.3154 0.093 Uiso 1 1 d . . . 
O22W O 0.7370 0.6599 3.3449 0.109 Uiso 1 1 d . . . 
O23W O 0.7192 0.3637 2.2769 0.081 Uiso 1 1 d . . . 
O24W O 0.3363 0.0824 2.6559 0.069 Uiso 1 1 d . . . 
O25W O 0.4409 -0.0374 1.9875 0.106 Uiso 1 1 d . . . 
O26W O 0.9641 0.9206 3.5717 0.067 Uiso 1 1 d . . . 
O27W O 0.7488 0.0365 2.4767 0.074 Uiso 1 1 d . . . 
O28W O 0.7044 0.5126 2.7238 0.091 Uiso 1 1 d . . . 
O29W O 1.0159 0.9530 3.5333 0.084 Uiso 1 1 d . . . 
O30W O 0.5660 0.0860 2.1567 0.084 Uiso 1 1 d . . . 
O31W O 0.8192 0.0090 3.3899 0.082 Uiso 1 1 d . . . 
O32W O 1.0609 1.0793 3.3098 0.105 Uiso 1 1 d . . . 
O33W O 1.0064 0.6364 3.5949 0.070 Uiso 1 1 d . . . 
O34W O 0.5008 0.1343 2.5942 0.069 Uiso 1 1 d . . . 
O35W O 0.2493 0.9916 0.5897 0.078 Uiso 1 1 d . . . 
O36W O 0.6767 0.3293 2.2201 0.064 Uiso 1 1 d . . . 
O37W O 0.0957 0.0789 2.4681 0.072 Uiso 1 1 d . . . 
O38W O 0.8463 0.1320 3.3467 0.057 Uiso 1 1 d . . . 
O39W O 0.6914 0.4316 3.2401 0.084 Uiso 1 1 d . . . 
O40W O 1.3035 0.2424 3.2913 0.078 Uiso 1 1 d . . . 
O41W O 0.9273 0.3496 3.3671 0.080 Uiso 1 1 d . . . 
O42W O 0.7007 0.3936 3.1854 0.055 Uiso 1 1 d . . . 
O43W O 0.2050 0.9766 0.6715 0.045 Uiso 1 1 d . . . 
O44W O 0.7986 -0.0162 3.2768 0.046 Uiso 1 1 d . . . 
O45W O 0.4323 -0.1483 2.3666 0.063 Uiso 1 1 d . . . 
O46W O 0.7907 0.7365 3.2953 0.050 Uiso 1 1 d . . . 
O47W O 1.0458 0.5629 3.2648 0.050 Uiso 1 1 d . . . 
O48W O 0.7746 0.1855 3.2109 0.042 Uiso 1 1 d . . . 
O49W O 0.5512 0.0621 2.2647 0.042 Uiso 1 1 d . . . 
O50W O 0.7258 0.3130 2.7956 0.034 Uiso 1 1 d . . . 
O51W O 0.5912 0.5761 2.4720 0.153 Uiso 1 1 d . . . 
O52W O 0.7544 0.4621 3.1139 0.096 Uiso 1 1 d . . . 
O53W O 0.2724 0.3735 2.9431 0.092 Uiso 1 1 d . . . 
O54W O 0.8597 0.0821 3.3954 0.102 Uiso 1 1 d . . . 
O55W O 0.7062 0.4720 2.6724 0.182 Uiso 1 1 d . . . 
O56W O 0.5931 0.4106 2.5542 0.102 Uiso 1 1 d . . . 
O57W O 0.7221 0.5613 3.0832 0.097 Uiso 1 1 d . . . 
O58W O 0.2416 0.5086 1.4068 0.143 Uiso 1 1 d . . . 
O59W O 1.1003 0.9148 3.5471 0.098 Uiso 1 1 d . . . 
O60W O 0.1649 -0.0513 2.4414 0.200 Uiso 1 1 d . . . 
O61W O 1.1560 -0.0374 3.2294 0.831 Uiso 1 1 d . . . 
O62W O 1.1264 0.3568 3.0135 0.352 Uiso 1 1 d . . . 
O63W O 0.7727 0.3807 2.9448 0.182 Uiso 1 1 d . . . 
O64W O 0.6363 0.5936 3.5788 0.449 Uiso 1 1 d . . . 
O65W O -0.3418 0.3615 1.6516 0.188 Uiso 1 1 d . . . 
O66W O 0.1894 -0.0871 2.1235 0.404 Uiso 1 1 d . . . 
O67W O 1.2316 0.2246 3.0530 0.334 Uiso 1 1 d . . . 
O68W O 1.1273 1.0253 3.5994 0.163 Uiso 1 1 d . . . 
O69W O 0.3419 0.5057 2.8484 0.106 Uiso 1 1 d . . . 
O70W O 0.0795 0.0928 2.5274 0.125 Uiso 1 1 d . . . 
O71W O 0.8173 0.4601 3.0763 0.205 Uiso 1 1 d . . . 
O72W O 0.6590 0.0249 2.9273 0.195 Uiso 1 1 d . . . 
O73W O 1.1616 0.0106 3.1523 0.392 Uiso 1 1 d . . . 
O74W O 0.1864 0.2888 2.3377 0.213 Uiso 1 1 d . . . 
O75W O 0.2584 0.2806 2.9395 0.115 Uiso 1 1 d . . . 
O76W O 0.8008 0.6868 3.0456 0.314 Uiso 1 1 d . . . 
O77W O 0.1369 0.0663 2.3675 0.370 Uiso 1 1 d . . . 
O78W O 0.6691 0.4388 3.5055 0.322 Uiso 1 1 d . . . 
O79W O 0.8589 0.8215 3.1439 0.208 Uiso 1 1 d . . . 
O80W O 0.6449 0.4168 2.6042 0.251 Uiso 1 1 d . . . 
O81W O 0.2100 -0.0980 2.1910 0.354 Uiso 1 1 d . . . 
O82W O -0.0382 0.5459 2.0028 0.259 Uiso 1 1 d . . . 
O83W O 0.8256 0.1526 2.7613 0.632 Uiso 1 1 d . . . 
O84W O 0.0448 0.3781 2.0332 0.111 Uiso 1 1 d . . . 
O85W O -1.0619 0.9170 1.1378 0.216 Uiso 1 1 d . . . 
O86W O 0.2469 0.5371 1.4714 0.097 Uiso 1 1 d . . . 
O87W O 1.1492 0.4092 3.0638 0.704 Uiso 1 1 d . . . 
O88W O -0.0083 0.9811 2.1353 0.288 Uiso 1 1 d . . . 
O89W O 0.3602 0.3435 2.1370 0.481 Uiso 1 1 d . . . 
O90W O 1.0170 1.0149 3.5213 0.400 Uiso 1 1 d . . . 
O91W O 0.4189 0.0701 1.9943 0.394 Uiso 1 1 d . . . 
O92W O 0.9437 0.4138 2.8422 0.130 Uiso 1 1 d . . . 
O93W O 0.7653 0.5582 3.6268 0.180 Uiso 1 1 d . . . 
O94W O -0.1038 0.4332 2.0129 0.176 Uiso 1 1 d . . . 
O95W O 1.1911 0.1673 3.0142 0.288 Uiso 1 1 d . . . 
O96W O 0.1371 0.0906 2.5686 0.179 Uiso 1 1 d . . . 
O97W O 0.2386 0.1580 2.3405 0.125 Uiso 1 1 d . . . 
O98W O 0.1779 0.1258 2.3401 0.189 Uiso 1 1 d . . . 
O99W O 0.2506 0.2468 2.3617 0.180 Uiso 1 1 d . . . 
O902 O 0.5184 0.4476 2.5385 0.200 Uiso 1 1 d . . . 
O901 O 1.0863 0.9749 3.5609 0.205 Uiso 1 1 d . . . 
O900 O -0.8691 -0.0987 1.2846 0.253 Uiso 1 1 d . . . 
C4 C 0.6377 0.5952 2.9329 0.715 Uiso 1 1 d D . . 
C5 C 0.6556 0.5337 2.9440 0.352 Uiso 1 1 d D . . 
C14 C 0.6241 0.5325 2.9261 0.174 Uiso 1 1 d D . . 
C15 C 0.2806 0.3679 2.3589 0.467 Uiso 1 1 d D . . 
C16 C 0.2931 0.3986 2.3104 1.006 Uiso 1 1 d D . . 
C17 C 0.3099 0.3749 2.3011 0.519 Uiso 1 1 d D . . 
C19 C 0.3057 0.3498 2.3527 0.156 Uiso 1 1 d D . . 
C20 C 0.3149 0.3494 2.3212 0.122 Uiso 1 1 d D . . 
C22 C 0.8584 0.3012 2.8860 0.188 Uiso 1 1 d . . . 
C23 C 0.3192 0.2336 3.0501 1.134 Uiso 1 1 d D . . 
C24 C 0.1897 0.0108 2.3465 0.395 Uiso 1 1 d D . . 
C25 C 0.2525 0.1992 2.8018 0.186 Uiso 1 1 d . . . 
C26 C 0.4081 0.3339 3.0510 0.271 Uiso 1 1 d . . . 
C27 C 0.7203 0.5435 2.8767 0.187 Uiso 1 1 d . . . 
C28 C 0.5209 0.3194 3.0873 0.190 Uiso 1 1 d D . . 
C30 C 0.2903 0.2303 2.1309 0.186 Uiso 1 1 d . . . 
C31 C 0.3483 0.2318 3.0329 0.621 Uiso 1 1 d D . . 
C32 C 0.1935 0.0034 2.2901 0.148 Uiso 1 1 d D . . 
C33 C 0.4784 0.4551 2.1584 0.136 Uiso 1 1 d . . . 
C34 C 0.3297 0.2657 2.9924 0.290 Uiso 1 1 d D . . 
C35 C 0.6910 0.0993 2.8530 0.119 Uiso 1 1 d D . . 
C36 C 0.4271 0.0158 2.9233 0.313 Uiso 1 1 d . . . 
C37 C 0.3925 -0.0125 2.9265 0.284 Uiso 1 1 d . . . 
C38 C 0.4367 0.0954 2.0767 0.238 Uiso 1 1 d D . . 
C39 C 0.2183 0.1665 2.4335 0.121 Uiso 1 1 d . . . 
C40 C 0.2616 0.2185 2.5393 0.142 Uiso 1 1 d . . . 
C41 C 0.3456 0.0200 2.9007 0.172 Uiso 1 1 d . . . 
C42 C 0.3176 0.2566 2.1606 0.177 Uiso 1 1 d . . . 
C43 C 0.6129 0.5622 2.9221 0.265 Uiso 1 1 d D . . 
C44 C 0.2348 0.0774 2.5382 0.173 Uiso 1 1 d . . . 
C45 C 0.4981 0.2598 3.1082 0.185 Uiso 1 1 d D . . 
C46 C 0.2951 0.2222 2.7464 0.139 Uiso 1 1 d . . . 
C47 C 0.5101 0.2741 3.1393 0.211 Uiso 1 1 d D . . 
C49 C 0.4268 0.5255 2.8953 0.124 Uiso 1 1 d . . . 
C50 C 0.2562 0.0679 2.5123 0.109 Uiso 1 1 d . . . 
C51 C 0.5045 0.4705 2.4052 0.128 Uiso 1 1 d . . . 
C52 C 0.4292 0.3549 3.0190 0.175 Uiso 1 1 d . . . 
C53 C 0.7691 0.1766 2.9007 0.134 Uiso 1 1 d . . . 
C54 C 0.1710 0.0358 2.5177 0.215 Uiso 1 1 d . . . 
C55 C 0.4840 0.4695 2.3534 0.100 Uiso 1 1 d . . . 
C56 C 0.2700 0.1757 2.1612 0.154 Uiso 1 1 d . . . 
C57 C 0.5825 0.1620 3.0855 0.139 Uiso 1 1 d . . . 
C58 C 0.4817 0.5275 2.9218 0.143 Uiso 1 1 d . . . 
C59 C 0.2327 0.1391 2.8731 0.142 Uiso 1 1 d . . . 
C60 C 0.1799 0.1512 2.4444 0.112 Uiso 1 1 d . . . 
C61 C 0.2257 0.1934 2.8964 0.126 Uiso 1 1 d . . . 
C62 C 0.7935 0.2850 2.8433 0.101 Uiso 1 1 d . . . 
C63 C 0.4694 0.1558 2.0626 0.140 Uiso 1 1 d D . . 
C64 C 0.4526 0.4231 2.2099 0.103 Uiso 1 1 d . . . 
C65 C 0.2546 0.2049 2.7485 0.110 Uiso 1 1 d . . . 
C66 C 0.3073 -0.0506 2.2585 0.099 Uiso 1 1 d . . . 
C67 C 0.5536 0.4621 2.6523 0.097 Uiso 1 1 d . . . 
C68 C 0.6858 0.1338 2.7114 0.133 Uiso 1 1 d . . . 
C69 C 0.6784 0.5666 2.9576 0.362 Uiso 1 1 d D . . 
C70 C 0.2924 0.2181 2.8092 0.127 Uiso 1 1 d . . . 
C71 C 0.4071 0.1842 2.1044 0.135 Uiso 1 1 d . . . 
C72 C 0.4552 0.1032 2.1065 0.121 Uiso 1 1 d D . . 
C73 C 0.5321 0.3337 3.1182 0.265 Uiso 1 1 d D . . 
C74 C 0.3532 0.2478 3.0034 0.162 Uiso 1 1 d D . . 
C75 C 0.7628 0.5325 2.9257 0.301 Uiso 1 1 d . . . 
C76 C 0.3999 0.2426 2.1119 0.170 Uiso 1 1 d . . . 
C77 C 0.1903 0.0256 2.4897 0.162 Uiso 1 1 d . . . 
C78 C 0.2947 0.1925 2.4900 0.135 Uiso 1 1 d . . . 
C79 C 0.4642 0.4214 2.1811 0.093 Uiso 1 1 d . . . 
C80 C 0.7239 0.1330 2.9304 0.136 Uiso 1 1 d . . . 
C81 C 0.6886 0.1553 2.6600 0.139 Uiso 1 1 d . . . 
C82 C 0.4386 0.3922 2.2294 0.085 Uiso 1 1 d . . . 
C83 C 0.2678 0.1712 2.5076 0.125 Uiso 1 1 d . . . 
C84 C 0.2229 0.0397 2.3473 0.154 Uiso 1 1 d D . . 
C85 C 0.1809 0.0952 2.4384 0.086 Uiso 1 1 d . . . 
C86 C 0.2258 0.0341 2.2910 0.152 Uiso 1 1 d D . . 
C87 C 0.5704 0.1672 3.0534 0.082 Uiso 1 1 d . . . 
C88 C 0.3983 0.4755 2.8004 0.147 Uiso 1 1 d . . . 
C89 C 0.6152 0.3063 3.1525 0.100 Uiso 1 1 d . . . 
C90 C 0.4522 0.4556 2.2260 0.091 Uiso 1 1 d . . . 
C91 C 0.7047 0.4991 2.8761 0.155 Uiso 1 1 d . . . 
C92 C 0.3806 0.0459 2.8929 0.084 Uiso 1 1 d . . . 
C93 C 0.7172 0.1287 2.8061 0.110 Uiso 1 1 d D . . 
C94 C 0.5619 0.4236 2.1834 0.099 Uiso 1 1 d . . . 
C95 C 0.4645 0.4870 2.2096 0.128 Uiso 1 1 d . . . 
C96 C 0.8195 0.3106 2.9020 0.112 Uiso 1 1 d . . . 
C97 C 0.3481 0.0471 2.5890 0.087 Uiso 1 1 d . . . 
C98 C 0.7495 0.4845 2.9293 0.327 Uiso 1 1 d . . . 
C99 C 0.2933 0.3354 2.7348 0.136 Uiso 1 1 d . . . 
C100 C 0.5875 0.4823 2.4809 0.100 Uiso 1 1 d . . . 
C101 C 0.3094 0.0056 2.1913 0.123 Uiso 1 1 d . . . 
C102 C 0.7539 0.4010 2.8269 0.026 Uiso 1 1 d . . . 
C103 C 0.7964 0.4094 2.8327 0.029 Uiso 1 1 d . . . 
C104 C 0.7017 0.2125 2.5377 0.037 Uiso 1 1 d . . . 
C105 C 0.4691 0.2546 2.5570 0.025 Uiso 1 1 d . . . 
C106 C 0.6046 0.1763 2.4930 0.022 Uiso 1 1 d . . . 
C107 C 0.7028 0.1870 2.4220 0.023 Uiso 1 1 d . . . 
C108 C 0.6853 0.2490 2.3120 0.024 Uiso 1 1 d . . . 
C109 C 0.5921 0.0957 2.4169 0.020 Uiso 1 1 d . . . 
C110 C 0.4485 0.2563 2.6121 0.048 Uiso 1 1 d . . . 
C111 C 0.6123 0.1552 2.2848 0.026 Uiso 1 1 d . . . 
C112 C 0.6247 0.2400 2.9960 0.018 Uiso 1 1 d . . . 
C113 C 0.6976 0.3166 2.6938 0.019 Uiso 1 1 d . . . 
C114 C 0.6553 0.2921 2.5259 0.039 Uiso 1 1 d . . . 
C115 C 0.6366 0.1613 2.8262 0.034 Uiso 1 1 d . . . 
C116 C 0.7155 0.1583 2.4390 0.033 Uiso 1 1 d . . . 
C117 C 0.5419 0.2171 2.5421 0.030 Uiso 1 1 d . . . 
C118 C 0.3841 -0.0623 2.4267 0.028 Uiso 1 1 d . . . 
C119 C 0.5474 0.1388 3.0380 0.044 Uiso 1 1 d . . . 
C120 C 0.4658 0.2073 2.5966 0.036 Uiso 1 1 d . . . 
C121 C 0.4723 -0.0017 2.4525 0.029 Uiso 1 1 d . . . 
C122 C 0.6731 0.2016 2.5117 0.037 Uiso 1 1 d . . . 
C123 C 0.4545 0.0155 2.2643 0.034 Uiso 1 1 d . . . 
C124 C 0.6132 0.3068 2.4827 0.017 Uiso 1 1 d . . . 
C125 C 0.4410 0.2419 2.6430 0.028 Uiso 1 1 d . . . 
C126 C 0.6096 0.0751 2.4401 0.021 Uiso 1 1 d . . . 
C127 C 0.5630 0.3119 2.6993 0.021 Uiso 1 1 d . . . 
C128 C 0.4621 0.0869 2.6706 0.022 Uiso 1 1 d . . . 
C129 C 0.4834 0.1092 2.8027 0.019 Uiso 1 1 d . . . 
C130 C 0.3872 0.0798 2.5093 0.022 Uiso 1 1 d . . . 
C131 C 0.6358 0.1871 2.5189 0.020 Uiso 1 1 d . . . 
C132 C 0.3800 0.1807 2.5078 0.023 Uiso 1 1 d . . . 
C133 C 0.4685 0.1232 2.6851 0.027 Uiso 1 1 d . . . 
C134 C 0.6306 0.5219 2.8093 0.022 Uiso 1 1 d . . . 
C135 C 0.4620 0.2402 2.5898 0.027 Uiso 1 1 d . . . 
C136 C 0.5288 0.4493 2.2831 0.066 Uiso 1 1 d . . . 
C137 C 0.7315 0.3912 2.3549 0.050 Uiso 1 1 d . . . 
C138 C 0.5871 0.2620 3.0987 0.052 Uiso 1 1 d . . . 
C139 C 0.3610 0.0713 2.1310 0.066 Uiso 1 1 d . . . 
C140 C 0.3415 0.1198 2.1493 0.073 Uiso 1 1 d . . . 
C141 C 0.6075 0.4653 2.7007 0.058 Uiso 1 1 d . . . 
C142 C 0.6006 0.3790 2.1980 0.054 Uiso 1 1 d . . . 
C143 C 0.7910 0.2987 2.8746 0.062 Uiso 1 1 d . . . 
C144 C 0.3858 -0.0526 2.3695 0.059 Uiso 1 1 d . . . 
C145 C 0.5988 0.4675 2.4162 0.065 Uiso 1 1 d . . . 
C146 C 0.4322 0.2141 2.1953 0.042 Uiso 1 1 d . . . 
C147 C 0.3979 0.3044 2.6508 0.048 Uiso 1 1 d . . . 
C148 C 0.6268 0.5475 2.8282 0.053 Uiso 1 1 d . . . 
C149 C 0.6643 0.2008 2.9995 0.056 Uiso 1 1 d . . . 
C150 C 0.6479 0.0727 2.4875 0.048 Uiso 1 1 d . . . 
C151 C 0.5960 0.4949 2.9089 0.054 Uiso 1 1 d D . . 
C152 C 0.5804 0.4983 2.3237 0.068 Uiso 1 1 d . . . 
C153 C 0.2360 0.1409 2.4249 0.055 Uiso 1 1 d . . . 
C154 C 0.3219 0.0331 2.2142 0.072 Uiso 1 1 d . . . 
C155 C 0.3105 0.1164 2.7993 0.058 Uiso 1 1 d . . . 
C156 C 0.8591 0.4336 2.8149 0.054 Uiso 1 1 d . . . 
C157 C 0.5261 0.3307 2.6189 0.076 Uiso 1 1 d . . . 
C158 C 0.7122 0.2749 2.2601 0.040 Uiso 1 1 d . . . 
C159 C 0.6022 0.5025 2.4271 0.079 Uiso 1 1 d . . . 
C160 C 0.4451 0.3553 2.6155 0.056 Uiso 1 1 d . . . 
C161 C 0.6378 0.1370 2.2366 0.053 Uiso 1 1 d . . . 
C162 C 0.3417 -0.0213 2.2698 0.063 Uiso 1 1 d . . . 
C163 C 0.4142 0.0429 2.9052 0.062 Uiso 1 1 d . . . 
C164 C 0.3380 0.2569 2.4812 0.075 Uiso 1 1 d . . . 
C165 C 0.4505 0.0735 2.8997 0.038 Uiso 1 1 d . . . 
C166 C 0.3572 0.3534 2.8127 0.048 Uiso 1 1 d . . . 
C167 C 0.4166 0.4325 2.7722 0.072 Uiso 1 1 d . . . 
C168 C 0.6329 0.5472 3.0440 0.064 Uiso 1 1 d . . . 
C169 C 0.4734 0.0228 2.1560 0.059 Uiso 1 1 d . . . 
C170 C 0.3098 0.0232 2.7286 0.049 Uiso 1 1 d . . . 
C171 C 0.6481 0.1719 2.6979 0.047 Uiso 1 1 d . . . 
C172 C 0.6824 0.2530 3.0337 0.054 Uiso 1 1 d . . . 
C173 C 0.2859 0.1861 2.8909 0.045 Uiso 1 1 d . . . 
C174 C 0.4216 0.0251 2.6617 0.040 Uiso 1 1 d . . . 
C175 C 0.6394 0.5834 2.8188 0.058 Uiso 1 1 d . . . 
C176 C 0.6477 0.5311 2.7803 0.060 Uiso 1 1 d . . . 
C177 C 0.5928 0.3022 2.5940 0.053 Uiso 1 1 d . . . 
C178 C 0.3923 0.1037 2.1809 0.046 Uiso 1 1 d . . . 
C179 C 0.4578 0.1928 2.6268 0.048 Uiso 1 1 d . . . 
C180 C 0.2761 0.0831 2.3280 0.042 Uiso 1 1 d . . . 
C181 C 0.6761 0.3032 2.5557 0.053 Uiso 1 1 d . . . 
C182 C 0.4643 -0.0064 2.1346 0.046 Uiso 1 1 d . . . 
C183 C 0.4475 0.3751 2.3838 0.038 Uiso 1 1 d . . . 
C184 C 0.6983 0.1526 2.9255 0.071 Uiso 1 1 d . . . 
C185 C 0.7181 0.0979 2.4355 0.041 Uiso 1 1 d . . . 
C186 C 0.5739 0.2791 2.5680 0.045 Uiso 1 1 d . . . 
C187 C 0.6280 0.5107 3.0359 0.059 Uiso 1 1 d . . . 
C188 C 0.4331 0.3275 2.6650 0.047 Uiso 1 1 d . . . 
C189 C 0.4145 0.0917 2.5646 0.045 Uiso 1 1 d . . . 
C190 C 0.5731 0.4017 2.4240 0.044 Uiso 1 1 d . . . 
C191 C 0.5768 0.4612 2.3239 0.051 Uiso 1 1 d . . . 
C192 C 0.5832 0.4399 2.4376 0.049 Uiso 1 1 d . . . 
C193 C 0.5677 0.3729 2.2103 0.043 Uiso 1 1 d . . . 
C194 C 0.4651 0.0325 2.7440 0.044 Uiso 1 1 d . . . 
C195 C 0.7873 0.3948 2.4436 0.048 Uiso 1 1 d . . . 
C196 C 0.3354 -0.0008 2.2966 0.037 Uiso 1 1 d . . . 
C197 C 0.4663 0.3713 3.0190 0.054 Uiso 1 1 d . . . 
C198 C 0.4283 0.4303 2.9058 0.051 Uiso 1 1 d . . . 
C199 C 0.3506 0.0497 2.5542 0.050 Uiso 1 1 d . . . 
C200 C 0.7430 0.1341 2.4828 0.043 Uiso 1 1 d . . . 
C201 C 0.3899 -0.0958 2.4200 0.038 Uiso 1 1 d . . . 
C381 C 0.4287 -0.0781 2.2285 0.050 Uiso 1 1 d . . . 
C203 C 0.4446 0.4103 2.7726 0.058 Uiso 1 1 d . . . 
C204 C 0.7106 0.1849 2.9110 0.037 Uiso 1 1 d . . . 
C205 C 0.5588 0.3326 2.6687 0.050 Uiso 1 1 d . . . 
C206 C 0.6711 0.3599 2.5554 0.054 Uiso 1 1 d . . . 
C207 C 0.4341 -0.0415 2.2298 0.051 Uiso 1 1 d . . . 
C208 C 0.6019 0.4932 3.0124 0.039 Uiso 1 1 d . . . 
C209 C 0.7100 0.1645 2.2628 0.063 Uiso 1 1 d . . . 
C210 C 0.3300 0.3586 2.7864 0.041 Uiso 1 1 d . . . 
C211 C 0.3113 0.2334 2.7802 0.046 Uiso 1 1 d . . . 
C212 C 0.5875 0.2517 2.6242 0.043 Uiso 1 1 d . . . 
C213 C 0.7610 0.4203 2.3663 0.051 Uiso 1 1 d . . . 
C214 C 0.3465 0.3352 2.3148 0.046 Uiso 1 1 d . . . 
C215 C 0.4561 0.3543 2.6481 0.045 Uiso 1 1 d . . . 
C216 C 0.7413 0.2818 2.2387 0.048 Uiso 1 1 d . . . 
C217 C 0.5841 0.0593 2.8935 0.026 Uiso 1 1 d . . . 
C218 C 0.4587 -0.0509 2.4887 0.049 Uiso 1 1 d . . . 
C219 C 0.4619 0.0096 2.7943 0.042 Uiso 1 1 d . . . 
C220 C 0.7771 0.2622 2.2724 0.046 Uiso 1 1 d . . . 
C221 C 0.4896 0.0789 2.6577 0.038 Uiso 1 1 d . . . 
C222 C 0.3059 0.0605 2.2148 0.048 Uiso 1 1 d . . . 
C223 C 0.6605 0.3583 2.3447 0.051 Uiso 1 1 d . . . 
C224 C 0.6875 0.4213 2.3690 0.058 Uiso 1 1 d . . . 
C225 C 0.3586 0.0753 2.7538 0.034 Uiso 1 1 d . . . 
C226 C 0.4728 0.0676 2.7553 0.042 Uiso 1 1 d . . . 
C227 C 0.8208 0.4285 2.8092 0.043 Uiso 1 1 d . . . 
C228 C 0.2734 0.1559 2.4118 0.040 Uiso 1 1 d . . . 
C229 C 0.3995 -0.0187 2.1439 0.043 Uiso 1 1 d . . . 
C230 C 0.7621 0.3623 2.4339 0.040 Uiso 1 1 d . . . 
C231 C 0.7162 0.2597 2.2891 0.035 Uiso 1 1 d . . . 
C232 C 0.7236 0.3584 2.4318 0.028 Uiso 1 1 d . . . 
C233 C 0.5571 0.4267 2.7357 0.028 Uiso 1 1 d . . . 
C234 C 0.4105 0.0122 2.1649 0.044 Uiso 1 1 d . . . 
C235 C 0.4381 -0.0827 2.2830 0.046 Uiso 1 1 d . . . 
C236 C 0.3366 0.0583 2.7263 0.041 Uiso 1 1 d . . . 
C237 C 0.7405 0.4171 2.4544 0.045 Uiso 1 1 d . . . 
C238 C 0.6038 0.2987 3.0956 0.038 Uiso 1 1 d . . . 
C239 C 0.5523 0.4380 2.3048 0.044 Uiso 1 1 d . . . 
C240 C 0.5453 0.3977 2.3080 0.032 Uiso 1 1 d . . . 
C241 C 0.6555 0.1961 2.5738 0.037 Uiso 1 1 d . . . 
C242 C 0.7125 0.3863 2.4429 0.039 Uiso 1 1 d . . . 
C243 C 0.3433 0.1377 2.8247 0.038 Uiso 1 1 d . . . 
C244 C 0.6257 0.1843 2.5507 0.045 Uiso 1 1 d . . . 
C245 C 0.7505 0.3031 2.8804 0.048 Uiso 1 1 d . . . 
C246 C 0.3620 0.0956 2.1521 0.048 Uiso 1 1 d . . . 
C247 C 0.5320 0.3149 2.6463 0.063 Uiso 1 1 d . . . 
C248 C 0.5734 0.0288 2.8714 0.027 Uiso 1 1 d . . . 
C249 C 0.5673 0.2274 2.5996 0.043 Uiso 1 1 d . . . 
C250 C 0.3185 0.0900 2.2403 0.042 Uiso 1 1 d . . . 
C251 C 0.6333 0.0942 2.4651 0.035 Uiso 1 1 d . . . 
C252 C 0.4820 0.0435 2.6479 0.039 Uiso 1 1 d . . . 
C253 C 0.6449 0.1519 2.2675 0.039 Uiso 1 1 d . . . 
C254 C 0.4390 0.4707 2.9063 0.035 Uiso 1 1 d . . . 
C255 C 0.5999 0.0382 2.4367 0.035 Uiso 1 1 d . . . 
C256 C 0.6479 0.3516 2.5252 0.050 Uiso 1 1 d . . . 
C257 C 0.4675 0.4140 2.3820 0.041 Uiso 1 1 d . . . 
C258 C 0.6994 0.4381 2.8992 0.044 Uiso 1 1 d . . . 
C259 C 0.4451 -0.0245 2.2606 0.028 Uiso 1 1 d . . . 
C260 C 0.3856 0.1119 2.7532 0.038 Uiso 1 1 d . . . 
C261 C 0.6168 0.0201 2.4586 0.047 Uiso 1 1 d . . . 
C262 C 0.6963 0.3246 2.4184 0.030 Uiso 1 1 d . . . 
C263 C 0.6226 0.1930 2.7063 0.026 Uiso 1 1 d . . . 
C264 C 0.3693 0.2067 2.5596 0.032 Uiso 1 1 d . . . 
C265 C 0.6787 0.1639 2.2816 0.054 Uiso 1 1 d . . . 
C266 C 0.7321 0.1624 2.4691 0.033 Uiso 1 1 d . . . 
C267 C 0.7428 0.3206 2.6546 0.055 Uiso 1 1 d . . . 
C268 C 0.6750 0.2835 2.6798 0.040 Uiso 1 1 d . . . 
C269 C 0.5372 0.1442 3.0020 0.029 Uiso 1 1 d . . . 
C270 C 0.4852 0.3771 2.9888 0.031 Uiso 1 1 d . . . 
C271 C 0.4695 0.0436 2.8083 0.036 Uiso 1 1 d . . . 
C272 C 0.3293 0.2022 2.8948 0.033 Uiso 1 1 d . . . 
C273 C 0.5956 0.4558 3.0027 0.042 Uiso 1 1 d . . . 
C274 C 0.3846 -0.0409 2.4018 0.044 Uiso 1 1 d . . . 
C275 C 0.5682 0.4464 2.7052 0.036 Uiso 1 1 d . . . 
C276 C 0.4427 0.3216 2.6997 0.041 Uiso 1 1 d . . . 
C277 C 0.6395 0.3170 2.5112 0.037 Uiso 1 1 d . . . 
C278 C 0.3656 0.1776 2.5394 0.025 Uiso 1 1 d . . . 
C279 C 0.6844 0.2066 2.9056 0.032 Uiso 1 1 d . . . 
C280 C 0.3856 0.0730 2.5433 0.028 Uiso 1 1 d . . . 
C281 C 0.6938 0.3913 2.3564 0.038 Uiso 1 1 d . . . 
C282 C 0.7499 0.2532 2.2972 0.035 Uiso 1 1 d . . . 
C283 C 0.6585 0.2312 3.0102 0.035 Uiso 1 1 d . . . 
C284 C 0.5617 0.2425 2.5704 0.033 Uiso 1 1 d . . . 
C285 C 0.6142 0.4833 2.8188 0.031 Uiso 1 1 d . . . 
C286 C 0.4556 -0.0168 2.4815 0.035 Uiso 1 1 d . . . 
C287 C 0.3804 -0.0036 2.4051 0.029 Uiso 1 1 d . . . 
C288 C 0.3695 0.0305 2.3093 0.024 Uiso 1 1 d . . . 
C289 C 0.4721 0.0344 2.4428 0.040 Uiso 1 1 d . . . 
C290 C 0.4261 0.0606 2.6735 0.042 Uiso 1 1 d . . . 
C291 C 0.6901 0.2705 2.6539 0.046 Uiso 1 1 d . . . 
C292 C 0.4909 -0.0215 2.4336 0.043 Uiso 1 1 d . . . 
C293 C 0.6850 0.3302 2.7221 0.025 Uiso 1 1 d . . . 
C294 C 0.4442 -0.0466 2.2879 0.043 Uiso 1 1 d . . . 
C295 C 0.6653 0.1400 2.8272 0.037 Uiso 1 1 d D . . 
C296 C 0.7090 0.1272 2.4227 0.039 Uiso 1 1 d . . . 
C297 C 0.4749 0.0716 2.7882 0.026 Uiso 1 1 d . . . 
C298 C 0.3535 0.2528 2.7843 0.028 Uiso 1 1 d . . . 
C299 C 0.7320 0.3359 2.6808 0.032 Uiso 1 1 d . . . 
C300 C 0.4752 0.4915 2.9210 0.067 Uiso 1 1 d . . . 
C301 C 0.2938 0.2446 2.5235 0.099 Uiso 1 1 d . . . 
C302 C 0.5469 0.0982 3.0804 0.079 Uiso 1 1 d . . . 
C303 C 0.2731 0.1523 2.8799 0.114 Uiso 1 1 d . . . 
C304 C 0.4223 0.4534 2.7996 0.086 Uiso 1 1 d . . . 
C305 C 0.3702 0.4531 2.7460 0.124 Uiso 1 1 d . . . 
C306 C 0.4905 0.1639 2.0929 0.152 Uiso 1 1 d D . . 
C307 C 0.4242 0.1878 2.1399 0.094 Uiso 1 1 d . . . 
C308 C 0.7213 0.4801 2.9033 0.134 Uiso 1 1 d . . . 
C309 C 0.4053 0.2405 2.1478 0.102 Uiso 1 1 d . . . 
C310 C 0.4210 0.2142 2.1605 0.074 Uiso 1 1 d . . . 
C311 C 0.4945 0.2722 3.0462 0.077 Uiso 1 1 d D . . 
C312 C 0.4806 0.1362 2.1142 0.072 Uiso 1 1 d D . . 
C313 C 0.5452 0.3922 2.2033 0.072 Uiso 1 1 d . . . 
C314 C 0.7148 0.2415 3.0471 0.077 Uiso 1 1 d . . . 
C315 C 0.4103 0.0895 2.6012 0.095 Uiso 1 1 d . . . 
C316 C 0.5317 0.4867 2.2829 0.090 Uiso 1 1 d . . . 
C317 C 0.6643 0.1166 2.8515 0.073 Uiso 1 1 d D . . 
C318 C 0.3146 0.1128 2.1202 0.098 Uiso 1 1 d . . . 
C319 C 0.4176 0.4878 2.8936 0.065 Uiso 1 1 d . . . 
C320 C 0.3950 -0.0852 2.3668 0.109 Uiso 1 1 d . . . 
C321 C 0.5033 0.2832 3.0836 0.106 Uiso 1 1 d D . . 
C322 C 0.5859 0.2473 3.1299 0.081 Uiso 1 1 d . . . 
C323 C 0.3355 0.0655 2.1018 0.103 Uiso 1 1 d . . . 
C324 C 0.3424 0.1406 2.5829 0.095 Uiso 1 1 d . . . 
C325 C 0.5825 0.3650 2.6671 0.111 Uiso 1 1 d . . . 
C326 C 0.6605 0.1538 2.7201 0.063 Uiso 1 1 d . . . 
C327 C 0.5516 0.3405 2.2320 0.048 Uiso 1 1 d . . . 
C328 C 0.2995 0.1960 2.1872 0.091 Uiso 1 1 d . . . 
C329 C 0.5841 0.5464 3.0092 0.078 Uiso 1 1 d . . . 
C330 C 0.5729 0.3833 2.6309 0.126 Uiso 1 1 d . . . 
C331 C 0.4858 0.4335 2.4096 0.100 Uiso 1 1 d . . . 
C332 C 0.4687 0.3792 3.0779 0.100 Uiso 1 1 d . . . 
C333 C 0.2869 0.0815 2.8087 0.091 Uiso 1 1 d . . . 
C334 C 0.2680 0.0291 2.1672 0.109 Uiso 1 1 d . . . 
C335 C 0.3937 0.4292 2.7455 0.069 Uiso 1 1 d . . . 
C336 C 0.2865 0.3863 2.7617 0.076 Uiso 1 1 d . . . 
C337 C 0.3136 0.3870 2.7894 0.073 Uiso 1 1 d . . . 
C338 C 0.2480 0.0354 2.4606 0.105 Uiso 1 1 d . . . 
C339 C 0.6216 0.3209 3.1209 0.075 Uiso 1 1 d . . . 
C340 C 0.5769 0.4454 2.4694 0.054 Uiso 1 1 d . . . 
C341 C 0.2187 0.1057 2.4253 0.071 Uiso 1 1 d . . . 
C342 C 0.6609 0.5685 2.7727 0.076 Uiso 1 1 d . . . 
C343 C 0.2410 0.0501 2.3203 0.084 Uiso 1 1 d D . . 
C344 C 0.3060 0.1327 2.7701 0.067 Uiso 1 1 d . . . 
C345 C 0.2558 0.0681 2.7830 0.082 Uiso 1 1 d . . . 
C346 C 0.3897 0.2532 2.9817 0.068 Uiso 1 1 d . . . 
C347 C 0.7204 0.4510 2.3807 0.093 Uiso 1 1 d . . . 
C348 C 0.5383 0.1040 3.0475 0.061 Uiso 1 1 d . . . 
C349 C 0.4864 0.3834 3.0470 0.068 Uiso 1 1 d . . . 
C350 C 0.2744 0.0563 2.1923 0.087 Uiso 1 1 d . . . 
C351 C 0.2326 0.0472 2.4908 0.089 Uiso 1 1 d . . . 
C352 C 0.6684 0.1363 2.2185 0.072 Uiso 1 1 d . . . 
C353 C 0.2649 0.2052 2.9032 0.059 Uiso 1 1 d . . . 
C354 C 0.6963 0.1905 3.0106 0.060 Uiso 1 1 d . . . 
C355 C 0.3451 0.2485 2.2172 0.068 Uiso 1 1 d . . . 
C356 C 0.7462 0.1974 2.8999 0.075 Uiso 1 1 d . . . 
C357 C 0.2758 0.1113 2.7464 0.084 Uiso 1 1 d . . . 
C358 C 0.6915 0.1473 2.8050 0.058 Uiso 1 1 d D . . 
C359 C 0.3079 0.2308 2.4985 0.089 Uiso 1 1 d . . . 
C360 C 0.3886 0.3092 2.6191 0.072 Uiso 1 1 d . . . 
C361 C 0.3592 0.2030 2.5903 0.072 Uiso 1 1 d . . . 
C362 C 0.8490 0.4036 2.8654 0.065 Uiso 1 1 d . . . 
C363 C 0.2999 -0.0058 2.3063 0.063 Uiso 1 1 d . . . 
C364 C 0.6149 0.4800 2.6697 0.100 Uiso 1 1 d . . . 
C365 C 0.6167 0.4097 2.1798 0.056 Uiso 1 1 d . . . 
C366 C 0.3236 0.3388 2.7594 0.102 Uiso 1 1 d . . . 
C367 C 0.5779 0.5092 2.9999 0.074 Uiso 1 1 d . . . 
C368 C 0.3484 0.1436 2.5510 0.053 Uiso 1 1 d . . . 
C369 C 0.3166 0.2295 2.1864 0.075 Uiso 1 1 d . . . 
C370 C 0.4907 -0.0548 2.4437 0.053 Uiso 1 1 d . . . 
C371 C 0.4626 0.4289 2.3536 0.069 Uiso 1 1 d . . . 
C372 C 0.3557 0.0549 2.7808 0.063 Uiso 1 1 d . . . 
C373 C 0.6034 0.3143 3.0621 0.039 Uiso 1 1 d . . . 
C374 C 0.3253 0.0192 2.7815 0.080 Uiso 1 1 d . . . 
C375 C 0.8085 0.3961 2.8611 0.040 Uiso 1 1 d . . . 
C376 C 0.6605 0.1741 2.6661 0.070 Uiso 1 1 d . . . 
C377 C 0.2690 -0.0373 2.2889 0.079 Uiso 1 1 d . . . 
C378 C 0.5421 0.4455 2.6828 0.058 Uiso 1 1 d . . . 
C379 C 0.4951 0.1383 2.1478 0.057 Uiso 1 1 d . . . 
C380 C 0.2315 0.3027 2.0916 0.495 Uiso 1 1 d . . . 
C384 C 0.2769 0.3246 2.0978 0.336 Uiso 1 1 d . . . 
C385 C 0.2148 0.3915 2.2504 0.160 Uiso 1 1 d . . . 
C387 C 0.2616 0.3530 2.1313 0.645 Uiso 1 1 d . . . 
C388 C 0.2361 0.4441 2.2072 0.153 Uiso 1 1 d . . . 
C396 C 0.0820 0.5206 2.0714 0.235 Uiso 1 1 d . . . 
C401 C -0.0218 0.1916 1.9018 0.182 Uiso 1 1 d . . . 
C403 C -0.3240 0.5398 2.5205 0.213 Uiso 1 1 d . . . 
C404 C -0.1513 -0.0891 2.0593 0.255 Uiso 1 1 d D . . 
C406 C -0.1914 -0.0594 2.0352 0.240 Uiso 1 1 d D . . 
C407 C -0.0375 0.9864 2.2091 0.164 Uiso 1 1 d . . . 
C408 C 0.0976 0.8989 2.1758 0.279 Uiso 1 1 d . . . 
C410 C 0.2009 0.3152 2.1102 0.198 Uiso 1 1 d . . . 
C411 C -0.1398 -0.0270 2.0709 0.146 Uiso 1 1 d D . . 
C412 C -0.2132 0.7465 2.5256 0.106 Uiso 1 1 d . . . 
C413 C 0.2254 0.3514 2.1155 0.413 Uiso 1 1 d . . . 
C414 C -0.3052 0.5242 2.4984 0.199 Uiso 1 1 d . . . 
C415 C -0.2396 0.6758 2.5130 0.170 Uiso 1 1 d . . . 
C416 C -0.2677 -0.0433 2.0732 0.283 Uiso 1 1 d . . . 
C417 C -0.0755 0.5802 2.0735 0.164 Uiso 1 1 d D . . 
C419 C -0.1301 -0.0572 2.0752 0.181 Uiso 1 1 d D . . 
C421 C -0.0310 0.1900 1.8651 0.226 Uiso 1 1 d . . . 
C425 C -0.1701 -0.0271 2.0511 0.233 Uiso 1 1 d D . . 
C428 C 0.1908 0.1230 2.2005 0.190 Uiso 1 1 d . . . 
C429 C -0.2555 0.8000 2.3718 0.191 Uiso 1 1 d . . . 
C430 C -0.1536 0.7058 2.5902 0.150 Uiso 1 1 d . . . 
C431 C -0.1091 0.6853 2.1035 0.183 Uiso 1 1 d . . . 
C433 C 0.0480 0.4889 2.0755 0.175 Uiso 1 1 d . . . 
C435 C -0.1158 0.1937 1.9040 0.127 Uiso 1 1 d . . . 
C436 C -0.2451 0.7279 2.5445 0.163 Uiso 1 1 d . . . 
C437 C -0.2598 0.5819 2.5459 0.309 Uiso 1 1 d . . . 
C440 C 0.1899 0.2660 2.2322 0.129 Uiso 1 1 d D . . 
C441 C -0.0558 0.6432 2.0639 0.184 Uiso 1 1 d D . . 
C442 C 0.2260 0.8804 2.3449 0.171 Uiso 1 1 d . . . 
C443 C 0.0835 0.8750 2.1978 0.096 Uiso 1 1 d . . . 
C444 C 0.0719 0.1255 1.9464 0.144 Uiso 1 1 d . . . 
C445 C -0.2126 0.7360 2.1736 0.127 Uiso 1 1 d . . . 
C447 C 0.0371 0.9062 2.1661 0.139 Uiso 1 1 d . . . 
C448 C 0.2236 0.1293 2.2273 0.141 Uiso 1 1 d . . . 
C449 C -0.1374 0.1721 1.8364 0.204 Uiso 1 1 d . . . 
C450 C -0.1629 0.6446 2.5886 0.139 Uiso 1 1 d . . . 
C451 C -0.2898 0.8080 2.3542 0.176 Uiso 1 1 d . . . 
C452 C -0.0865 0.2449 1.8648 0.141 Uiso 1 1 d . . . 
C453 C -0.2125 -0.0033 2.1292 0.128 Uiso 1 1 d . . . 
C454 C -0.2367 0.3558 2.0686 0.145 Uiso 1 1 d . . . 
C455 C -0.2450 0.6623 2.1710 0.101 Uiso 1 1 d . . . 
C456 C 0.0224 0.8817 2.1943 0.084 Uiso 1 1 d . . . 
C457 C 0.1329 0.5014 2.0957 0.212 Uiso 1 1 d . . . 
C458 C -0.1357 0.1704 1.8764 0.103 Uiso 1 1 d . . . 
C459 C -0.0581 0.5874 2.1041 0.113 Uiso 1 1 d D . . 
C460 C -0.0619 0.3926 1.9169 0.131 Uiso 1 1 d . . . 
C461 C -0.3096 0.7481 2.3191 0.211 Uiso 1 1 d . . . 
C462 C -0.3607 0.0490 2.1874 0.105 Uiso 1 1 d . . . 
C463 C -0.3318 0.1753 2.1402 0.085 Uiso 1 1 d . . . 
C464 C -0.2291 -0.0437 2.1289 0.142 Uiso 1 1 d . . . 
C465 C -0.2398 0.7167 2.1469 0.116 Uiso 1 1 d . . . 
C466 C -0.0897 0.2302 1.8999 0.116 Uiso 1 1 d . . . 
C467 C -0.0430 0.9563 2.2029 0.193 Uiso 1 1 d . . . 
C468 C 0.1397 0.8180 2.5089 0.024 Uiso 1 1 d . . . 
C469 C -0.1717 0.5006 2.3024 0.028 Uiso 1 1 d . . . 
C470 C -0.0369 0.9121 2.3817 0.031 Uiso 1 1 d . . . 
C471 C 0.0396 0.8964 2.3058 0.032 Uiso 1 1 d . . . 
C472 C 0.0670 0.7472 2.5697 0.021 Uiso 1 1 d . . . 
C473 C 0.0501 0.7230 2.5422 0.025 Uiso 1 1 d . . . 
C474 C 0.2039 0.6895 2.4173 0.029 Uiso 1 1 d . . . 
C475 C -0.1731 0.3601 2.1787 0.036 Uiso 1 1 d . . . 
C476 C -0.1177 0.0173 2.1827 0.030 Uiso 1 1 d . . . 
C477 C -0.1168 0.6832 2.5135 0.025 Uiso 1 1 d . . . 
C478 C -0.1991 0.1814 2.3122 0.028 Uiso 1 1 d . . . 
C479 C 0.0717 0.4414 2.3272 0.034 Uiso 1 1 d . . . 
C480 C 0.0925 0.5973 2.4142 0.023 Uiso 1 1 d . . . 
C481 C -0.1325 -0.0227 2.1899 0.038 Uiso 1 1 d . . . 
C482 C 0.0106 0.3935 2.1960 0.035 Uiso 1 1 d . . . 
C483 C 0.1137 0.8067 2.4791 0.022 Uiso 1 1 d . . . 
C484 C 0.1059 0.6566 2.2787 0.020 Uiso 1 1 d . . . 
C485 C 0.1101 0.5765 2.4363 0.036 Uiso 1 1 d . . . 
C486 C -0.0269 0.4984 2.4540 0.028 Uiso 1 1 d . . . 
C487 C 0.0191 0.4293 2.2098 0.028 Uiso 1 1 d . . . 
C488 C 0.0289 0.3789 2.3147 0.040 Uiso 1 1 d . . . 
C489 C 0.1932 0.8246 2.4137 0.026 Uiso 1 1 d . . . 
C490 C 0.1558 0.7944 2.5230 0.033 Uiso 1 1 d . . . 
C491 C 0.1807 0.7479 2.3070 0.026 Uiso 1 1 d . . . 
C492 C -0.0599 0.1922 2.3023 0.027 Uiso 1 1 d . . . 
C493 C 0.1373 0.6885 2.5169 0.021 Uiso 1 1 d . . . 
C494 C 0.1061 0.6775 2.4895 0.020 Uiso 1 1 d . . . 
C495 C -0.0304 0.7567 2.5596 0.023 Uiso 1 1 d . . . 
C496 C 0.0585 0.2495 2.3877 0.032 Uiso 1 1 d . . . 
C497 C -0.0385 0.7391 2.5921 0.028 Uiso 1 1 d . . . 
C498 C 0.0606 0.1485 2.3807 0.070 Uiso 1 1 d . . . 
C499 C -0.1650 0.7558 2.4856 0.079 Uiso 1 1 d . . . 
C500 C -0.0575 0.9388 2.2283 0.069 Uiso 1 1 d . . . 
C501 C 0.2322 0.7741 2.2305 0.047 Uiso 1 1 d . . . 
C502 C 0.0800 0.9819 2.4763 0.069 Uiso 1 1 d . . . 
C503 C -0.1926 0.3372 2.3479 0.100 Uiso 1 1 d . . . 
C504 C 0.1367 0.4510 2.2156 0.062 Uiso 1 1 d . . . 
C505 C 0.0194 0.1177 1.9786 0.078 Uiso 1 1 d . . . 
C506 C -0.0036 0.9712 2.4063 0.078 Uiso 1 1 d . . . 
C507 C -0.1107 0.4037 2.4236 0.062 Uiso 1 1 d . . . 
C508 C -0.1679 0.6193 2.1521 0.072 Uiso 1 1 d . . . 
C509 C -0.3197 0.0595 2.1939 0.054 Uiso 1 1 d . . . 
C510 C 0.1668 0.6522 2.2125 0.066 Uiso 1 1 d . . . 
C511 C -0.2052 0.3961 2.1556 0.057 Uiso 1 1 d . . . 
C512 C -0.2214 0.0183 2.1064 0.071 Uiso 1 1 d . . . 
C513 C 0.1354 0.6498 2.2278 0.039 Uiso 1 1 d . . . 
C514 C -0.1657 0.3205 2.3378 0.064 Uiso 1 1 d . . . 
C515 C 0.0754 0.9388 2.4350 0.045 Uiso 1 1 d . . . 
C516 C 0.1878 0.9156 2.3667 0.082 Uiso 1 1 d . . . 
C517 C -0.2179 0.6805 2.1964 0.054 Uiso 1 1 d . . . 
C518 C 0.2587 0.8625 2.4260 0.041 Uiso 1 1 d . . . 
C519 C -0.1047 0.0450 1.9974 0.070 Uiso 1 1 d . . . 
C520 C -0.2674 0.6405 2.4320 0.045 Uiso 1 1 d . . . 
C521 C 0.0300 0.4255 2.0966 0.043 Uiso 1 1 d . . . 
C522 C 0.0950 0.8069 2.5924 0.048 Uiso 1 1 d . . . 
C523 C 0.2220 0.6008 2.4313 0.064 Uiso 1 1 d . . . 
C524 C -0.0385 0.5181 2.1569 0.049 Uiso 1 1 d . . . 
C525 C -0.2302 0.5603 2.1963 0.056 Uiso 1 1 d . . . 
C526 C -0.3104 0.0924 2.1455 0.063 Uiso 1 1 d . . . 
C527 C 0.1698 0.1587 2.2379 0.072 Uiso 1 1 d . . . 
C528 C -0.2978 0.0808 2.1725 0.047 Uiso 1 1 d . . . 
C529 C -0.0216 0.9340 2.4103 0.062 Uiso 1 1 d . . . 
C530 C 0.1732 0.8630 2.5503 0.045 Uiso 1 1 d . . . 
C531 C -0.0459 0.3378 1.9404 0.057 Uiso 1 1 d . . . 
C532 C 0.0926 1.0012 2.4246 0.077 Uiso 1 1 d . . . 
C533 C -0.0186 0.1715 2.3801 0.050 Uiso 1 1 d . . . 
C534 C -0.1936 0.3552 2.2043 0.046 Uiso 1 1 d . . . 
C535 C -0.2974 0.1961 2.1524 0.051 Uiso 1 1 d . . . 
C536 C -0.1505 0.5679 2.1344 0.065 Uiso 1 1 d . . . 
C537 C -0.0379 0.0571 2.3207 0.057 Uiso 1 1 d . . . 
C538 C -0.2006 0.4509 2.2652 0.052 Uiso 1 1 d . . . 
C539 C -0.0210 0.6334 2.1485 0.055 Uiso 1 1 d D . . 
C540 C 0.1541 0.8594 2.3454 0.069 Uiso 1 1 d . . . 
C541 C 0.2430 0.6370 2.4769 0.057 Uiso 1 1 d . . . 
C542 C 0.1436 0.2489 2.2131 0.051 Uiso 1 1 d D . . 
C543 C -0.1380 0.7108 2.5598 0.061 Uiso 1 1 d . . . 
C544 C 0.2740 0.7638 2.2687 0.056 Uiso 1 1 d . . . 
C545 C -0.0835 0.7126 2.1988 0.041 Uiso 1 1 d . . . 
C546 C 0.1701 0.1474 2.2070 0.063 Uiso 1 1 d . . . 
C547 C -0.2239 0.3118 2.0951 0.053 Uiso 1 1 d . . . 
C548 C 0.0029 0.1209 2.0098 0.042 Uiso 1 1 d . . . 
C549 C -0.1136 0.4789 2.1473 0.055 Uiso 1 1 d . . . 
C550 C 0.0763 0.4772 2.3393 0.051 Uiso 1 1 d . . . 
C551 C -0.2413 0.5296 2.1725 0.065 Uiso 1 1 d . . . 
C552 C -0.0858 0.4681 2.1323 0.047 Uiso 1 1 d . . . 
C553 C -0.0515 0.4870 2.1370 0.042 Uiso 1 1 d . . . 
C554 C -0.1440 -0.0849 2.1788 0.068 Uiso 1 1 d . . . 
C555 C 0.1575 0.4465 2.2705 0.048 Uiso 1 1 d . . . 
C556 C -0.1480 0.5948 2.1575 0.041 Uiso 1 1 d . . . 
C557 C 0.2474 0.7569 2.2918 0.041 Uiso 1 1 d . . . 
C558 C 0.1430 0.1529 2.1813 0.065 Uiso 1 1 d . . . 
C559 C 0.2063 0.6666 2.2584 0.047 Uiso 1 1 d . . . 
C560 C 0.0505 0.1501 2.3461 0.061 Uiso 1 1 d . . . 
C562 C -0.1976 0.2890 2.0994 0.042 Uiso 1 1 d . . . 
C563 C 0.0738 0.1796 2.3300 0.049 Uiso 1 1 d . . . 
C564 C -0.1898 0.5870 2.2447 0.033 Uiso 1 1 d . . . 
C565 C 0.0092 0.4244 2.3422 0.049 Uiso 1 1 d . . . 
C566 C 0.2854 0.8969 2.4369 0.040 Uiso 1 1 d . . . 
C567 C -0.1311 -0.0492 2.1695 0.051 Uiso 1 1 d . . . 
C568 C 0.1469 0.5701 2.4818 0.044 Uiso 1 1 d . . . 
C569 C -0.2032 0.5580 2.2192 0.043 Uiso 1 1 d . . . 
C570 C 0.2380 0.9180 2.4513 0.050 Uiso 1 1 d . . . 
C571 C -0.1781 0.8622 2.3307 0.045 Uiso 1 1 d . . . 
C572 C -0.1872 0.5295 2.2196 0.047 Uiso 1 1 d . . . 
C573 C 0.0362 0.8364 2.2329 0.043 Uiso 1 1 d . . . 
C574 C -0.0695 0.4570 2.2329 0.055 Uiso 1 1 d . . . 
C575 C 0.1582 0.6960 2.5717 0.048 Uiso 1 1 d . . . 
C576 C 0.0336 0.3014 2.3684 0.042 Uiso 1 1 d . . . 
C577 C -0.1678 0.4781 2.2788 0.039 Uiso 1 1 d . . . 
C578 C -0.1591 0.3501 2.2870 0.061 Uiso 1 1 d . . . 
C579 C -0.1758 0.3804 2.1538 0.046 Uiso 1 1 d . . . 
C580 C -0.0484 0.3526 1.9980 0.033 Uiso 1 1 d . . . 
C581 C 0.0765 0.9605 2.3184 0.037 Uiso 1 1 d . . . 
C582 C -0.0573 0.0772 2.2664 0.032 Uiso 1 1 d . . . 
C583 C -0.0408 0.4503 2.4902 0.062 Uiso 1 1 d . . . 
C584 C 0.0155 0.4605 2.3549 0.063 Uiso 1 1 d . . . 
C585 C -0.1717 0.2679 1.9934 0.064 Uiso 1 1 d . . . 
C586 C -0.1117 0.5789 2.5526 0.044 Uiso 1 1 d . . . 
C587 C -0.0982 0.5099 2.1677 0.046 Uiso 1 1 d . . . 
C588 C -0.0665 0.0569 2.2968 0.033 Uiso 1 1 d . . . 
C589 C 0.1345 0.4306 2.2433 0.036 Uiso 1 1 d . . . 
C590 C 0.1075 0.3928 2.2434 0.036 Uiso 1 1 d . . . 
C591 C 0.0991 0.5377 2.4305 0.048 Uiso 1 1 d . . . 
C592 C 0.1836 0.4808 2.2678 0.061 Uiso 1 1 d . . . 
C593 C -0.0247 0.1915 2.3538 0.036 Uiso 1 1 d . . . 
C594 C 0.2104 0.7595 2.2836 0.034 Uiso 1 1 d . . . 
C595 C -0.1256 0.3066 2.2987 0.033 Uiso 1 1 d . . . 
C596 C -0.2045 0.0597 2.1079 0.041 Uiso 1 1 d . . . 
C597 C 0.2099 0.6293 2.4171 0.049 Uiso 1 1 d . . . 
C598 C 0.0729 0.7347 2.5999 0.039 Uiso 1 1 d . . . 
C599 C -0.2294 0.6530 2.4183 0.030 Uiso 1 1 d . . . 
C600 C 0.0317 0.4698 2.2557 0.049 Uiso 1 1 d . . . 
C601 C -0.1058 0.0386 2.3017 0.053 Uiso 1 1 d . . . 
C602 C -0.1563 0.8383 2.3196 0.040 Uiso 1 1 d . . . 
C603 C -0.2332 0.1618 2.3246 0.047 Uiso 1 1 d . . . 
C604 C -0.0112 0.4786 2.4345 0.044 Uiso 1 1 d . . . 
C605 C -0.0272 0.5339 2.4440 0.047 Uiso 1 1 d . . . 
C606 C -0.0442 0.4827 2.4815 0.052 Uiso 1 1 d . . . 
C607 C 0.1753 0.6663 2.2769 0.046 Uiso 1 1 d . . . 
C608 C -0.0804 0.6024 2.5710 0.049 Uiso 1 1 d . . . 
C609 C -0.0607 0.4734 2.2643 0.033 Uiso 1 1 d . . . 
C610 C -0.1517 0.3267 2.3084 0.031 Uiso 1 1 d . . . 
C611 C 0.0900 0.7596 2.6245 0.044 Uiso 1 1 d . . . 
C612 C -0.0660 0.4175 2.2873 0.049 Uiso 1 1 d . . . 
C613 C 0.0775 0.7845 2.5658 0.034 Uiso 1 1 d . . . 
C614 C -0.1845 0.1675 2.2826 0.029 Uiso 1 1 d . . . 
C615 C -0.1362 0.5300 2.3161 0.029 Uiso 1 1 d . . . 
C616 C -0.0630 0.1202 2.3644 0.033 Uiso 1 1 d . . . 
C617 C 0.2156 0.6607 2.4334 0.041 Uiso 1 1 d . . . 
C618 C -0.2311 0.5801 2.3372 0.033 Uiso 1 1 d . . . 
C619 C -0.1179 0.6022 2.1842 0.037 Uiso 1 1 d . . . 
C620 C -0.0724 0.1360 2.3351 0.036 Uiso 1 1 d . . . 
C621 C 0.2318 0.6653 2.4652 0.042 Uiso 1 1 d . . . 
C622 C -0.1880 0.2252 2.3542 0.044 Uiso 1 1 d . . . 
C623 C -0.1755 0.2136 2.3266 0.042 Uiso 1 1 d . . . 
C624 C 0.0646 0.8987 2.4229 0.040 Uiso 1 1 d . . . 
C625 C -0.0521 0.1722 2.3307 0.020 Uiso 1 1 d . . . 
C626 C 0.1392 0.6564 2.2607 0.035 Uiso 1 1 d . . . 
C627 C 0.0476 0.9356 2.3017 0.036 Uiso 1 1 d . . . 
C628 C 0.0362 0.4151 2.3293 0.035 Uiso 1 1 d . . . 
C629 C 0.1899 0.8875 2.3509 0.044 Uiso 1 1 d . . . 
C630 C 0.2020 0.7141 2.5327 0.041 Uiso 1 1 d . . . 
C631 C 0.0240 0.4584 2.1911 0.042 Uiso 1 1 d . . . 
C632 C 0.1739 0.7040 2.5076 0.033 Uiso 1 1 d . . . 
C633 C 0.0667 0.2668 2.3582 0.035 Uiso 1 1 d . . . 
C634 C 0.0225 0.4343 2.2435 0.040 Uiso 1 1 d . . . 
C635 C -0.2436 0.1791 2.3499 0.043 Uiso 1 1 d . . . 
C636 C 0.1485 0.8515 2.5222 0.038 Uiso 1 1 d . . . 
C637 C -0.2545 0.0957 2.1804 0.033 Uiso 1 1 d . . . 
C638 C 0.1287 0.6858 2.5470 0.030 Uiso 1 1 d . . . 
N139 N 0.1393 0.5345 2.4764 0.026 Uiso 1 1 d . . . 
C640 C -0.1205 0.4950 2.4104 0.037 Uiso 1 1 d . . . 
C641 C -0.0578 0.8715 2.3849 0.031 Uiso 1 1 d . . . 
C642 C -0.0516 0.5150 2.2660 0.031 Uiso 1 1 d . . . 
C643 C -0.0100 0.4466 2.4455 0.053 Uiso 1 1 d . . . 
C644 C -0.1091 0.5808 2.5157 0.029 Uiso 1 1 d . . . 
C645 C 0.1794 0.8079 2.5522 0.040 Uiso 1 1 d . . . 
C646 C 0.1346 0.5920 2.4617 0.032 Uiso 1 1 d . . . 
C647 C -0.1433 0.3400 2.1781 0.031 Uiso 1 1 d . . . 
C648 C 0.2101 0.8851 2.4391 0.030 Uiso 1 1 d . . . 
C649 C -0.1176 0.4592 2.4041 0.035 Uiso 1 1 d . . . 
C650 C -0.1380 0.6805 2.5431 0.042 Uiso 1 1 d . . . 
C651 C -0.0582 0.4549 2.2903 0.037 Uiso 1 1 d . . . 
C652 C -0.1381 0.2570 2.0043 0.035 Uiso 1 1 d . . . 
C653 C -0.0522 0.3591 1.9627 0.042 Uiso 1 1 d . . . 
C654 C 0.2221 0.8584 2.4259 0.026 Uiso 1 1 d . . . 
C655 C -0.1166 0.4373 2.4294 0.032 Uiso 1 1 d . . . 
C656 C 0.0253 0.2878 2.3981 0.043 Uiso 1 1 d . . . 
C657 C -0.1093 0.0075 2.0888 0.091 Uiso 1 1 d . . . 
C658 C -0.1124 0.1833 1.9434 0.101 Uiso 1 1 d . . . 
C659 C -0.2073 0.6942 2.4939 0.109 Uiso 1 1 d . . . 
C660 C -0.3237 0.6516 2.4445 0.138 Uiso 1 1 d . . . 
C661 C -0.0679 0.9389 2.2639 0.312 Uiso 1 1 d . . . 
C662 C -0.1730 0.5635 2.1068 0.115 Uiso 1 1 d . . . 
C663 C -0.2800 0.3236 2.1034 0.128 Uiso 1 1 d . . . 
C664 C -0.0051 0.2255 1.9145 0.115 Uiso 1 1 d . . . 
C665 C -0.2451 0.0019 2.0775 0.131 Uiso 1 1 d . . . 
C666 C -0.0856 -0.0482 1.9900 0.186 Uiso 1 1 d . . . 
C667 C -0.2660 0.5466 2.4969 0.095 Uiso 1 1 d . . . 
C668 C -0.2029 0.2400 1.9795 0.083 Uiso 1 1 d . . . 
C669 C -0.2577 0.2999 2.1098 0.076 Uiso 1 1 d . . . 
C670 C -0.2068 0.3086 1.9893 0.084 Uiso 1 1 d . . . 
C671 C -0.2105 0.9034 2.3205 0.111 Uiso 1 1 d . . . 
C672 C -0.2353 0.2527 1.9710 0.082 Uiso 1 1 d . . . 
C673 C 0.0328 0.9833 2.2766 0.076 Uiso 1 1 d . . . 
C674 C -0.2930 0.2165 2.1793 0.066 Uiso 1 1 d . . . 
C675 C -0.3518 0.0830 2.1393 0.112 Uiso 1 1 d . . . 
C676 C -0.2876 0.6640 2.4311 0.077 Uiso 1 1 d . . . 
C677 C -0.1337 -0.0491 1.9542 0.157 Uiso 1 1 d . . . 
C678 C -0.1432 0.5648 2.6010 0.082 Uiso 1 1 d . . . 
C679 C 0.1637 0.4858 2.2168 0.079 Uiso 1 1 d . . . 
C681 C -0.0995 0.7087 2.1645 0.076 Uiso 1 1 d . . . 
C682 C -0.0380 0.6504 2.0942 0.112 Uiso 1 1 d D . . 
C683 C 0.0574 0.1235 1.9782 0.095 Uiso 1 1 d . . . 
C684 C -0.0815 -0.0100 2.0029 0.137 Uiso 1 1 d . . . 
C685 C -0.1741 0.3012 1.9987 0.081 Uiso 1 1 d . . . 
C686 C -0.0037 0.2328 1.9565 0.093 Uiso 1 1 d . . . 
C687 C 0.0970 0.2425 2.0088 0.097 Uiso 1 1 d . . . 
C688 C 0.0862 0.9658 2.4123 0.081 Uiso 1 1 d . . . 
C689 C -0.0933 0.6870 2.1403 0.090 Uiso 1 1 d . . . 
C690 C -0.3224 0.5022 2.3207 0.097 Uiso 1 1 d . . . 
C691 C -0.2367 0.4696 2.3006 0.071 Uiso 1 1 d . . . 
C692 C -0.1435 0.5600 2.5663 0.061 Uiso 1 1 d . . . 
C693 C 0.1986 0.1560 2.2624 0.096 Uiso 1 1 d . . . 
C694 C -0.3286 0.2176 2.1926 0.094 Uiso 1 1 d . . . 
C695 C -0.2835 0.6084 2.4404 0.071 Uiso 1 1 d . . . 
C696 C -0.2529 0.7650 2.3623 0.074 Uiso 1 1 d . . . 
C697 C -0.1912 0.8819 2.3099 0.068 Uiso 1 1 d . . . 
C698 C -0.3124 0.5202 2.3786 0.125 Uiso 1 1 d . . . 
C699 C -0.1350 -0.0118 1.9630 0.114 Uiso 1 1 d . . . 
C700 C -0.1978 0.8913 2.3740 0.114 Uiso 1 1 d . . . 
C701 C -0.1832 0.8641 2.3603 0.090 Uiso 1 1 d . . . 
C702 C -0.0830 0.6061 2.6043 0.069 Uiso 1 1 d . . . 
C703 C -0.2467 0.5699 2.5171 0.113 Uiso 1 1 d . . . 
C704 C -0.2027 0.7167 2.1970 0.047 Uiso 1 1 d . . . 
C705 C -0.2621 0.1931 2.1364 0.060 Uiso 1 1 d . . . 
C706 C -0.0639 0.3859 1.9516 0.096 Uiso 1 1 d . . . 
C707 C -0.1701 0.7376 2.2215 0.049 Uiso 1 1 d . . . 
C708 C 0.1168 0.1978 2.3786 0.075 Uiso 1 1 d . . . 
C709 C -0.0122 0.9650 2.3511 0.081 Uiso 1 1 d . . . 
C710 C -0.1849 0.3667 2.2988 0.082 Uiso 1 1 d . . . 
C711 C -0.2500 0.5337 2.4682 0.064 Uiso 1 1 d . . . 
C712 C 0.0956 0.4663 2.1026 0.112 Uiso 1 1 d . . . 
C713 C 0.0482 0.8670 2.2076 0.068 Uiso 1 1 d . . . 
C714 C 0.2044 0.7697 2.2535 0.058 Uiso 1 1 d . . . 
C715 C 0.0604 0.4609 2.0930 0.080 Uiso 1 1 d . . . 
C716 C -0.3663 0.1738 2.1564 0.063 Uiso 1 1 d . . . 
C717 C 0.0608 0.1862 2.2964 0.055 Uiso 1 1 d . . . 
C718 C -0.1526 0.6457 2.5576 0.101 Uiso 1 1 d . . . 
C719 C -0.1961 0.6100 2.1262 0.080 Uiso 1 1 d . . . 
C720 C -0.3208 0.5949 2.4542 0.076 Uiso 1 1 d . . . 
C721 C -0.0398 0.6223 2.1140 0.064 Uiso 1 1 d D . . 
C722 C -0.1572 -0.0682 2.2304 0.083 Uiso 1 1 d . . . 
C723 C -0.1084 0.0053 1.9865 0.079 Uiso 1 1 d . . . 
C724 C -0.2192 0.7559 2.3770 0.072 Uiso 1 1 d . . . 
C726 C -0.2656 0.5519 2.3417 0.049 Uiso 1 1 d . . . 
C727 C -0.0326 0.9287 2.3535 0.075 Uiso 1 1 d . . . 
C728 C 0.2192 0.9491 2.3784 0.096 Uiso 1 1 d . . . 
C729 C 0.2534 0.9148 2.3578 0.083 Uiso 1 1 d . . . 
C730 C -0.1991 0.5038 2.1949 0.062 Uiso 1 1 d . . . 
C731 C -0.0462 0.3452 1.9080 0.083 Uiso 1 1 d . . . 
C732 C -0.2125 0.3395 2.0747 0.063 Uiso 1 1 d . . . 
C733 C -0.1138 0.4139 2.3686 0.064 Uiso 1 1 d . . . 
C734 C -0.0998 0.4366 2.1091 0.058 Uiso 1 1 d . . . 
C735 C 0.0727 0.9445 2.4662 0.058 Uiso 1 1 d . . . 
C736 C 0.0347 0.4935 2.2074 0.073 Uiso 1 1 d . . . 
C737 C -0.1987 0.7317 2.5024 0.082 Uiso 1 1 d . . . 
C738 C 0.0854 0.9978 2.3168 0.074 Uiso 1 1 d . . . 
C739 C -0.1475 -0.0315 2.2200 0.065 Uiso 1 1 d . . . 
C740 C 0.0254 0.9450 2.2794 0.066 Uiso 1 1 d . . . 
C741 C -0.2785 0.7430 2.3403 0.063 Uiso 1 1 d . . . 
C742 C -0.1160 0.0196 2.3278 0.079 Uiso 1 1 d . . . 
C743 C -0.2072 0.4978 2.3130 0.050 Uiso 1 1 d . . . 
C744 C -0.2779 0.5470 2.3731 0.054 Uiso 1 1 d . . . 
C745 C -0.0508 0.0385 2.3486 0.073 Uiso 1 1 d . . . 
C746 C -0.2879 0.5332 2.3164 0.062 Uiso 1 1 d . . . 
C747 C 0.1059 0.2034 2.3466 0.050 Uiso 1 1 d . . . 
C748 C -0.0689 0.8953 2.2272 0.069 Uiso 1 1 d . . . 
C749 C -0.1169 0.4476 2.3735 0.071 Uiso 1 1 d . . . 
C750 C -0.2208 0.3725 2.2057 0.043 Uiso 1 1 d . . . 
C751 C 0.1551 0.3025 2.1029 0.188 Uiso 1 1 d . . . 
C752 C 0.1374 0.5729 1.2812 0.057 Uiso 1 1 d . . . 
C753 C 0.1691 0.5644 1.2932 0.059 Uiso 1 1 d . . . 
C754 C 0.1759 0.5640 1.3256 0.055 Uiso 1 1 d . . . 
C755 C 0.1500 0.5701 1.3469 0.069 Uiso 1 1 d . . . 
C756 C 0.1194 0.5767 1.3317 0.067 Uiso 1 1 d . . . 
C757 C 0.2097 0.5563 1.3394 0.066 Uiso 1 1 d . . . 
C758 C 0.3757 0.9264 0.6631 0.043 Uiso 1 1 d . . . 
C759 C 0.3456 0.9336 0.6497 0.051 Uiso 1 1 d . . . 
C760 C 0.3189 0.9414 0.6688 0.034 Uiso 1 1 d . . . 
C761 C 0.3259 0.9407 0.7011 0.048 Uiso 1 1 d . . . 
C762 C 0.3589 0.9349 0.7136 0.063 Uiso 1 1 d . . . 
C763 C 0.2852 0.9490 0.6558 0.052 Uiso 1 1 d . . . 
C764 C 0.3023 0.2691 3.0110 2.000 Uiso 1 1 d D . . 
C827 C -0.0751 0.4197 2.2302 0.061 Uiso 1 1 d . . . 
N2 N 0.2847 0.3995 2.3421 0.476 Uiso 1 1 d D . . 
N3 N 0.6674 0.5958 2.9537 0.315 Uiso 1 1 d D . . 
N4 N 0.2674 0.1996 2.1407 0.171 Uiso 1 1 d . . . 
N5 N 0.8500 0.2899 2.8538 0.215 Uiso 1 1 d D . . 
N6 N 0.7028 0.1405 2.6838 0.129 Uiso 1 1 d . . . 
N7 N 0.3578 -0.0119 2.9171 0.216 Uiso 1 1 d . . . 
N8 N 0.1780 -0.0089 2.3184 0.220 Uiso 1 1 d D . . 
N9 N 0.4800 0.4860 2.1793 0.122 Uiso 1 1 d . . . 
N10 N 0.7507 0.5538 2.9015 0.282 Uiso 1 1 d . . . 
N11 N 0.4460 0.1217 2.0546 0.146 Uiso 1 1 d D . . 
N12 N 0.3910 0.2083 2.0995 0.157 Uiso 1 1 d . . . 
N13 N 0.2109 0.1598 2.8809 0.138 Uiso 1 1 d . . . 
N14 N 0.4315 0.3558 3.0767 0.154 Uiso 1 1 d . . . 
N15 N 0.2488 0.1817 2.5297 0.147 Uiso 1 1 d . . . 
N16O N 0.1131 0.5786 1.3007 0.061 Uiso 1 1 d . . . 
N16 N 0.5224 0.3108 3.1430 0.189 Uiso 1 1 d D . . 
N17 N 0.7573 0.1489 2.9228 0.110 Uiso 1 1 d . . . 
N18 N 0.1924 0.0594 2.5376 0.124 Uiso 1 1 d . . . 
N19 N 0.4619 0.5472 2.9083 0.118 Uiso 1 1 d . . . 
N20 N 0.5040 0.4856 2.3783 0.085 Uiso 1 1 d . . . 
N21 N 0.1634 0.1167 2.4478 0.082 Uiso 1 1 d . . . 
N22 N 0.2355 0.1937 2.7755 0.074 Uiso 1 1 d . . . 
N23 N 0.4495 0.0163 2.6511 0.052 Uiso 1 1 d . . . 
N24 N 0.4757 -0.0679 2.4708 0.052 Uiso 1 1 d . . . 
N25 N 0.7345 0.1030 2.4661 0.036 Uiso 1 1 d . . . 
N26 N 0.4284 -0.0988 2.2551 0.041 Uiso 1 1 d . . . 
N27 N 0.7223 0.2889 2.6421 0.050 Uiso 1 1 d . . . 
N28 N 0.5994 0.2875 2.6207 0.049 Uiso 1 1 d . . . 
N29 N 0.6917 0.2086 2.5674 0.040 Uiso 1 1 d . . . 
N30 N 0.4604 0.0041 2.7633 0.035 Uiso 1 1 d . . . 
N31 N 0.8727 0.4204 2.8418 0.083 Uiso 1 1 d . . . 
N32 N 0.5970 0.5073 2.4560 0.099 Uiso 1 1 d . . . 
N33 N 0.6046 0.2695 3.1560 0.074 Uiso 1 1 d . . . 
N34 N 0.3768 0.0660 2.6095 0.086 Uiso 1 1 d . . . 
N35 N 0.2841 0.0035 2.1683 0.122 Uiso 1 1 d . . . 
N36 N 0.2772 -0.0554 2.2684 0.088 Uiso 1 1 d . . . 
N37 N 0.6548 0.5917 2.7907 0.068 Uiso 1 1 d . . . 
N38 N 0.7196 0.2130 3.0341 0.064 Uiso 1 1 d . . . 
N39 N 0.6120 0.5654 3.0306 0.057 Uiso 1 1 d . . . 
N40 N 0.2553 0.0781 2.7547 0.072 Uiso 1 1 d . . . 
N41 N 0.3454 0.1692 2.6030 0.075 Uiso 1 1 d . . . 
N42 N 0.3059 0.0048 2.7550 0.064 Uiso 1 1 d . . . 
N43 N 0.7040 0.1492 2.2332 0.065 Uiso 1 1 d . . . 
N44 N 0.6839 0.3347 2.5696 0.071 Uiso 1 1 d . . . 
N45 N 0.3951 -0.1067 2.3919 0.072 Uiso 1 1 d . . . 
N46 N 0.5437 0.3618 2.6153 0.092 Uiso 1 1 d . . . 
N47 N 0.4149 0.3344 2.5998 0.062 Uiso 1 1 d . . . 
N48 N 0.7722 0.2750 2.2451 0.039 Uiso 1 1 d . . . 
N49 N 0.7539 0.4494 2.3800 0.058 Uiso 1 1 d . . . 
N50 N 0.5580 0.5103 2.3017 0.070 Uiso 1 1 d . . . 
N51 N 0.7769 0.4229 2.4543 0.056 Uiso 1 1 d . . . 
N52 N 0.6392 0.0373 2.4836 0.042 Uiso 1 1 d . . . 
N53 N 0.3753 0.4760 2.7734 0.101 Uiso 1 1 d . . . 
N54 N 0.7162 0.1056 2.8301 0.111 Uiso 1 1 d D . . 
N55 N 0.5980 0.4320 2.1731 0.087 Uiso 1 1 d . . . 
N56 N 0.5896 0.4796 2.6474 0.095 Uiso 1 1 d . . . 
N57 N 0.3150 0.0876 2.0977 0.113 Uiso 1 1 d . . . 
N58 N 0.5681 0.1256 3.0978 0.090 Uiso 1 1 d . . . 
N59 N 0.2809 0.3630 2.7388 0.071 Uiso 1 1 d . . . 
N60 N 0.4893 0.2304 2.2680 0.054 Uiso 1 1 d . . . 
N61 N 0.5348 0.2295 2.4422 0.040 Uiso 1 1 d . . . 
N62 N 0.5641 0.2846 2.3279 0.048 Uiso 1 1 d . . . 
N63 N 0.3595 0.2022 2.3347 0.047 Uiso 1 1 d . . . 
N64 N 0.3959 0.1241 2.3213 0.043 Uiso 1 1 d . . . 
N65 N 0.5112 0.3768 2.8338 0.046 Uiso 1 1 d . . . 
N66 N 0.5385 0.2017 2.8146 0.040 Uiso 1 1 d . . . 
N67 N 0.4283 0.2415 2.8351 0.043 Uiso 1 1 d . . . 
N68 N 0.4474 0.0318 2.1708 0.035 Uiso 1 1 d . . . 
N69 N 0.6363 0.2731 2.8371 0.037 Uiso 1 1 d . . . 
N70 N 0.3942 0.2067 2.4252 0.057 Uiso 1 1 d . . . 
N71 N 0.4913 0.3169 2.3712 0.053 Uiso 1 1 d . . . 
N72 N 0.5372 0.1431 2.3393 0.033 Uiso 1 1 d . . . 
N73 N 0.4603 0.2118 2.9171 0.041 Uiso 1 1 d . . . 
N74 N 0.4995 0.3098 2.9455 0.036 Uiso 1 1 d . . . 
N75 N 0.5315 0.3191 2.7689 0.046 Uiso 1 1 d . . . 
N76 N 0.6108 0.2713 2.9267 0.038 Uiso 1 1 d . . . 
N77 N 0.6050 0.3905 2.8818 0.038 Uiso 1 1 d . . . 
N78 N 0.4905 0.1292 2.4223 0.040 Uiso 1 1 d . . . 
N79 N 0.4453 0.2110 2.6502 0.042 Uiso 1 1 d . . . 
N80 N 0.2788 0.3361 2.1313 0.424 Uiso 1 1 d . . . 
N81 N 0.2370 0.4226 2.2391 0.204 Uiso 1 1 d . . . 
N83 N -0.1813 -0.0892 2.0395 0.232 Uiso 1 1 d D . . 
N84 N 0.1131 0.5247 2.0863 0.172 Uiso 1 1 d . . . 
N86 N -0.0775 0.6086 2.0554 0.175 Uiso 1 1 d D . . 
N89 N -0.1120 0.2143 1.8447 0.122 Uiso 1 1 d . . . 
N91 N -0.2544 -0.0563 2.1038 0.176 Uiso 1 1 d . . . 
N92 N 0.0707 0.9132 2.1602 0.139 Uiso 1 1 d . . . 
N93 N -0.1667 0.6744 2.6022 0.143 Uiso 1 1 d . . . 
N94 N -0.2562 0.6885 2.5339 0.160 Uiso 1 1 d . . . 
N97 N -0.3036 0.5623 2.5455 0.164 Uiso 1 1 d . . . 
N99 N -0.2515 0.6828 2.1472 0.092 Uiso 1 1 d . . . 
N100 N -0.3139 0.7826 2.3341 0.100 Uiso 1 1 d . . . 
N101 N 0.0486 0.4850 2.3501 0.051 Uiso 1 1 d . . . 
N102 N -0.0763 0.4010 2.2592 0.052 Uiso 1 1 d . . . 
N103 N 0.0365 0.4972 2.2378 0.052 Uiso 1 1 d . . . 
N104 N 0.0919 0.1708 2.3967 0.078 Uiso 1 1 d . . . 
N105 N 0.1940 0.7103 2.5632 0.047 Uiso 1 1 d . . . 
N106 N -0.2203 0.2086 2.3646 0.048 Uiso 1 1 d . . . 
N107 N -0.0368 0.1392 2.3844 0.051 Uiso 1 1 d . . . 
N108 N 0.1011 0.7946 2.6205 0.041 Uiso 1 1 d . . . 
N109 N -0.1574 -0.0932 2.2069 0.065 Uiso 1 1 d . . . 
N110 N -0.0892 0.0174 2.3521 0.088 Uiso 1 1 d . . . 
N111 N -0.2252 0.3929 2.1816 0.066 Uiso 1 1 d . . . 
N112 N -0.2371 0.2826 1.9755 0.087 Uiso 1 1 d . . . 
N113 N -0.3612 0.1961 2.1822 0.092 Uiso 1 1 d . . . 
N114 N -0.0246 0.4313 2.4720 0.064 Uiso 1 1 d . . . 
N115 N -0.3392 0.6177 2.4545 0.118 Uiso 1 1 d . . . 
N116 N -0.1085 0.3934 2.3941 0.066 Uiso 1 1 d . . . 
N117 N 0.2571 0.9444 2.3711 0.101 Uiso 1 1 d . . . 
N118 N -0.2340 0.4488 2.2775 0.068 Uiso 1 1 d . . . 
N119 N 0.0611 1.0085 2.2945 0.077 Uiso 1 1 d . . . 
N120 N -0.2261 0.5038 2.1722 0.070 Uiso 1 1 d . . . 
N121 N 0.2379 0.6066 2.4600 0.057 Uiso 1 1 d . . . 
N122 N -0.0575 0.3714 1.8977 0.072 Uiso 1 1 d . . . 
N123 N 0.0014 0.9850 2.3774 0.052 Uiso 1 1 d . . . 
N124 N 0.2766 0.9232 2.4477 0.053 Uiso 1 1 d . . . 
N125 N 0.0903 1.0090 2.4555 0.079 Uiso 1 1 d . . . 
N126 N 0.1857 0.5009 2.2424 0.060 Uiso 1 1 d . . . 
N127 N 0.2019 0.6619 2.2270 0.055 Uiso 1 1 d . . . 
N128 N 0.2666 0.7725 2.2399 0.058 Uiso 1 1 d . . . 
N129 N 0.1857 0.8393 2.5642 0.040 Uiso 1 1 d . . . 
N130 N -0.3763 0.0613 2.1635 0.125 Uiso 1 1 d . . . 
N131 N 0.2248 0.1429 2.2533 0.083 Uiso 1 1 d . . . 
N132 N -0.2693 0.3486 2.0785 0.127 Uiso 1 1 d . . . 
N133 N -0.3330 0.5010 2.3499 0.109 Uiso 1 1 d . . . 
N134 N -0.1151 -0.0650 1.9688 0.113 Uiso 1 1 d . . . 
N135 N -0.2021 0.3585 2.3278 0.080 Uiso 1 1 d . . . 
N136 N -0.2013 0.5820 2.1047 0.090 Uiso 1 1 d . . . 
N137 N -0.1143 0.5892 2.6168 0.090 Uiso 1 1 d . . . 
N138 N -0.2145 0.9089 2.3511 0.071 Uiso 1 1 d . . . 
C639 C 0.1161 0.5193 2.4528 0.117 Uiso 1 1 d . . . 
N140 N -0.1446 0.7015 2.3412 0.035 Uiso 1 1 d . . . 
N141 N -0.0145 0.1232 2.1645 0.051 Uiso 1 1 d . . . 
N142 N -0.0322 0.1836 2.2305 0.045 Uiso 1 1 d . . . 
N143 N 0.0301 0.2885 2.0815 0.052 Uiso 1 1 d . . . 
N144 N -0.1232 0.2267 2.0759 0.063 Uiso 1 1 d . . . 
N145 N -0.1049 0.7065 2.4299 0.040 Uiso 1 1 d . . . 
N146 N 0.0585 0.7837 2.3289 0.049 Uiso 1 1 d . . . 
N147 N -0.1084 0.6239 2.3271 0.050 Uiso 1 1 d . . . 
N148 N -0.0074 0.1894 2.0512 0.053 Uiso 1 1 d . . . 
N149 N -0.1406 0.2255 2.1656 0.056 Uiso 1 1 d . . . 
N150 N -0.0444 0.2977 2.1841 0.039 Uiso 1 1 d . . . 
N151 N 0.0693 0.2644 2.1618 0.049 Uiso 1 1 d . . . 
N152 N -0.0629 0.5278 2.1738 0.040 Uiso 1 1 d . . . 
N153 N -0.0160 0.8137 2.3725 0.039 Uiso 1 1 d . . . 
N154 N -0.0214 0.7280 2.2701 0.033 Uiso 1 1 d . . . 
N155 N -0.1096 0.1099 2.1201 0.051 Uiso 1 1 d . . . 
N156 N 0.0345 0.7297 2.4432 0.030 Uiso 1 1 d . . . 
N157 N 0.0540 0.2918 2.3479 0.025 Uiso 1 1 d . . . 
N158 N 0.0335 0.6416 2.3379 0.039 Uiso 1 1 d . . . 
N159 N -0.0095 0.6303 2.4241 0.048 Uiso 1 1 d . . . 
N161 N 0.3031 0.2598 3.0424 0.478 Uiso 1 1 d D . . 
N162 N 0.3830 0.9266 0.6958 0.046 Uiso 1 1 d . . . 
C48 C 0.8243 0.2752 2.8323 0.121 Uiso 1 1 d D . . 
C392 C 0.1590 0.3698 2.1752 0.227 Uiso 1 1 d D . . 
C434 C 0.1975 0.3964 2.1938 0.214 Uiso 1 1 d D . . 
C418 C 0.2034 0.4365 2.1755 0.181 Uiso 1 1 d . . . 
C423 C -0.0042 0.2584 1.8599 0.402 Uiso 1 1 d . . . 
C398 C -0.1518 0.7286 2.1330 0.632 Uiso 1 1 d D . . 
C383 C 0.1852 0.3651 2.2231 0.207 Uiso 1 1 d . . . 
N95 N -0.0106 0.2211 1.8504 0.164 Uiso 1 1 d . . . 
C397 C 0.0057 0.2594 1.8966 0.194 Uiso 1 1 d . . . 
N90 N -0.1370 0.7032 2.1054 0.208 Uiso 1 1 d D . . 
C438 C -0.1236 0.7301 2.1553 0.094 Uiso 1 1 d . . . 
N96 N 0.0512 0.1193 1.9207 0.139 Uiso 1 1 d . . . 
N88 N 0.1124 0.0179 2.2212 0.215 Uiso 1 1 d D . . 
N85 N -0.0449 1.0050 2.2417 0.190 Uiso 1 1 d D . . 
C399 C -0.0665 0.9793 2.2701 0.220 Uiso 1 1 d D . . 
C432 C 0.1894 0.2616 2.2662 0.237 Uiso 1 1 d D . . 
C409 C 0.0825 0.0623 2.1841 1.029 Uiso 1 1 d D . . 
C725 C 0.0769 0.0625 2.2210 0.110 Uiso 1 1 d D . . 
C680 C 0.0552 0.0919 2.2277 0.082 Uiso 1 1 d D . . 
N87 N 0.1449 0.2076 1.9318 0.214 Uiso 1 1 d D . . 
C391 C 0.1262 0.2342 1.9809 0.280 Uiso 1 1 d D . . 
C395 C 0.0945 0.2264 1.9546 0.171 Uiso 1 1 d D . . 
C426 C 0.1712 0.2207 1.9619 0.651 Uiso 1 1 d D . . 
C420 C -0.2797 0.1030 2.0254 0.080 Uiso 1 1 d D . . 
O275 O -0.2436 0.0655 2.0216 0.102 Uiso 1 1 d D . . 
N98 N -0.3649 0.0869 2.0190 0.133 Uiso 1 1 d D . . 
C405 C -0.3501 0.0685 1.9947 0.178 Uiso 1 1 d D . . 
C390 C -0.3089 0.0783 1.9996 0.203 Uiso 1 1 d D . . 
C424 C -0.2987 0.1197 2.0506 0.229 Uiso 1 1 d D . . 
C422 C -0.3412 0.1105 2.0456 0.154 Uiso 1 1 d D . . 
O310 O -0.2212 0.1309 2.0433 0.072 Uiso 1 1 d . . . 
N82 N 0.2491 0.2550 2.2600 0.398 Uiso 1 1 d D . . 
C801 C 0.0824 0.0246 2.1974 0.354 Uiso 1 1 d D . . 
O272 O -0.2199 0.0880 1.9697 0.439 Uiso 1 1 d . . . 
C439 C 0.1032 0.0700 2.2432 0.086 Uiso 1 1 d D . . 
C427 C 0.1293 0.0475 2.2470 0.174 Uiso 1 1 d D . . 
C394 C 0.1023 0.2096 1.9244 0.111 Uiso 1 1 d D . . 
C800 C 0.2525 0.2712 2.2299 0.434 Uiso 1 1 d D . . 
C400 C -0.0001 0.1178 1.9491 0.081 Uiso 1 1 d . . . 
C393 C 0.0115 0.1113 1.9179 0.092 Uiso 1 1 d . . . 
C386 C 0.2249 0.2643 2.2804 0.769 Uiso 1 1 d D . . 
C389 C 0.2260 0.2889 2.2214 0.720 Uiso 1 1 d D . . 
C446 C 0.1667 0.2394 1.9920 1.168 Uiso 1 1 d D . . 
O903 O 0.7659 0.5791 3.0174 0.462 Uiso 1 1 d . . . 
O904 O 0.7254 0.5088 3.0150 0.353 Uiso 1 1 d . . . 
O905 O 0.7808 0.5158 3.0206 0.346 Uiso 1 1 d . . . 
Dy62 Dy -0.1625 0.1327 2.0664 0.031 Uani 1 1 d D . . 
C382 C -0.2360 0.1058 2.0332 0.119 Uiso 1 1 d D . . 
 
loop_ 
 _atom_site_aniso_label 
 _atom_site_aniso_U_11 
 _atom_site_aniso_U_22 
 _atom_site_aniso_U_33 
 _atom_site_aniso_U_23 
 _atom_site_aniso_U_13 
 _atom_site_aniso_U_12 
I1 0.053 0.051 0.066 0.003 -0.007 0.011 
I2 0.066 0.047 0.062 0.003 -0.008 0.013 
I3 0.052 0.047 0.053 0.003 0.003 0.013 
I4 0.057 0.052 0.056 0.005 0.005 0.018 
Dy1A 0.025 0.016 0.025 0.002 -0.003 0.009 
Dy1 0.087 0.039 0.037 0.010 -0.010 0.039 
Dy2A 0.019 0.025 0.024 0.000 0.001 0.007 
Dy2 0.033 0.038 0.041 -0.001 -0.004 0.023 
Dy3A 0.027 0.021 0.028 0.003 -0.006 0.011 
Dy3 0.026 0.019 0.024 0.008 0.004 0.011 
Dy4A 0.024 0.024 0.023 0.002 0.000 0.008 
Dy4 0.058 0.025 0.024 -0.004 -0.016 0.014 
Dy5A 0.027 0.023 0.022 0.001 -0.004 0.010 
Dy5 0.023 0.023 0.027 0.005 0.005 0.005 
Dy6 0.023 0.019 0.046 0.002 0.007 0.005 
Dy7 0.040 0.020 0.026 0.001 -0.005 0.016 
Dy8 0.062 0.029 0.032 -0.003 -0.018 0.027 
Dy9 0.068 0.021 0.024 0.004 -0.006 0.018 
Dy10 0.034 0.021 0.031 0.007 0.006 0.013 
Dy11 0.040 0.021 0.022 0.003 0.002 0.015 
Dy12 0.031 0.014 0.021 0.002 -0.001 0.008 
Dy13 0.057 0.024 0.028 0.001 -0.013 0.021 
Dy14 0.024 0.023 0.024 0.005 0.003 0.010 
Dy15 0.021 0.022 0.046 0.000 -0.004 0.009 
Dy16 0.040 0.037 0.044 -0.010 -0.020 0.023 
Dy17 0.023 0.017 0.029 0.003 0.004 0.008 
Dy18 0.024 0.023 0.021 0.000 -0.005 0.007 
Dy19 0.021 0.026 0.022 0.003 0.001 0.005 
Dy20 0.019 0.020 0.020 0.004 0.002 0.006 
Dy21 0.024 0.017 0.016 0.001 0.000 0.005 
Dy22 0.028 0.016 0.024 0.004 0.002 0.010 
Dy23 0.029 0.026 0.019 0.004 0.003 0.011 
Dy24 0.023 0.021 0.021 0.001 0.003 0.010 
Dy25 0.040 0.022 0.022 -0.004 -0.011 0.012 
Dy26 0.025 0.023 0.019 0.000 -0.003 0.011 
Dy27 0.022 0.022 0.019 -0.001 -0.001 0.007 
Dy28 0.043 0.018 0.022 0.007 0.000 0.010 
Dy29 0.022 0.016 0.020 0.003 -0.002 0.007 
Dy30 0.025 0.024 0.016 0.000 -0.002 0.004 
Dy31 0.047 0.024 0.023 -0.004 -0.014 0.018 
Dy32 0.029 0.020 0.016 0.000 -0.002 0.008 
Dy33 0.019 0.023 0.023 0.003 0.000 0.006 
Dy34 0.037 0.018 0.015 0.000 -0.004 0.006 
Dy35 0.025 0.029 0.032 -0.001 0.002 0.013 
Dy36 0.021 0.022 0.016 0.001 0.000 0.005 
Dy37 0.026 0.019 0.016 -0.001 0.000 0.007 
Dy38 0.021 0.019 0.020 0.003 0.000 0.007 
Dy39 0.020 0.025 0.020 0.002 0.001 0.010 
Dy40 0.025 0.018 0.016 0.001 0.001 0.005 
Dy41 0.022 0.017 0.030 0.001 0.000 0.006 
Dy42 0.020 0.022 0.022 -0.003 0.001 0.005 
Dy43 0.021 0.015 0.015 0.001 -0.001 0.006 
Dy44 0.049 0.021 0.020 0.001 -0.003 0.016 
Dy45 0.028 0.016 0.022 0.000 -0.007 0.006 
Dy46 0.024 0.019 0.016 0.000 -0.001 0.005 
Dy47 0.030 0.020 0.017 -0.001 -0.003 0.010 
Dy48 0.025 0.022 0.021 0.001 0.000 0.010 
Dy49 0.031 0.020 0.016 0.000 -0.004 0.010 
Dy50 0.022 0.022 0.020 0.002 0.004 0.007 
Dy51 0.025 0.026 0.026 0.002 -0.004 0.011 
Dy52 0.049 0.020 0.020 0.006 -0.006 0.005 
Dy53 0.046 0.072 0.051 0.011 0.017 0.038 
Dy54 0.089 0.052 0.031 -0.006 -0.023 0.011 
Dy55 0.084 0.034 0.024 0.005 -0.001 0.033 
Dy56 0.022 0.036 0.032 0.006 0.003 0.013 
Dy57 0.028 0.028 0.036 0.010 0.004 0.012 
Dy58 0.035 0.027 0.032 0.008 0.006 0.017 
Dy59 0.028 0.036 0.033 0.009 0.008 0.004 
Dy60 0.060 0.031 0.020 0.001 -0.007 0.021 
Dy61 0.037 0.035 0.030 0.005 0.008 0.019 
Dy63 0.026 0.019 0.017 0.003 0.000 0.003 
Dy64 0.022 0.020 0.027 0.001 0.003 0.002 
Dy65 0.028 0.022 0.024 0.003 0.004 0.011 
Dy66 0.062 0.033 0.026 0.008 0.013 0.019 
Dy67 0.025 0.025 0.028 0.004 -0.002 0.004 
Dy68 0.039 0.026 0.019 0.006 0.004 0.011 
Dy69 0.036 0.025 0.021 0.003 -0.002 -0.003 
Dy70 0.052 0.029 0.018 0.003 0.000 0.020 
Dy71 0.032 0.020 0.021 0.004 0.001 0.003 
Dy72 0.038 0.038 0.039 0.011 0.016 0.015 
Dy73 0.042 0.038 0.031 0.002 -0.009 0.026 
Dy74 0.048 0.029 0.020 -0.001 0.000 0.020 
Dy75 0.038 0.030 0.021 0.001 -0.003 0.021 
Dy76 0.022 0.023 0.024 0.001 -0.003 0.008 
Dy77 0.021 0.018 0.021 0.002 0.001 0.005 
Dy78 0.022 0.018 0.020 0.003 -0.001 0.008 
Dy79 0.026 0.017 0.024 0.002 -0.004 0.008 
Dy80 0.024 0.017 0.037 0.005 0.003 0.002 
Dy81 0.021 0.014 0.027 0.004 0.002 0.005 
Dy82 0.024 0.020 0.030 0.006 -0.002 0.009 
Dy83 0.034 0.031 0.046 0.020 0.001 0.016 
Dy84 0.022 0.026 0.034 0.007 0.000 0.011 
Dy85 0.024 0.020 0.028 0.010 0.000 0.006 
Dy86 0.033 0.027 0.026 -0.003 -0.005 0.014 
Dy87 0.021 0.017 0.024 0.006 0.000 0.006 
Dy88 0.022 0.016 0.027 0.002 -0.002 0.004 
Dy89 0.030 0.031 0.028 0.013 0.000 0.007 
Dy90 0.024 0.018 0.024 0.001 -0.004 0.006 
Dy91 0.022 0.026 0.031 0.000 -0.006 0.009 
Dy92 0.020 0.019 0.019 0.003 0.000 0.008 
Dy93 0.018 0.019 0.034 0.005 -0.002 0.004 
Dy94 0.021 0.016 0.023 0.004 -0.002 0.006 
Dy95 0.023 0.014 0.022 0.004 0.003 0.007 
Dy96 0.029 0.020 0.028 0.007 0.002 0.008 
Dy97 0.021 0.022 0.020 0.004 0.000 0.005 
Dy98 0.0201(6) 0.0187(6) 0.0219(6) 0.0028(5) -0.0007(5) 0.0064(5) 
Dy99 0.0319(6) 0.0175(6) 0.0230(6) 0.0010(5) -0.0022(5) 0.0107(5) 
Dy62 0.038 0.034 0.025 0.000 -0.009 0.019 
 
_geom_special_details 
; 
 All esds (except the esd in the dihedral angle between two l.s. planes) 
 are estimated using the full covariance matrix.  The cell esds are taken 
 into account individually in the estimation of esds in distances, angles 
 and torsion angles; correlations between esds in cell parameters are only 
 used when they are defined by crystal symmetry.  An approximate (isotropic) 
 treatment of cell esds is used for estimating esds involving l.s. planes. 
; 
 
loop_ 
 _geom_bond_atom_site_label_1 
 _geom_bond_atom_site_label_2 
 _geom_bond_distance 
 _geom_bond_site_symmetry_2 
 _geom_bond_publ_flag 
O2 Dy1 2.3617 . ? 
O4 C217 1.2484 . ? 
O12 C82 1.4376 . ? 
O12 Dy1 2.4359 . ? 
O13 C82 1.2687 . ? 
O13 Dy1 2.4636 . ? 
O14 Dy4 2.3642 . ? 
O15 Dy2 2.3973 . ? 
O16 C164 1.3558 . ? 
O16 Dy2 2.2581 . ? 
O17 C311 1.1908 . ? 
O17 Dy23 2.3031 . ? 
O18 C151 1.3058 . ? 
O18 Dy10 2.3771 . ? 
O19 Dy18 2.4784 . ? 
O21 Dy5 2.3897 . ? 
O22 Dy7 2.3836 . ? 
O23 C180 1.2293 . ? 
O23 Dy16 2.2423 . ? 
O24 Dy52 2.4483 . ? 
O25 Dy30 2.4617 . ? 
O26 Dy11 2.3807 . ? 
O27 C151 1.1972 . ? 
O27 Dy10 2.3895 . ? 
O28 C245 1.2452 . ? 
O28 Dy51 2.3882 . ? 
O29 C311 1.3280 . ? 
O29 Dy23 2.4669 . ? 
O30 C214 1.2901 . ? 
O30 Dy1 2.2533 . ? 
O31 Dy23 2.3483 . ? 
O32 C146 1.3175 . ? 
O32 Dy8 2.3986 . ? 
O33 Dy44 2.4973 . ? 
O34 C355 1.2525 . ? 
O34 Dy1 2.2988 . ? 
O35 C355 1.2250 . ? 
O35 Dy8 2.3505 . ? 
O36 C346 1.2803 . ? 
O36 Dy23 2.2743 . ? 
O38 Dy16 2.3450 . ? 
O39 C250 1.2707 . ? 
O39 Dy16 2.4233 . ? 
O40 Dy44 2.4631 . ? 
O41 C285 1.2630 . ? 
O41 Dy10 2.2477 . ? 
O42 C203 1.1435 . ? 
O42 Dy14 2.5219 . ? 
O43 C107 1.2825 . ? 
O43 Dy42 2.4807 . ? 
O44 Dy4 2.4218 . ? 
O45 C228 1.2948 . ? 
O45 Dy2 2.2144 . ? 
O46 C198 1.2417 . ? 
O46 Dy35 2.4057 . ? 
O47 C338 1.3504 . ? 
O47 Dy6 2.3231 . ? 
O48 C214 1.2300 . ? 
O48 Dy13 2.3200 . ? 
O49 Dy34 2.4278 . ? 
O50 C250 1.2272 . ? 
O50 Dy16 2.4158 . ? 
O51 C245 1.2312 . ? 
O51 Dy51 2.4238 . ? 
O52 C260 1.2680 . ? 
O52 Dy46 2.3090 . ? 
O53 Dy35 2.4404 . ? 
O54 Dy9 2.3224 . ? 
O54 Dy8 2.3483 . ? 
O54 Dy1 2.3709 . ? 
O55 C288 1.2893 . ? 
O55 Dy41 2.4439 . ? 
O56 Dy5 2.4798 . ? 
O57 N70 1.3170 . ? 
O57 Dy15 2.3483 . ? 
O57 Dy2 2.5018 . ? 
O58 Dy19 2.3483 . ? 
O59 C107 1.1954 . ? 
O59 Dy42 2.4210 . ? 
O60 Dy10 2.3966 . ? 
O61 C166 1.2644 . ? 
O61 Dy35 2.3319 . ? 
O62 Dy31 2.3654 . ? 
O62 Dy16 2.3910 . ? 
O62 Dy8 2.4062 . ? 
O63 Dy6 2.3941 . ? 
O64 C298 1.2180 . ? 
O64 Dy27 2.3754 . ? 
O65 C327 1.2797 . ? 
O65 Dy9 2.3415 . ? 
O66 C240 1.2412 . ? 
O66 Dy9 2.3422 . ? 
O67 C276 1.3304 . ? 
O67 Dy27 2.4104 . ? 
O68 Dy9 2.3637 . ? 
O68 Dy13 2.3669 . ? 
O68 Dy1 2.3700 . ? 
O69 Dy52 2.4283 . ? 
O70 C373 1.2751 . ? 
O70 Dy4 2.3562 . ? 
O71 C146 1.1435 . ? 
O71 Dy31 2.4338 . ? 
O72 Dy45 2.3483 . ? 
O72 Dy31 2.3545 . ? 
O72 Dy25 2.3933 . ? 
O73 C273 1.2786 . ? 
O73 Dy4 2.3766 . ? 
O74 C233 1.2218 . ? 
O74 Dy14 2.2503 . ? 
O75 C203 1.3019 . ? 
O75 Dy14 2.4086 . ? 
O76 C276 1.2088 . ? 
O76 Dy14 2.3438 . ? 
O77 C373 1.2561 . ? 
O77 Dy49 2.3219 . ? 
O78 Dy11 2.4726 . ? 
O79 N63 1.3845 . ? 
O79 Dy2 2.3816 . ? 
O79 Dy13 2.4362 . ? 
O80 C269 1.2455 . ? 
O80 Dy32 2.3624 . ? 
O81 C217 1.2960 . ? 
O81 Dy44 2.2627 . ? 
O82 N60 1.2776 . ? 
O82 Dy9 2.3860 . ? 
O82 Dy52 2.4396 . ? 
O83 C327 1.2225 . ? 
O83 Dy52 2.2483 . ? 
O84 Dy51 2.4140 . ? 
O85 Dy30 2.3934 . ? 
O86 Dy2 2.4201 . ? 
O87 C258 1.2937 . ? 
O87 Dy18 2.2689 . ? 
O88 C178 1.2411 . ? 
O88 Dy25 2.3108 . ? 
O89 C127 1.2537 . ? 
O89 Dy20 2.4606 . ? 
O90 C269 1.2247 . ? 
O90 Dy44 2.3229 . ? 
O91 C272 1.2774 . ? 
O91 Dy50 2.4388 . ? 
O92 C190 1.2777 . ? 
O92 Dy12 2.4035 . ? 
O93 C115 1.2307 . ? 
O93 Dy24 2.3008 . ? 
O94 C108 1.2592 . ? 
O94 Dy42 2.2734 . ? 
O95 C287 1.2337 . ? 
O95 Dy6 2.3745 . ? 
O96 Dy52 2.4032 . ? 
O96 Dy40 2.4288 . ? 
O96 Dy34 2.4302 . ? 
O98 C243 1.2851 . ? 
O98 Dy19 2.4937 . ? 
O99 C183 1.3209 . ? 
O99 Dy13 2.4203 . ? 
O100 C130 1.2849 . ? 
O100 Dy6 2.3016 . ? 
O101 Dy50 2.3081 . ? 
O101 Dy39 2.3826 . ? 
O101 Dy48 2.4146 . ? 
O102 C130 1.2388 . ? 
O102 Dy17 2.3486 . ? 
O103 C180 1.2321 . ? 
O103 Dy15 2.3367 . ? 
O104 C190 1.2780 . ? 
O104 Dy28 2.2502 . ? 
O105 C233 1.2624 . ? 
O105 Dy38 2.3252 . ? 
O106 N63 1.2675 . ? 
O106 Dy15 2.4543 . ? 
O106 Dy16 2.7813 . ? 
O107 C117 1.3052 . ? 
O107 Dy3 2.4352 . ? 
O108 Dy11 2.4370 . ? 
O109 Dy41 2.3241 . ? 
O109 Dy6 2.3457 . ? 
O109 Dy15 2.3962 . ? 
O110 C346 1.2009 . ? 
O110 Dy50 2.2703 . ? 
O111 Dy42 2.3395 . ? 
O111 Dy21 2.3679 . ? 
O111 Dy43 2.3810 . ? 
O112 Dy35 2.4188 . ? 
O113 N71 1.3124 . ? 
O113 Dy12 2.2651 . ? 
O113 Dy28 2.3913 . ? 
O114 C115 1.2050 . ? 
O114 Dy26 2.3414 . ? 
O115 C108 1.2446 . ? 
O115 Dy40 2.3642 . ? 
O116 C228 1.2182 . ? 
O116 Dy15 2.3389 . ? 
O117 C178 1.2674 . ? 
O117 Dy31 2.3377 . ? 
O118 C243 1.1814 . ? 
O118 Dy19 2.4237 . ? 
O119 Dy52 2.3912 . ? 
O120 C288 1.2251 . ? 
O120 Dy45 2.3188 . ? 
O121 N75 1.3209 . ? 
O121 Dy38 2.3611 . ? 
O121 Dy14 2.4925 . ? 
O122 C198 1.2770 . ? 
O122 Dy48 2.2977 . ? 
O123 C111 1.2399 . ? 
O123 Dy40 2.3546 . ? 
O124 C289 1.2576 . ? 
O124 Dy29 2.2113 . ? 
O125 Dy24 2.3748 . ? 
O126 C273 1.2060 . ? 
O126 Dy47 2.3592 . ? 
O127 C272 1.2467 . ? 
O127 Dy19 2.2939 . ? 
O128 N71 1.2969 . ? 
O128 Dy9 2.3283 . ? 
O128 Dy28 2.5105 . ? 
O129 C133 1.2545 . ? 
O129 Dy30 2.3579 . ? 
O130 C279 1.2369 . ? 
O130 Dy51 2.3099 . ? 
O131 Dy3 2.3389 . ? 
O131 Dy17 2.4283 . ? 
O131 Dy22 2.4345 . ? 
O132 Dy9 2.3541 . ? 
O132 Dy13 2.3805 . ? 
O132 Dy8 2.3906 . ? 
O133 C293 1.2464 . ? 
O133 Dy20 2.3143 . ? 
O134 C270 1.2485 . ? 
O134 Dy48 2.3919 . ? 
O135 N60 1.3245 . ? 
O135 Dy34 2.3342 . ? 
O135 Dy52 2.3705 . ? 
O136 C132 1.2450 . ? 
O136 Dy17 2.3880 . ? 
O137 Dy45 2.3254 . ? 
O137 Dy34 2.3421 . ? 
O137 Dy25 2.3957 . ? 
O138 Dy29 2.3796 . ? 
O139 C379 1.2628 . ? 
O139 Dy25 2.3065 . ? 
O140 C240 1.2460 . ? 
O140 Dy28 2.2881 . ? 
O141 C102 1.2420 . ? 
O141 Dy33 2.3615 . ? 
O142 C112 1.2853 . ? 
O142 Dy49 2.4598 . ? 
O143 C165 1.2901 . ? 
O143 Dy44 2.3334 . ? 
O144 N60 1.3043 . ? 
O144 Dy8 2.3817 . ? 
O144 Dy31 2.4163 . ? 
O145 Dy46 2.3577 . ? 
O145 Dy30 2.3605 . ? 
O145 Dy36 2.4045 . ? 
O146 Dy5 2.4127 . ? 
O147 C132 1.2753 . ? 
O147 Dy22 2.3848 . ? 
O148 C102 1.2658 . ? 
O148 Dy5 2.3466 . ? 
O149 Dy26 2.3223 . ? 
O149 Dy37 2.3590 . ? 
O149 Dy32 2.3715 . ? 
O150 C123 1.2866 . ? 
O150 Dy25 2.3486 . ? 
O151 Dy35 2.4126 . ? 
O152 C258 1.2285 . ? 
O152 Dy33 2.4150 . ? 
O153 Dy3 2.3264 . ? 
O154 C263 1.2293 . ? 
O154 Dy24 2.2776 . ? 
O155 C270 1.2339 . ? 
O155 Dy47 2.3759 . ? 
O156 Dy25 2.4021 . ? 
O157 C166 1.1982 . ? 
O157 Dy39 2.3392 . ? 
O158 C298 1.2166 . ? 
O158 Dy39 2.4502 . ? 
O159 C129 1.2352 . ? 
O159 Dy37 2.3977 . ? 
O160 C260 1.2778 . ? 
O160 Dy30 2.3212 . ? 
O161 C293 1.2985 . ? 
O161 Dy5 2.3237 . ? 
O162 Dy13 2.3461 . ? 
O162 Dy8 2.3467 . ? 
O162 Dy1 2.3563 . ? 
O163 Dy25 2.3320 . ? 
O163 Dy31 2.3387 . ? 
O163 Dy34 2.3887 . ? 
O164 Dy36 2.3794 . ? 
O165 C183 1.2767 . ? 
O165 Dy7 2.3214 . ? 
O166 Dy24 2.4111 . ? 
O167 N74 1.2957 . ? 
O167 Dy50 2.3751 . ? 
O167 Dy23 2.5004 . ? 
O168 C165 1.2522 . ? 
O168 Dy37 2.3600 . ? 
O169 C105 1.2083 . ? 
O169 Dy22 2.3477 . ? 
O170 Dy11 2.3428 . ? 
O170 Dy12 2.3822 . ? 
O170 Dy7 2.3863 . ? 
O171 N76 1.3618 . ? 
O171 Dy18 2.3138 . ? 
O171 Dy51 2.4015 . ? 
O172 Dy11 2.4292 . ? 
O173 N64 1.2510 . ? 
O173 Dy16 2.4402 . ? 
O173 Dy15 2.4410 . ? 
O174 Dy49 2.3766 . ? 
O174 Dy47 2.3792 . ? 
O174 Dy4 2.3871 . ? 
O175 C109 1.2852 . ? 
O175 Dy43 2.3328 . ? 
O176 C262 1.2607 . ? 
O176 Dy42 2.3212 . ? 
O177 N67 1.3404 . ? 
O177 Dy46 2.3020 . ? 
O177 Dy19 2.3772 . ? 
O178 Dy23 2.3815 . ? 
O178 Dy49 2.3886 . ? 
O178 Dy32 2.4109 . ? 
O179 N74 1.3169 . ? 
O179 Dy49 2.3334 . ? 
O179 Dy23 2.3439 . ? 
O180 C111 1.2329 . ? 
O180 Dy34 2.3334 . ? 
O181 Dy18 2.3532 . ? 
O181 Dy4 2.3728 . ? 
O181 Dy47 2.3932 . ? 
O182 N73 1.3382 . ? 
O182 Dy50 2.4488 . ? 
O182 Dy19 2.7521 . ? 
O183 C279 1.2405 . ? 
O183 Dy26 2.3235 . ? 
O184 Dy35 2.3188 . ? 
O184 Dy50 2.3501 . ? 
O184 Dy48 2.3837 . ? 
O185 N78 1.3240 . ? 
O185 Dy3 2.3707 . ? 
O185 Dy17 2.3874 . ? 
O186 N72 1.2825 . ? 
O186 Dy45 2.3420 . ? 
O186 Dy29 2.3966 . ? 
O187 N65 1.2767 . ? 
O187 Dy14 2.3387 . ? 
O187 Dy39 2.3926 . ? 
O188 C109 1.2266 . ? 
O188 Dy29 2.2606 . ? 
O189 Dy48 2.3403 . ? 
O189 Dy39 2.3939 . ? 
O189 Dy35 2.4305 . ? 
O190 Dy49 2.3416 . ? 
O190 Dy4 2.3954 . ? 
O190 Dy18 2.4053 . ? 
O191 Dy38 2.3160 . ? 
O191 Dy20 2.3684 . ? 
O191 Dy33 2.4488 . ? 
O192 Dy26 2.3385 . ? 
O192 Dy32 2.3606 . ? 
O192 Dy44 2.3757 . ? 
O193 N69 1.3343 . ? 
O193 Dy33 2.3433 . ? 
O193 Dy51 2.3630 . ? 
O194 Dy39 2.3410 . ? 
O194 Dy35 2.3626 . ? 
O194 Dy50 2.3844 . ? 
O195 N73 1.2759 . ? 
O195 Dy23 2.3610 . ? 
O195 Dy32 2.3973 . ? 
O196 Dy37 2.3507 . ? 
O196 Dy32 2.3577 . ? 
O196 Dy44 2.3895 . ? 
O197 N62 1.2560 . ? 
O197 Dy52 2.3414 . ? 
O197 Dy40 2.3861 . ? 
O198 Dy17 2.3310 . ? 
O198 Dy15 2.3959 . ? 
O198 Dy6 2.4580 . ? 
O199 C129 1.2503 . ? 
O199 Dy46 2.4282 . ? 
O200 C105 1.3060 . ? 
O200 Dy11 2.3525 . ? 
O201 C287 1.2192 . ? 
O201 Dy41 2.3251 . ? 
O202 C123 1.2705 . ? 
O202 Dy45 2.3977 . ? 
O203 C106 1.2550 . ? 
O203 Dy3 2.2632 . ? 
O204 N63 1.2583 . ? 
O204 Dy8 2.3351 . ? 
O204 Dy16 2.3914 . ? 
O205 Dy21 2.3463 . ? 
O205 Dy28 2.3925 . ? 
O205 Dy12 2.4132 . ? 
O206 N76 1.3197 . ? 
O206 Dy26 2.3532 . ? 
O206 Dy51 2.4548 . ? 
O207 N64 1.3075 . ? 
O207 Dy31 2.3395 . ? 
O207 Dy16 2.3619 . ? 
O208 Dy14 2.3242 . ? 
O208 Dy39 2.3920 . ? 
O208 Dy27 2.4211 . ? 
O209 N65 1.2419 . ? 
O209 Dy38 2.5293 . ? 
O209 Dy10 2.7330 . ? 
O209 Dy14 2.8652 . ? 
O210 C285 1.2573 . ? 
O210 Dy38 2.3768 . ? 
O211 N69 1.2483 . ? 
O211 Dy26 2.5501 . ? 
O211 Dy51 2.6754 . ? 
O212 N70 1.3232 . ? 
O212 Dy7 2.3241 . ? 
O212 Dy2 2.3963 . ? 
O213 C127 1.2626 . ? 
O213 Dy36 2.3329 . ? 
O214 N62 1.2887 . ? 
O214 Dy28 2.5439 . ? 
O214 Dy9 2.7091 . ? 
O215 N76 1.2210 . ? 
O215 Dy32 2.4092 . ? 
O215 Dy49 2.4270 . ? 
O216 N77 1.2693 . ? 
O216 Dy47 2.3320 . ? 
O216 Dy10 2.3965 . ? 
O217 N67 1.3326 . ? 
O217 Dy50 2.3387 . ? 
O217 Dy19 2.5014 . ? 
O218 Dy6 2.5246 . ? 
O219 N66 1.3006 . ? 
O219 Dy36 2.3175 . ? 
O219 Dy24 2.4256 . ? 
O220 N61 1.2913 . ? 
O220 Dy22 2.3013 . ? 
O220 Dy3 2.3655 . ? 
O221 Dy37 2.3470 . ? 
O221 Dy44 2.3805 . ? 
O221 Dy26 2.3807 . ? 
O222 C124 1.2593 . ? 
O222 Dy21 2.4617 . ? 
O223 N78 1.2779 . ? 
O223 Dy43 2.5036 . ? 
O223 Dy29 2.6552 . ? 
O224 N67 1.2623 . ? 
O224 Dy39 2.3498 . ? 
O224 Dy27 2.4030 . ? 
O225 Dy48 2.3823 . ? 
O225 Dy10 2.4020 . ? 
O225 Dy47 2.4338 . ? 
O226 Dy46 2.3780 . ? 
O226 Dy27 2.3786 . ? 
O226 Dy30 2.4103 . ? 
O227 N75 1.2897 . ? 
O227 Dy27 2.3093 . ? 
O227 Dy14 2.4065 . ? 
O228 N65 1.3107 . ? 
O228 Dy10 2.3710 . ? 
O228 Dy48 2.3865 . ? 
O229 N72 1.2909 . ? 
O229 Dy43 2.3680 . ? 
O229 Dy29 2.4317 . ? 
O230 Dy5 2.3122 . ? 
O230 Dy38 2.3677 . ? 
O230 Dy20 2.3691 . ? 
O231 N66 1.3575 . ? 
O231 Dy26 2.3411 . ? 
O231 Dy24 2.4818 . ? 
O232 N69 1.3105 . ? 
O232 Dy24 2.3523 . ? 
O232 Dy20 2.4171 . ? 
O233 Dy29 2.3299 . ? 
O233 Dy45 2.4018 . ? 
O233 Dy41 2.4545 . ? 
O234 C117 1.2275 . ? 
O234 Dy3 2.4790 . ? 
O235 C223 1.2314 . ? 
O235 Dy28 2.2633 . ? 
O236 N72 1.3025 . ? 
O236 Dy40 2.3453 . ? 
O236 Dy34 2.4489 . ? 
O237 N61 1.3476 . ? 
O237 Dy43 2.3310 . ? 
O237 Dy3 2.4620 . ? 
O238 N71 1.3023 . ? 
O238 Dy13 2.3832 . ? 
O238 Dy7 2.4470 . ? 
O239 C112 1.2136 . ? 
O239 Dy32 2.4106 . ? 
O240 Dy33 2.3444 . ? 
O240 Dy20 2.3481 . ? 
O240 Dy5 2.4155 . ? 
O241 Dy24 2.3483 . ? 
O241 Dy20 2.4026 . ? 
O241 Dy36 2.4382 . ? 
O242 Dy19 2.3578 . ? 
O242 Dy37 2.3828 . ? 
O242 Dy46 2.4057 . ? 
O243 Dy41 2.3389 . ? 
O243 Dy17 2.3612 . ? 
O243 Dy6 2.3932 . ? 
O244 Dy42 2.3573 . ? 
O245 N64 1.3207 . ? 
O245 Dy41 2.3384 . ? 
O245 Dy45 2.3986 . ? 
O246 Dy15 2.3479 . ? 
O246 Dy17 2.3680 . ? 
O246 Dy41 2.3888 . ? 
O247 N78 1.2856 . ? 
O247 Dy29 2.3231 . ? 
O247 Dy41 2.3893 . ? 
O248 Dy2 2.3432 . ? 
O248 Dy13 2.4132 . ? 
O248 Dy7 2.4260 . ? 
O249 Dy36 2.3815 . ? 
O249 Dy30 2.4032 . ? 
O249 Dy27 2.4224 . ? 
O250 Dy11 2.3585 . ? 
O250 Dy22 2.3715 . ? 
O250 Dy7 2.4159 . ? 
Dy1A O454 2.3101 . ? 
Dy1A O441 2.3129 . ? 
Dy1A O504 2.3454 . ? 
Dy1A O495 2.3478 . ? 
Dy1A O532 2.3969 . ? 
Dy1A O475 2.4029 . ? 
Dy1A O339 2.4071 . ? 
Dy1A O429 2.4253 . ? 
Dy1A Dy94 3.7294 . ? 
Dy1A Dy95 3.7353 . ? 
Dy1A Dy99 3.8662(11) . ? 
Dy1A Dy84 3.8769 . ? 
Dy1 C82 2.8419 . ? 
Dy1 Dy8 3.6866 . ? 
Dy1 Dy13 3.7575 . ? 
Dy1 Dy9 3.8818 . ? 
Dy2A O471 2.2968 . ? 
Dy2A O465 2.3128 . ? 
Dy2A O523 2.3368 . ? 
Dy2A O382 2.3950 . ? 
Dy2A O431 2.4019 . ? 
Dy2A O536 2.4243 . ? 
Dy2A O436 2.4246 . ? 
Dy2A O453 2.4907 . ? 
Dy2A C474 2.7933 . ? 
Dy2A Dy97 3.7447 . ? 
Dy2A Dy98 3.7843(10) . ? 
Dy2A Dy92 3.8485 . ? 
Dy2 N70 2.8602 . ? 
Dy2 Dy7 3.8577 . ? 
Dy2 Dy13 3.9473 . ? 
Dy3A O492 2.3173 . ? 
Dy3A O370 2.3320 . ? 
Dy3A O512 2.3488 . ? 
Dy3A O380 2.3517 . ? 
Dy3A O413 2.3578 . ? 
Dy3A O392 2.3811 . ? 
Dy3A O515 2.3992 . ? 
Dy3A O480 2.4201 . ? 
Dy3A Dy83 3.6832 . ? 
Dy3A Dy96 3.7307 . ? 
Dy3A Dy82 3.7976 . ? 
Dy3A Dy5A 3.8385 . ? 
Dy3 C117 2.8016 . ? 
Dy3 N61 2.8569 . ? 
Dy3 Dy22 3.8254 . ? 
Dy3 Dy17 3.9326 . ? 
Dy4A O518 2.3217 . ? 
Dy4A O374 2.3273 . ? 
Dy4A O530 2.3391 . ? 
Dy4A O485 2.3534 . ? 
Dy4A O473 2.4050 . ? 
Dy4A O439 2.4225 . ? 
Dy4A O312 2.4297 . ? 
Dy4A O448 2.4407 . ? 
Dy4A Dy5A 3.7247 . ? 
Dy4A Dy90 3.7982 . ? 
Dy4A Dy86 3.8034 . ? 
Dy4A Dy97 3.9165 . ? 
Dy4 O37 2.3789 . ? 
Dy4 Dy47 3.7315 . ? 
Dy4 Dy49 3.7984 . ? 
Dy4 Dy18 3.8753 . ? 
Dy5A O439 2.3226 . ? 
Dy5A O395 2.3617 . ? 
Dy5A O503 2.3647 . ? 
Dy5A O530 2.3660 . ? 
Dy5A O401 2.3686 . ? 
Dy5A O480 2.4048 . ? 
Dy5A O515 2.4062 . ? 
Dy5A O364 2.4553 . ? 
Dy5A Dy90 3.7613 . ? 
Dy5A Dy86 3.7796 . ? 
Dy5 O254 2.3840 . ? 
Dy5 Dy20 3.7553 . ? 
Dy5 Dy33 3.7907 . ? 
Dy5 Dy38 3.8612 . ? 
Dy6 Dy41 3.7496 . ? 
Dy6 Dy17 3.7592 . ? 
Dy6 Dy15 3.9499 . ? 
Dy7 O265 2.3431 . ? 
Dy7 Dy22 3.7061 . ? 
Dy7 Dy12 3.7362 . ? 
Dy7 Dy11 3.8732 . ? 
Dy8 Dy9 3.7064 . ? 
Dy8 Dy13 3.8036 . ? 
Dy8 Dy31 3.8437 . ? 
Dy9 Dy13 3.7562 . ? 
Dy10 O271 2.4297 . ? 
Dy10 C151 2.6068 . ? 
Dy10 N77 2.8515 . ? 
Dy10 Dy48 3.8802 . ? 
Dy11 O259 2.4296 . ? 
Dy11 Dy22 3.7558 . ? 
Dy11 Dy12 3.7862 . ? 
Dy12 O265 2.3217 . ? 
Dy12 O543 2.3660 . ? 
Dy12 O259 2.3771 . ? 
Dy12 O269 2.4058 . ? 
Dy12 Dy22 3.8355 . ? 
Dy12 Dy21 3.8558 . ? 
Dy14 C203 2.7922 . ? 
Dy14 N75 2.8833 . ? 
Dy14 N65 2.9379 . ? 
Dy15 Dy41 3.6769 . ? 
Dy15 Dy17 3.7349 . ? 
Dy16 C250 2.7721 . ? 
Dy16 N64 2.7927 . ? 
Dy16 N63 2.9298 . ? 
Dy17 O263 2.3638 . ? 
Dy17 Dy41 3.8257 . ? 
Dy17 Dy22 3.8760 . ? 
Dy18 O262 2.3411 . ? 
Dy18 O255 2.3850 . ? 
Dy18 O256 2.4106 . ? 
Dy18 Dy49 3.7437 . ? 
Dy18 Dy47 3.7892 . ? 
Dy18 Dy33 3.9019 . ? 
Dy19 O260 2.3693 . ? 
Dy19 C243 2.7056 . ? 
Dy19 N67 2.8980 . ? 
Dy19 Dy37 3.8626 . ? 
Dy20 O261 2.3719 . ? 
Dy20 Dy38 3.7136 . ? 
Dy20 Dy33 3.8226 . ? 
Dy20 Dy36 3.9215 . ? 
Dy21 O264 2.3443 . ? 
Dy21 O269 2.3482 . ? 
Dy21 O267 2.3685 . ? 
Dy21 O258 2.4092 . ? 
Dy21 O257 2.4114 . ? 
Dy21 Dy43 3.7120 . ? 
Dy21 Dy42 3.7635 . ? 
Dy21 Dy40 3.8083 . ? 
Dy22 O259 2.3575 . ? 
Dy22 O263 2.3855 . ? 
Dy22 O265 2.3926 . ? 
Dy23 C311 2.7380 . ? 
Dy23 N74 2.8549 . ? 
Dy23 Dy49 3.8688 . ? 
Dy23 Dy32 3.8913 . ? 
Dy24 N66 2.8967 . ? 
Dy24 Dy36 3.9061 . ? 
Dy25 N68 2.5805 . ? 
Dy25 Dy45 3.7385 . ? 
Dy25 Dy31 3.7623 . ? 
Dy25 Dy34 3.8118 . ? 
Dy26 Dy37 3.7241 . ? 
Dy26 Dy32 3.7323 . ? 
Dy26 Dy44 3.9038 . ? 
Dy27 O251 2.3418 . ? 
Dy27 Dy36 3.7444 . ? 
Dy27 Dy46 3.8188 . ? 
Dy27 Dy30 3.8376 . ? 
Dy28 O258 2.3441 . ? 
Dy28 N62 2.8640 . ? 
Dy28 N71 2.8674 . ? 
Dy29 N72 2.8378 . ? 
Dy29 N78 2.8665 . ? 
Dy29 Dy41 3.8656 . ? 
Dy29 Dy45 3.9082 . ? 
Dy30 N79 2.6289 . ? 
Dy30 Dy46 3.7853 . ? 
Dy30 Dy36 3.9412 . ? 
Dy31 O266 2.3800 . ? 
Dy31 Dy34 3.7197 . ? 
Dy31 Dy45 3.7717 . ? 
Dy32 Dy44 3.7793 . ? 
Dy32 Dy37 3.8099 . ? 
Dy33 O254 2.3390 . ? 
Dy33 O255 2.3816 . ? 
Dy33 O256 2.4610 . ? 
Dy33 Dy38 3.7243 . ? 
Dy34 O266 2.2957 . ? 
Dy34 Dy45 3.7797 . ? 
Dy34 Dy40 3.9088 . ? 
Dy35 Dy48 3.7116 . ? 
Dy35 Dy39 3.8085 . ? 
Dy35 Dy50 3.9036 . ? 
Dy36 O251 2.3026 . ? 
Dy36 O261 2.4449 . ? 
Dy36 Dy46 3.7200 . ? 
Dy37 O260 2.3306 . ? 
Dy37 O270 2.4144 . ? 
Dy37 Dy44 3.7207 . ? 
Dy38 O271 2.3571 . ? 
Dy38 O254 2.3783 . ? 
Dy39 Dy50 3.7002 . ? 
Dy39 Dy48 3.8382 . ? 
Dy40 O264 2.3638 . ? 
Dy40 O252 2.3765 . ? 
Dy40 O257 2.3821 . ? 
Dy40 Dy42 3.7266 . ? 
Dy40 Dy43 3.7795 . ? 
Dy42 O252 2.3301 . ? 
Dy42 O264 2.4311 . ? 
Dy42 C107 2.7846 . ? 
Dy42 Dy43 3.8347 . ? 
Dy43 O257 2.3225 . ? 
Dy43 O252 2.3530 . ? 
Dy43 O268 2.4032 . ? 
Dy45 O266 2.3472 . ? 
Dy46 O251 2.3616 . ? 
Dy46 O270 2.3951 . ? 
Dy47 O262 2.3457 . ? 
Dy47 O253 2.4059 . ? 
Dy47 Dy49 3.7918 . ? 
Dy47 Dy48 3.8620 . ? 
Dy48 O253 2.3919 . ? 
Dy48 Dy50 3.7314 . ? 
Dy49 O262 2.3457 . ? 
Dy51 O256 2.3775 . ? 
Dy51 C245 2.6420 . ? 
Dy51 N76 2.8796 . ? 
Dy51 N69 2.9273 . ? 
Dy52 N60 2.8520 . ? 
Dy53 O291 2.2764 . ? 
Dy53 O300 2.3556 . ? 
Dy53 O461 2.3819 . ? 
Dy53 O375 2.3835 . ? 
Dy53 O396 2.4114 . ? 
Dy53 O286 2.4291 . ? 
Dy53 O297 2.4376 . ? 
Dy53 O273 2.4541 . ? 
Dy53 Dy56 3.7702 . ? 
Dy53 Dy61 3.7738 . ? 
Dy53 Dy72 3.8987 . ? 
Dy54 O457 2.2937 . ? 
Dy54 O287 2.3124 . ? 
Dy54 O306 2.3196 . ? 
Dy54 O274 2.3325 . ? 
Dy54 O388 2.3963 . ? 
Dy54 O362 2.4053 . ? 
Dy54 O292 2.4731 . ? 
Dy54 O272 2.4967 . ? 
Dy54 Dy74 3.7433 . ? 
Dy54 Dy60 3.8219 . ? 
Dy54 Dy62 3.8675 . ? 
Dy55 O307 2.2267 . ? 
Dy55 O351 2.3243 . ? 
Dy55 O367 2.3544 . ? 
Dy55 O327 2.3798 . ? 
Dy55 O476 2.3841 . ? 
Dy55 O423 2.4167 . ? 
Dy55 O317 2.4803 . ? 
Dy55 O315 2.5247 . ? 
Dy55 Dy70 3.7506 . ? 
Dy55 Dy68 3.7590 . ? 
Dy55 Dy75 3.8562 . ? 
Dy56 O375 2.3466 . ? 
Dy56 O345 2.3690 . ? 
Dy56 O396 2.3698 . ? 
Dy56 O494 2.3725 . ? 
Dy56 O470 2.3842 . ? 
Dy56 O402 2.3891 . ? 
Dy56 O467 2.4034 . ? 
Dy56 O333 2.4795 . ? 
Dy56 Dy72 3.7219 . ? 
Dy56 Dy61 3.8406 . ? 
Dy56 Dy57 3.8816 . ? 
Dy57 O347 2.2564 . ? 
Dy57 O363 2.2888 . ? 
Dy57 O467 2.3102 . ? 
Dy57 O402 2.3337 . ? 
Dy57 O354 2.4105 . ? 
Dy57 O302 2.4394 . ? 
Dy57 O497 2.4822 . ? 
Dy57 O314 2.5236 . ? 
Dy57 C680 2.7895 . ? 
Dy57 N142 2.9115 . ? 
Dy57 Dy67 3.8931 . ? 
Dy58 O411 2.2886 . ? 
Dy58 O361 2.3440 . ? 
Dy58 O336 2.3724 . ? 
Dy58 O481 2.3763 . ? 
Dy58 O316 2.3854 . ? 
Dy58 O397 2.3911 . ? 
Dy58 O539 2.4618 . ? 
Dy58 O334 2.4744 . ? 
Dy58 C657 2.6752 . ? 
Dy58 O491 2.7594 . ? 
Dy58 N155 2.8475 . ? 
Dy58 N141 2.9445 . ? 
Dy59 O285 2.3036 . ? 
Dy59 O412 2.3725 . ? 
Dy59 O288 2.3773 . ? 
Dy59 O414 2.3896 . ? 
Dy59 O299 2.4011 . ? 
Dy59 O466 2.4031 . ? 
Dy59 O301 2.4527 . ? 
Dy59 O340 2.4666 . ? 
Dy59 N151 2.8305 . ? 
Dy59 O355 2.9054 . ? 
Dy59 Dy71 3.8885 . ? 
Dy59 Dy68 3.9096 . ? 
Dy60 O290 2.2576 . ? 
Dy60 O407 2.3090 . ? 
Dy60 O538 2.3270 . ? 
Dy60 O321 2.3804 . ? 
Dy60 O362 2.3837 . ? 
Dy60 O419 2.4003 . ? 
Dy60 O457 2.4034 . ? 
Dy60 O389 2.4612 . ? 
Dy60 Dy62 3.7513 . ? 
Dy60 Dy74 3.7787 . ? 
Dy60 Dy70 3.8939 . ? 
Dy61 O361 2.3524 . ? 
Dy61 O461 2.3542 . ? 
Dy61 O535 2.3642 . ? 
Dy61 O396 2.3698 . ? 
Dy61 O359 2.3971 . ? 
Dy61 O319 2.4080 . ? 
Dy61 O470 2.4176 . ? 
Dy61 O481 2.4181 . ? 
Dy61 Dy72 3.7278 . ? 
Dy63 O404 2.2787 . ? 
Dy63 O440 2.3064 . ? 
Dy63 O399 2.3093 . ? 
Dy63 O522 2.3685 . ? 
Dy63 O501 2.3754 . ? 
Dy63 O373 2.3784 . ? 
Dy63 O526 2.4084 . ? 
Dy63 O524 2.4282 . ? 
Dy63 Dy71 3.7134 . ? 
Dy63 Dy67 3.7432 . ? 
Dy63 Dy65 3.8823 . ? 
Dy63 Dy69 3.9000 . ? 
Dy64 O356 2.2899 . ? 
Dy64 O505 2.3106 . ? 
Dy64 O525 2.3326 . ? 
Dy64 O529 2.3702 . ? 
Dy64 O332 2.3826 . ? 
Dy64 O406 2.3923 . ? 
Dy64 O416 2.4109 . ? 
Dy64 O394 2.4880 . ? 
Dy64 Dy77 3.7449 . ? 
Dy64 Dy76 3.7804 . ? 
Dy64 Dy78 3.8559 . ? 
Dy65 O432 2.3096 . ? 
Dy65 O437 2.3099 . ? 
Dy65 O427 2.3606 . ? 
Dy65 O446 2.3622 . ? 
Dy65 O524 2.3675 . ? 
Dy65 O506 2.3762 . ? 
Dy65 O399 2.4299 . ? 
Dy65 O502 2.4503 . ? 
Dy65 N150 2.9115 . ? 
Dy65 Dy77 3.9379 . ? 
Dy66 O293 2.1847 . ? 
Dy66 O365 2.3578 . ? 
Dy66 O295 2.3821 . ? 
Dy66 O419 2.3882 . ? 
Dy66 O407 2.3987 . ? 
Dy66 O294 2.4099 . ? 
Dy66 O434 2.4589 . ? 
Dy66 O289 2.4660 . ? 
Dy66 C686 2.5706 . ? 
Dy66 N148 2.8259 . ? 
Dy66 Dy70 3.8955 . ? 
Dy67 O354 2.2919 . ? 
Dy67 O440 2.3245 . ? 
Dy67 O335 2.3376 . ? 
Dy67 O360 2.3687 . ? 
Dy67 O381 2.3948 . ? 
Dy67 O494 2.4019 . ? 
Dy67 O522 2.4198 . ? 
Dy67 O402 2.4403 . ? 
Dy67 Dy71 3.8016 . ? 
Dy67 Dy69 3.8381 . ? 
Dy68 O476 2.3273 . ? 
Dy68 O412 2.3582 . ? 
Dy68 O423 2.3767 . ? 
Dy68 O531 2.4020 . ? 
Dy68 O376 2.4131 . ? 
Dy68 O414 2.4150 . ? 
Dy68 O510 2.4282 . ? 
Dy68 O478 2.4320 . ? 
Dy68 Dy75 3.7412 . ? 
Dy68 Dy70 3.7964 . ? 
Dy68 Dy71 3.8958 . ? 
Dy69 O330 2.3443 . ? 
Dy69 O486 2.3667 . ? 
Dy69 O381 2.3689 . ? 
Dy69 O501 2.3771 . ? 
Dy69 O329 2.3771 . ? 
Dy69 O328 2.3997 . ? 
Dy69 O522 2.4070 . ? 
Dy69 N157 2.6508 . ? 
Dy69 Dy71 3.7877 . ? 
Dy70 O423 2.2975 . ? 
Dy70 O365 2.3469 . ? 
Dy70 O367 2.3473 . ? 
Dy70 O478 2.3687 . ? 
Dy70 O460 2.3767 . ? 
Dy70 O419 2.3901 . ? 
Dy70 O390 2.3902 . ? 
Dy70 O389 2.4028 . ? 
Dy70 Dy75 3.7282 . ? 
Dy71 O425 2.2985 . ? 
Dy71 O466 2.3023 . ? 
Dy71 O440 2.3560 . ? 
Dy71 O381 2.3582 . ? 
Dy71 O501 2.3771 . ? 
Dy71 O531 2.4013 . ? 
Dy71 O414 2.4105 . ? 
Dy71 O428 2.4522 . ? 
Dy72 O470 2.3014 . ? 
Dy72 O375 2.3409 . ? 
Dy72 O303 2.3449 . ? 
Dy72 O461 2.3499 . ? 
Dy72 O340 2.3685 . ? 
Dy72 O305 2.3693 . ? 
Dy72 O434 2.3702 . ? 
Dy72 O355 2.4502 . ? 
Dy73 O323 2.2799 . ? 
Dy73 O383 2.3255 . ? 
Dy73 O433 2.3677 . ? 
Dy73 O318 2.3719 . ? 
Dy73 O346 2.3774 . ? 
Dy73 O348 2.3914 . ? 
Dy73 O409 2.3926 . ? 
Dy73 O298 2.5724 . ? 
Dy73 O442 2.7568 . ? 
Dy73 C705 2.8371 . ? 
Dy73 N144 2.9157 . ? 
Dy73 N149 2.9321 . ? 
Dy74 O338 2.2959 . ? 
Dy74 O320 2.3029 . ? 
Dy74 O397 2.3399 . ? 
Dy74 O457 2.3626 . ? 
Dy74 O538 2.3679 . ? 
Dy74 O535 2.4017 . ? 
Dy74 O388 2.4180 . ? 
Dy74 O481 2.4213 . ? 
Dy74 Dy62 3.7975 . ? 
Dy75 O478 2.3258 . ? 
Dy75 O476 2.3395 . ? 
Dy75 O366 2.3491 . ? 
Dy75 O367 2.3501 . ? 
Dy75 O502 2.3610 . ? 
Dy75 O400 2.3737 . ? 
Dy75 O409 2.4195 . ? 
Dy75 O442 2.4741 . ? 
Dy76 O406 2.3177 . ? 
Dy76 O529 2.3358 . ? 
Dy76 O417 2.3364 . ? 
Dy76 O383 2.3487 . ? 
Dy76 O472 2.3739 . ? 
Dy76 O341 2.3866 . ? 
Dy76 O433 2.4033 . ? 
Dy76 O534 2.4061 . ? 
Dy76 Dy78 3.7232 . ? 
Dy76 Dy77 3.8008 . ? 
Dy77 O477 2.3067 . ? 
Dy77 O406 2.3352 . ? 
Dy77 O472 2.3716 . ? 
Dy77 O505 2.3775 . ? 
Dy77 O526 2.3848 . ? 
Dy77 O524 2.3995 . ? 
Dy77 O506 2.4041 . ? 
Dy77 O474 2.4393 . ? 
Dy77 Dy78 3.7196 . ? 
Dy78 O452 2.2881 . ? 
Dy78 O539 2.3484 . ? 
Dy78 O505 2.3499 . ? 
Dy78 O529 2.3545 . ? 
Dy78 O497 2.3575 . ? 
Dy78 O472 2.3634 . ? 
Dy78 O415 2.3824 . ? 
Dy78 O491 2.4910 . ? 
Dy79 O324 2.1981 . ? 
Dy79 O449 2.2721 . ? 
Dy79 O435 2.3286 . ? 
Dy79 O469 2.3660 . ? 
Dy79 O528 2.3699 . ? 
Dy79 O408 2.3931 . ? 
Dy79 O500 2.4240 . ? 
Dy79 O379 2.6060 . ? 
Dy79 N158 2.8352 . ? 
Dy79 N159 2.8686 . ? 
Dy79 Dy88 3.8567 . ? 
Dy79 Dy90 3.8972 . ? 
Dy80 O422 2.3079 . ? 
Dy80 O308 2.3298 . ? 
Dy80 O507 2.3348 . ? 
Dy80 O459 2.3696 . ? 
Dy80 O464 2.3704 . ? 
Dy80 O498 2.3894 . ? 
Dy80 O349 2.3949 . ? 
Dy80 O378 2.4737 . ? 
Dy80 Dy88 3.7551 . ? 
Dy80 Dy81 3.7620 . ? 
Dy80 Dy93 3.9480 . ? 
Dy81 O498 2.3527 . ? 
Dy81 O489 2.3571 . ? 
Dy81 O533 2.3720 . ? 
Dy81 O459 2.3819 . ? 
Dy81 O468 2.4030 . ? 
Dy81 O509 2.4082 . ? 
Dy81 O410 2.4082 . ? 
Dy81 O508 2.4181 . ? 
Dy81 Dy93 3.7243 . ? 
Dy81 Dy88 3.8192 . ? 
Dy81 Dy95 3.8704 . ? 
Dy82 O492 2.3287 . ? 
Dy82 O372 2.3287 . ? 
Dy82 O513 2.3914 . ? 
Dy82 O413 2.3952 . ? 
Dy82 O532 2.4032 . ? 
Dy82 O456 2.4074 . ? 
Dy82 O475 2.4120 . ? 
Dy82 O391 2.4195 . ? 
Dy82 Dy96 3.7198 . ? 
Dy82 Dy83 3.8166 . ? 
Dy83 O343 2.2627 . ? 
Dy83 O512 2.3516 . ? 
Dy83 O358 2.3574 . ? 
Dy83 O398 2.3719 . ? 
Dy83 O385 2.3895 . ? 
Dy83 O492 2.3940 . ? 
Dy83 O513 2.4571 . ? 
Dy83 O304 2.4984 . ? 
Dy83 Dy96 3.8883 . ? 
Dy84 O311 2.2453 . ? 
Dy84 O309 2.2732 . ? 
Dy84 O456 2.3783 . ? 
Dy84 O532 2.3809 . ? 
Dy84 O495 2.3872 . ? 
Dy84 O377 2.4487 . ? 
Dy84 O325 2.4575 . ? 
Dy84 O438 2.4767 . ? 
Dy84 C724 2.7673 . ? 
Dy84 N145 2.9061 . ? 
Dy85 O322 2.2400 . ? 
Dy85 O371 2.2716 . ? 
Dy85 O445 2.2892 . ? 
Dy85 O405 2.3180 . ? 
Dy85 O496 2.3584 . ? 
Dy85 O516 2.3714 . ? 
Dy85 O488 2.5061 . ? 
Dy85 O493 2.5268 . ? 
Dy85 N146 2.8095 . ? 
Dy85 N153 2.9478 . ? 
Dy85 Dy94 3.8590 . ? 
Dy85 Dy98 3.9077(9) . ? 
Dy86 O353 2.2875 . ? 
Dy86 O439 2.3372 . ? 
Dy86 O484 2.3381 . ? 
Dy86 O447 2.3532 . ? 
Dy86 O518 2.3761 . ? 
Dy86 O444 2.3937 . ? 
Dy86 O503 2.3958 . ? 
Dy86 N152 2.5957 . ? 
Dy86 Dy90 3.7423 . ? 
Dy87 O483 2.2785 . ? 
Dy87 O443 2.3181 . ? 
Dy87 O508 2.3368 . ? 
Dy87 O468 2.3491 . ? 
Dy87 O482 2.3698 . ? 
Dy87 O384 2.4257 . ? 
Dy87 O511 2.4431 . ? 
Dy87 O521 2.4614 . ? 
Dy87 N156 2.8187 . ? 
Dy87 C473 2.8607 . ? 
Dy87 Dy95 3.8278 . ? 
Dy88 O403 2.3074 . ? 
Dy88 O450 2.3447 . ? 
Dy88 O459 2.3461 . ? 
Dy88 O435 2.3566 . ? 
Dy88 O507 2.3708 . ? 
Dy88 O533 2.3846 . ? 
Dy88 O528 2.4123 . ? 
Dy88 O420 2.4180 . ? 
Dy88 Dy93 3.6697 . ? 
Dy89 O337 2.3107 . ? 
Dy89 O430 2.3455 . ? 
Dy89 O344 2.3519 . ? 
Dy89 O473 2.3942 . ? 
Dy89 O296 2.4114 . ? 
Dy89 O357 2.4235 . ? 
Dy89 O485 2.4513 . ? 
Dy89 O517 2.4856 . ? 
Dy89 O493 2.7969 . ? 
Dy89 N154 2.9170 . ? 
Dy89 Dy97 3.9921 . ? 
Dy90 O469 2.3305 . ? 
Dy90 O503 2.3341 . ? 
Dy90 O530 2.3447 . ? 
Dy90 O518 2.3827 . ? 
Dy90 O514 2.3867 . ? 
Dy90 O450 2.3965 . ? 
Dy90 O528 2.4071 . ? 
Dy90 O490 2.4082 . ? 
Dy91 O313 2.3088 . ? 
Dy91 O480 2.3242 . ? 
Dy91 O326 2.3529 . ? 
Dy91 O380 2.3532 . ? 
Dy91 O401 2.3585 . ? 
Dy91 O418 2.4100 . ? 
Dy91 O424 2.4614 . ? 
Dy91 O519 2.4669 . ? 
Dy91 N147 2.7718 . ? 
Dy91 C564 2.7744 . ? 
Dy92 O540 2.3192 . ? 
Dy92 O350 2.3289 . ? 
Dy92 O382 2.3515 . ? 
Dy92 O527 2.3656 . ? 
Dy92 O521 2.3685 . ? 
Dy92 O500 2.3760 . ? 
Dy92 O523 2.3926 . ? 
Dy92 O379 2.4774 . ? 
Dy92 Dy98 3.7043(10) . ? 
Dy92 Dy97 3.7882 . ? 
Dy93 O369 2.2809 . ? 
Dy93 O533 2.3420 . ? 
Dy93 O387 2.3679 . ? 
Dy93 O438 2.3700 . ? 
Dy93 O498 2.3815 . ? 
Dy93 O519 2.3987 . ? 
Dy93 O507 2.3997 . ? 
Dy93 O331 2.4528 . ? 
Dy94 O496 2.3326 . ? 
Dy94 O451 2.3362 . ? 
Dy94 O454 2.3429 . ? 
Dy94 O463 2.3688 . ? 
Dy94 O504 2.3801 . ? 
Dy94 O541 2.4205 . ? 
Dy94 O516 2.4268 . ? 
Dy94 O520 2.4341 . ? 
Dy94 Dy95 3.8109 . ? 
Dy94 Dy99 3.8340(10) . ? 
Dy95 O482 2.2827 . ? 
Dy95 O458 2.3403 . ? 
Dy95 O541 2.3421 . ? 
Dy95 O454 2.3457 . ? 
Dy95 O509 2.3521 . ? 
Dy95 O426 2.3523 . ? 
Dy95 O429 2.3592 . ? 
Dy95 O508 2.4041 . ? 
Dy95 Dy99 3.7407(10) . ? 
Dy96 O386 2.2694 . ? 
Dy96 O513 2.3245 . ? 
Dy96 O517 2.3255 . ? 
Dy96 O393 2.3357 . ? 
Dy96 O413 2.3486 . ? 
Dy96 O488 2.3551 . ? 
Dy96 O512 2.3650 . ? 
Dy96 O493 2.8212 . ? 
Dy97 O382 2.3509 . ? 
Dy97 O536 2.3515 . ? 
Dy97 O479 2.3612 . ? 
Dy97 O430 2.3634 . ? 
Dy97 O462 2.3716 . ? 
Dy97 O540 2.4006 . ? 
Dy97 O448 2.4021 . ? 
Dy97 O473 2.4698 . ? 
Dy97 Dy98 3.8401(10) . ? 
Dy98 O537 2.3300(10) . ? 
Dy98 O536 2.3529(10) . ? 
Dy98 O523 2.3551(9) . ? 
Dy98 O520 2.3629(9) . ? 
Dy98 O445 2.3715(10) . ? 
Dy98 O516 2.3777(9) . ? 
Dy98 O540 2.4197(10) . ? 
Dy98 O499 2.4332(11) . ? 
Dy99 O429 2.3528(10) . ? 
Dy99 O504 2.3586(10) . ? 
Dy99 O487 2.3797(10) . ? 
Dy99 O455 2.3846(11) . ? 
Dy99 O541 2.4086(10) . ? 
Dy99 O352 2.4466(10) . ? 
Dy99 O421 2.4679(9) . ? 
Dy99 O368 2.4686(10) . ? 
O253 N74 1.2852 . ? 
O255 N77 1.3129 . ? 
O258 N62 1.3128 . ? 
O260 N73 1.3062 . ? 
O261 N75 1.2733 . ? 
O263 N70 1.3173 . ? 
O267 C262 1.2791 . ? 
O268 C106 1.2348 . ? 
O269 N61 1.2741 . ? 
O270 N66 1.2580 . ? 
O271 N77 1.2928 . ? 
O276 C734 1.2478 . ? 
O284 C540 1.4459 . ? 
O285 C751 1.2076 . ? 
O287 C658 1.4249 . ? 
O288 C392 1.5093 . ? 
O289 C686 1.3157 . ? 
O290 C658 1.1809 . ? 
O291 C558 1.2181 . ? 
O293 C687 1.3491 . ? 
O295 C686 1.1979 . ? 
O298 C705 1.2293 . ? 
O299 C392 1.6098 . ? 
O302 C680 1.2855 . ? 
O303 C687 1.2653 . ? 
O305 C751 1.3037 . ? 
O306 C519 1.3344 . ? 
O307 C521 1.2510 . ? 
O308 C711 1.3572 . ? 
O309 C499 1.3415 . ? 
O311 C599 1.2920 . ? 
O314 C680 1.1714 . ? 
O316 C657 1.2608 . ? 
O319 C548 1.2511 . ? 
O320 C519 1.2712 . ? 
O321 C652 1.2441 . ? 
O322 C540 1.1866 . ? 
O323 C562 1.2548 . ? 
O324 C605 1.2655 . ? 
O325 C724 1.3574 . ? 
O326 C618 1.2130 . ? 
O327 C734 1.2413 . ? 
O330 C590 1.2907 . ? 
O331 N140 1.3106 . ? 
O333 C542 1.2514 . ? 
O334 C657 1.2618 . ? 
O335 C542 1.2602 . ? 
O337 C573 1.1952 . ? 
O338 C548 1.2280 . ? 
O340 N151 1.3061 . ? 
O341 C596 1.2211 . ? 
O342 C596 1.2676 . ? 
O342 Dy62 2.3364 . ? 
O343 C748 1.1597 . ? 
O345 C558 1.2719 . ? 
O346 N144 1.3296 . ? 
O346 Dy62 2.3492 . ? 
O347 C582 1.2885 . ? 
O348 C705 1.2558 . ? 
O350 C480 1.2787 . ? 
O351 C580 1.2574 . ? 
O353 C539 1.3190 . ? 
O354 N142 1.3197 . ? 
O355 N143 1.2809 . ? 
O356 C637 1.2888 . ? 
O358 C602 1.2015 . ? 
O360 C717 1.3125 . ? 
O361 N141 1.3105 . ? 
O362 Dy62 2.3701 . ? 
O363 C717 1.2576 . ? 
O364 C545 1.2548 . ? 
O365 N143 1.3521 . ? 
O366 C562 1.2502 . ? 
O369 C618 1.2533 . ? 
O370 C545 1.2559 . ? 
O371 C624 1.2746 . ? 
O372 C602 1.2470 . ? 
O374 C484 1.2402 . ? 
O376 C521 1.3210 . ? 
O377 C724 1.3199 . ? 
O379 N159 1.2953 . ? 
O380 N140 1.2751 . ? 
O383 N149 1.3036 . ? 
O384 C473 1.2147 . ? 
O385 C707 1.2813 . ? 
O386 C573 1.2882 . ? 
O387 C599 1.2206 . ? 
O388 Dy62 2.3312 . ? 
O389 N144 1.2086 . ? 
O390 C652 1.2690 . ? 
O391 C641 1.1835 . ? 
O392 C707 1.2519 . ? 
O393 C471 1.2507 . ? 
O395 C619 1.2303 . ? 
O397 N155 1.2348 . ? 
O399 N150 1.3354 . ? 
O400 C647 1.2208 . ? 
O401 N147 1.2923 . ? 
O403 C640 1.2840 . ? 
O404 C492 1.2145 . ? 
O405 C471 1.2399 . ? 
O407 N148 1.3543 . ? 
O409 N144 1.2969 . ? 
O410 C477 1.2716 . ? 
O411 C476 1.2640 . ? 
O412 N143 1.3130 . ? 
O415 C476 1.2441 . ? 
O417 C637 1.2402 . ? 
O418 C564 1.2755 . ? 
O420 C615 1.2358 . ? 
O422 C644 1.2985 . ? 
O424 C564 1.2492 . ? 
O425 C590 1.2457 . ? 
O426 C477 1.2350 . ? 
O428 C482 1.2668 . ? 
O430 N146 1.2921 . ? 
O431 C474 1.2178 . ? 
O432 C647 1.2494 . ? 
O433 Dy62 2.4427 . ? 
O434 N148 1.2505 . ? 
O435 N159 1.3041 . ? 
O437 C595 1.2649 . ? 
O438 N145 1.3125 . ? 
O441 C641 1.2758 . ? 
O442 N149 1.2631 . ? 
O445 N146 1.3196 . ? 
O447 C619 1.2393 . ? 
O448 N158 1.2845 . ? 
O449 C480 1.2462 . ? 
O450 N147 1.3397 . ? 
O451 C483 1.3351 . ? 
O452 C582 1.2304 . ? 
O453 C474 1.2711 . ? 
O456 N140 1.3326 . ? 
O458 C495 1.2663 . ? 
O460 C580 1.2403 . ? 
O462 C484 1.2717 . ? 
O463 C624 1.2587 . ? 
O464 C640 1.2609 . ? 
O465 C489 1.2536 . ? 
O466 N151 1.2779 . ? 
O467 N141 1.3412 . ? 
O468 N159 1.3297 . ? 
O469 N158 1.2867 . ? 
O471 C491 1.2352 . ? 
O474 C492 1.3001 . ? 
O475 N153 1.2318 . ? 
O477 C614 1.2533 . ? 
O479 C491 1.2484 . ? 
O482 N156 1.2915 . ? 
O483 C494 1.2613 . ? 
O484 C642 1.2197 . ? 
O485 N154 1.3014 . ? 
O486 C488 1.2504 . ? 
O487 C495 1.2227 . ? 
O488 N153 1.3238 . ? 
O489 C644 1.2440 . ? 
O490 C642 1.2637 . ? 
O491 N141 1.2621 . ? 
O493 N146 1.3411 . ? 
O494 N151 1.3270 . ? 
O495 N145 1.3089 . ? 
O496 N153 1.3036 . ? 
O497 N142 1.3193 . ? 
O499 C483 1.2350 . ? 
O500 N158 1.3014 . ? 
O502 N150 1.3199 . ? 
O506 N149 1.3577 . ? 
O509 N145 1.2478 . ? 
O510 C482 1.2422 . ? 
O511 C473 1.2856 . ? 
O514 C615 1.2513 . ? 
O515 N154 1.2324 . ? 
O517 N154 1.2989 . ? 
O519 N147 1.2781 . ? 
O520 N156 1.2839 . ? 
O521 N156 1.3181 . ? 
O525 C614 1.2581 . ? 
O526 N142 1.2538 . ? 
O527 C494 1.2386 . ? 
O531 N150 1.2660 . ? 
O534 N155 1.2875 . ? 
O534 Dy62 2.3962 . ? 
O535 N148 1.3231 . ? 
O537 C489 1.2849 . ? 
O538 Dy62 2.3563 . ? 
O539 N155 1.3093 . ? 
O543 C124 1.2182 . ? 
O277 C595 1.2480 . ? 
O278 C488 1.3189 . ? 
O279 C605 1.2972 . ? 
O280 C748 1.3201 . ? 
O281 C711 1.1814 . ? 
O282 C499 1.2955 . ? 
O283 C539 1.2482 . ? 
O542 C763 1.2516 . ? 
O544 C757 1.2373 . ? 
O545 C763 1.2332 . ? 
O546 C757 1.2907 . ? 
O5 C223 1.3109 . ? 
O6 C133 1.2698 . ? 
O7 C263 1.2363 . ? 
O8 C338 1.2745 . ? 
O9 C379 1.3052 . ? 
O10 C164 1.3085 . ? 
O11 C289 1.2646 . ? 
C4 N3 1.3799 . ? 
C4 C43 1.3857 . ? 
C5 C14 1.3614 . ? 
C5 C69 1.3954 . ? 
C14 C43 1.3860 . ? 
C14 C151 1.6474 . ? 
C15 C19 1.4025 . ? 
C15 N2 1.4079 . ? 
C16 C17 1.3704 . ? 
C16 N2 1.3926 . ? 
C17 C20 1.3740 . ? 
C19 C20 1.3907 . ? 
C20 C214 1.5238 . ? 
C22 N5 1.4086 . ? 
C22 C96 1.8071 . ? 
C23 C31 1.3796 . ? 
C23 N161 1.4009 . ? 
C24 N8 1.3776 . ? 
C24 C84 1.3860 . ? 
C25 N22 1.2280 . ? 
C25 C70 1.4590 . ? 
C26 N14 1.4385 . ? 
C26 C52 1.6852 . ? 
C27 N10 1.4558 . ? 
C27 C91 1.6586 . ? 
C28 C321 1.3696 . ? 
C28 C73 1.3998 . ? 
C30 N4 1.3201 . ? 
C30 C42 1.6820 . ? 
C31 C74 1.3894 . ? 
C32 N8 1.3807 . ? 
C32 C86 1.4055 . ? 
C33 N9 1.4896 . ? 
C33 C79 1.6047 . ? 
C34 C74 1.3779 . ? 
C34 C764 1.3796 . ? 
C35 N54 1.3602 . ? 
C35 C317 1.4018 . ? 
C36 C37 1.4282 . ? 
C36 C163 1.5100 . ? 
C37 N7 1.3564 . ? 
C38 N11 1.3703 . ? 
C38 C72 1.3810 . ? 
C39 C153 1.4463 . ? 
C39 C60 1.4831 . ? 
C40 N15 1.4238 . ? 
C40 C301 1.5041 . ? 
C41 C92 1.4398 . ? 
C41 N7 1.6297 . ? 
C42 C369 1.5239 . ? 
C44 C50 1.5185 . ? 
C44 N18 1.5226 . ? 
C45 C321 1.3708 . ? 
C45 C47 1.4123 . ? 
C46 C65 1.4656 . ? 
C46 C211 1.5190 . ? 
C47 N16 1.3773 . ? 
C49 N19 1.3981 . ? 
C49 C319 1.4138 . ? 
C50 C351 1.3027 . ? 
C51 N20 1.2837 . ? 
C51 C331 1.4155 . ? 
C52 C197 1.3364 . ? 
C53 C356 1.3841 . ? 
C53 N17 1.4146 . ? 
C54 N18 1.2791 . ? 
C54 C77 1.5448 . ? 
C55 N20 1.2850 . ? 
C55 C371 1.5412 . ? 
C56 N4 1.3087 . ? 
C56 C328 1.5268 . ? 
C57 C87 1.4389 . ? 
C57 N58 1.4656 . ? 
C58 N19 1.3563 . ? 
C58 C300 1.3632 . ? 
C59 N13 1.3980 . ? 
C59 C303 1.4522 . ? 
C60 N21 1.3098 . ? 
C61 N13 1.3992 . ? 
C61 C353 1.4109 . ? 
C62 C143 1.4444 . ? 
C62 C48 1.4487 . ? 
C63 N11 1.3738 . ? 
C63 C306 1.4380 . ? 
C64 C79 1.3236 . ? 
C64 C82 1.4450 . ? 
C64 C90 1.4583 . ? 
C65 N22 1.3786 . ? 
C66 N36 1.1956 . ? 
C66 C162 1.4789 . ? 
C67 N56 1.3360 . ? 
C67 C378 1.4679 . ? 
C68 N6 1.3484 . ? 
C68 C326 1.4974 . ? 
C69 N3 1.3636 . ? 
C70 C211 1.4816 . ? 
C71 N12 1.3076 . ? 
C71 C307 1.5769 . ? 
C72 C312 1.3608 . ? 
C73 N16 1.3687 . ? 
C74 C346 1.6573 . ? 
C75 N10 1.4732 . ? 
C75 C98 1.8039 . ? 
C76 N12 1.3769 . ? 
C76 C309 1.5216 . ? 
C77 C351 1.5427 . ? 
C78 C83 1.3488 . ? 
C78 C359 1.4657 . ? 
C80 N17 1.2725 . ? 
C80 C184 1.4406 . ? 
C81 N6 1.3378 . ? 
C81 C376 1.5243 . ? 
C83 N15 1.3540 . ? 
C84 C343 1.3609 . ? 
C85 N21 1.3161 . ? 
C85 C341 1.4963 . ? 
C86 C343 1.3846 . ? 
C87 C119 1.3087 . ? 
C88 N53 1.3954 . ? 
C88 C304 1.4627 . ? 
C89 N33 1.3906 . ? 
C89 C339 1.4504 . ? 
C90 C95 1.3768 . ? 
C91 C308 1.5835 . ? 
C92 C163 1.3899 . ? 
C93 N54 1.3599 . ? 
C93 C358 1.4037 . ? 
C94 N55 1.3938 . ? 
C94 C313 1.4815 . ? 
C95 N9 1.4402 . ? 
C96 C143 1.4876 . ? 
C97 N34 1.3512 . ? 
C97 C199 1.4754 . ? 
C98 C308 1.4506 . ? 
C99 N59 1.3431 . ? 
C99 C366 1.4718 . ? 
C100 N32 1.4196 . ? 
C100 C340 1.4510 . ? 
C101 N35 1.3038 . ? 
C101 C154 1.3902 . ? 
C102 C103 1.5374 . ? 
C103 C375 1.4227 . ? 
C103 C227 1.4331 . ? 
C104 N29 1.3219 . ? 
C104 C122 1.4487 . ? 
C105 C135 1.5005 . ? 
C106 C131 1.5066 . ? 
C107 C116 1.5379 . ? 
C108 C231 1.5127 . ? 
C109 C126 1.5321 . ? 
C110 C135 1.3534 . ? 
C110 C125 1.4263 . ? 
C111 C253 1.5140 . ? 
C112 C283 1.5291 . ? 
C113 C268 1.4090 . ? 
C113 C299 1.4166 . ? 
C113 C293 1.4744 . ? 
C114 C181 1.4251 . ? 
C114 C277 1.4354 . ? 
C115 C295 1.5858 . ? 
C116 C296 1.3463 . ? 
C116 C266 1.3660 . ? 
C117 C284 1.5388 . ? 
C118 C274 1.3487 . ? 
C118 C201 1.4475 . ? 
C119 C348 1.3710 . ? 
C119 C269 1.5744 . ? 
C120 C135 1.3881 . ? 
C120 C179 1.4074 . ? 
C121 C286 1.4474 . ? 
C121 C292 1.4773 . ? 
C121 C289 1.4907 . ? 
C122 C131 1.3930 . ? 
C123 C259 1.5082 . ? 
C124 C277 1.4773 . ? 
C125 N79 1.3222 . ? 
C126 C251 1.3836 . ? 
C126 C255 1.3865 . ? 
C127 C205 1.5572 . ? 
C128 C221 1.3337 . ? 
C128 C290 1.4268 . ? 
C128 C133 1.4963 . ? 
C129 C297 1.5303 . ? 
C130 C280 1.4580 . ? 
C131 C244 1.4079 . ? 
C132 C278 1.4616 . ? 
C134 C148 1.3346 . ? 
C134 C176 1.4100 . ? 
C134 C285 1.5138 . ? 
C136 C239 1.4135 . ? 
C136 C316 1.4468 . ? 
C137 C213 1.3718 . ? 
C137 C281 1.4386 . ? 
C138 C238 1.3848 . ? 
C138 C322 1.4366 . ? 
C139 C246 1.2981 . ? 
C139 C323 1.4831 . ? 
C140 C246 1.4255 . ? 
C140 C318 1.5046 . ? 
C141 C364 1.4328 . ? 
C141 C275 1.4534 . ? 
C142 C193 1.3302 . ? 
C142 C365 1.4176 . ? 
C143 C245 1.6408 . ? 
C144 C274 1.4417 . ? 
C144 C320 1.4524 . ? 
C145 C192 1.4085 . ? 
C145 C159 1.4210 . ? 
C146 C310 1.5004 . ? 
C147 C360 1.3873 . ? 
C147 C188 1.4333 . ? 
C148 C175 1.4078 . ? 
C149 C283 1.3754 . ? 
C149 C354 1.4572 . ? 
C150 N52 1.3368 . ? 
C150 C251 1.4763 . ? 
C152 N50 1.4076 . ? 
C152 C191 1.4321 . ? 
C153 C341 1.3266 . ? 
C153 C228 1.4867 . ? 
C154 C222 1.4111 . ? 
C155 C344 1.4165 . ? 
C155 C333 1.4445 . ? 
C155 C243 1.5913 . ? 
C156 N31 1.3917 . ? 
C156 C227 1.4026 . ? 
C157 N46 1.2046 . ? 
C157 C247 1.3564 . ? 
C158 C231 1.3862 . ? 
C158 C216 1.4214 . ? 
C159 N32 1.2685 . ? 
C160 N47 1.3058 . ? 
C160 C215 1.4161 . ? 
C161 C253 1.3998 . ? 
C161 C352 1.4356 . ? 
C162 C196 1.4658 . ? 
C163 C165 1.5332 . ? 
C164 C359 1.4895 . ? 
C166 C210 1.5273 . ? 
C167 C335 1.3537 . ? 
C167 C304 1.3793 . ? 
C167 C203 1.5917 . ? 
C168 N39 1.3440 . ? 
C168 C187 1.4316 . ? 
C169 N68 1.3422 . ? 
C169 C182 1.3985 . ? 
C170 N42 1.3197 . ? 
C170 C236 1.4273 . ? 
C171 C326 1.3366 . ? 
C171 C376 1.4378 . ? 
C171 C263 1.5301 . ? 
C172 C283 1.3801 . ? 
C172 C314 1.5281 . ? 
C173 C303 1.3339 . ? 
C173 C353 1.3876 . ? 
C173 C272 1.5507 . ? 
C174 N23 1.3195 . ? 
C174 C290 1.4428 . ? 
C175 N37 1.3433 . ? 
C176 C342 1.4399 . ? 
C177 N28 1.3160 . ? 
C177 C186 1.4183 . ? 
C178 C246 1.5731 . ? 
C179 N79 1.4106 . ? 
C180 C343 1.5396 . ? 
C181 N44 1.3095 . ? 
C182 C248 1.4145 2_65: ? 
C183 C257 1.4749 . ? 
C184 C204 1.3659 . ? 
C185 N25 1.3782 . ? 
C185 C296 1.4193 . ? 
C186 C284 1.3724 . ? 
C187 C208 1.3609 . ? 
C188 C215 1.3619 . ? 
C188 C276 1.5173 . ? 
C189 C280 1.3733 . ? 
C189 C315 1.5560 . ? 
C190 C192 1.5294 . ? 
C191 C239 1.3002 . ? 
C192 C340 1.4045 . ? 
C193 C313 1.3448 . ? 
C193 C327 1.5499 . ? 
C194 N30 1.3557 . ? 
C194 C226 1.3971 . ? 
C195 C230 1.3648 . ? 
C195 N51 1.3829 . ? 
C196 C363 1.3846 . ? 
C196 C288 1.5246 . ? 
C197 C349 1.3547 . ? 
C197 C270 1.4796 . ? 
C198 C254 1.5150 . ? 
C199 C280 1.4425 . ? 
C200 N25 1.3455 . ? 
C200 C266 1.4299 . ? 
C201 N45 1.3059 . ? 
C381 N26 1.3888 . ? 
C381 C207 1.3958 . ? 
C204 C356 1.3861 . ? 
C204 C279 1.5242 . ? 
C205 C325 1.3037 . ? 
C205 C247 1.3467 . ? 
C206 N44 1.3725 . ? 
C206 C256 1.4719 . ? 
C207 C259 1.4292 . ? 
C208 C367 1.3558 . ? 
C208 C273 1.4742 . ? 
C209 N43 1.3550 . ? 
C209 C265 1.4589 . ? 
C210 C366 1.3409 . ? 
C210 C337 1.4686 . ? 
C211 C298 1.5233 . ? 
C212 N28 1.3450 . ? 
C212 C249 1.4105 . ? 
C213 N49 1.3988 . ? 
C216 N48 1.3030 . ? 
C217 C248 1.4529 . ? 
C218 N24 1.3334 . ? 
C218 C286 1.4252 . ? 
C219 N30 1.3201 . ? 
C219 C271 1.3993 . ? 
C220 N48 1.2873 . ? 
C220 C282 1.4734 . ? 
C221 C252 1.3885 . ? 
C222 C350 1.4428 . ? 
C222 C250 1.5160 . ? 
C223 C281 1.5351 . ? 
C224 C281 1.3976 . ? 
C224 C347 1.4562 . ? 
C225 C372 1.3832 . ? 
C225 C236 1.4123 . ? 
C225 C260 1.4700 . ? 
C226 C297 1.3887 . ? 
C229 C248 1.4102 2_65: ? 
C229 C234 1.4340 . ? 
C230 C232 1.4158 . ? 
C231 C282 1.4083 . ? 
C232 C242 1.3976 . ? 
C232 C262 1.4749 . ? 
C233 C275 1.5114 . ? 
C234 N68 1.3621 . ? 
C235 N26 1.3046 . ? 
C235 C294 1.3837 . ? 
C237 N51 1.3228 . ? 
C237 C242 1.3849 . ? 
C238 C339 1.3694 . ? 
C238 C373 1.5437 . ? 
C239 C240 1.5372 . ? 
C241 N29 1.3397 . ? 
C241 C244 1.3979 . ? 
C248 C229 1.4102 2_65: ? 
C248 C182 1.4145 2_65: ? 
C249 C284 1.4032 . ? 
C252 N23 1.3553 . ? 
C253 C265 1.3122 . ? 
C254 C319 1.3165 . ? 
C254 C300 1.4430 . ? 
C255 C261 1.4221 . ? 
C256 C277 1.4179 . ? 
C257 C371 1.3607 . ? 
C257 C331 1.4022 . ? 
C258 C308 1.5945 . ? 
C259 C294 1.4428 . ? 
C261 N52 1.3397 . ? 
C264 C361 1.3652 . ? 
C264 C278 1.3919 . ? 
C267 N27 1.3209 . ? 
C267 C299 1.4031 . ? 
C268 C291 1.4331 . ? 
C271 C297 1.3663 . ? 
C274 C287 1.5462 . ? 
C275 C378 1.3139 . ? 
C278 C368 1.3919 . ? 
C291 N27 1.3247 . ? 
C292 C370 1.3825 . ? 
C295 C358 1.3675 . ? 
C295 C317 1.3743 . ? 
C301 C359 1.3954 . ? 
C302 N58 1.3050 . ? 
C302 C348 1.4388 . ? 
C305 N53 1.4272 . ? 
C305 C335 1.5066 . ? 
C306 C312 1.3861 . ? 
C307 C310 1.3965 . ? 
C309 C310 1.4488 . ? 
C311 C321 1.6156 . ? 
C312 C379 1.4777 . ? 
C314 N38 1.3236 . ? 
C315 N34 1.3689 . ? 
C316 N50 1.3303 . ? 
C318 N57 1.3772 . ? 
C320 N45 1.3585 . ? 
C322 N33 1.4008 . ? 
C323 N57 1.3605 . ? 
C324 C368 1.3744 . ? 
C324 N41 1.3813 . ? 
C325 C330 1.7631 . ? 
C328 C369 1.2692 . ? 
C329 N39 1.3582 . ? 
C329 C367 1.4614 . ? 
C330 N46 1.2875 . ? 
C332 N14 1.4025 . ? 
C332 C349 1.4876 . ? 
C333 C345 1.5035 . ? 
C334 N35 1.3456 . ? 
C334 C350 1.4568 . ? 
C336 N59 1.2882 . ? 
C336 C337 1.5013 . ? 
C338 C351 1.5641 . ? 
C342 N37 1.2783 . ? 
C344 C357 1.4940 . ? 
C345 N40 1.2576 . ? 
C347 N49 1.2965 . ? 
C352 N43 1.3787 . ? 
C354 N38 1.3814 . ? 
C355 C369 1.6394 . ? 
C357 N40 1.3416 . ? 
C360 N47 1.4425 . ? 
C361 N41 1.3852 . ? 
C362 N31 1.3951 . ? 
C362 C375 1.4644 . ? 
C363 C377 1.5411 . ? 
C364 N56 1.2986 . ? 
C365 N55 1.3282 . ? 
C370 N24 1.3368 . ? 
C372 C374 1.4985 . ? 
C374 N42 1.3151 . ? 
C377 N36 1.2387 . ? 
C380 C410 1.6442 . ? 
C380 C384 1.6517 . ? 
C384 N80 1.4681 . ? 
C384 C387 2.0299 . ? 
C385 N81 1.3449 . ? 
C385 C383 1.6497 . ? 
C387 N80 1.0816 . ? 
C387 C413 1.4684 . ? 
C388 N81 1.5961 . ? 
C388 C418 1.7197 . ? 
C388 C434 2.0154 . ? 
C396 N84 1.2651 . ? 
C396 C433 1.4877 . ? 
C401 C664 1.3692 . ? 
C401 C421 1.5593 . ? 
C403 N97 1.3925 . ? 
C403 C414 1.4565 . ? 
C404 N83 1.3689 . ? 
C404 C419 1.3940 . ? 
C406 N83 1.3681 . ? 
C406 C425 1.4032 . ? 
C407 C467 1.1662 . ? 
C407 N85 1.6362 . ? 
C407 C500 1.9807 . ? 
C408 C443 1.3295 . ? 
C408 N92 1.4474 . ? 
C410 C413 1.4327 . ? 
C410 C751 1.6518 . ? 
C411 C419 1.3730 . ? 
C411 C425 1.3785 . ? 
C411 C657 1.6139 . ? 
C412 C737 1.3713 . ? 
C412 C436 1.4732 . ? 
C414 C667 1.4604 . ? 
C415 N94 1.3074 . ? 
C415 C659 1.4865 . ? 
C416 N91 1.5126 . ? 
C416 C665 1.7102 . ? 
C417 N86 1.3824 . ? 
C417 C459 1.3959 . ? 
C421 N95 1.3888 . ? 
C428 C546 1.4700 . ? 
C428 C448 1.5809 . ? 
C429 C696 1.4777 . ? 
C429 C451 1.5798 . ? 
C430 N93 1.2937 . ? 
C430 C543 1.4299 . ? 
C431 N90 1.4635 . ? 
C431 C689 1.6184 . ? 
C433 C715 1.5196 . ? 
C435 C466 1.4727 . ? 
C435 C458 1.4779 . ? 
C435 C658 1.7174 . ? 
C436 N94 1.5304 . ? 
C437 C703 1.4746 . ? 
C437 N97 1.5791 . ? 
C440 C432 1.4414 . ? 
C440 C389 1.4671 . ? 
C440 C542 1.7936 . ? 
C441 N86 1.3729 . ? 
C441 C682 1.3877 . ? 
C442 C729 1.4854 . ? 
C442 C629 1.5200 . ? 
C443 C713 1.3591 . ? 
C444 N96 1.2681 . ? 
C444 C683 1.4729 . ? 
C445 C704 1.3592 . ? 
C445 C465 1.4968 . ? 
C447 N92 1.2534 . ? 
C447 C456 1.5465 . ? 
C448 N131 1.2083 . ? 
C449 N89 1.6511 . ? 
C449 C458 1.6833 . ? 
C450 N93 1.3653 . ? 
C450 C718 1.3812 . ? 
C451 N100 1.3625 . ? 
C452 N89 1.4921 . ? 
C452 C466 1.5860 . ? 
C453 C512 1.3877 . ? 
C453 C464 1.5092 . ? 
C454 N132 1.2713 . ? 
C454 C732 1.3065 . ? 
C455 N99 1.3518 . ? 
C455 C517 1.4428 . ? 
C456 C713 1.3876 . ? 
C457 N84 1.4109 . ? 
C457 C712 1.6622 . ? 
C459 C721 1.3742 . ? 
C460 N122 1.2224 . ? 
C460 C706 1.4892 . ? 
C461 C741 1.5033 . ? 
C461 N100 1.5658 . ? 
C462 N130 1.3145 . ? 
C462 C509 1.4765 . ? 
C463 C535 1.3599 . ? 
C463 C716 1.4956 . ? 
C464 N91 1.3541 . ? 
C465 N99 1.2687 . ? 
C467 C500 1.3236 . ? 
C468 C636 1.3659 . ? 
C468 C490 1.3910 . ? 
C468 C483 1.5151 . ? 
C469 C577 1.3775 . ? 
C469 C743 1.4155 . ? 
C469 C615 1.5332 . ? 
C470 C727 1.3522 . ? 
C470 C529 1.4538 . ? 
C470 C641 1.5471 . ? 
C471 C627 1.4934 . ? 
C472 C598 1.3984 . ? 
C472 C613 1.4088 . ? 
C472 C473 1.4663 . ? 
C474 C617 1.5090 . ? 
C475 C579 1.3430 . ? 
C475 C534 1.3444 . ? 
C475 C647 1.5869 . ? 
C476 C481 1.5310 . ? 
C477 C650 1.5064 . ? 
C478 C623 1.3994 . ? 
C478 C603 1.4016 . ? 
C478 C614 1.5632 . ? 
C479 C628 1.4092 . ? 
C479 C550 1.4558 . ? 
C480 C485 1.5142 . ? 
C481 C567 1.3685 . ? 
C481 C739 1.4149 . ? 
C482 C487 1.4551 . ? 
C484 C626 1.5130 . ? 
C485 C646 1.3698 . ? 
C485 C591 1.4652 . ? 
C486 C606 1.4089 . ? 
C486 C604 1.4170 . ? 
C486 C605 1.4738 . ? 
C487 C631 1.3636 . ? 
C487 C634 1.4237 . ? 
C488 C628 1.4916 . ? 
C489 C654 1.4842 . ? 
C490 C645 1.4625 . ? 
C491 C594 1.4970 . ? 
C492 C625 1.5058 . ? 
C493 C638 1.3209 . ? 
C493 C632 1.4001 . ? 
C493 C494 1.5494 . ? 
C495 C497 1.5373 . ? 
C496 C497 1.3445 2_56: ? 
C496 C633 1.4179 . ? 
C497 C496 1.3445 2_56: ? 
C497 C656 1.3750 2_56: ? 
C498 N104 1.3545 . ? 
C498 C560 1.4914 . ? 
C499 C737 1.5291 . ? 
C500 C661 1.5709 . ? 
C500 C748 1.6294 . ? 
C501 N128 1.3650 . ? 
C501 C714 1.4411 . ? 
C502 N125 1.3571 . ? 
C502 C735 1.4709 . ? 
C503 N135 1.3172 . ? 
C503 C514 1.4706 . ? 
C504 C589 1.4082 . ? 
C504 C679 1.4131 . ? 
C505 C683 1.3825 . ? 
C505 C400 1.4039 . ? 
C505 C548 1.5144 . ? 
C506 N123 1.3358 . ? 
C506 C529 1.4151 . ? 
C507 N116 1.3229 . ? 
C507 C655 1.4430 . ? 
C508 C556 1.4272 . ? 
C508 C719 1.4340 . ? 
C509 C528 1.3546 . ? 
C510 N127 1.3607 . ? 
C510 C513 1.3648 . ? 
C511 N111 1.3492 . ? 
C511 C579 1.4581 . ? 
C512 C665 1.4735 . ? 
C512 C596 1.5475 . ? 
C513 C626 1.3996 . ? 
C514 C610 1.3685 . ? 
C515 C735 1.3497 . ? 
C515 C688 1.4084 . ? 
C515 C624 1.5749 . ? 
C516 C629 1.3253 . ? 
C516 C728 1.5129 . ? 
C517 C704 1.3541 . ? 
C518 C654 1.3439 . ? 
C518 C566 1.4526 . ? 
C519 C723 1.5940 . ? 
C520 C695 1.2768 . ? 
C520 C676 1.3903 . ? 
C520 C599 1.5091 . ? 
C521 C715 1.5029 . ? 
C522 N108 1.3190 . ? 
C522 C613 1.4102 . ? 
C523 N121 1.3002 . ? 
C523 C597 1.4704 . ? 
C524 N152 1.3528 . ? 
C524 C553 1.4153 . ? 
C525 C569 1.3897 . ? 
C525 C551 1.5033 . ? 
C526 C528 1.3488 . ? 
C526 C675 1.4940 . ? 
C527 C546 1.3774 . ? 
C527 C693 1.4874 . ? 
C528 C637 1.5621 . ? 
C530 N129 1.3103 . ? 
C530 C636 1.4347 . ? 
C531 C653 1.3411 . ? 
C531 C731 1.3975 . ? 
C532 N125 1.3502 . ? 
C532 C688 1.4328 . ? 
C533 N107 1.2544 . ? 
C533 C593 1.4156 . ? 
C534 C750 1.4211 . ? 
C535 C674 1.3619 . ? 
C535 C705 1.5718 . ? 
C536 C662 1.3761 . ? 
C536 C556 1.4173 . ? 
C537 C745 1.4126 . ? 
C537 C588 1.4334 . ? 
C538 N118 1.3776 . ? 
C538 C577 1.4299 . ? 
C539 C721 1.5719 . ? 
C540 C629 1.4436 . ? 
C541 N121 1.3490 . ? 
C541 C621 1.4067 . ? 
C543 C650 1.3909 . ? 
C544 N128 1.3030 . ? 
C544 C557 1.4059 . ? 
C545 C681 1.5183 . ? 
C546 C558 1.5131 . ? 
C547 C732 1.3645 . ? 
C547 C669 1.3919 . ? 
C547 C562 1.5599 . ? 
C549 C587 1.4255 . ? 
C549 C552 1.4442 . ? 
C550 N101 1.2946 . ? 
C551 N120 1.3310 . ? 
C552 C553 1.2680 . ? 
C552 C734 1.5090 . ? 
C554 N109 1.3164 . ? 
C554 C567 1.3983 . ? 
C555 C592 1.3958 . ? 
C555 C589 1.4079 . ? 
C556 C619 1.5050 . ? 
C557 C594 1.4620 . ? 
C559 N127 1.3251 . ? 
C559 C607 1.4494 . ? 
C560 C563 1.4111 . ? 
C563 C747 1.4088 . ? 
C563 C717 1.5235 . ? 
C564 C569 1.5066 . ? 
C565 C628 1.3434 . ? 
C565 C584 1.4597 . ? 
C566 N124 1.2867 . ? 
C568 N139 1.3541 . ? 
C568 C646 1.3854 . ? 
C569 C572 1.4481 . ? 
C570 N124 1.4246 . ? 
C570 C648 1.4441 . ? 
C571 C701 1.2805 . ? 
C571 C697 1.3532 . ? 
C571 C602 1.5394 . ? 
C572 C730 1.3963 . ? 
C573 C713 1.5841 . ? 
C574 C827 1.4229 . ? 
C574 C609 1.4396 . ? 
C575 N105 1.3579 . ? 
C575 C638 1.4295 . ? 
C576 N157 1.3293 . ? 
C576 C656 1.3782 . ? 
C578 C610 1.3789 . ? 
C578 C710 1.4589 . ? 
C580 C653 1.5144 . ? 
C581 C627 1.3580 . ? 
C581 C738 1.4037 . ? 
C582 C588 1.5095 . ? 
C583 N114 1.3768 . ? 
C583 C606 1.3782 . ? 
C584 N101 1.3342 . ? 
C585 C685 1.3701 . ? 
C585 C668 1.4146 . ? 
C585 C652 1.5242 . ? 
C586 C692 1.3562 . ? 
C586 C608 1.4207 . ? 
C586 C644 1.5637 . ? 
C587 N152 1.2986 . ? 
C588 C601 1.4517 . ? 
C589 C590 1.5048 . ? 
C591 C639 1.4429 . ? 
C592 N126 1.3227 . ? 
C593 C625 1.3949 . ? 
C594 C714 1.3583 . ? 
C595 C610 1.5359 . ? 
C597 C617 1.3644 . ? 
C598 C611 1.3944 . ? 
C600 N103 1.2921 . ? 
C600 C634 1.4145 . ? 
C601 C742 1.3380 . ? 
C603 C635 1.4097 . ? 
C604 C643 1.3663 . ? 
C607 C626 1.4203 . ? 
C608 C702 1.4191 . ? 
C609 C651 1.3377 . ? 
C609 C642 1.5700 . ? 
C611 N108 1.3236 . ? 
C612 N102 1.3248 . ? 
C612 C651 1.4110 . ? 
C616 N107 1.2884 . ? 
C616 C620 1.4620 . ? 
C617 C621 1.4209 . ? 
C618 C726 1.4324 . ? 
C620 C625 1.3977 . ? 
C622 N106 1.2852 . ? 
C622 C623 1.4100 . ? 
C627 C740 1.3587 . ? 
C630 N105 1.3332 . ? 
C630 C632 1.4084 . ? 
C631 C736 1.4654 . ? 
C633 N157 1.3058 . ? 
C635 N106 1.3292 . ? 
N139 C639 1.2869 . ? 
C640 C649 1.4821 . ? 
C643 N114 1.3323 . ? 
C645 N129 1.2824 . ? 
C648 C654 1.4106 . ? 
C649 C749 1.3719 . ? 
C649 C655 1.3850 . ? 
C650 C718 1.4534 . ? 
C653 C706 1.3548 . ? 
C656 C497 1.3750 2_56: ? 
C659 C737 1.4512 . ? 
C660 N115 1.3537 . ? 
C660 C676 1.4426 . ? 
C661 C399 1.6040 . ? 
C662 N136 1.4887 . ? 
C663 N132 1.4237 . ? 
C663 C669 1.4778 . ? 
C664 C397 1.4896 . ? 
C664 C686 1.7843 . ? 
C666 N134 1.3665 . ? 
C666 C684 1.5623 . ? 
C667 C703 1.2516 . ? 
C667 C711 1.5455 . ? 
C668 C672 1.5004 . ? 
C670 N112 1.3570 . ? 
C670 C685 1.4021 . ? 
C671 N138 1.3328 . ? 
C671 C697 1.3831 . ? 
C672 N112 1.2263 . ? 
C673 N119 1.3772 . ? 
C673 C740 1.4552 . ? 
C674 C694 1.5057 . ? 
C675 N130 1.4917 . ? 
C677 N134 1.2319 . ? 
C677 C699 1.5406 . ? 
C678 N137 1.3322 . ? 
C678 C692 1.4674 . ? 
C679 N126 1.3304 . ? 
C681 C689 1.4106 . ? 
C681 C438 1.4817 . ? 
C682 C721 1.3790 . ? 
C684 C723 1.4917 . ? 
C687 C391 1.7660 . ? 
C690 N133 1.3123 . ? 
C690 C746 1.4859 . ? 
C691 N118 1.3044 . ? 
C691 C743 1.3630 . ? 
C693 N131 1.3416 . ? 
C694 N113 1.2930 . ? 
C695 C720 1.4926 . ? 
C696 C741 1.3699 . ? 
C696 C724 1.5394 . ? 
C698 C744 1.4148 . ? 
C698 N133 1.4585 . ? 
C699 C723 1.3665 . ? 
C700 N138 1.4331 . ? 
C700 C701 1.4930 . ? 
C702 N137 1.2983 . ? 
C704 C707 1.5590 . ? 
C708 C747 1.4248 . ? 
C708 N104 1.4262 . ? 
C709 N123 1.3301 . ? 
C709 C727 1.3949 . ? 
C710 N135 1.4068 . ? 
C712 C715 1.3161 . ? 
C716 N113 1.3592 . ? 
C719 N136 1.3832 . ? 
C720 N115 1.3155 . ? 
C722 N109 1.3976 . ? 
C722 C739 1.4521 . ? 
C726 C746 1.3670 . ? 
C726 C744 1.4188 . ? 
C728 N117 1.5616 . ? 
C729 N117 1.2576 . ? 
C730 N120 1.3581 . ? 
C731 N122 1.3141 . ? 
C733 N116 1.3888 . ? 
C733 C749 1.3986 . ? 
C736 N103 1.2801 . ? 
C738 N119 1.4370 . ? 
C742 N110 1.4234 . ? 
C745 N110 1.4326 . ? 
C750 N111 1.3378 . ? 
C752 N16O 1.3447 . ? 
C752 C753 1.4173 . ? 
C753 C754 1.3762 . ? 
C754 C755 1.4456 . ? 
C754 C757 1.4975 . ? 
C755 C756 1.3924 . ? 
C756 N16O 1.3173 . ? 
C758 C759 1.3579 . ? 
C758 N162 1.3891 . ? 
C759 C760 1.4412 . ? 
C760 C761 1.3693 . ? 
C760 C763 1.4852 . ? 
C761 C762 1.4206 . ? 
C762 N162 1.3368 . ? 
C764 N161 1.3744 . ? 
C827 N102 1.4224 . ? 
N5 C48 1.2725 . ? 
C392 C434 1.6386 . ? 
C434 C418 1.7211 . ? 
C434 C383 1.7219 . ? 
C423 N95 1.4647 . ? 
C423 C397 1.5635 . ? 
C398 C438 1.3669 . ? 
C398 N90 1.7677 . ? 
N96 C393 1.4289 . ? 
N88 C427 1.5407 . ? 
N88 C801 1.5610 . ? 
N85 C399 1.6481 . ? 
C432 C386 1.4096 . ? 
C409 C725 1.5785 . ? 
C409 C801 1.5960 . ? 
C725 C439 1.2824 . ? 
C725 C680 1.6714 . ? 
C725 C801 1.8748 . ? 
N87 C426 1.5382 . ? 
N87 C394 1.6569 . ? 
C391 C446 1.5228 . ? 
C391 C395 1.5350 . ? 
C395 C394 1.5243 . ? 
C426 C446 1.5134 . ? 
C420 C390 1.5741 . ? 
C420 C424 1.5771 . ? 
C420 C382 1.6396 . ? 
O275 C382 1.5899 . ? 
N98 C405 1.4934 . ? 
N98 C422 1.4986 . ? 
C405 C390 1.4804 . ? 
C424 C422 1.5317 . ? 
O310 C382 1.0406 . ? 
O310 Dy62 2.3506 . ? 
N82 C800 1.4165 . ? 
N82 C386 1.4280 . ? 
C439 C427 1.5439 . ? 
C800 C389 1.4391 . ? 
C400 C393 1.4601 . ? 
Dy62 C382 2.8951 . ? 
 
loop_ 
 _geom_angle_atom_site_label_1 
 _geom_angle_atom_site_label_2 
 _geom_angle_atom_site_label_3 
 _geom_angle 
 _geom_angle_site_symmetry_1 
 _geom_angle_site_symmetry_3 
 _geom_angle_publ_flag 
C82 O12 Dy1 90.6 . . ? 
C82 O13 Dy1 93.6 . . ? 
C164 O16 Dy2 166.5 . . ? 
C311 O17 Dy23 98.1 . . ? 
C151 O18 Dy10 84.8 . . ? 
C180 O23 Dy16 139.9 . . ? 
C151 O27 Dy10 86.5 . . ? 
C245 O28 Dy51 87.4 . . ? 
C311 O29 Dy23 86.9 . . ? 
C214 O30 Dy1 140.8 . . ? 
C146 O32 Dy8 134.2 . . ? 
C355 O34 Dy1 136.8 . . ? 
C355 O35 Dy8 119.1 . . ? 
C346 O36 Dy23 134.3 . . ? 
C250 O39 Dy16 91.8 . . ? 
C285 O41 Dy10 146.0 . . ? 
C203 O42 Dy14 91.3 . . ? 
C107 O43 Dy42 89.6 . . ? 
C228 O45 Dy2 142.2 . . ? 
C198 O46 Dy35 123.4 . . ? 
C338 O47 Dy6 136.0 . . ? 
C214 O48 Dy13 129.3 . . ? 
C250 O50 Dy16 93.3 . . ? 
C245 O51 Dy51 86.1 . . ? 
C260 O52 Dy46 134.4 . . ? 
Dy9 O54 Dy8 105.0 . . ? 
Dy9 O54 Dy1 111.6 . . ? 
Dy8 O54 Dy1 102.7 . . ? 
C288 O55 Dy41 134.6 . . ? 
N70 O57 Dy15 139.8 . . ? 
N70 O57 Dy2 91.6 . . ? 
Dy15 O57 Dy2 124.8 . . ? 
C107 O59 Dy42 94.6 . . ? 
C166 O61 Dy35 138.0 . . ? 
Dy31 O62 Dy16 109.4 . . ? 
Dy31 O62 Dy8 107.3 . . ? 
Dy16 O62 Dy8 107.5 . . ? 
C298 O64 Dy27 134.1 . . ? 
C327 O65 Dy9 136.1 . . ? 
C240 O66 Dy9 134.1 . . ? 
C276 O67 Dy27 129.9 . . ? 
Dy9 O68 Dy13 105.1 . . ? 
Dy9 O68 Dy1 110.2 . . ? 
Dy13 O68 Dy1 105.0 . . ? 
C373 O70 Dy4 140.0 . . ? 
C146 O71 Dy31 125.3 . . ? 
Dy45 O72 Dy31 106.6 . . ? 
Dy45 O72 Dy25 104.1 . . ? 
Dy31 O72 Dy25 104.8 . . ? 
C273 O73 Dy4 139.1 . . ? 
C233 O74 Dy14 136.7 . . ? 
C203 O75 Dy14 92.7 . . ? 
C276 O76 Dy14 136.4 . . ? 
C373 O77 Dy49 129.6 . . ? 
N63 O79 Dy2 115.4 . . ? 
N63 O79 Dy13 133.4 . . ? 
Dy2 O79 Dy13 110.0 . . ? 
C269 O80 Dy32 125.1 . . ? 
C217 O81 Dy44 148.0 . . ? 
N60 O82 Dy9 140.2 . . ? 
N60 O82 Dy52 95.1 . . ? 
Dy9 O82 Dy52 122.2 . . ? 
C327 O83 Dy52 143.5 . . ? 
C258 O87 Dy18 134.7 . . ? 
C178 O88 Dy25 137.8 . . ? 
C127 O89 Dy20 137.2 . . ? 
C269 O90 Dy44 139.4 . . ? 
C272 O91 Dy50 129.3 . . ? 
C190 O92 Dy12 137.0 . . ? 
C115 O93 Dy24 134.7 . . ? 
C108 O94 Dy42 141.9 . . ? 
C287 O95 Dy6 133.2 . . ? 
Dy52 O96 Dy40 111.3 . . ? 
Dy52 O96 Dy34 108.2 . . ? 
Dy40 O96 Dy34 107.1 . . ? 
C243 O98 Dy19 85.1 . . ? 
C183 O99 Dy13 137.7 . . ? 
C130 O100 Dy6 140.7 . . ? 
Dy50 O101 Dy39 104.1 . . ? 
Dy50 O101 Dy48 104.4 . . ? 
Dy39 O101 Dy48 106.3 . . ? 
C130 O102 Dy17 123.1 . . ? 
C180 O103 Dy15 139.9 . . ? 
C190 O104 Dy28 137.0 . . ? 
C233 O105 Dy38 145.7 . . ? 
N63 O106 Dy15 142.3 . . ? 
N63 O106 Dy16 83.8 . . ? 
Dy15 O106 Dy16 103.6 . . ? 
C117 O107 Dy3 91.9 . . ? 
Dy41 O109 Dy6 106.8 . . ? 
Dy41 O109 Dy15 102.3 . . ? 
Dy6 O109 Dy15 112.8 . . ? 
C346 O110 Dy50 140.8 . . ? 
Dy42 O111 Dy21 106.2 . . ? 
Dy42 O111 Dy43 108.6 . . ? 
Dy21 O111 Dy43 102.8 . . ? 
N71 O113 Dy12 147.4 . . ? 
N71 O113 Dy28 97.2 . . ? 
Dy12 O113 Dy28 112.5 . . ? 
C115 O114 Dy26 137.3 . . ? 
C108 O115 Dy40 117.3 . . ? 
C228 O116 Dy15 142.6 . . ? 
C178 O117 Dy31 134.3 . . ? 
C243 O118 Dy19 90.5 . . ? 
C288 O120 Dy45 140.4 . . ? 
N75 O121 Dy38 142.3 . . ? 
N75 O121 Dy14 93.1 . . ? 
Dy38 O121 Dy14 117.8 . . ? 
C198 O122 Dy48 140.8 . . ? 
C111 O123 Dy40 132.5 . . ? 
C289 O124 Dy29 159.7 . . ? 
C273 O126 Dy47 124.5 . . ? 
C272 O127 Dy19 146.1 . . ? 
N71 O128 Dy9 145.5 . . ? 
N71 O128 Dy28 92.1 . . ? 
Dy9 O128 Dy28 116.1 . . ? 
C133 O129 Dy30 142.3 . . ? 
C279 O130 Dy51 137.3 . . ? 
Dy3 O131 Dy17 111.1 . . ? 
Dy3 O131 Dy22 106.5 . . ? 
Dy17 O131 Dy22 105.7 . . ? 
Dy9 O132 Dy13 105.0 . . ? 
Dy9 O132 Dy8 102.7 . . ? 
Dy13 O132 Dy8 105.7 . . ? 
C293 O133 Dy20 136.7 . . ? 
C270 O134 Dy48 137.9 . . ? 
N60 O135 Dy34 149.6 . . ? 
N60 O135 Dy52 97.0 . . ? 
Dy34 O135 Dy52 112.7 . . ? 
C132 O136 Dy17 135.2 . . ? 
Dy45 O137 Dy34 108.2 . . ? 
Dy45 O137 Dy25 104.7 . . ? 
Dy34 O137 Dy25 107.1 . . ? 
C379 O139 Dy25 143.5 . . ? 
C240 O140 Dy28 133.6 . . ? 
C102 O141 Dy33 126.1 . . ? 
C112 O142 Dy49 129.2 . . ? 
C165 O143 Dy44 137.8 . . ? 
N60 O144 Dy8 124.8 . . ? 
N60 O144 Dy31 115.5 . . ? 
Dy8 O144 Dy31 106.5 . . ? 
Dy46 O145 Dy30 106.7 . . ? 
Dy46 O145 Dy36 102.7 . . ? 
Dy30 O145 Dy36 111.6 . . ? 
C132 O147 Dy22 129.3 . . ? 
C102 O148 Dy5 138.0 . . ? 
Dy26 O149 Dy37 105.4 . . ? 
Dy26 O149 Dy32 105.3 . . ? 
Dy37 O149 Dy32 107.3 . . ? 
C123 O150 Dy25 144.7 . . ? 
C258 O152 Dy33 136.5 . . ? 
C263 O154 Dy24 160.2 . . ? 
C270 O155 Dy47 135.7 . . ? 
C166 O157 Dy39 130.4 . . ? 
C298 O158 Dy39 139.8 . . ? 
C129 O159 Dy37 138.2 . . ? 
C260 O160 Dy30 140.6 . . ? 
C293 O161 Dy5 137.8 . . ? 
Dy13 O162 Dy8 108.3 . . ? 
Dy13 O162 Dy1 106.1 . . ? 
Dy8 O162 Dy1 103.2 . . ? 
Dy25 O163 Dy31 107.3 . . ? 
Dy25 O163 Dy34 107.7 . . ? 
Dy31 O163 Dy34 103.8 . . ? 
C183 O165 Dy7 138.5 . . ? 
N74 O167 Dy50 141.8 . . ? 
N74 O167 Dy23 91.9 . . ? 
Dy50 O167 Dy23 120.5 . . ? 
C165 O168 Dy37 131.9 . . ? 
C105 O169 Dy22 133.6 . . ? 
Dy11 O170 Dy12 106.5 . . ? 
Dy11 O170 Dy7 110.0 . . ? 
Dy12 O170 Dy7 103.2 . . ? 
N76 O171 Dy18 149.9 . . ? 
N76 O171 Dy51 95.9 . . ? 
Dy18 O171 Dy51 113.3 . . ? 
N64 O173 Dy16 92.6 . . ? 
N64 O173 Dy15 142.5 . . ? 
Dy16 O173 Dy15 115.1 . . ? 
Dy49 O174 Dy47 105.7 . . ? 
Dy49 O174 Dy4 105.8 . . ? 
Dy47 O174 Dy4 103.1 . . ? 
C109 O175 Dy43 139.3 . . ? 
C262 O176 Dy42 139.2 . . ? 
N67 O177 Dy46 145.7 . . ? 
N67 O177 Dy19 98.6 . . ? 
Dy46 O177 Dy19 113.0 . . ? 
Dy23 O178 Dy49 108.4 . . ? 
Dy23 O178 Dy32 108.6 . . ? 
Dy49 O178 Dy32 108.9 . . ? 
N74 O179 Dy49 149.4 . . ? 
N74 O179 Dy23 98.6 . . ? 
Dy49 O179 Dy23 111.6 . . ? 
C111 O180 Dy34 131.2 . . ? 
Dy18 O181 Dy4 110.2 . . ? 
Dy18 O181 Dy47 105.9 . . ? 
Dy4 O181 Dy47 103.1 . . ? 
N73 O182 Dy50 135.3 . . ? 
N73 O182 Dy19 87.1 . . ? 
Dy50 O182 Dy19 102.8 . . ? 
C279 O183 Dy26 135.8 . . ? 
Dy35 O184 Dy50 113.5 . . ? 
Dy35 O184 Dy48 104.2 . . ? 
Dy50 O184 Dy48 104.0 . . ? 
N78 O185 Dy3 114.5 . . ? 
N78 O185 Dy17 133.7 . . ? 
Dy3 O185 Dy17 111.5 . . ? 
N72 O186 Dy45 145.3 . . ? 
N72 O186 Dy29 96.2 . . ? 
Dy45 O186 Dy29 111.1 . . ? 
N65 O187 Dy14 104.9 . . ? 
N65 O187 Dy39 134.6 . . ? 
Dy14 O187 Dy39 109.8 . . ? 
C109 O188 Dy29 134.1 . . ? 
Dy48 O189 Dy39 108.3 . . ? 
Dy48 O189 Dy35 102.1 . . ? 
Dy39 O189 Dy35 104.3 . . ? 
Dy49 O190 Dy4 106.6 . . ? 
Dy49 O190 Dy18 104.1 . . ? 
Dy4 O190 Dy18 107.6 . . ? 
Dy38 O191 Dy20 104.9 . . ? 
Dy38 O191 Dy33 102.8 . . ? 
Dy20 O191 Dy33 105.0 . . ? 
Dy26 O192 Dy32 105.2 . . ? 
Dy26 O192 Dy44 111.8 . . ? 
Dy32 O192 Dy44 105.9 . . ? 
N69 O193 Dy33 143.6 . . ? 
N69 O193 Dy51 101.0 . . ? 
Dy33 O193 Dy51 112.2 . . ? 
Dy39 O194 Dy35 108.1 . . ? 
Dy39 O194 Dy50 103.1 . . ? 
Dy35 O194 Dy50 110.6 . . ? 
N73 O195 Dy23 114.2 . . ? 
N73 O195 Dy32 134.9 . . ? 
Dy23 O195 Dy32 109.7 . . ? 
Dy37 O196 Dy32 108.0 . . ? 
Dy37 O196 Dy44 103.4 . . ? 
Dy32 O196 Dy44 105.5 . . ? 
N62 O197 Dy52 108.4 . . ? 
N62 O197 Dy40 132.4 . . ? 
Dy52 O197 Dy40 115.1 . . ? 
Dy17 O198 Dy15 104.4 . . ? 
Dy17 O198 Dy6 103.4 . . ? 
Dy15 O198 Dy6 108.9 . . ? 
C129 O199 Dy46 127.1 . . ? 
C105 O200 Dy11 135.2 . . ? 
C287 O201 Dy41 134.4 . . ? 
C123 O202 Dy45 114.9 . . ? 
C106 O203 Dy3 136.7 . . ? 
N63 O204 Dy8 147.6 . . ? 
N63 O204 Dy16 102.3 . . ? 
Dy8 O204 Dy16 109.9 . . ? 
Dy21 O205 Dy28 111.4 . . ? 
Dy21 O205 Dy12 108.2 . . ? 
Dy28 O205 Dy12 107.3 . . ? 
N76 O206 Dy26 141.3 . . ? 
N76 O206 Dy51 94.6 . . ? 
Dy26 O206 Dy51 116.7 . . ? 
N64 O207 Dy31 149.2 . . ? 
N64 O207 Dy16 94.7 . . ? 
Dy31 O207 Dy16 111.4 . . ? 
Dy14 O208 Dy39 110.3 . . ? 
Dy14 O208 Dy27 109.0 . . ? 
Dy39 O208 Dy27 107.8 . . ? 
N65 O209 Dy38 136.9 . . ? 
N65 O209 Dy10 88.3 . . ? 
Dy38 O209 Dy10 100.9 . . ? 
N65 O209 Dy14 80.9 . . ? 
Dy38 O209 Dy14 100.6 . . ? 
Dy10 O209 Dy14 157.2 . . ? 
C285 O210 Dy38 128.7 . . ? 
N69 O211 Dy26 137.2 . . ? 
N69 O211 Dy51 88.7 . . ? 
Dy26 O211 Dy51 103.1 . . ? 
N70 O212 Dy7 154.1 . . ? 
N70 O212 Dy2 96.2 . . ? 
Dy7 O212 Dy2 109.6 . . ? 
C127 O213 Dy36 134.1 . . ? 
N62 O214 Dy28 90.6 . . ? 
N62 O214 Dy9 137.1 . . ? 
Dy28 O214 Dy9 102.8 . . ? 
N76 O215 Dy32 120.9 . . ? 
N76 O215 Dy49 118.4 . . ? 
Dy32 O215 Dy49 107.7 . . ? 
N77 O216 Dy47 150.5 . . ? 
N77 O216 Dy10 97.3 . . ? 
Dy47 O216 Dy10 112.1 . . ? 
N67 O217 Dy50 140.7 . . ? 
N67 O217 Dy19 93.1 . . ? 
Dy50 O217 Dy19 114.4 . . ? 
N66 O219 Dy36 151.5 . . ? 
N66 O219 Dy24 97.4 . . ? 
Dy36 O219 Dy24 110.9 . . ? 
N61 O220 Dy22 146.8 . . ? 
N61 O220 Dy3 98.5 . . ? 
Dy22 O220 Dy3 110.1 . . ? 
Dy37 O221 Dy44 103.8 . . ? 
Dy37 O221 Dy26 103.9 . . ? 
Dy44 O221 Dy26 110.2 . . ? 
C124 O222 Dy21 135.6 . . ? 
N78 O223 Dy43 135.9 . . ? 
N78 O223 Dy29 86.1 . . ? 
Dy43 O223 Dy29 103.7 . . ? 
N67 O224 Dy39 117.8 . . ? 
N67 O224 Dy27 124.4 . . ? 
Dy39 O224 Dy27 109.8 . . ? 
Dy48 O225 Dy10 108.4 . . ? 
Dy48 O225 Dy47 106.6 . . ? 
Dy10 O225 Dy47 108.4 . . ? 
Dy46 O226 Dy27 106.8 . . ? 
Dy46 O226 Dy30 104.5 . . ? 
Dy27 O226 Dy30 106.5 . . ? 
N75 O227 Dy27 148.6 . . ? 
N75 O227 Dy14 98.0 . . ? 
Dy27 O227 Dy14 110.0 . . ? 
N65 O228 Dy10 103.7 . . ? 
N65 O228 Dy48 141.1 . . ? 
Dy10 O228 Dy48 109.3 . . ? 
N72 O229 Dy43 146.6 . . ? 
N72 O229 Dy29 94.3 . . ? 
Dy43 O229 Dy29 115.4 . . ? 
Dy5 O230 Dy38 111.2 . . ? 
Dy5 O230 Dy20 106.7 . . ? 
Dy38 O230 Dy20 103.3 . . ? 
N66 O231 Dy26 141.4 . . ? 
N66 O231 Dy24 93.3 . . ? 
Dy26 O231 Dy24 123.8 . . ? 
N69 O232 Dy24 112.9 . . ? 
N69 O232 Dy20 134.6 . . ? 
Dy24 O232 Dy20 110.7 . . ? 
Dy29 O233 Dy45 111.4 . . ? 
Dy29 O233 Dy41 107.8 . . ? 
Dy45 O233 Dy41 107.0 . . ? 
C117 O234 Dy3 91.9 . . ? 
C223 O235 Dy28 165.3 . . ? 
N72 O236 Dy40 121.5 . . ? 
N72 O236 Dy34 121.3 . . ? 
Dy40 O236 Dy34 109.2 . . ? 
N61 O237 Dy43 140.3 . . ? 
N61 O237 Dy3 92.5 . . ? 
Dy43 O237 Dy3 120.8 . . ? 
N71 O238 Dy13 123.8 . . ? 
N71 O238 Dy7 118.3 . . ? 
Dy13 O238 Dy7 107.4 . . ? 
C112 O239 Dy32 141.7 . . ? 
Dy33 O240 Dy20 109.1 . . ? 
Dy33 O240 Dy5 105.6 . . ? 
Dy20 O240 Dy5 104.0 . . ? 
Dy24 O241 Dy20 111.4 . . ? 
Dy24 O241 Dy36 109.4 . . ? 
Dy20 O241 Dy36 108.2 . . ? 
Dy19 O242 Dy37 109.1 . . ? 
Dy19 O242 Dy46 110.0 . . ? 
Dy37 O242 Dy46 107.7 . . ? 
Dy41 O243 Dy17 109.0 . . ? 
Dy41 O243 Dy6 104.8 . . ? 
Dy17 O243 Dy6 104.5 . . ? 
N64 O245 Dy41 114.7 . . ? 
N64 O245 Dy45 122.1 . . ? 
Dy41 O245 Dy45 111.0 . . ? 
Dy15 O246 Dy17 104.7 . . ? 
Dy15 O246 Dy41 101.8 . . ? 
Dy17 O246 Dy41 107.1 . . ? 
N78 O247 Dy29 101.3 . . ? 
N78 O247 Dy41 141.0 . . ? 
Dy29 O247 Dy41 110.2 . . ? 
Dy2 O248 Dy13 112.2 . . ? 
Dy2 O248 Dy7 108.0 . . ? 
Dy13 O248 Dy7 107.1 . . ? 
Dy36 O249 Dy30 110.9 . . ? 
Dy36 O249 Dy27 102.4 . . ? 
Dy30 O249 Dy27 105.4 . . ? 
Dy11 O250 Dy22 105.1 . . ? 
Dy11 O250 Dy7 108.4 . . ? 
Dy22 O250 Dy7 101.4 . . ? 
O454 Dy1A O441 125.7 . . ? 
O454 Dy1A O504 70.7 . . ? 
O441 Dy1A O504 73.7 . . ? 
O454 Dy1A O495 71.7 . . ? 
O441 Dy1A O495 148.6 . . ? 
O504 Dy1A O495 136.6 . . ? 
O454 Dy1A O532 128.4 . . ? 
O441 Dy1A O532 81.6 . . ? 
O504 Dy1A O532 155.1 . . ? 
O495 Dy1A O532 68.2 . . ? 
O454 Dy1A O475 76.0 . . ? 
O441 Dy1A O475 74.0 . . ? 
O504 Dy1A O475 103.4 . . ? 
O495 Dy1A O475 87.7 . . ? 
O532 Dy1A O475 71.3 . . ? 
O454 Dy1A O339 145.3 . . ? 
O441 Dy1A O339 73.0 . . ? 
O504 Dy1A O339 91.3 . . ? 
O495 Dy1A O339 108.1 . . ? 
O532 Dy1A O339 79.0 . . ? 
O475 Dy1A O339 138.2 . . ? 
O454 Dy1A O429 71.7 . . ? 
O441 Dy1A O429 128.2 . . ? 
O504 Dy1A O429 68.2 . . ? 
O495 Dy1A O429 80.1 . . ? 
O532 Dy1A O429 129.0 . . ? 
O475 Dy1A O429 147.7 . . ? 
O339 Dy1A O429 74.1 . . ? 
O454 Dy1A Dy94 37.0 . . ? 
O441 Dy1A Dy94 92.0 . . ? 
O504 Dy1A Dy94 38.2 . . ? 
O495 Dy1A Dy94 108.7 . . ? 
O532 Dy1A Dy94 147.9 . . ? 
O475 Dy1A Dy94 76.7 . . ? 
O339 Dy1A Dy94 129.2 . . ? 
O429 Dy1A Dy94 79.1 . . ? 
O454 Dy1A Dy95 37.0 . . ? 
O441 Dy1A Dy95 149.6 . . ? 
O504 Dy1A Dy95 76.2 . . ? 
O495 Dy1A Dy95 60.7 . . ? 
O532 Dy1A Dy95 128.7 . . ? 
O475 Dy1A Dy95 110.3 . . ? 
O339 Dy1A Dy95 111.2 . . ? 
O429 Dy1A Dy95 38.0 . . ? 
Dy94 Dy1A Dy95 61.4 . . ? 
O454 Dy1A Dy99 75.907(15) . . ? 
O441 Dy1A Dy99 96.363(15) . . ? 
O504 Dy1A Dy99 34.837(15) . . ? 
O495 Dy1A Dy99 114.241(14) . . ? 
O532 Dy1A Dy99 151.132(15) . . ? 
O475 Dy1A Dy99 136.090(16) . . ? 
O339 Dy1A Dy99 72.892(15) . . ? 
O429 Dy1A Dy99 35.359(15) . . ? 
Dy94 Dy1A Dy99 60.600(15) . . ? 
Dy95 Dy1A Dy99 58.928(15) . . ? 
O454 Dy1A Dy84 106.0 . . ? 
O441 Dy1A Dy84 116.7 . . ? 
O504 Dy1A Dy84 167.0 . . ? 
O495 Dy1A Dy84 35.4 . . ? 
O532 Dy1A Dy84 35.6 . . ? 
O475 Dy1A Dy84 87.6 . . ? 
O339 Dy1A Dy84 84.9 . . ? 
O429 Dy1A Dy84 98.8 . . ? 
Dy94 Dy1A Dy84 142.1 . . ? 
Dy95 Dy1A Dy84 93.6 . . ? 
Dy99 Dy1A Dy84 132.589(15) . . ? 
O30 Dy1 O34 115.1 . . ? 
O30 Dy1 O162 78.8 . . ? 
O34 Dy1 O162 80.0 . . ? 
O30 Dy1 O2 71.6 . . ? 
O34 Dy1 O2 68.0 . . ? 
O162 Dy1 O2 119.9 . . ? 
O30 Dy1 O68 83.4 . . ? 
O34 Dy1 O68 141.7 . . ? 
O162 Dy1 O68 70.8 . . ? 
O2 Dy1 O68 149.0 . . ? 
O30 Dy1 O54 144.0 . . ? 
O34 Dy1 O54 81.1 . . ? 
O162 Dy1 O54 72.5 . . ? 
O2 Dy1 O54 142.3 . . ? 
O68 Dy1 O54 67.1 . . ? 
O30 Dy1 O12 128.6 . . ? 
O34 Dy1 O12 90.2 . . ? 
O162 Dy1 O12 152.2 . . ? 
O2 Dy1 O12 79.0 . . ? 
O68 Dy1 O12 104.1 . . ? 
O54 Dy1 O12 80.3 . . ? 
O30 Dy1 O13 75.8 . . ? 
O34 Dy1 O13 136.3 . . ? 
O162 Dy1 O13 142.3 . . ? 
O2 Dy1 O13 77.4 . . ? 
O68 Dy1 O13 78.9 . . ? 
O54 Dy1 O13 115.7 . . ? 
O12 Dy1 O13 56.8 . . ? 
O30 Dy1 C82 100.7 . . ? 
O34 Dy1 C82 116.2 . . ? 
O162 Dy1 C82 161.3 . . ? 
O2 Dy1 C82 76.8 . . ? 
O68 Dy1 C82 90.5 . . ? 
O54 Dy1 C82 99.7 . . ? 
O12 Dy1 C82 30.4 . . ? 
O13 Dy1 C82 26.5 . . ? 
O30 Dy1 Dy8 117.1 . . ? 
O34 Dy1 Dy8 64.8 . . ? 
O162 Dy1 Dy8 38.3 . . ? 
O2 Dy1 Dy8 130.7 . . ? 
O68 Dy1 Dy8 76.9 . . ? 
O54 Dy1 Dy8 38.4 . . ? 
O12 Dy1 Dy8 114.1 . . ? 
O13 Dy1 Dy8 150.8 . . ? 
C82 Dy1 Dy8 137.9 . . ? 
O30 Dy1 Dy13 66.9 . . ? 
O34 Dy1 Dy13 116.8 . . ? 
O162 Dy1 Dy13 36.9 . . ? 
O2 Dy1 Dy13 135.5 . . ? 
O68 Dy1 Dy13 37.5 . . ? 
O54 Dy1 Dy13 77.2 . . ? 
O12 Dy1 Dy13 141.0 . . ? 
O13 Dy1 Dy13 106.5 . . ? 
C82 Dy1 Dy13 125.6 . . ? 
Dy8 Dy1 Dy13 61.4 . . ? 
O30 Dy1 Dy9 118.0 . . ? 
O34 Dy1 Dy9 114.6 . . ? 
O162 Dy1 Dy9 75.6 . . ? 
O2 Dy1 Dy9 164.0 . . ? 
O68 Dy1 Dy9 34.9 . . ? 
O54 Dy1 Dy9 33.8 . . ? 
O12 Dy1 Dy9 85.1 . . ? 
O13 Dy1 Dy9 92.2 . . ? 
C82 Dy1 Dy9 88.5 . . ? 
Dy8 Dy1 Dy9 58.6 . . ? 
Dy13 Dy1 Dy9 58.9 . . ? 
O471 Dy2A O465 112.4 . . ? 
O471 Dy2A O523 141.3 . . ? 
O465 Dy2A O523 82.2 . . ? 
O471 Dy2A O382 81.4 . . ? 
O465 Dy2A O382 145.3 . . ? 
O523 Dy2A O382 69.4 . . ? 
O471 Dy2A O431 85.5 . . ? 
O465 Dy2A O431 138.3 . . ? 
O523 Dy2A O431 107.7 . . ? 
O382 Dy2A O431 71.8 . . ? 
O471 Dy2A O536 76.4 . . ? 
O465 Dy2A O536 81.3 . . ? 
O523 Dy2A O536 70.5 . . ? 
O382 Dy2A O536 70.9 . . ? 
O431 Dy2A O536 140.4 . . ? 
O471 Dy2A O436 74.3 . . ? 
O465 Dy2A O436 73.7 . . ? 
O523 Dy2A O436 143.6 . . ? 
O382 Dy2A O436 140.6 . . ? 
O431 Dy2A O436 75.8 . . ? 
O536 Dy2A O436 129.9 . . ? 
O471 Dy2A O453 133.2 . . ? 
O465 Dy2A O453 92.1 . . ? 
O523 Dy2A O453 78.6 . . ? 
O382 Dy2A O453 101.0 . . ? 
O431 Dy2A O453 52.7 . . ? 
O536 Dy2A O453 149.0 . . ? 
O436 Dy2A O453 75.6 . . ? 
O471 Dy2A C474 108.7 . . ? 
O465 Dy2A C474 116.0 . . ? 
O523 Dy2A C474 94.7 . . ? 
O382 Dy2A C474 86.7 . . ? 
O431 Dy2A C474 25.7 . . ? 
O536 Dy2A C474 156.3 . . ? 
O436 Dy2A C474 72.8 . . ? 
O453 Dy2A C474 27.1 . . ? 
O471 Dy2A Dy97 63.0 . . ? 
O465 Dy2A Dy97 119.0 . . ? 
O523 Dy2A Dy97 78.5 . . ? 
O382 Dy2A Dy97 37.5 . . ? 
O431 Dy2A Dy97 102.8 . . ? 
O536 Dy2A Dy97 37.7 . . ? 
O436 Dy2A Dy97 137.2 . . ? 
O453 Dy2A Dy97 137.9 . . ? 
C474 Dy2A Dy97 122.9 . . ? 
O471 Dy2A Dy98 113.309(15) . . ? 
O465 Dy2A Dy98 69.056(15) . . ? 
O523 Dy2A Dy98 36.404(15) . . ? 
O382 Dy2A Dy98 76.214(16) . . ? 
O431 Dy2A Dy98 139.772(15) . . ? 
O536 Dy2A Dy98 36.956(15) . . ? 
O436 Dy2A Dy98 142.003(16) . . ? 
O453 Dy2A Dy98 112.544(15) . . ? 
C474 Dy2A Dy98 131.117(15) . . ? 
Dy97 Dy2A Dy98 61.330(16) . . ? 
O471 Dy2A Dy92 116.3 . . ? 
O465 Dy2A Dy92 118.1 . . ? 
O523 Dy2A Dy92 36.0 . . ? 
O382 Dy2A Dy92 35.4 . . ? 
O431 Dy2A Dy92 81.8 . . ? 
O536 Dy2A Dy92 75.5 . . ? 
O436 Dy2A Dy92 154.5 . . ? 
O453 Dy2A Dy92 81.2 . . ? 
C474 Dy2A Dy92 81.7 . . ? 
Dy97 Dy2A Dy92 59.8 . . ? 
Dy98 Dy2A Dy92 58.059(15) . . ? 
O45 Dy2 O16 81.0 . . ? 
O45 Dy2 O248 162.3 . . ? 
O16 Dy2 O248 90.6 . . ? 
O45 Dy2 O79 124.7 . . ? 
O16 Dy2 O79 148.4 . . ? 
O248 Dy2 O79 69.0 . . ? 
O45 Dy2 O212 121.9 . . ? 
O16 Dy2 O212 68.9 . . ? 
O248 Dy2 O212 68.2 . . ? 
O79 Dy2 O212 80.9 . . ? 
O45 Dy2 O15 87.5 . . ? 
O16 Dy2 O15 74.2 . . ? 
O248 Dy2 O15 75.2 . . ? 
O79 Dy2 O15 120.3 . . ? 
O212 Dy2 O15 126.6 . . ? 
O45 Dy2 O86 75.4 . . ? 
O16 Dy2 O86 133.4 . . ? 
O248 Dy2 O86 100.0 . . ? 
O79 Dy2 O86 75.7 . . ? 
O212 Dy2 O86 156.4 . . ? 
O15 Dy2 O86 65.4 . . ? 
O45 Dy2 O57 77.1 . . ? 
O16 Dy2 O57 88.7 . . ? 
O248 Dy2 O57 118.5 . . ? 
O79 Dy2 O57 81.0 . . ? 
O212 Dy2 O57 54.5 . . ? 
O15 Dy2 O57 158.6 . . ? 
O86 Dy2 O57 123.2 . . ? 
O45 Dy2 N70 98.3 . . ? 
O16 Dy2 N70 75.0 . . ? 
O248 Dy2 N70 94.4 . . ? 
O79 Dy2 N70 82.5 . . ? 
O212 Dy2 N70 27.4 . . ? 
O15 Dy2 N70 147.2 . . ? 
O86 Dy2 N70 147.3 . . ? 
O57 Dy2 N70 27.4 . . ? 
O45 Dy2 Dy7 145.4 . . ? 
O16 Dy2 Dy7 67.0 . . ? 
O248 Dy2 Dy7 36.7 . . ? 
O79 Dy2 Dy7 83.0 . . ? 
O212 Dy2 Dy7 34.6 . . ? 
O15 Dy2 Dy7 95.6 . . ? 
O86 Dy2 Dy7 136.7 . . ? 
O57 Dy2 Dy7 89.1 . . ? 
N70 Dy2 Dy7 61.9 . . ? 
O45 Dy2 Dy13 154.5 . . ? 
O16 Dy2 Dy13 123.9 . . ? 
O248 Dy2 Dy13 34.5 . . ? 
O79 Dy2 Dy13 35.4 . . ? 
O212 Dy2 Dy13 77.0 . . ? 
O15 Dy2 Dy13 94.0 . . ? 
O86 Dy2 Dy13 82.1 . . ? 
O57 Dy2 Dy13 106.3 . . ? 
N70 Dy2 Dy13 94.1 . . ? 
Dy7 Dy2 Dy13 59.8 . . ? 
O492 Dy3A O370 122.4 . . ? 
O492 Dy3A O512 73.0 . . ? 
O370 Dy3A O512 67.4 . . ? 
O492 Dy3A O380 82.8 . . ? 
O370 Dy3A O380 142.3 . . ? 
O512 Dy3A O380 150.1 . . ? 
O492 Dy3A O413 71.0 . . ? 
O370 Dy3A O413 129.1 . . ? 
O512 Dy3A O413 72.6 . . ? 
O380 Dy3A O413 83.2 . . ? 
O492 Dy3A O392 75.6 . . ? 
O370 Dy3A O392 74.3 . . ? 
O512 Dy3A O392 102.6 . . ? 
O380 Dy3A O392 87.6 . . ? 
O413 Dy3A O392 146.2 . . ? 
O492 Dy3A O515 147.5 . . ? 
O370 Dy3A O515 77.2 . . ? 
O512 Dy3A O515 95.4 . . ? 
O380 Dy3A O515 95.9 . . ? 
O413 Dy3A O515 76.6 . . ? 
O392 Dy3A O515 136.9 . . ? 
O492 Dy3A O480 133.4 . . ? 
O370 Dy3A O480 74.7 . . ? 
O512 Dy3A O480 142.0 . . ? 
O380 Dy3A O480 67.8 . . ? 
O413 Dy3A O480 135.5 . . ? 
O392 Dy3A O480 68.1 . . ? 
O515 Dy3A O480 73.7 . . ? 
O492 Dy3A Dy83 39.3 . . ? 
O370 Dy3A Dy83 85.9 . . ? 
O512 Dy3A Dy83 38.4 . . ? 
O380 Dy3A Dy83 121.9 . . ? 
O413 Dy3A Dy83 81.6 . . ? 
O392 Dy3A Dy83 75.8 . . ? 
O515 Dy3A Dy83 133.4 . . ? 
O480 Dy3A Dy83 142.3 . . ? 
O492 Dy3A Dy96 78.1 . . ? 
O370 Dy3A Dy96 93.5 . . ? 
O512 Dy3A Dy96 37.8 . . ? 
O380 Dy3A Dy96 120.7 . . ? 
O413 Dy3A Dy96 37.5 . . ? 
O392 Dy3A Dy96 138.1 . . ? 
O515 Dy3A Dy96 74.7 . . ? 
O480 Dy3A Dy96 148.0 . . ? 
Dy83 Dy3A Dy96 63.3 . . ? 
O492 Dy3A Dy82 35.3 . . ? 
O370 Dy3A Dy82 143.7 . . ? 
O512 Dy3A Dy82 76.9 . . ? 
O380 Dy3A Dy82 73.2 . . ? 
O413 Dy3A Dy82 37.3 . . ? 
O392 Dy3A Dy82 108.9 . . ? 
O515 Dy3A Dy82 113.2 . . ? 
O480 Dy3A Dy82 141.0 . . ? 
Dy83 Dy3A Dy82 61.3 . . ? 
Dy96 Dy3A Dy82 59.2 . . ? 
O492 Dy3A Dy5A 167.0 . . ? 
O370 Dy3A Dy5A 67.6 . . ? 
O512 Dy3A Dy5A 119.9 . . ? 
O380 Dy3A Dy5A 84.5 . . ? 
O413 Dy3A Dy5A 110.1 . . ? 
O392 Dy3A Dy5A 101.3 . . ? 
O515 Dy3A Dy5A 37.0 . . ? 
O480 Dy3A Dy5A 37.2 . . ? 
Dy83 Dy3A Dy5A 152.9 . . ? 
Dy96 Dy3A Dy5A 110.8 . . ? 
Dy82 Dy3A Dy5A 141.2 . . ? 
O203 Dy3 O153 78.5 . . ? 
O203 Dy3 O131 158.4 . . ? 
O153 Dy3 O131 87.5 . . ? 
O203 Dy3 O220 130.8 . . ? 
O153 Dy3 O220 148.6 . . ? 
O131 Dy3 O220 67.3 . . ? 
O203 Dy3 O185 122.6 . . ? 
O153 Dy3 O185 77.4 . . ? 
O131 Dy3 O185 69.0 . . ? 
O220 Dy3 O185 76.3 . . ? 
O203 Dy3 O107 84.9 . . ? 
O153 Dy3 O107 133.0 . . ? 
O131 Dy3 O107 93.0 . . ? 
O220 Dy3 O107 69.4 . . ? 
O185 Dy3 O107 145.4 . . ? 
O203 Dy3 O237 81.2 . . ? 
O153 Dy3 O237 138.2 . . ? 
O131 Dy3 O237 119.8 . . ? 
O220 Dy3 O237 54.3 . . ? 
O185 Dy3 O237 83.7 . . ? 
O107 Dy3 O237 80.3 . . ? 
O203 Dy3 O234 77.7 . . ? 
O153 Dy3 O234 79.7 . . ? 
O131 Dy3 O234 83.7 . . ? 
O220 Dy3 O234 113.8 . . ? 
O185 Dy3 O234 144.8 . . ? 
O107 Dy3 O234 53.7 . . ? 
O237 Dy3 O234 130.4 . . ? 
O203 Dy3 C117 79.0 . . ? 
O153 Dy3 C117 105.3 . . ? 
O131 Dy3 C117 89.1 . . ? 
O220 Dy3 C117 93.1 . . ? 
O185 Dy3 C117 157.9 . . ? 
O107 Dy3 C117 27.8 . . ? 
O237 Dy3 C117 106.0 . . ? 
O234 Dy3 C117 26.0 . . ? 
O203 Dy3 N61 105.6 . . ? 
O153 Dy3 N61 157.6 . . ? 
O131 Dy3 N61 93.7 . . ? 
O220 Dy3 N61 26.6 . . ? 
O185 Dy3 N61 82.1 . . ? 
O107 Dy3 N61 69.4 . . ? 
O237 Dy3 N61 28.1 . . ? 
O234 Dy3 N61 122.7 . . ? 
C117 Dy3 N61 97.1 . . ? 
O203 Dy3 Dy22 150.8 . . ? 
O153 Dy3 Dy22 125.0 . . ? 
O131 Dy3 Dy22 37.6 . . ? 
O220 Dy3 Dy22 34.4 . . ? 
O185 Dy3 Dy22 82.7 . . ? 
O107 Dy3 Dy22 66.4 . . ? 
O237 Dy3 Dy22 88.3 . . ? 
O234 Dy3 Dy22 88.9 . . ? 
C117 Dy3 Dy22 77.8 . . ? 
N61 Dy3 Dy22 60.2 . . ? 
O203 Dy3 Dy17 149.3 . . ? 
O153 Dy3 Dy17 75.9 . . ? 
O131 Dy3 Dy17 35.2 . . ? 
O220 Dy3 Dy17 72.7 . . ? 
O185 Dy3 Dy17 34.4 . . ? 
O107 Dy3 Dy17 125.2 . . ? 
O237 Dy3 Dy17 107.4 . . ? 
O234 Dy3 Dy17 113.6 . . ? 
C117 Dy3 Dy17 124.1 . . ? 
N61 Dy3 Dy17 92.2 . . ? 
Dy22 Dy3 Dy17 59.9 . . ? 
O518 Dy4A O374 78.5 . . ? 
O518 Dy4A O530 70.1 . . ? 
O374 Dy4A O530 135.4 . . ? 
O518 Dy4A O485 137.5 . . ? 
O374 Dy4A O485 143.8 . . ? 
O530 Dy4A O485 72.2 . . ? 
O518 Dy4A O473 152.6 . . ? 
O374 Dy4A O473 75.2 . . ? 
O530 Dy4A O473 125.9 . . ? 
O485 Dy4A O473 68.8 . . ? 
O518 Dy4A O439 70.0 . . ? 
O374 Dy4A O439 126.1 . . ? 
O530 Dy4A O439 71.5 . . ? 
O485 Dy4A O439 80.0 . . ? 
O473 Dy4A O439 133.3 . . ? 
O518 Dy4A O312 103.9 . . ? 
O374 Dy4A O312 76.2 . . ? 
O530 Dy4A O312 141.2 . . ? 
O485 Dy4A O312 93.2 . . ? 
O473 Dy4A O312 77.2 . . ? 
O439 Dy4A O312 70.6 . . ? 
O518 Dy4A O448 95.3 . . ? 
O374 Dy4A O448 79.3 . . ? 
O530 Dy4A O448 73.0 . . ? 
O485 Dy4A O448 91.9 . . ? 
O473 Dy4A O448 72.4 . . ? 
O439 Dy4A O448 144.3 . . ? 
O312 Dy4A O448 144.9 . . ? 
O518 Dy4A Dy5A 77.8 . . ? 
O374 Dy4A Dy5A 155.5 . . ? 
O530 Dy4A Dy5A 37.9 . . ? 
O485 Dy4A Dy5A 60.4 . . ? 
O473 Dy4A Dy5A 129.1 . . ? 
O439 Dy4A Dy5A 37.3 . . ? 
O312 Dy4A Dy5A 103.5 . . ? 
O448 Dy4A Dy5A 109.1 . . ? 
O518 Dy4A Dy90 36.7 . . ? 
O374 Dy4A Dy90 102.9 . . ? 
O530 Dy4A Dy90 35.9 . . ? 
O485 Dy4A Dy90 108.1 . . ? 
O473 Dy4A Dy90 145.6 . . ? 
O439 Dy4A Dy90 76.2 . . ? 
O312 Dy4A Dy90 136.5 . . ? 
O448 Dy4A Dy90 73.5 . . ? 
Dy5A Dy4A Dy90 60.0 . . ? 
O518 Dy4A Dy86 36.4 . . ? 
O374 Dy4A Dy86 96.4 . . ? 
O530 Dy4A Dy86 76.8 . . ? 
O485 Dy4A Dy86 115.3 . . ? 
O473 Dy4A Dy86 154.8 . . ? 
O439 Dy4A Dy86 36.2 . . ? 
O312 Dy4A Dy86 77.8 . . ? 
O448 Dy4A Dy86 130.1 . . ? 
Dy5A Dy4A Dy86 60.3 . . ? 
Dy90 Dy4A Dy86 59.0 . . ? 
O518 Dy4A Dy97 124.6 . . ? 
O374 Dy4A Dy97 70.1 . . ? 
O530 Dy4A Dy97 102.5 . . ? 
O485 Dy4A Dy97 82.3 . . ? 
O473 Dy4A Dy97 37.1 . . ? 
O439 Dy4A Dy97 162.3 . . ? 
O312 Dy4A Dy97 111.0 . . ? 
O448 Dy4A Dy97 35.7 . . ? 
Dy5A Dy4A Dy97 130.0 . . ? 
Dy90 Dy4A Dy97 109.1 . . ? 
Dy86 Dy4A Dy97 160.5 . . ? 
O70 Dy4 O14 73.2 . . ? 
O70 Dy4 O181 143.3 . . ? 
O14 Dy4 O181 114.3 . . ? 
O70 Dy4 O73 121.6 . . ? 
O14 Dy4 O73 138.0 . . ? 
O181 Dy4 O73 78.2 . . ? 
O70 Dy4 O37 137.6 . . ? 
O14 Dy4 O37 70.5 . . ? 
O181 Dy4 O37 73.6 . . ? 
O73 Dy4 O37 76.0 . . ? 
O70 Dy4 O174 79.5 . . ? 
O14 Dy4 O174 140.1 . . ? 
O181 Dy4 O174 73.2 . . ? 
O73 Dy4 O174 81.4 . . ? 
O37 Dy4 O174 142.8 . . ? 
O70 Dy4 O190 79.4 . . ? 
O14 Dy4 O190 75.8 . . ? 
O181 Dy4 O190 68.9 . . ? 
O73 Dy4 O190 141.6 . . ? 
O37 Dy4 O190 111.4 . . ? 
O174 Dy4 O190 70.9 . . ? 
O70 Dy4 O44 70.6 . . ? 
O14 Dy4 O44 78.7 . . ? 
O181 Dy4 O44 144.8 . . ? 
O73 Dy4 O44 71.9 . . ? 
O37 Dy4 O44 81.4 . . ? 
O174 Dy4 O44 118.9 . . ? 
O190 Dy4 O44 145.1 . . ? 
O70 Dy4 Dy47 117.8 . . ? 
O14 Dy4 Dy47 148.6 . . ? 
O181 Dy4 Dy47 38.7 . . ? 
O73 Dy4 Dy47 64.2 . . ? 
O37 Dy4 Dy47 104.6 . . ? 
O174 Dy4 Dy47 38.4 . . ? 
O190 Dy4 Dy47 77.7 . . ? 
O44 Dy4 Dy47 132.3 . . ? 
O70 Dy4 Dy49 67.1 . . ? 
O14 Dy4 Dy49 104.2 . . ? 
O181 Dy4 Dy49 76.4 . . ? 
O73 Dy4 Dy49 117.8 . . ? 
O37 Dy4 Dy49 143.3 . . ? 
O174 Dy4 Dy49 37.0 . . ? 
O190 Dy4 Dy49 36.2 . . ? 
O44 Dy4 Dy49 134.4 . . ? 
Dy47 Dy4 Dy49 60.5 . . ? 
O70 Dy4 Dy18 115.6 . . ? 
O14 Dy4 Dy18 88.8 . . ? 
O181 Dy4 Dy18 34.8 . . ? 
O73 Dy4 Dy18 112.8 . . ? 
O37 Dy4 Dy18 84.9 . . ? 
O174 Dy4 Dy18 77.2 . . ? 
O190 Dy4 Dy18 36.3 . . ? 
O44 Dy4 Dy18 163.9 . . ? 
Dy47 Dy4 Dy18 59.7 . . ? 
Dy49 Dy4 Dy18 58.4 . . ? 
O439 Dy5A O395 88.3 . . ? 
O439 Dy5A O503 71.5 . . ? 
O395 Dy5A O503 77.8 . . ? 
O439 Dy5A O530 72.8 . . ? 
O395 Dy5A O530 147.2 . . ? 
O503 Dy5A O530 70.9 . . ? 
O439 Dy5A O401 140.3 . . ? 
O395 Dy5A O401 115.3 . . ? 
O503 Dy5A O401 82.4 . . ? 
O530 Dy5A O401 70.6 . . ? 
O439 Dy5A O480 155.1 . . ? 
O395 Dy5A O480 76.9 . . ? 
O503 Dy5A O480 123.2 . . ? 
O530 Dy5A O480 129.1 . . ? 
O401 Dy5A O480 64.6 . . ? 
O439 Dy5A O515 104.9 . . ? 
O395 Dy5A O515 135.0 . . ? 
O503 Dy5A O515 147.2 . . ? 
O530 Dy5A O515 76.9 . . ? 
O401 Dy5A O515 81.4 . . ? 
O480 Dy5A O515 73.8 . . ? 
O439 Dy5A O364 70.7 . . ? 
O395 Dy5A O364 72.8 . . ? 
O503 Dy5A O364 132.1 . . ? 
O530 Dy5A O364 122.5 . . ? 
O401 Dy5A O364 144.6 . . ? 
O480 Dy5A O364 85.8 . . ? 
O515 Dy5A O364 71.6 . . ? 
O439 Dy5A Dy4A 39.2 . . ? 
O395 Dy5A Dy4A 127.2 . . ? 
O503 Dy5A Dy4A 79.3 . . ? 
O530 Dy5A Dy4A 37.4 . . ? 
O401 Dy5A Dy4A 107.8 . . ? 
O480 Dy5A Dy4A 152.4 . . ? 
O515 Dy5A Dy4A 78.8 . . ? 
O364 Dy5A Dy4A 89.3 . . ? 
O439 Dy5A Dy90 78.0 . . ? 
O395 Dy5A Dy90 114.1 . . ? 
O503 Dy5A Dy90 36.5 . . ? 
O530 Dy5A Dy90 36.8 . . ? 
O401 Dy5A Dy90 63.5 . . ? 
O480 Dy5A Dy90 126.2 . . ? 
O515 Dy5A Dy90 110.8 . . ? 
O364 Dy5A Dy90 147.8 . . ? 
Dy4A Dy5A Dy90 61.0 . . ? 
O439 Dy5A Dy86 35.9 . . ? 
O395 Dy5A Dy86 72.2 . . ? 
O503 Dy5A Dy86 37.7 . . ? 
O530 Dy5A Dy86 77.1 . . ? 
O401 Dy5A Dy86 118.8 . . ? 
O480 Dy5A Dy86 146.7 . . ? 
O515 Dy5A Dy86 138.4 . . ? 
O364 Dy5A Dy86 96.6 . . ? 
Dy4A Dy5A Dy86 60.9 . . ? 
Dy90 Dy5A Dy86 59.5 . . ? 
O439 Dy5A Dy3A 133.5 . . ? 
O395 Dy5A Dy3A 104.9 . . ? 
O503 Dy5A Dy3A 154.4 . . ? 
O530 Dy5A Dy3A 107.6 . . ? 
O401 Dy5A Dy3A 73.4 . . ? 
O480 Dy5A Dy3A 37.4 . . ? 
O515 Dy5A Dy3A 36.9 . . ? 
O364 Dy5A Dy3A 71.2 . . ? 
Dy4A Dy5A Dy3A 115.7 . . ? 
Dy90 Dy5A Dy3A 130.8 . . ? 
Dy86 Dy5A Dy3A 167.6 . . ? 
O230 Dy5 O161 91.4 . . ? 
O230 Dy5 O148 142.7 . . ? 
O161 Dy5 O148 101.7 . . ? 
O230 Dy5 O254 68.7 . . ? 
O161 Dy5 O254 144.4 . . ? 
O148 Dy5 O254 81.2 . . ? 
O230 Dy5 O21 98.0 . . ? 
O161 Dy5 O21 144.1 . . ? 
O148 Dy5 O21 91.6 . . ? 
O254 Dy5 O21 70.3 . . ? 
O230 Dy5 O146 145.4 . . ? 
O161 Dy5 O146 76.4 . . ? 
O148 Dy5 O146 71.9 . . ? 
O254 Dy5 O146 136.0 . . ? 
O21 Dy5 O146 76.3 . . ? 
O230 Dy5 O240 70.6 . . ? 
O161 Dy5 O240 76.2 . . ? 
O148 Dy5 O240 78.8 . . ? 
O254 Dy5 O240 69.5 . . ? 
O21 Dy5 O240 139.5 . . ? 
O146 Dy5 O240 134.3 . . ? 
O230 Dy5 O56 72.7 . . ? 
O161 Dy5 O56 73.6 . . ? 
O148 Dy5 O56 144.5 . . ? 
O254 Dy5 O56 123.5 . . ? 
O21 Dy5 O56 76.3 . . ? 
O146 Dy5 O56 72.8 . . ? 
O240 Dy5 O56 131.2 . . ? 
O230 Dy5 Dy20 37.2 . . ? 
O161 Dy5 Dy20 70.1 . . ? 
O148 Dy5 Dy20 116.1 . . ? 
O254 Dy5 Dy20 76.8 . . ? 
O21 Dy5 Dy20 132.6 . . ? 
O146 Dy5 Dy20 146.5 . . ? 
O240 Dy5 Dy20 37.3 . . ? 
O56 Dy5 Dy20 95.8 . . ? 
O230 Dy5 Dy33 76.6 . . ? 
O161 Dy5 Dy33 112.3 . . ? 
O148 Dy5 Dy33 66.1 . . ? 
O254 Dy5 Dy33 36.2 . . ? 
O21 Dy5 Dy33 103.7 . . ? 
O146 Dy5 Dy33 138.0 . . ? 
O240 Dy5 Dy33 36.6 . . ? 
O56 Dy5 Dy33 148.9 . . ? 
Dy20 Dy5 Dy33 60.9 . . ? 
O230 Dy5 Dy38 34.9 . . ? 
O161 Dy5 Dy38 125.0 . . ? 
O148 Dy5 Dy38 116.7 . . ? 
O254 Dy5 Dy38 35.8 . . ? 
O21 Dy5 Dy38 75.3 . . ? 
O146 Dy5 Dy38 150.5 . . ? 
O240 Dy5 Dy38 74.5 . . ? 
O56 Dy5 Dy38 92.7 . . ? 
Dy20 Dy5 Dy38 58.3 . . ? 
Dy33 Dy5 Dy38 58.2 . . ? 
O100 Dy6 O47 80.1 . . ? 
O100 Dy6 O109 141.7 . . ? 
O47 Dy6 O109 110.3 . . ? 
O100 Dy6 O95 104.3 . . ? 
O47 Dy6 O95 141.0 . . ? 
O109 Dy6 O95 90.3 . . ? 
O100 Dy6 O243 79.1 . . ? 
O47 Dy6 O243 140.2 . . ? 
O109 Dy6 O243 69.8 . . ? 
O95 Dy6 O243 77.4 . . ? 
O100 Dy6 O63 141.7 . . ? 
O47 Dy6 O63 76.8 . . ? 
O109 Dy6 O63 75.6 . . ? 
O95 Dy6 O63 76.9 . . ? 
O243 Dy6 O63 136.3 . . ? 
O100 Dy6 O198 81.8 . . ? 
O47 Dy6 O198 73.1 . . ? 
O109 Dy6 O198 67.5 . . ? 
O95 Dy6 O198 145.7 . . ? 
O243 Dy6 O198 70.6 . . ? 
O63 Dy6 O198 119.1 . . ? 
O100 Dy6 O218 68.9 . . ? 
O47 Dy6 O218 77.5 . . ? 
O109 Dy6 O218 148.3 . . ? 
O95 Dy6 O218 68.8 . . ? 
O243 Dy6 O218 124.5 . . ? 
O63 Dy6 O218 76.5 . . ? 
O198 Dy6 O218 141.4 . . ? 
O100 Dy6 Dy41 116.2 . . ? 
O47 Dy6 Dy41 142.8 . . ? 
O109 Dy6 Dy41 36.4 . . ? 
O95 Dy6 Dy41 70.5 . . ? 
O243 Dy6 Dy41 37.1 . . ? 
O63 Dy6 Dy41 100.5 . . ? 
O198 Dy6 Dy41 76.5 . . ? 
O218 Dy6 Dy41 138.7 . . ? 
O100 Dy6 Dy17 65.4 . . ? 
O47 Dy6 Dy17 102.8 . . ? 
O109 Dy6 Dy17 76.3 . . ? 
O95 Dy6 Dy17 114.4 . . ? 
O243 Dy6 Dy17 37.5 . . ? 
O63 Dy6 Dy17 149.7 . . ? 
O198 Dy6 Dy17 37.1 . . ? 
O218 Dy6 Dy17 133.4 . . ? 
Dy41 Dy6 Dy17 61.3 . . ? 
O100 Dy6 Dy15 116.3 . . ? 
O47 Dy6 Dy15 85.9 . . ? 
O109 Dy6 Dy15 34.0 . . ? 
O95 Dy6 Dy15 123.3 . . ? 
O243 Dy6 Dy15 73.6 . . ? 
O63 Dy6 Dy15 92.1 . . ? 
O198 Dy6 Dy15 35.0 . . ? 
O218 Dy6 Dy15 161.6 . . ? 
Dy41 Dy6 Dy15 57.0 . . ? 
Dy17 Dy6 Dy15 57.9 . . ? 
O165 Dy7 O212 148.9 . . ? 
O165 Dy7 O265 123.3 . . ? 
O212 Dy7 O265 72.8 . . ? 
O165 Dy7 O22 74.6 . . ? 
O212 Dy7 O22 107.1 . . ? 
O265 Dy7 O22 146.3 . . ? 
O165 Dy7 O170 72.1 . . ? 
O212 Dy7 O170 137.7 . . ? 
O265 Dy7 O170 71.3 . . ? 
O22 Dy7 O170 91.2 . . ? 
O165 Dy7 O250 127.4 . . ? 
O212 Dy7 O250 80.7 . . ? 
O265 Dy7 O250 73.9 . . ? 
O22 Dy7 O250 72.9 . . ? 
O170 Dy7 O250 68.5 . . ? 
O165 Dy7 O248 82.2 . . ? 
O212 Dy7 O248 68.0 . . ? 
O265 Dy7 O248 127.5 . . ? 
O22 Dy7 O248 79.6 . . ? 
O170 Dy7 O248 154.2 . . ? 
O250 Dy7 O248 129.6 . . ? 
O165 Dy7 O238 74.2 . . ? 
O212 Dy7 O238 87.7 . . ? 
O265 Dy7 O238 73.3 . . ? 
O22 Dy7 O238 139.9 . . ? 
O170 Dy7 O238 102.6 . . ? 
O250 Dy7 O238 147.2 . . ? 
O248 Dy7 O238 71.7 . . ? 
O165 Dy7 Dy22 149.5 . . ? 
O212 Dy7 Dy22 60.4 . . ? 
O265 Dy7 Dy22 39.0 . . ? 
O22 Dy7 Dy22 110.4 . . ? 
O170 Dy7 Dy22 77.6 . . ? 
O250 Dy7 Dy22 38.8 . . ? 
O248 Dy7 Dy22 128.1 . . ? 
O238 Dy7 Dy22 109.3 . . ? 
O165 Dy7 Dy12 90.9 . . ? 
O212 Dy7 Dy12 109.4 . . ? 
O265 Dy7 Dy12 36.6 . . ? 
O22 Dy7 Dy12 129.0 . . ? 
O170 Dy7 Dy12 38.4 . . ? 
O250 Dy7 Dy12 79.1 . . ? 
O248 Dy7 Dy12 147.7 . . ? 
O238 Dy7 Dy12 76.0 . . ? 
Dy22 Dy7 Dy12 62.0 . . ? 
O165 Dy7 Dy2 116.9 . . ? 
O212 Dy7 Dy2 35.8 . . ? 
O265 Dy7 Dy2 107.2 . . ? 
O22 Dy7 Dy2 83.8 . . ? 
O170 Dy7 Dy2 167.7 . . ? 
O250 Dy7 Dy2 99.3 . . ? 
O248 Dy7 Dy2 35.3 . . ? 
O238 Dy7 Dy2 88.4 . . ? 
Dy22 Dy7 Dy2 93.6 . . ? 
Dy12 Dy7 Dy2 143.3 . . ? 
O165 Dy7 Dy11 95.9 . . ? 
O212 Dy7 Dy11 114.6 . . ? 
O265 Dy7 Dy11 76.4 . . ? 
O22 Dy7 Dy11 73.3 . . ? 
O170 Dy7 Dy11 34.6 . . ? 
O250 Dy7 Dy11 35.3 . . ? 
O248 Dy7 Dy11 152.3 . . ? 
O238 Dy7 Dy11 134.6 . . ? 
Dy22 Dy7 Dy11 59.4 . . ? 
Dy12 Dy7 Dy11 59.6 . . ? 
Dy2 Dy7 Dy11 133.1 . . ? 
O204 Dy8 O162 78.3 . . ? 
O204 Dy8 O54 145.6 . . ? 
O162 Dy8 O54 73.1 . . ? 
O204 Dy8 O35 90.0 . . ? 
O162 Dy8 O35 75.3 . . ? 
O54 Dy8 O35 100.7 . . ? 
O204 Dy8 O144 95.2 . . ? 
O162 Dy8 O144 147.1 . . ? 
O54 Dy8 O144 98.5 . . ? 
O35 Dy8 O144 137.3 . . ? 
O204 Dy8 O132 80.8 . . ? 
O162 Dy8 O132 71.4 . . ? 
O54 Dy8 O132 72.3 . . ? 
O35 Dy8 O132 146.6 . . ? 
O144 Dy8 O132 75.8 . . ? 
O204 Dy8 O32 145.5 . . ? 
O162 Dy8 O32 124.3 . . ? 
O54 Dy8 O32 68.6 . . ? 
O35 Dy8 O32 73.9 . . ? 
O144 Dy8 O32 78.4 . . ? 
O132 Dy8 O32 128.6 . . ? 
O204 Dy8 O62 71.2 . . ? 
O162 Dy8 O62 132.5 . . ? 
O54 Dy8 O62 143.1 . . ? 
O35 Dy8 O62 69.3 . . ? 
O144 Dy8 O62 72.5 . . ? 
O132 Dy8 O62 134.9 . . ? 
O32 Dy8 O62 74.5 . . ? 
O204 Dy8 Dy1 116.7 . . ? 
O162 Dy8 Dy1 38.5 . . ? 
O54 Dy8 Dy1 38.8 . . ? 
O35 Dy8 Dy1 74.9 . . ? 
O144 Dy8 Dy1 136.5 . . ? 
O132 Dy8 Dy1 80.8 . . ? 
O32 Dy8 Dy1 88.8 . . ? 
O62 Dy8 Dy1 143.5 . . ? 
O204 Dy8 Dy9 119.0 . . ? 
O162 Dy8 Dy9 79.5 . . ? 
O54 Dy8 Dy9 37.2 . . ? 
O35 Dy8 Dy9 136.4 . . ? 
O144 Dy8 Dy9 75.7 . . ? 
O132 Dy8 Dy9 38.3 . . ? 
O32 Dy8 Dy9 92.5 . . ? 
O62 Dy8 Dy9 147.4 . . ? 
Dy1 Dy8 Dy9 63.3 . . ? 
O204 Dy8 Dy13 69.2 . . ? 
O162 Dy8 Dy13 35.8 . . ? 
O54 Dy8 Dy13 76.4 . . ? 
O35 Dy8 Dy13 109.8 . . ? 
O144 Dy8 Dy13 111.6 . . ? 
O132 Dy8 Dy13 37.0 . . ? 
O32 Dy8 Dy13 144.8 . . ? 
O62 Dy8 Dy13 140.4 . . ? 
Dy1 Dy8 Dy13 60.2 . . ? 
Dy9 Dy8 Dy13 60.0 . . ? 
O204 Dy8 Dy31 86.2 . . ? 
O162 Dy8 Dy31 164.1 . . ? 
O54 Dy8 Dy31 122.6 . . ? 
O35 Dy8 Dy31 101.5 . . ? 
O144 Dy8 Dy31 37.1 . . ? 
O132 Dy8 Dy31 109.7 . . ? 
O32 Dy8 Dy31 68.1 . . ? 
O62 Dy8 Dy31 36.0 . . ? 
Dy1 Dy8 Dy31 156.5 . . ? 
Dy9 Dy8 Dy31 111.5 . . ? 
Dy13 Dy8 Dy31 139.5 . . ? 
O54 Dy9 O128 141.3 . . ? 
O54 Dy9 O65 79.0 . . ? 
O128 Dy9 O65 137.3 . . ? 
O54 Dy9 O66 116.0 . . ? 
O128 Dy9 O66 74.6 . . ? 
O65 Dy9 O66 73.1 . . ? 
O54 Dy9 O132 73.5 . . ? 
O128 Dy9 O132 76.0 . . ? 
O65 Dy9 O132 144.9 . . ? 
O66 Dy9 O132 139.1 . . ? 
O54 Dy9 O68 68.0 . . ? 
O128 Dy9 O68 80.3 . . ? 
O65 Dy9 O68 116.9 . . ? 
O66 Dy9 O68 75.6 . . ? 
O132 Dy9 O68 71.9 . . ? 
O54 Dy9 O82 81.9 . . ? 
O128 Dy9 O82 115.1 . . ? 
O65 Dy9 O82 75.6 . . ? 
O66 Dy9 O82 139.4 . . ? 
O132 Dy9 O82 79.3 . . ? 
O68 Dy9 O82 142.9 . . ? 
O54 Dy9 O214 145.8 . . ? 
O128 Dy9 O214 64.8 . . ? 
O65 Dy9 O214 87.6 . . ? 
O66 Dy9 O214 89.2 . . ? 
O132 Dy9 O214 103.2 . . ? 
O68 Dy9 O214 144.7 . . ? 
O82 Dy9 O214 64.2 . . ? 
O54 Dy9 Dy8 37.7 . . ? 
O128 Dy9 Dy8 114.9 . . ? 
O65 Dy9 Dy8 107.3 . . ? 
O66 Dy9 Dy8 148.5 . . ? 
O132 Dy9 Dy8 39.0 . . ? 
O68 Dy9 Dy8 76.6 . . ? 
O82 Dy9 Dy8 66.4 . . ? 
O214 Dy9 Dy8 122.3 . . ? 
O54 Dy9 Dy13 77.7 . . ? 
O128 Dy9 Dy13 63.6 . . ? 
O65 Dy9 Dy13 151.3 . . ? 
O66 Dy9 Dy13 102.7 . . ? 
O132 Dy9 Dy13 37.7 . . ? 
O68 Dy9 Dy13 37.5 . . ? 
O82 Dy9 Dy13 117.0 . . ? 
O214 Dy9 Dy13 121.0 . . ? 
Dy8 Dy9 Dy13 61.3 . . ? 
O54 Dy9 Dy1 34.6 . . ? 
O128 Dy9 Dy1 114.9 . . ? 
O65 Dy9 Dy1 92.5 . . ? 
O66 Dy9 Dy1 90.4 . . ? 
O132 Dy9 Dy1 76.9 . . ? 
O68 Dy9 Dy1 35.0 . . ? 
O82 Dy9 Dy1 116.2 . . ? 
O214 Dy9 Dy1 179.6 . . ? 
Dy8 Dy9 Dy1 58.1 . . ? 
Dy13 Dy9 Dy1 58.9 . . ? 
O41 Dy10 O228 123.9 . . ? 
O41 Dy10 O18 80.5 . . ? 
O228 Dy10 O18 152.1 . . ? 
O41 Dy10 O27 80.4 . . ? 
O228 Dy10 O27 133.7 . . ? 
O18 Dy10 O27 57.2 . . ? 
O41 Dy10 O216 126.7 . . ? 
O228 Dy10 O216 79.8 . . ? 
O18 Dy10 O216 73.9 . . ? 
O27 Dy10 O216 119.4 . . ? 
O41 Dy10 O60 81.0 . . ? 
O228 Dy10 O60 72.6 . . ? 
O18 Dy10 O60 129.7 . . ? 
O27 Dy10 O60 73.9 . . ? 
O216 Dy10 O60 149.3 . . ? 
O41 Dy10 O225 159.6 . . ? 
O228 Dy10 O225 69.4 . . ? 
O18 Dy10 O225 91.8 . . ? 
O27 Dy10 O225 79.6 . . ? 
O216 Dy10 O225 67.8 . . ? 
O60 Dy10 O225 89.8 . . ? 
O41 Dy10 O271 79.4 . . ? 
O228 Dy10 O271 86.2 . . ? 
O18 Dy10 O271 85.4 . . ? 
O27 Dy10 O271 139.8 . . ? 
O216 Dy10 O271 53.0 . . ? 
O60 Dy10 O271 135.5 . . ? 
O225 Dy10 O271 119.1 . . ? 
O41 Dy10 C151 77.8 . . ? 
O228 Dy10 C151 154.2 . . ? 
O18 Dy10 C151 29.9 . . ? 
O27 Dy10 C151 27.3 . . ? 
O216 Dy10 C151 98.7 . . ? 
O60 Dy10 C151 100.3 . . ? 
O225 Dy10 C151 86.1 . . ? 
O271 Dy10 C151 113.8 . . ? 
O41 Dy10 O209 75.4 . . ? 
O228 Dy10 O209 50.0 . . ? 
O18 Dy10 O209 143.4 . . ? 
O27 Dy10 O209 141.4 . . ? 
O216 Dy10 O209 99.3 . . ? 
O60 Dy10 O209 73.0 . . ? 
O225 Dy10 O209 119.3 . . ? 
O271 Dy10 O209 63.6 . . ? 
C151 Dy10 O209 153.1 . . ? 
O41 Dy10 N77 103.6 . . ? 
O228 Dy10 N77 82.2 . . ? 
O18 Dy10 N77 78.3 . . ? 
O27 Dy10 N77 134.3 . . ? 
O216 Dy10 N77 26.2 . . ? 
O60 Dy10 N77 151.7 . . ? 
O225 Dy10 N77 93.2 . . ? 
O271 Dy10 N77 26.8 . . ? 
C151 Dy10 N77 107.9 . . ? 
O209 Dy10 N77 81.2 . . ? 
O41 Dy10 Dy48 149.6 . . ? 
O228 Dy10 Dy48 35.5 . . ? 
O18 Dy10 Dy48 127.2 . . ? 
O27 Dy10 Dy48 103.1 . . ? 
O216 Dy10 Dy48 78.5 . . ? 
O60 Dy10 Dy48 71.3 . . ? 
O225 Dy10 Dy48 35.6 . . ? 
O271 Dy10 Dy48 111.9 . . ? 
C151 Dy10 Dy48 118.7 . . ? 
O209 Dy10 Dy48 84.5 . . ? 
N77 Dy10 Dy48 95.4 . . ? 
O170 Dy11 O200 146.6 . . ? 
O170 Dy11 O250 70.1 . . ? 
O200 Dy11 O250 85.7 . . ? 
O170 Dy11 O26 129.8 . . ? 
O200 Dy11 O26 82.5 . . ? 
O250 Dy11 O26 147.8 . . ? 
O170 Dy11 O172 87.9 . . ? 
O200 Dy11 O172 97.4 . . ? 
O250 Dy11 O172 140.5 . . ? 
O26 Dy11 O172 71.0 . . ? 
O170 Dy11 O259 71.2 . . ? 
O200 Dy11 O259 79.8 . . ? 
O250 Dy11 O259 72.3 . . ? 
O26 Dy11 O259 134.0 . . ? 
O172 Dy11 O259 69.6 . . ? 
O170 Dy11 O108 117.0 . . ? 
O200 Dy11 O108 75.6 . . ? 
O250 Dy11 O108 74.2 . . ? 
O26 Dy11 O108 73.9 . . ? 
O172 Dy11 O108 144.8 . . ? 
O259 Dy11 O108 139.4 . . ? 
O170 Dy11 O78 69.6 . . ? 
O200 Dy11 O78 143.4 . . ? 
O250 Dy11 O78 114.1 . . ? 
O26 Dy11 O78 64.2 . . ? 
O172 Dy11 O78 86.2 . . ? 
O259 Dy11 O78 134.3 . . ? 
O108 Dy11 O78 80.7 . . ? 
O170 Dy11 Dy22 77.0 . . ? 
O200 Dy11 Dy22 69.9 . . ? 
O250 Dy11 Dy22 37.6 . . ? 
O26 Dy11 Dy22 152.0 . . ? 
O172 Dy11 Dy22 107.0 . . ? 
O259 Dy11 Dy22 37.6 . . ? 
O108 Dy11 Dy22 102.8 . . ? 
O78 Dy11 Dy22 143.6 . . ? 
O170 Dy11 Dy12 37.1 . . ? 
O200 Dy11 Dy12 117.3 . . ? 
O250 Dy11 Dy12 78.6 . . ? 
O26 Dy11 Dy12 133.2 . . ? 
O172 Dy11 Dy12 64.9 . . ? 
O259 Dy11 Dy12 37.5 . . ? 
O108 Dy11 Dy12 148.9 . . ? 
O78 Dy11 Dy12 97.3 . . ? 
Dy22 Dy11 Dy12 61.1 . . ? 
O170 Dy11 Dy7 35.4 . . ? 
O200 Dy11 Dy7 121.4 . . ? 
O250 Dy11 Dy7 36.3 . . ? 
O26 Dy11 Dy7 147.8 . . ? 
O172 Dy11 Dy7 121.0 . . ? 
O259 Dy11 Dy7 75.4 . . ? 
O108 Dy11 Dy7 90.6 . . ? 
O78 Dy11 Dy7 85.9 . . ? 
Dy22 Dy11 Dy7 58.1 . . ? 
Dy12 Dy11 Dy7 58.4 . . ? 
O113 Dy12 O265 75.1 . . ? 
O113 Dy12 O543 143.4 . . ? 
O265 Dy12 O543 137.1 . . ? 
O113 Dy12 O259 141.8 . . ? 
O265 Dy12 O259 70.5 . . ? 
O543 Dy12 O259 74.7 . . ? 
O113 Dy12 O170 82.6 . . ? 
O265 Dy12 O170 71.8 . . ? 
O543 Dy12 O170 119.3 . . ? 
O259 Dy12 O170 71.5 . . ? 
O113 Dy12 O92 78.4 . . ? 
O265 Dy12 O92 134.9 . . ? 
O543 Dy12 O92 82.9 . . ? 
O259 Dy12 O92 115.7 . . ? 
O170 Dy12 O92 69.1 . . ? 
O113 Dy12 O269 95.4 . . ? 
O265 Dy12 O269 75.6 . . ? 
O543 Dy12 O269 81.3 . . ? 
O259 Dy12 O269 91.7 . . ? 
O170 Dy12 O269 146.7 . . ? 
O92 Dy12 O269 143.2 . . ? 
O113 Dy12 O205 70.3 . . ? 
O265 Dy12 O205 127.7 . . ? 
O543 Dy12 O205 74.4 . . ? 
O259 Dy12 O205 146.1 . . ? 
O170 Dy12 O205 137.6 . . ? 
O92 Dy12 O205 73.8 . . ? 
O269 Dy12 O205 70.1 . . ? 
O113 Dy12 Dy7 63.7 . . ? 
O265 Dy12 Dy7 37.0 . . ? 
O543 Dy12 Dy7 150.9 . . ? 
O259 Dy12 Dy7 78.8 . . ? 
O170 Dy12 Dy7 38.5 . . ? 
O92 Dy12 Dy7 98.3 . . ? 
O269 Dy12 Dy7 111.4 . . ? 
O205 Dy12 Dy7 134.0 . . ? 
O113 Dy12 Dy11 118.6 . . ? 
O265 Dy12 Dy11 78.5 . . ? 
O543 Dy12 Dy11 89.6 . . ? 
O259 Dy12 Dy11 38.5 . . ? 
O170 Dy12 Dy11 36.4 . . ? 
O92 Dy12 Dy11 83.1 . . ? 
O269 Dy12 Dy11 129.6 . . ? 
O205 Dy12 Dy11 153.1 . . ? 
Dy7 Dy12 Dy11 62.0 . . ? 
O113 Dy12 Dy22 111.2 . . ? 
O265 Dy12 Dy22 36.2 . . ? 
O543 Dy12 Dy22 103.1 . . ? 
O259 Dy12 Dy22 35.7 . . ? 
O170 Dy12 Dy22 75.0 . . ? 
O92 Dy12 Dy22 141.3 . . ? 
O269 Dy12 Dy22 74.9 . . ? 
O205 Dy12 Dy22 144.9 . . ? 
Dy7 Dy12 Dy22 58.6 . . ? 
Dy11 Dy12 Dy22 59.0 . . ? 
O113 Dy12 Dy21 85.8 . . ? 
O265 Dy12 Dy21 105.7 . . ? 
O543 Dy12 Dy21 70.6 . . ? 
O259 Dy12 Dy21 119.0 . . ? 
O170 Dy12 Dy21 168.3 . . ? 
O92 Dy12 Dy21 108.0 . . ? 
O269 Dy12 Dy21 35.3 . . ? 
O205 Dy12 Dy21 35.3 . . ? 
Dy7 Dy12 Dy21 134.6 . . ? 
Dy11 Dy12 Dy21 155.2 . . ? 
Dy22 Dy12 Dy21 110.1 . . ? 
O48 Dy13 O162 76.6 . . ? 
O48 Dy13 O68 94.8 . . ? 
O162 Dy13 O68 71.0 . . ? 
O48 Dy13 O132 147.9 . . ? 
O162 Dy13 O132 71.6 . . ? 
O68 Dy13 O132 71.4 . . ? 
O48 Dy13 O238 136.8 . . ? 
O162 Dy13 O238 146.6 . . ? 
O68 Dy13 O238 99.7 . . ? 
O132 Dy13 O238 75.1 . . ? 
O48 Dy13 O248 72.2 . . ? 
O162 Dy13 O248 132.2 . . ? 
O68 Dy13 O248 145.7 . . ? 
O132 Dy13 O248 134.3 . . ? 
O238 Dy13 O248 73.1 . . ? 
O48 Dy13 O99 73.5 . . ? 
O162 Dy13 O99 126.6 . . ? 
O68 Dy13 O99 68.7 . . ? 
O132 Dy13 O99 123.7 . . ? 
O238 Dy13 O99 74.4 . . ? 
O248 Dy13 O99 77.2 . . ? 
O48 Dy13 O79 96.1 . . ? 
O162 Dy13 O79 81.5 . . ? 
O68 Dy13 O79 147.2 . . ? 
O132 Dy13 O79 83.2 . . ? 
O238 Dy13 O79 93.3 . . ? 
O248 Dy13 O79 67.0 . . ? 
O99 Dy13 O79 144.2 . . ? 
O48 Dy13 Dy9 131.5 . . ? 
O162 Dy13 Dy9 78.5 . . ? 
O68 Dy13 Dy9 37.4 . . ? 
O132 Dy13 Dy9 37.3 . . ? 
O238 Dy13 Dy9 76.0 . . ? 
O248 Dy13 Dy9 148.6 . . ? 
O99 Dy13 Dy9 89.6 . . ? 
O79 Dy13 Dy9 120.5 . . ? 
O48 Dy13 Dy1 72.9 . . ? 
O162 Dy13 Dy1 37.1 . . ? 
O68 Dy13 Dy1 37.5 . . ? 
O132 Dy13 Dy1 79.3 . . ? 
O238 Dy13 Dy1 136.0 . . ? 
O248 Dy13 Dy1 145.1 . . ? 
O99 Dy13 Dy1 91.6 . . ? 
O79 Dy13 Dy1 118.6 . . ? 
Dy9 Dy13 Dy1 62.2 . . ? 
O48 Dy13 Dy8 112.0 . . ? 
O162 Dy13 Dy8 35.9 . . ? 
O68 Dy13 Dy8 74.5 . . ? 
O132 Dy13 Dy8 37.2 . . ? 
O238 Dy13 Dy8 111.1 . . ? 
O248 Dy13 Dy8 139.7 . . ? 
O99 Dy13 Dy8 143.1 . . ? 
O79 Dy13 Dy8 72.7 . . ? 
Dy9 Dy13 Dy8 58.7 . . ? 
Dy1 Dy13 Dy8 58.4 . . ? 
O48 Dy13 Dy7 103.4 . . ? 
O162 Dy13 Dy7 163.0 . . ? 
O68 Dy13 Dy7 125.5 . . ? 
O132 Dy13 Dy7 108.2 . . ? 
O238 Dy13 Dy7 36.9 . . ? 
O248 Dy13 Dy7 36.6 . . ? 
O99 Dy13 Dy7 68.3 . . ? 
O79 Dy13 Dy7 81.6 . . ? 
Dy9 Dy13 Dy7 112.0 . . ? 
Dy1 Dy13 Dy7 159.6 . . ? 
Dy8 Dy13 Dy7 137.8 . . ? 
O74 Dy14 O208 155.9 . . ? 
O74 Dy14 O187 131.9 . . ? 
O208 Dy14 O187 68.4 . . ? 
O74 Dy14 O76 81.1 . . ? 
O208 Dy14 O76 81.3 . . ? 
O187 Dy14 O76 146.5 . . ? 
O74 Dy14 O227 120.9 . . ? 
O208 Dy14 O227 69.4 . . ? 
O187 Dy14 O227 81.6 . . ? 
O76 Dy14 O227 74.4 . . ? 
O74 Dy14 O75 81.2 . . ? 
O208 Dy14 O75 77.7 . . ? 
O187 Dy14 O75 113.3 . . ? 
O76 Dy14 O75 71.8 . . ? 
O227 Dy14 O75 135.6 . . ? 
O74 Dy14 O121 81.0 . . ? 
O208 Dy14 O121 118.6 . . ? 
O187 Dy14 O121 82.0 . . ? 
O76 Dy14 O121 101.2 . . ? 
O227 Dy14 O121 53.5 . . ? 
O75 Dy14 O121 161.8 . . ? 
O74 Dy14 O42 85.6 . . ? 
O208 Dy14 O42 90.5 . . ? 
O187 Dy14 O42 72.3 . . ? 
O76 Dy14 O42 123.5 . . ? 
O227 Dy14 O42 151.7 . . ? 
O75 Dy14 O42 51.9 . . ? 
O121 Dy14 O42 130.5 . . ? 
O74 Dy14 C203 82.2 . . ? 
O208 Dy14 C203 84.6 . . ? 
O187 Dy14 C203 91.9 . . ? 
O76 Dy14 C203 99.4 . . ? 
O227 Dy14 C203 153.8 . . ? 
O75 Dy14 C203 27.8 . . ? 
O121 Dy14 C203 151.0 . . ? 
O42 Dy14 C203 24.2 . . ? 
O74 Dy14 O209 83.5 . . ? 
O208 Dy14 O209 117.3 . . ? 
O187 Dy14 O209 49.1 . . ? 
O76 Dy14 O209 158.6 . . ? 
O227 Dy14 O209 101.4 . . ? 
O75 Dy14 O209 120.3 . . ? 
O121 Dy14 O209 61.6 . . ? 
O42 Dy14 O209 69.6 . . ? 
C203 Dy14 O209 93.1 . . ? 
O74 Dy14 N75 102.8 . . ? 
O208 Dy14 N75 93.1 . . ? 
O187 Dy14 N75 79.4 . . ? 
O76 Dy14 N75 88.5 . . ? 
O227 Dy14 N75 26.3 . . ? 
O75 Dy14 N75 159.3 . . ? 
O121 Dy14 N75 27.2 . . ? 
O42 Dy14 N75 147.9 . . ? 
C203 Dy14 N75 171.3 . . ? 
O209 Dy14 N75 80.5 . . ? 
O74 Dy14 N65 107.1 . . ? 
O208 Dy14 N65 92.7 . . ? 
O187 Dy14 N65 24.8 . . ? 
O76 Dy14 N65 168.8 . . ? 
O227 Dy14 N65 94.7 . . ? 
O75 Dy14 N65 116.3 . . ? 
O121 Dy14 N65 73.3 . . ? 
O42 Dy14 N65 65.7 . . ? 
C203 Dy14 N65 89.4 . . ? 
O209 Dy14 N65 24.7 . . ? 
N75 Dy14 N65 82.3 . . ? 
O103 Dy15 O116 73.4 . . ? 
O103 Dy15 O246 140.6 . . ? 
O116 Dy15 O246 141.5 . . ? 
O103 Dy15 O57 140.2 . . ? 
O116 Dy15 O57 74.4 . . ? 
O246 Dy15 O57 78.4 . . ? 
O103 Dy15 O198 114.2 . . ? 
O116 Dy15 O198 76.5 . . ? 
O246 Dy15 O198 72.3 . . ? 
O57 Dy15 O198 79.9 . . ? 
O103 Dy15 O109 74.2 . . ? 
O116 Dy15 O109 114.7 . . ? 
O246 Dy15 O109 73.2 . . ? 
O57 Dy15 O109 141.9 . . ? 
O198 Dy15 O109 67.7 . . ? 
O103 Dy15 O173 77.0 . . ? 
O116 Dy15 O173 142.8 . . ? 
O246 Dy15 O173 74.9 . . ? 
O57 Dy15 O173 118.9 . . ? 
O198 Dy15 O173 137.4 . . ? 
O109 Dy15 O173 77.4 . . ? 
O103 Dy15 O106 86.1 . . ? 
O116 Dy15 O106 88.0 . . ? 
O246 Dy15 O106 107.6 . . ? 
O57 Dy15 O106 69.9 . . ? 
O198 Dy15 O106 149.0 . . ? 
O109 Dy15 O106 143.0 . . ? 
O173 Dy15 O106 67.7 . . ? 
O103 Dy15 Dy41 101.7 . . ? 
O116 Dy15 Dy41 149.7 . . ? 
O246 Dy15 Dy41 39.5 . . ? 
O57 Dy15 Dy41 117.8 . . ? 
O198 Dy15 Dy41 78.6 . . ? 
O109 Dy15 Dy41 38.1 . . ? 
O173 Dy15 Dy41 58.8 . . ? 
O106 Dy15 Dy41 121.9 . . ? 
O103 Dy15 Dy17 146.2 . . ? 
O116 Dy15 Dy17 105.0 . . ? 
O246 Dy15 Dy17 37.8 . . ? 
O57 Dy15 Dy17 65.7 . . ? 
O198 Dy15 Dy17 37.2 . . ? 
O109 Dy15 Dy17 76.3 . . ? 
O173 Dy15 Dy17 112.2 . . ? 
O106 Dy15 Dy17 127.7 . . ? 
Dy41 Dy15 Dy17 62.1 . . ? 
O103 Dy15 Dy6 87.7 . . ? 
O116 Dy15 Dy6 91.0 . . ? 
O246 Dy15 Dy6 76.8 . . ? 
O57 Dy15 Dy6 115.7 . . ? 
O198 Dy15 Dy6 36.1 . . ? 
O109 Dy15 Dy6 33.2 . . ? 
O173 Dy15 Dy6 110.0 . . ? 
O106 Dy15 Dy6 173.8 . . ? 
Dy41 Dy15 Dy6 58.8 . . ? 
Dy17 Dy15 Dy6 58.5 . . ? 
O23 Dy16 O38 78.0 . . ? 
O23 Dy16 O207 127.3 . . ? 
O38 Dy16 O207 153.1 . . ? 
O23 Dy16 O62 154.5 . . ? 
O38 Dy16 O62 95.8 . . ? 
O207 Dy16 O62 65.4 . . ? 
O23 Dy16 O204 129.5 . . ? 
O38 Dy16 O204 75.0 . . ? 
O207 Dy16 O204 80.4 . . ? 
O62 Dy16 O204 70.6 . . ? 
O23 Dy16 O50 80.8 . . ? 
O38 Dy16 O50 129.3 . . ? 
O207 Dy16 O50 70.5 . . ? 
O62 Dy16 O50 84.5 . . ? 
O204 Dy16 O50 147.7 . . ? 
O23 Dy16 O39 77.1 . . ? 
O38 Dy16 O39 77.1 . . ? 
O207 Dy16 O39 114.5 . . ? 
O62 Dy16 O39 77.4 . . ? 
O204 Dy16 O39 134.5 . . ? 
O50 Dy16 O39 53.4 . . ? 
O23 Dy16 O173 80.4 . . ? 
O38 Dy16 O173 135.2 . . ? 
O207 Dy16 O173 54.2 . . ? 
O62 Dy16 O173 118.9 . . ? 
O204 Dy16 O173 89.9 . . ? 
O50 Dy16 O173 84.4 . . ? 
O39 Dy16 O173 134.5 . . ? 
O23 Dy16 C250 76.3 . . ? 
O38 Dy16 C250 103.5 . . ? 
O207 Dy16 C250 92.9 . . ? 
O62 Dy16 C250 81.3 . . ? 
O204 Dy16 C250 151.4 . . ? 
O50 Dy16 C250 26.2 . . ? 
O39 Dy16 C250 27.3 . . ? 
O173 Dy16 C250 108.8 . . ? 
O23 Dy16 O106 82.3 . . ? 
O38 Dy16 O106 75.9 . . ? 
O207 Dy16 O106 96.5 . . ? 
O62 Dy16 O106 120.5 . . ? 
O204 Dy16 O106 50.2 . . ? 
O50 Dy16 O106 144.9 . . ? 
O39 Dy16 O106 148.8 . . ? 
O173 Dy16 O106 62.6 . . ? 
C250 Dy16 O106 158.1 . . ? 
O23 Dy16 N64 102.5 . . ? 
O38 Dy16 N64 155.9 . . ? 
O207 Dy16 N64 27.8 . . ? 
O62 Dy16 N64 93.2 . . ? 
O204 Dy16 N64 87.0 . . ? 
O50 Dy16 N64 73.8 . . ? 
O39 Dy16 N64 126.8 . . ? 
O173 Dy16 N64 26.6 . . ? 
C250 Dy16 N64 100.0 . . ? 
O106 Dy16 N64 80.2 . . ? 
O23 Dy16 N63 106.0 . . ? 
O38 Dy16 N63 72.7 . . ? 
O207 Dy16 N63 89.3 . . ? 
O62 Dy16 N63 95.3 . . ? 
O204 Dy16 N63 24.8 . . ? 
O50 Dy16 N63 157.9 . . ? 
O39 Dy16 N63 148.0 . . ? 
O173 Dy16 N63 76.4 . . ? 
C250 Dy16 N63 174.8 . . ? 
O106 Dy16 N63 25.5 . . ? 
N64 Dy16 N63 84.2 . . ? 
O198 Dy17 O102 99.2 . . ? 
O198 Dy17 O243 73.4 . . ? 
O102 Dy17 O243 75.5 . . ? 
O198 Dy17 O263 99.0 . . ? 
O102 Dy17 O263 139.3 . . ? 
O243 Dy17 O263 144.9 . . ? 
O198 Dy17 O246 73.1 . . ? 
O102 Dy17 O246 146.3 . . ? 
O243 Dy17 O246 70.8 . . ? 
O263 Dy17 O246 74.1 . . ? 
O198 Dy17 O185 149.3 . . ? 
O102 Dy17 O185 90.2 . . ? 
O243 Dy17 O185 80.9 . . ? 
O263 Dy17 O185 92.4 . . ? 
O246 Dy17 O185 82.9 . . ? 
O198 Dy17 O136 69.8 . . ? 
O102 Dy17 O136 74.0 . . ? 
O243 Dy17 O136 126.7 . . ? 
O263 Dy17 O136 78.7 . . ? 
O246 Dy17 O136 129.2 . . ? 
O185 Dy17 O136 140.8 . . ? 
O198 Dy17 O131 143.5 . . ? 
O102 Dy17 O131 71.4 . . ? 
O243 Dy17 O131 133.2 . . ? 
O263 Dy17 O131 72.4 . . ? 
O246 Dy17 O131 133.4 . . ? 
O185 Dy17 O131 67.2 . . ? 
O136 Dy17 O131 73.8 . . ? 
O198 Dy17 Dy15 38.4 . . ? 
O102 Dy17 Dy15 135.7 . . ? 
O243 Dy17 Dy15 78.5 . . ? 
O263 Dy17 Dy15 75.4 . . ? 
O246 Dy17 Dy15 37.4 . . ? 
O185 Dy17 Dy15 120.3 . . ? 
O136 Dy17 Dy15 94.5 . . ? 
O131 Dy17 Dy15 147.2 . . ? 
O198 Dy17 Dy6 39.5 . . ? 
O102 Dy17 Dy6 73.8 . . ? 
O243 Dy17 Dy6 38.1 . . ? 
O263 Dy17 Dy6 137.0 . . ? 
O246 Dy17 Dy6 80.8 . . ? 
O185 Dy17 Dy6 118.8 . . ? 
O136 Dy17 Dy6 91.4 . . ? 
O131 Dy17 Dy6 144.7 . . ? 
Dy15 Dy17 Dy6 63.6 . . ? 
O198 Dy17 Dy41 76.1 . . ? 
O102 Dy17 Dy41 109.9 . . ? 
O243 Dy17 Dy41 35.3 . . ? 
O263 Dy17 Dy41 109.7 . . ? 
O246 Dy17 Dy41 36.6 . . ? 
O185 Dy17 Dy41 73.2 . . ? 
O136 Dy17 Dy41 145.8 . . ? 
O131 Dy17 Dy41 140.4 . . ? 
Dy15 Dy17 Dy41 58.2 . . ? 
Dy6 Dy17 Dy41 59.2 . . ? 
O198 Dy17 Dy22 123.1 . . ? 
O102 Dy17 Dy22 105.4 . . ? 
O243 Dy17 Dy22 162.3 . . ? 
O263 Dy17 Dy22 35.5 . . ? 
O246 Dy17 Dy22 106.1 . . ? 
O185 Dy17 Dy22 81.4 . . ? 
O136 Dy17 Dy22 69.2 . . ? 
O131 Dy17 Dy22 37.2 . . ? 
Dy15 Dy17 Dy22 110.1 . . ? 
Dy6 Dy17 Dy22 159.6 . . ? 
Dy41 Dy17 Dy22 136.1 . . ? 
O87 Dy18 O171 148.1 . . ? 
O87 Dy18 O262 129.5 . . ? 
O171 Dy18 O262 72.8 . . ? 
O87 Dy18 O181 73.2 . . ? 
O171 Dy18 O181 138.3 . . ? 
O262 Dy18 O181 70.3 . . ? 
O87 Dy18 O255 77.8 . . ? 
O171 Dy18 O255 88.7 . . ? 
O262 Dy18 O255 75.8 . . ? 
O181 Dy18 O255 100.4 . . ? 
O87 Dy18 O190 125.4 . . ? 
O171 Dy18 O190 80.8 . . ? 
O262 Dy18 O190 70.4 . . ? 
O181 Dy18 O190 69.1 . . ? 
O255 Dy18 O190 146.2 . . ? 
O87 Dy18 O256 81.0 . . ? 
O171 Dy18 O256 67.2 . . ? 
O262 Dy18 O256 128.1 . . ? 
O181 Dy18 O256 154.1 . . ? 
O255 Dy18 O256 71.6 . . ? 
O190 Dy18 O256 130.7 . . ? 
O87 Dy18 O19 75.9 . . ? 
O171 Dy18 O19 98.4 . . ? 
O262 Dy18 O19 143.3 . . ? 
O181 Dy18 O19 99.5 . . ? 
O255 Dy18 O19 140.6 . . ? 
O190 Dy18 O19 73.0 . . ? 
O256 Dy18 O19 75.6 . . ? 
O87 Dy18 Dy49 150.9 . . ? 
O171 Dy18 Dy49 61.0 . . ? 
O262 Dy18 Dy49 37.0 . . ? 
O181 Dy18 Dy49 77.8 . . ? 
O255 Dy18 Dy49 110.1 . . ? 
O190 Dy18 Dy49 37.3 . . ? 
O256 Dy18 Dy49 128.1 . . ? 
O19 Dy18 Dy49 107.1 . . ? 
O87 Dy18 Dy47 96.2 . . ? 
O171 Dy18 Dy47 108.9 . . ? 
O262 Dy18 Dy47 36.1 . . ? 
O181 Dy18 Dy47 37.4 . . ? 
O255 Dy18 Dy47 76.9 . . ? 
O190 Dy18 Dy47 76.3 . . ? 
O256 Dy18 Dy47 148.4 . . ? 
O19 Dy18 Dy47 134.6 . . ? 
Dy49 Dy18 Dy47 60.4 . . ? 
O87 Dy18 Dy4 93.9 . . ? 
O171 Dy18 Dy4 115.8 . . ? 
O262 Dy18 Dy4 75.0 . . ? 
O181 Dy18 Dy4 35.1 . . ? 
O255 Dy18 Dy4 133.4 . . ? 
O190 Dy18 Dy4 36.1 . . ? 
O256 Dy18 Dy4 153.0 . . ? 
O19 Dy18 Dy4 77.5 . . ? 
Dy49 Dy18 Dy4 59.8 . . ? 
Dy47 Dy18 Dy4 58.3 . . ? 
O87 Dy18 Dy33 71.8 . . ? 
O171 Dy18 Dy33 80.5 . . ? 
O262 Dy18 Dy33 105.7 . . ? 
O181 Dy18 Dy33 127.9 . . ? 
O255 Dy18 Dy33 35.0 . . ? 
O190 Dy18 Dy33 161.2 . . ? 
O256 Dy18 Dy33 37.2 . . ? 
O19 Dy18 Dy33 107.9 . . ? 
Dy49 Dy18 Dy33 130.8 . . ? 
Dy47 Dy18 Dy33 111.8 . . ? 
Dy4 Dy18 Dy33 162.4 . . ? 
O127 Dy19 O58 81.4 . . ? 
O127 Dy19 O242 159.2 . . ? 
O58 Dy19 O242 92.7 . . ? 
O127 Dy19 O260 127.9 . . ? 
O58 Dy19 O260 75.6 . . ? 
O242 Dy19 O260 68.7 . . ? 
O127 Dy19 O177 126.7 . . ? 
O58 Dy19 O177 149.7 . . ? 
O242 Dy19 O177 64.9 . . ? 
O260 Dy19 O177 77.2 . . ? 
O127 Dy19 O118 79.3 . . ? 
O58 Dy19 O118 79.7 . . ? 
O242 Dy19 O118 80.1 . . ? 
O260 Dy19 O118 138.6 . . ? 
O177 Dy19 O118 113.7 . . ? 
O127 Dy19 O98 81.0 . . ? 
O58 Dy19 O98 132.8 . . ? 
O242 Dy19 O98 88.8 . . ? 
O260 Dy19 O98 146.0 . . ? 
O177 Dy19 O98 70.0 . . ? 
O118 Dy19 O98 54.1 . . ? 
O127 Dy19 O217 77.9 . . ? 
O58 Dy19 O217 136.5 . . ? 
O242 Dy19 O217 118.4 . . ? 
O260 Dy19 O217 87.8 . . ? 
O177 Dy19 O217 54.4 . . ? 
O118 Dy19 O217 132.0 . . ? 
O98 Dy19 O217 80.8 . . ? 
O127 Dy19 C243 78.2 . . ? 
O58 Dy19 C243 105.0 . . ? 
O242 Dy19 C243 84.2 . . ? 
O260 Dy19 C243 152.8 . . ? 
O177 Dy19 C243 93.3 . . ? 
O118 Dy19 C243 25.9 . . ? 
O98 Dy19 C243 28.2 . . ? 
O217 Dy19 C243 107.5 . . ? 
O127 Dy19 O182 78.1 . . ? 
O58 Dy19 O182 75.5 . . ? 
O242 Dy19 O182 119.8 . . ? 
O260 Dy19 O182 51.2 . . ? 
O177 Dy19 O182 97.4 . . ? 
O118 Dy19 O182 148.5 . . ? 
O98 Dy19 O182 141.3 . . ? 
O217 Dy19 O182 63.1 . . ? 
C243 Dy19 O182 156.0 . . ? 
O127 Dy19 N67 101.9 . . ? 
O58 Dy19 N67 155.0 . . ? 
O242 Dy19 N67 91.9 . . ? 
O260 Dy19 N67 83.3 . . ? 
O177 Dy19 N67 27.2 . . ? 
O118 Dy19 N67 125.4 . . ? 
O98 Dy19 N67 71.9 . . ? 
O217 Dy19 N67 27.3 . . ? 
C243 Dy19 N67 99.9 . . ? 
O182 Dy19 N67 80.9 . . ? 
O127 Dy19 Dy37 154.3 . . ? 
O58 Dy19 Dy37 75.7 . . ? 
O242 Dy19 Dy37 35.6 . . ? 
O260 Dy19 Dy37 34.4 . . ? 
O177 Dy19 Dy37 74.3 . . ? 
O118 Dy19 Dy37 107.3 . . ? 
O98 Dy19 Dy37 123.3 . . ? 
O217 Dy19 Dy37 111.5 . . ? 
C243 Dy19 Dy37 118.6 . . ? 
O182 Dy19 Dy37 85.1 . . ? 
N67 Dy19 Dy37 94.3 . . ? 
O133 Dy20 O240 75.6 . . ? 
O133 Dy20 O191 147.3 . . ? 
O240 Dy20 O191 72.0 . . ? 
O133 Dy20 O230 93.5 . . ? 
O240 Dy20 O230 70.9 . . ? 
O191 Dy20 O230 72.3 . . ? 
O133 Dy20 O261 134.9 . . ? 
O240 Dy20 O261 149.4 . . ? 
O191 Dy20 O261 77.5 . . ? 
O230 Dy20 O261 100.1 . . ? 
O133 Dy20 O241 72.4 . . ? 
O240 Dy20 O241 132.1 . . ? 
O191 Dy20 O241 134.8 . . ? 
O230 Dy20 O241 144.6 . . ? 
O261 Dy20 O241 71.8 . . ? 
O133 Dy20 O232 97.5 . . ? 
O240 Dy20 O232 83.2 . . ? 
O191 Dy20 O232 82.7 . . ? 
O230 Dy20 O232 148.3 . . ? 
O261 Dy20 O232 93.0 . . ? 
O241 Dy20 O232 67.0 . . ? 
O133 Dy20 O89 73.5 . . ? 
O240 Dy20 O89 125.1 . . ? 
O191 Dy20 O89 123.4 . . ? 
O230 Dy20 O89 67.0 . . ? 
O261 Dy20 O89 72.9 . . ? 
O241 Dy20 O89 77.8 . . ? 
O232 Dy20 O89 144.7 . . ? 
O133 Dy20 Dy38 130.9 . . ? 
O240 Dy20 Dy38 78.3 . . ? 
O191 Dy20 Dy38 37.1 . . ? 
O230 Dy20 Dy38 38.4 . . ? 
O261 Dy20 Dy38 77.5 . . ? 
O241 Dy20 Dy38 149.0 . . ? 
O232 Dy20 Dy38 119.7 . . ? 
O89 Dy20 Dy38 89.3 . . ? 
O133 Dy20 Dy5 71.4 . . ? 
O240 Dy20 Dy5 38.6 . . ? 
O191 Dy20 Dy5 80.7 . . ? 
O230 Dy20 Dy5 36.1 . . ? 
O261 Dy20 Dy5 135.8 . . ? 
O241 Dy20 Dy5 143.6 . . ? 
O232 Dy20 Dy5 121.8 . . ? 
O89 Dy20 Dy5 88.4 . . ? 
Dy38 Dy20 Dy5 62.3 . . ? 
O133 Dy20 Dy33 110.4 . . ? 
O240 Dy20 Dy33 35.4 . . ? 
O191 Dy20 Dy33 38.2 . . ? 
O230 Dy20 Dy33 75.4 . . ? 
O261 Dy20 Dy33 114.6 . . ? 
O241 Dy20 Dy33 139.8 . . ? 
O232 Dy20 Dy33 72.9 . . ? 
O89 Dy20 Dy33 142.4 . . ? 
Dy38 Dy20 Dy33 59.2 . . ? 
Dy5 Dy20 Dy33 60.0 . . ? 
O133 Dy20 Dy36 102.3 . . ? 
O240 Dy20 Dy36 164.9 . . ? 
O191 Dy20 Dy36 110.1 . . ? 
O230 Dy20 Dy36 124.3 . . ? 
O261 Dy20 Dy36 36.1 . . ? 
O241 Dy20 Dy36 36.2 . . ? 
O232 Dy20 Dy36 82.2 . . ? 
O89 Dy20 Dy36 67.2 . . ? 
Dy38 Dy20 Dy36 112.8 . . ? 
Dy5 Dy20 Dy36 155.4 . . ? 
Dy33 Dy20 Dy36 140.8 . . ? 
O264 Dy21 O205 126.4 . . ? 
O264 Dy21 O269 149.6 . . ? 
O205 Dy21 O269 72.2 . . ? 
O264 Dy21 O111 72.9 . . ? 
O205 Dy21 O111 150.0 . . ? 
O269 Dy21 O111 102.5 . . ? 
O264 Dy21 O267 75.8 . . ? 
O205 Dy21 O267 75.3 . . ? 
O269 Dy21 O267 134.6 . . ? 
O111 Dy21 O267 90.2 . . ? 
O264 Dy21 O258 82.1 . . ? 
O205 Dy21 O258 66.5 . . ? 
O269 Dy21 O258 85.9 . . ? 
O111 Dy21 O258 143.5 . . ? 
O267 Dy21 O258 109.1 . . ? 
O264 Dy21 O257 71.7 . . ? 
O205 Dy21 O257 132.1 . . ? 
O269 Dy21 O257 78.3 . . ? 
O111 Dy21 O257 72.5 . . ? 
O267 Dy21 O257 146.4 . . ? 
O258 Dy21 O257 74.7 . . ? 
O264 Dy21 O222 130.4 . . ? 
O205 Dy21 O222 79.7 . . ? 
O269 Dy21 O222 71.8 . . ? 
O111 Dy21 O222 70.8 . . ? 
O267 Dy21 O222 71.9 . . ? 
O258 Dy21 O222 143.9 . . ? 
O257 Dy21 O222 125.2 . . ? 
O264 Dy21 Dy43 80.4 . . ? 
O205 Dy21 Dy43 150.7 . . ? 
O269 Dy21 Dy43 78.5 . . ? 
O111 Dy21 Dy43 38.7 . . ? 
O267 Dy21 Dy43 128.4 . . ? 
O258 Dy21 Dy43 112.0 . . ? 
O257 Dy21 Dy43 37.5 . . ? 
O222 Dy21 Dy43 91.3 . . ? 
O264 Dy21 Dy42 38.8 . . ? 
O205 Dy21 Dy42 146.1 . . ? 
O269 Dy21 Dy42 137.9 . . ? 
O111 Dy21 Dy42 36.7 . . ? 
O267 Dy21 Dy42 71.3 . . ? 
O258 Dy21 Dy42 120.3 . . ? 
O257 Dy21 Dy42 78.2 . . ? 
O222 Dy21 Dy42 94.7 . . ? 
Dy43 Dy21 Dy42 61.7 . . ? 
O264 Dy21 Dy40 36.2 . . ? 
O205 Dy21 Dy40 133.0 . . ? 
O269 Dy21 Dy40 113.5 . . ? 
O111 Dy21 Dy40 76.7 . . ? 
O267 Dy21 Dy40 111.8 . . ? 
O258 Dy21 Dy40 67.5 . . ? 
O257 Dy21 Dy40 37.1 . . ? 
O222 Dy21 Dy40 147.3 . . ? 
Dy43 Dy21 Dy40 60.3 . . ? 
Dy42 Dy21 Dy40 59.0 . . ? 
O264 Dy21 Dy12 158.3 . . ? 
O205 Dy21 Dy12 36.5 . . ? 
O269 Dy21 Dy12 36.3 . . ? 
O111 Dy21 Dy12 128.7 . . ? 
O267 Dy21 Dy12 103.6 . . ? 
O258 Dy21 Dy12 77.7 . . ? 
O257 Dy21 Dy12 109.7 . . ? 
O222 Dy21 Dy12 67.5 . . ? 
Dy43 Dy21 Dy12 114.4 . . ? 
Dy42 Dy21 Dy12 162.0 . . ? 
Dy40 Dy21 Dy12 136.5 . . ? 
O220 Dy22 O169 106.4 . . ? 
O220 Dy22 O259 80.2 . . ? 
O169 Dy22 O259 74.8 . . ? 
O220 Dy22 O250 142.1 . . ? 
O169 Dy22 O250 92.4 . . ? 
O259 Dy22 O250 73.3 . . ? 
O220 Dy22 O147 143.3 . . ? 
O169 Dy22 O147 74.9 . . ? 
O259 Dy22 O147 132.9 . . ? 
O250 Dy22 O147 72.8 . . ? 
O220 Dy22 O263 81.8 . . ? 
O169 Dy22 O263 136.7 . . ? 
O259 Dy22 O263 147.4 . . ? 
O250 Dy22 O263 106.7 . . ? 
O147 Dy22 O263 74.5 . . ? 
O220 Dy22 O265 71.7 . . ? 
O169 Dy22 O265 144.2 . . ? 
O259 Dy22 O265 69.6 . . ? 
O250 Dy22 O265 73.8 . . ? 
O147 Dy22 O265 128.5 . . ? 
O263 Dy22 O265 79.0 . . ? 
O220 Dy22 O131 66.7 . . ? 
O169 Dy22 O131 73.0 . . ? 
O259 Dy22 O131 123.9 . . ? 
O250 Dy22 O131 151.1 . . ? 
O147 Dy22 O131 79.3 . . ? 
O263 Dy22 O131 71.9 . . ? 
O265 Dy22 O131 131.7 . . ? 
O220 Dy22 Dy7 109.6 . . ? 
O169 Dy22 Dy7 130.9 . . ? 
O259 Dy22 Dy7 79.6 . . ? 
O250 Dy22 Dy7 39.7 . . ? 
O147 Dy22 Dy7 94.1 . . ? 
O263 Dy22 Dy7 81.1 . . ? 
O265 Dy22 Dy7 38.0 . . ? 
O131 Dy22 Dy7 153.0 . . ? 
O220 Dy22 Dy11 118.7 . . ? 
O169 Dy22 Dy11 71.3 . . ? 
O259 Dy22 Dy11 39.0 . . ? 
O250 Dy22 Dy11 37.3 . . ? 
O147 Dy22 Dy11 96.8 . . ? 
O263 Dy22 Dy11 142.1 . . ? 
O265 Dy22 Dy11 78.5 . . ? 
O131 Dy22 Dy11 143.9 . . ? 
Dy7 Dy22 Dy11 62.5 . . ? 
O220 Dy22 Dy3 35.5 . . ? 
O169 Dy22 Dy3 78.3 . . ? 
O259 Dy22 Dy3 93.2 . . ? 
O250 Dy22 Dy3 165.4 . . ? 
O147 Dy22 Dy3 114.7 . . ? 
O263 Dy22 Dy3 87.6 . . ? 
O265 Dy22 Dy3 107.2 . . ? 
O131 Dy22 Dy3 35.9 . . ? 
Dy7 Dy22 Dy3 144.9 . . ? 
Dy11 Dy22 Dy3 128.2 . . ? 
O220 Dy22 Dy12 65.3 . . ? 
O169 Dy22 Dy12 110.5 . . ? 
O259 Dy22 Dy12 36.1 . . ? 
O250 Dy22 Dy12 77.4 . . ? 
O147 Dy22 Dy12 150.0 . . ? 
O263 Dy22 Dy12 111.4 . . ? 
O265 Dy22 Dy12 34.9 . . ? 
O131 Dy22 Dy12 130.7 . . ? 
Dy7 Dy22 Dy12 59.4 . . ? 
Dy11 Dy22 Dy12 59.8 . . ? 
Dy3 Dy22 Dy12 95.1 . . ? 
O36 Dy23 O17 82.1 . . ? 
O36 Dy23 O179 128.5 . . ? 
O17 Dy23 O179 115.8 . . ? 
O36 Dy23 O31 82.6 . . ? 
O17 Dy23 O31 73.0 . . ? 
O179 Dy23 O31 147.5 . . ? 
O36 Dy23 O195 122.8 . . ? 
O17 Dy23 O195 134.7 . . ? 
O179 Dy23 O195 79.9 . . ? 
O31 Dy23 O195 73.8 . . ? 
O36 Dy23 O178 159.1 . . ? 
O17 Dy23 O178 77.7 . . ? 
O179 Dy23 O178 66.6 . . ? 
O31 Dy23 O178 86.5 . . ? 
O195 Dy23 O178 70.4 . . ? 
O36 Dy23 O29 88.3 . . ? 
O17 Dy23 O29 54.5 . . ? 
O179 Dy23 O29 69.9 . . ? 
O31 Dy23 O29 127.4 . . ? 
O195 Dy23 O29 146.5 . . ? 
O178 Dy23 O29 84.2 . . ? 
O36 Dy23 O167 81.8 . . ? 
O17 Dy23 O167 142.5 . . ? 
O179 Dy23 O167 54.0 . . ? 
O31 Dy23 O167 137.4 . . ? 
O195 Dy23 O167 82.0 . . ? 
O178 Dy23 O167 117.7 . . ? 
O29 Dy23 O167 91.4 . . ? 
O36 Dy23 C311 84.7 . . ? 
O17 Dy23 C311 25.5 . . ? 
O179 Dy23 C311 94.3 . . ? 
O31 Dy23 C311 98.5 . . ? 
O195 Dy23 C311 149.0 . . ? 
O178 Dy23 C311 79.3 . . ? 
O29 Dy23 C311 29.0 . . ? 
O167 Dy23 C311 119.1 . . ? 
O36 Dy23 N74 104.6 . . ? 
O17 Dy23 N74 132.1 . . ? 
O179 Dy23 N74 27.1 . . ? 
O31 Dy23 N74 154.2 . . ? 
O195 Dy23 N74 81.7 . . ? 
O178 Dy23 N74 92.8 . . ? 
O29 Dy23 N74 78.0 . . ? 
O167 Dy23 N74 27.0 . . ? 
C311 Dy23 N74 106.8 . . ? 
O36 Dy23 Dy49 149.6 . . ? 
O17 Dy23 Dy49 88.9 . . ? 
O179 Dy23 Dy49 34.1 . . ? 
O31 Dy23 Dy49 122.4 . . ? 
O195 Dy23 Dy49 83.6 . . ? 
O178 Dy23 Dy49 35.9 . . ? 
O29 Dy23 Dy49 63.2 . . ? 
O167 Dy23 Dy49 88.1 . . ? 
C311 Dy23 Dy49 75.3 . . ? 
N74 Dy23 Dy49 61.2 . . ? 
O36 Dy23 Dy32 150.0 . . ? 
O17 Dy23 Dy32 104.0 . . ? 
O179 Dy23 Dy32 75.9 . . ? 
O31 Dy23 Dy32 71.5 . . ? 
O195 Dy23 Dy32 35.4 . . ? 
O178 Dy23 Dy32 36.0 . . ? 
O29 Dy23 Dy32 119.5 . . ? 
O167 Dy23 Dy32 106.9 . . ? 
C311 Dy23 Dy32 113.5 . . ? 
N74 Dy23 Dy32 93.1 . . ? 
Dy49 Dy23 Dy32 60.4 . . ? 
O154 Dy24 O93 81.8 . . ? 
O154 Dy24 O241 79.8 . . ? 
O93 Dy24 O241 159.9 . . ? 
O154 Dy24 O232 131.4 . . ? 
O93 Dy24 O232 119.2 . . ? 
O241 Dy24 O232 69.0 . . ? 
O154 Dy24 O125 75.4 . . ? 
O93 Dy24 O125 73.1 . . ? 
O241 Dy24 O125 94.4 . . ? 
O232 Dy24 O125 71.2 . . ? 
O154 Dy24 O166 71.9 . . ? 
O93 Dy24 O166 78.7 . . ? 
O241 Dy24 O166 103.0 . . ? 
O232 Dy24 O166 149.7 . . ? 
O125 Dy24 O166 139.1 . . ? 
O154 Dy24 O219 118.9 . . ? 
O93 Dy24 O219 130.3 . . ? 
O241 Dy24 O219 66.8 . . ? 
O232 Dy24 O219 82.1 . . ? 
O125 Dy24 O219 151.8 . . ? 
O166 Dy24 O219 68.2 . . ? 
O154 Dy24 O231 149.4 . . ? 
O93 Dy24 O231 84.4 . . ? 
O241 Dy24 O231 115.6 . . ? 
O232 Dy24 O231 79.1 . . ? 
O125 Dy24 O231 126.0 . . ? 
O166 Dy24 O231 78.6 . . ? 
O219 Dy24 O231 54.2 . . ? 
O154 Dy24 N66 137.1 . . ? 
O93 Dy24 N66 107.6 . . ? 
O241 Dy24 N66 91.4 . . ? 
O232 Dy24 N66 81.4 . . ? 
O125 Dy24 N66 147.5 . . ? 
O166 Dy24 N66 69.4 . . ? 
O219 Dy24 N66 26.4 . . ? 
O231 Dy24 N66 27.9 . . ? 
O154 Dy24 Dy36 92.8 . . ? 
O93 Dy24 Dy36 153.9 . . ? 
O241 Dy24 Dy36 36.1 . . ? 
O232 Dy24 Dy36 83.3 . . ? 
O125 Dy24 Dy36 130.4 . . ? 
O166 Dy24 Dy36 75.4 . . ? 
O219 Dy24 Dy36 33.7 . . ? 
O231 Dy24 Dy36 87.6 . . ? 
N66 Dy24 Dy36 60.1 . . ? 
O154 Dy24 Dy20 102.9 . . ? 
O93 Dy24 Dy20 146.0 . . ? 
O241 Dy24 Dy20 34.8 . . ? 
O232 Dy24 Dy20 35.2 . . ? 
O125 Dy24 Dy20 75.6 . . ? 
O166 Dy24 Dy20 135.1 . . ? 
O219 Dy24 Dy20 77.3 . . ? 
O231 Dy24 Dy20 103.8 . . ? 
N66 Dy24 Dy20 91.9 . . ? 
Dy36 Dy24 Dy20 60.1 . . ? 
O139 Dy25 O88 75.9 . . ? 
O139 Dy25 O163 77.7 . . ? 
O88 Dy25 O163 88.9 . . ? 
O139 Dy25 O150 142.6 . . ? 
O88 Dy25 O150 105.8 . . ? 
O163 Dy25 O150 138.9 . . ? 
O139 Dy25 O72 137.2 . . ? 
O88 Dy25 O72 74.9 . . ? 
O163 Dy25 O72 71.1 . . ? 
O150 Dy25 O72 76.1 . . ? 
O139 Dy25 O137 124.2 . . ? 
O88 Dy25 O137 144.1 . . ? 
O163 Dy25 O137 69.9 . . ? 
O150 Dy25 O137 76.6 . . ? 
O72 Dy25 O137 71.0 . . ? 
O139 Dy25 O156 73.6 . . ? 
O88 Dy25 O156 143.4 . . ? 
O163 Dy25 O156 103.8 . . ? 
O150 Dy25 O156 87.0 . . ? 
O72 Dy25 O156 141.7 . . ? 
O137 Dy25 O156 71.7 . . ? 
O139 Dy25 N68 75.3 . . ? 
O88 Dy25 N68 72.1 . . ? 
O163 Dy25 N68 150.1 . . ? 
O150 Dy25 N68 70.1 . . ? 
O72 Dy25 N68 123.0 . . ? 
O137 Dy25 N68 137.5 . . ? 
O156 Dy25 N68 80.8 . . ? 
O139 Dy25 Dy45 154.2 . . ? 
O88 Dy25 Dy45 112.0 . . ? 
O163 Dy25 Dy45 78.0 . . ? 
O150 Dy25 Dy45 61.0 . . ? 
O72 Dy25 Dy45 37.5 . . ? 
O137 Dy25 Dy45 37.0 . . ? 
O156 Dy25 Dy45 104.3 . . ? 
N68 Dy25 Dy45 130.2 . . ? 
O139 Dy25 Dy31 102.9 . . ? 
O88 Dy25 Dy31 70.2 . . ? 
O163 Dy25 Dy31 36.4 . . ? 
O150 Dy25 Dy31 112.9 . . ? 
O72 Dy25 Dy31 37.2 . . ? 
O137 Dy25 Dy31 75.9 . . ? 
O156 Dy25 Dy31 136.5 . . ? 
N68 Dy25 Dy31 141.5 . . ? 
Dy45 Dy25 Dy31 60.4 . . ? 
O139 Dy25 Dy34 94.9 . . ? 
O88 Dy25 Dy34 124.7 . . ? 
O163 Dy25 Dy34 36.7 . . ? 
O150 Dy25 Dy34 112.3 . . ? 
O72 Dy25 Dy34 77.2 . . ? 
O137 Dy25 Dy34 36.0 . . ? 
O156 Dy25 Dy34 78.1 . . ? 
N68 Dy25 Dy34 158.5 . . ? 
Dy45 Dy25 Dy34 60.1 . . ? 
Dy31 Dy25 Dy34 58.8 . . ? 
O149 Dy26 O183 139.0 . . ? 
O149 Dy26 O192 71.3 . . ? 
O183 Dy26 O192 73.8 . . ? 
O149 Dy26 O231 78.9 . . ? 
O183 Dy26 O231 141.2 . . ? 
O192 Dy26 O231 142.3 . . ? 
O149 Dy26 O114 143.0 . . ? 
O183 Dy26 O114 72.8 . . ? 
O192 Dy26 O114 115.6 . . ? 
O231 Dy26 O114 76.3 . . ? 
O149 Dy26 O206 78.1 . . ? 
O183 Dy26 O206 74.6 . . ? 
O192 Dy26 O206 78.8 . . ? 
O231 Dy26 O206 117.4 . . ? 
O114 Dy26 O206 138.1 . . ? 
O149 Dy26 O221 72.1 . . ? 
O183 Dy26 O221 113.1 . . ? 
O192 Dy26 O221 67.6 . . ? 
O231 Dy26 O221 81.8 . . ? 
O114 Dy26 O221 77.6 . . ? 
O206 Dy26 O221 140.5 . . ? 
O149 Dy26 O211 110.3 . . ? 
O183 Dy26 O211 86.3 . . ? 
O192 Dy26 O211 143.9 . . ? 
O231 Dy26 O211 68.3 . . ? 
O114 Dy26 O211 85.4 . . ? 
O206 Dy26 O211 66.8 . . ? 
O221 Dy26 O211 148.4 . . ? 
O149 Dy26 Dy37 37.6 . . ? 
O183 Dy26 Dy37 145.5 . . ? 
O192 Dy26 Dy37 76.1 . . ? 
O231 Dy26 Dy37 66.2 . . ? 
O114 Dy26 Dy37 106.3 . . ? 
O206 Dy26 Dy37 115.5 . . ? 
O221 Dy26 Dy37 37.7 . . ? 
O211 Dy26 Dy37 128.2 . . ? 
O149 Dy26 Dy32 37.8 . . ? 
O183 Dy26 Dy32 101.7 . . ? 
O192 Dy26 Dy32 37.6 . . ? 
O231 Dy26 Dy32 116.7 . . ? 
O114 Dy26 Dy32 150.2 . . ? 
O206 Dy26 Dy32 62.5 . . ? 
O221 Dy26 Dy32 78.1 . . ? 
O211 Dy26 Dy32 124.0 . . ? 
Dy37 Dy26 Dy32 61.5 . . ? 
O149 Dy26 Dy44 76.0 . . ? 
O183 Dy26 Dy44 87.2 . . ? 
O192 Dy26 Dy44 34.4 . . ? 
O231 Dy26 Dy44 116.4 . . ? 
O114 Dy26 Dy44 91.0 . . ? 
O206 Dy26 Dy44 113.0 . . ? 
O221 Dy26 Dy44 34.9 . . ? 
O211 Dy26 Dy44 173.2 . . ? 
Dy37 Dy26 Dy44 58.3 . . ? 
Dy32 Dy26 Dy44 59.3 . . ? 
O227 Dy27 O251 73.0 . . ? 
O227 Dy27 O64 146.6 . . ? 
O251 Dy27 O64 133.5 . . ? 
O227 Dy27 O226 139.6 . . ? 
O251 Dy27 O226 70.4 . . ? 
O64 Dy27 O226 73.7 . . ? 
O227 Dy27 O224 90.6 . . ? 
O251 Dy27 O224 74.2 . . ? 
O64 Dy27 O224 80.8 . . ? 
O226 Dy27 O224 95.3 . . ? 
O227 Dy27 O67 85.0 . . ? 
O251 Dy27 O67 138.3 . . ? 
O64 Dy27 O67 82.6 . . ? 
O226 Dy27 O67 112.0 . . ? 
O224 Dy27 O67 142.4 . . ? 
O227 Dy27 O208 69.3 . . ? 
O251 Dy27 O208 126.5 . . ? 
O64 Dy27 O208 77.4 . . ? 
O226 Dy27 O208 149.3 . . ? 
O224 Dy27 O208 69.8 . . ? 
O67 Dy27 O208 73.7 . . ? 
O227 Dy27 O249 81.4 . . ? 
O251 Dy27 O249 70.4 . . ? 
O64 Dy27 O249 123.0 . . ? 
O226 Dy27 O249 70.8 . . ? 
O224 Dy27 O249 144.5 . . ? 
O67 Dy27 O249 71.6 . . ? 
O208 Dy27 O249 136.1 . . ? 
O227 Dy27 Dy36 61.5 . . ? 
O251 Dy27 Dy36 35.9 . . ? 
O64 Dy27 Dy36 151.7 . . ? 
O226 Dy27 Dy36 78.7 . . ? 
O224 Dy27 Dy36 108.1 . . ? 
O67 Dy27 Dy36 102.4 . . ? 
O208 Dy27 Dy36 130.9 . . ? 
O249 Dy27 Dy36 38.4 . . ? 
O227 Dy27 Dy46 108.9 . . ? 
O251 Dy27 Dy46 35.9 . . ? 
O64 Dy27 Dy46 100.0 . . ? 
O226 Dy27 Dy46 36.6 . . ? 
O224 Dy27 Dy46 74.7 . . ? 
O67 Dy27 Dy46 141.7 . . ? 
O208 Dy27 Dy46 144.4 . . ? 
O249 Dy27 Dy46 75.3 . . ? 
Dy36 Dy27 Dy46 58.9 . . ? 
O227 Dy27 Dy30 118.0 . . ? 
O251 Dy27 Dy30 77.6 . . ? 
O64 Dy27 Dy30 91.0 . . ? 
O226 Dy27 Dy30 37.0 . . ? 
O224 Dy27 Dy30 131.1 . . ? 
O67 Dy27 Dy30 82.6 . . ? 
O208 Dy27 Dy30 154.7 . . ? 
O249 Dy27 Dy30 37.1 . . ? 
Dy36 Dy27 Dy30 62.6 . . ? 
Dy46 Dy27 Dy30 59.3 . . ? 
O227 Dy27 Dy14 35.8 . . ? 
O251 Dy27 Dy14 105.2 . . ? 
O64 Dy27 Dy14 110.8 . . ? 
O226 Dy27 Dy14 175.4 . . ? 
O224 Dy27 Dy14 84.6 . . ? 
O67 Dy27 Dy14 70.3 . . ? 
O208 Dy27 Dy14 34.7 . . ? 
O249 Dy27 Dy14 106.7 . . ? 
Dy36 Dy27 Dy14 96.9 . . ? 
Dy46 Dy27 Dy14 139.4 . . ? 
Dy30 Dy27 Dy14 141.8 . . ? 
O104 Dy28 O235 98.0 . . ? 
O104 Dy28 O140 81.5 . . ? 
O235 Dy28 O140 83.8 . . ? 
O104 Dy28 O258 144.2 . . ? 
O235 Dy28 O258 81.3 . . ? 
O140 Dy28 O258 133.4 . . ? 
O104 Dy28 O113 81.0 . . ? 
O235 Dy28 O113 153.7 . . ? 
O140 Dy28 O113 121.7 . . ? 
O258 Dy28 O113 84.5 . . ? 
O104 Dy28 O205 77.4 . . ? 
O235 Dy28 O205 85.4 . . ? 
O140 Dy28 O205 154.7 . . ? 
O258 Dy28 O205 66.8 . . ? 
O113 Dy28 O205 68.6 . . ? 
O104 Dy28 O128 108.0 . . ? 
O235 Dy28 O128 147.0 . . ? 
O140 Dy28 O128 80.4 . . ? 
O258 Dy28 O128 88.9 . . ? 
O113 Dy28 O128 53.8 . . ? 
O205 Dy28 O128 119.4 . . ? 
O104 Dy28 O214 162.6 . . ? 
O235 Dy28 O214 84.1 . . ? 
O140 Dy28 O214 81.6 . . ? 
O258 Dy28 O214 53.2 . . ? 
O113 Dy28 O214 104.7 . . ? 
O205 Dy28 O214 120.0 . . ? 
O128 Dy28 O214 65.1 . . ? 
O104 Dy28 N62 170.4 . . ? 
O235 Dy28 N62 78.4 . . ? 
O140 Dy28 N62 106.8 . . ? 
O258 Dy28 N62 26.9 . . ? 
O113 Dy28 N62 98.2 . . ? 
O205 Dy28 N62 93.3 . . ? 
O128 Dy28 N62 78.7 . . ? 
O214 Dy28 N62 26.7 . . ? 
O104 Dy28 N71 96.1 . . ? 
O235 Dy28 N71 165.3 . . ? 
O140 Dy28 N71 102.4 . . ? 
O258 Dy28 N71 84.9 . . ? 
O113 Dy28 N71 27.0 . . ? 
O205 Dy28 N71 93.7 . . ? 
O128 Dy28 N71 26.9 . . ? 
O214 Dy28 N71 83.7 . . ? 
N62 Dy28 N71 87.0 . . ? 
O104 Dy28 Dy12 72.1 . . ? 
O235 Dy28 Dy12 121.9 . . ? 
O140 Dy28 Dy12 144.9 . . ? 
O258 Dy28 Dy12 78.0 . . ? 
O113 Dy28 Dy12 32.7 . . ? 
O205 Dy28 Dy12 36.5 . . ? 
O128 Dy28 Dy12 86.1 . . ? 
O214 Dy28 Dy12 121.4 . . ? 
N62 Dy28 Dy12 102.1 . . ? 
N71 Dy28 Dy12 59.3 . . ? 
O104 Dy28 Dy21 110.2 . . ? 
O235 Dy28 Dy21 72.8 . . ? 
O140 Dy28 Dy21 154.9 . . ? 
O258 Dy28 Dy21 35.1 . . ? 
O113 Dy28 Dy21 82.8 . . ? 
O205 Dy28 Dy21 33.9 . . ? 
O128 Dy28 Dy21 114.7 . . ? 
O214 Dy28 Dy21 87.0 . . ? 
N62 Dy28 Dy21 60.3 . . ? 
N71 Dy28 Dy21 98.4 . . ? 
Dy12 Dy28 Dy21 59.4 . . ? 
O124 Dy29 O188 83.0 . . ? 
O124 Dy29 O247 82.2 . . ? 
O188 Dy29 O247 135.2 . . ? 
O124 Dy29 O233 88.6 . . ? 
O188 Dy29 O233 150.5 . . ? 
O247 Dy29 O233 70.8 . . ? 
O124 Dy29 O138 96.0 . . ? 
O188 Dy29 O138 75.1 . . ? 
O247 Dy29 O138 148.5 . . ? 
O233 Dy29 O138 77.7 . . ? 
O124 Dy29 O186 157.2 . . ? 
O188 Dy29 O186 117.2 . . ? 
O247 Dy29 O186 89.2 . . ? 
O233 Dy29 O186 68.6 . . ? 
O138 Dy29 O186 80.4 . . ? 
O124 Dy29 O229 145.5 . . ? 
O188 Dy29 O229 82.9 . . ? 
O247 Dy29 O229 86.0 . . ? 
O233 Dy29 O229 117.7 . . ? 
O138 Dy29 O229 110.4 . . ? 
O186 Dy29 O229 53.6 . . ? 
O124 Dy29 O223 83.6 . . ? 
O188 Dy29 O223 84.3 . . ? 
O247 Dy29 O223 52.1 . . ? 
O233 Dy29 O223 122.9 . . ? 
O138 Dy29 O223 159.3 . . ? 
O186 Dy29 O223 107.6 . . ? 
O229 Dy29 O223 63.8 . . ? 
O124 Dy29 N72 167.0 . . ? 
O188 Dy29 N72 101.9 . . ? 
O247 Dy29 N72 86.1 . . ? 
O233 Dy29 N72 92.6 . . ? 
O138 Dy29 N72 96.8 . . ? 
O186 Dy29 N72 26.7 . . ? 
O229 Dy29 N72 27.0 . . ? 
O223 Dy29 N72 84.9 . . ? 
O124 Dy29 N78 78.8 . . ? 
O188 Dy29 N78 109.3 . . ? 
O247 Dy29 N78 26.1 . . ? 
O233 Dy29 N78 96.7 . . ? 
O138 Dy29 N78 172.6 . . ? 
O186 Dy29 N78 102.2 . . ? 
O229 Dy29 N78 76.5 . . ? 
O223 Dy29 N78 26.4 . . ? 
N72 Dy29 N78 88.2 . . ? 
O124 Dy29 Dy41 75.5 . . ? 
O188 Dy29 Dy41 157.5 . . ? 
O247 Dy29 Dy41 35.5 . . ? 
O233 Dy29 Dy41 37.2 . . ? 
O138 Dy29 Dy41 113.5 . . ? 
O186 Dy29 Dy41 85.2 . . ? 
O229 Dy29 Dy41 111.2 . . ? 
O223 Dy29 Dy41 86.6 . . ? 
N72 Dy29 Dy41 97.8 . . ? 
N78 Dy29 Dy41 60.2 . . ? 
O124 Dy29 Dy45 123.4 . . ? 
O188 Dy29 Dy45 140.6 . . ? 
O247 Dy29 Dy45 81.2 . . ? 
O233 Dy29 Dy45 34.9 . . ? 
O138 Dy29 Dy45 73.6 . . ? 
O186 Dy29 Dy45 34.0 . . ? 
O229 Dy29 Dy45 86.2 . . ? 
O223 Dy29 Dy45 123.8 . . ? 
N72 Dy29 Dy45 59.5 . . ? 
N78 Dy29 Dy45 104.6 . . ? 
Dy41 Dy29 Dy45 60.3 . . ? 
O160 Dy30 O129 75.7 . . ? 
O160 Dy30 O145 87.8 . . ? 
O129 Dy30 O145 77.7 . . ? 
O160 Dy30 O85 72.0 . . ? 
O129 Dy30 O85 77.2 . . ? 
O145 Dy30 O85 150.9 . . ? 
O160 Dy30 O249 143.9 . . ? 
O129 Dy30 O249 120.6 . . ? 
O145 Dy30 O249 67.3 . . ? 
O85 Dy30 O249 139.8 . . ? 
O160 Dy30 O226 76.7 . . ? 
O129 Dy30 O226 138.2 . . ? 
O145 Dy30 O226 70.4 . . ? 
O85 Dy30 O226 122.2 . . ? 
O249 Dy30 O226 70.6 . . ? 
O160 Dy30 O25 107.3 . . ? 
O129 Dy30 O25 143.2 . . ? 
O145 Dy30 O25 138.2 . . ? 
O85 Dy30 O25 69.5 . . ? 
O249 Dy30 O25 79.3 . . ? 
O226 Dy30 O25 75.4 . . ? 
O160 Dy30 N79 142.3 . . ? 
O129 Dy30 N79 77.9 . . ? 
O145 Dy30 N79 112.3 . . ? 
O85 Dy30 N79 76.3 . . ? 
O249 Dy30 N79 73.5 . . ? 
O226 Dy30 N79 139.2 . . ? 
O25 Dy30 N79 79.4 . . ? 
O160 Dy30 Dy46 68.5 . . ? 
O129 Dy30 Dy46 102.5 . . ? 
O145 Dy30 Dy46 36.6 . . ? 
O85 Dy30 Dy46 139.0 . . ? 
O249 Dy30 Dy46 76.2 . . ? 
O226 Dy30 Dy46 37.5 . . ? 
O25 Dy30 Dy46 112.8 . . ? 
N79 Dy30 Dy46 144.4 . . ? 
O160 Dy30 Dy27 113.1 . . ? 
O129 Dy30 Dy27 151.5 . . ? 
O145 Dy30 Dy27 75.7 . . ? 
O85 Dy30 Dy27 131.1 . . ? 
O249 Dy30 Dy27 37.5 . . ? 
O226 Dy30 Dy27 36.5 . . ? 
O25 Dy30 Dy27 62.6 . . ? 
N79 Dy30 Dy27 103.0 . . ? 
Dy46 Dy30 Dy27 60.1 . . ? 
O160 Dy30 Dy36 121.4 . . ? 
O129 Dy30 Dy36 94.4 . . ? 
O145 Dy30 Dy36 34.6 . . ? 
O85 Dy30 Dy36 162.4 . . ? 
O249 Dy30 Dy36 34.4 . . ? 
O226 Dy30 Dy36 74.3 . . ? 
O25 Dy30 Dy36 112.9 . . ? 
N79 Dy30 Dy36 86.9 . . ? 
Dy46 Dy30 Dy36 57.5 . . ? 
Dy27 Dy30 Dy36 57.5 . . ? 
O117 Dy31 O163 89.7 . . ? 
O117 Dy31 O207 112.8 . . ? 
O163 Dy31 O207 140.4 . . ? 
O117 Dy31 O72 75.7 . . ? 
O163 Dy31 O72 71.7 . . ? 
O207 Dy31 O72 82.5 . . ? 
O117 Dy31 O62 76.3 . . ? 
O163 Dy31 O62 153.3 . . ? 
O207 Dy31 O62 66.2 . . ? 
O72 Dy31 O62 124.7 . . ? 
O117 Dy31 O266 145.3 . . ? 
O163 Dy31 O266 71.2 . . ? 
O207 Dy31 O266 72.3 . . ? 
O72 Dy31 O266 70.9 . . ? 
O62 Dy31 O266 131.5 . . ? 
O117 Dy31 O144 137.3 . . ? 
O163 Dy31 O144 105.6 . . ? 
O207 Dy31 O144 80.2 . . ? 
O72 Dy31 O144 146.8 . . ? 
O62 Dy31 O144 72.6 . . ? 
O266 Dy31 O144 76.9 . . ? 
O117 Dy31 O71 75.0 . . ? 
O163 Dy31 O71 70.6 . . ? 
O207 Dy31 O71 144.7 . . ? 
O72 Dy31 O71 131.7 . . ? 
O62 Dy31 O71 83.8 . . ? 
O266 Dy31 O71 121.9 . . ? 
O144 Dy31 O71 73.2 . . ? 
O117 Dy31 Dy34 127.8 . . ? 
O163 Dy31 Dy34 38.6 . . ? 
O207 Dy31 Dy34 108.6 . . ? 
O72 Dy31 Dy34 79.5 . . ? 
O62 Dy31 Dy34 152.0 . . ? 
O266 Dy31 Dy34 36.5 . . ? 
O144 Dy31 Dy34 79.5 . . ? 
O71 Dy31 Dy34 89.1 . . ? 
O117 Dy31 Dy25 71.2 . . ? 
O163 Dy31 Dy25 36.3 . . ? 
O207 Dy31 Dy25 119.3 . . ? 
O72 Dy31 Dy25 37.9 . . ? 
O62 Dy31 Dy25 146.3 . . ? 
O266 Dy31 Dy25 76.7 . . ? 
O144 Dy31 Dy25 139.6 . . ? 
O71 Dy31 Dy25 95.9 . . ? 
Dy34 Dy31 Dy25 61.3 . . ? 
O117 Dy31 Dy45 112.0 . . ? 
O163 Dy31 Dy45 77.2 . . ? 
O207 Dy31 Dy45 64.5 . . ? 
O72 Dy31 Dy45 36.6 . . ? 
O62 Dy31 Dy45 129.0 . . ? 
O266 Dy31 Dy45 36.8 . . ? 
O144 Dy31 Dy45 110.2 . . ? 
O71 Dy31 Dy45 147.0 . . ? 
Dy34 Dy31 Dy45 60.6 . . ? 
Dy25 Dy31 Dy45 59.5 . . ? 
O117 Dy31 Dy8 105.5 . . ? 
O163 Dy31 Dy8 132.7 . . ? 
O207 Dy31 Dy8 74.1 . . ? 
O72 Dy31 Dy8 155.1 . . ? 
O62 Dy31 Dy8 36.7 . . ? 
O266 Dy31 Dy8 108.7 . . ? 
O144 Dy31 Dy8 36.5 . . ? 
O71 Dy31 Dy8 70.8 . . ? 
Dy34 Dy31 Dy8 115.6 . . ? 
Dy25 Dy31 Dy8 166.6 . . ? 
Dy45 Dy31 Dy8 131.9 . . ? 
O196 Dy32 O192 70.9 . . ? 
O196 Dy32 O80 79.2 . . ? 
O192 Dy32 O80 93.0 . . ? 
O196 Dy32 O149 70.5 . . ? 
O192 Dy32 O149 70.0 . . ? 
O80 Dy32 O149 148.7 . . ? 
O196 Dy32 O195 82.0 . . ? 
O192 Dy32 O195 145.9 . . ? 
O80 Dy32 O195 102.1 . . ? 
O149 Dy32 O195 81.9 . . ? 
O196 Dy32 O215 147.8 . . ? 
O192 Dy32 O215 100.8 . . ? 
O80 Dy32 O215 132.9 . . ? 
O149 Dy32 O215 77.4 . . ? 
O195 Dy32 O215 91.1 . . ? 
O196 Dy32 O239 126.5 . . ? 
O192 Dy32 O239 67.6 . . ? 
O80 Dy32 O239 70.8 . . ? 
O149 Dy32 O239 121.8 . . ? 
O195 Dy32 O239 146.3 . . ? 
O215 Dy32 O239 73.4 . . ? 
O196 Dy32 O178 133.2 . . ? 
O192 Dy32 O178 144.8 . . ? 
O80 Dy32 O178 72.0 . . ? 
O149 Dy32 O178 136.1 . . ? 
O195 Dy32 O178 69.3 . . ? 
O215 Dy32 O178 71.1 . . ? 
O239 Dy32 O178 77.4 . . ? 
O196 Dy32 Dy26 79.1 . . ? 
O192 Dy32 Dy26 37.2 . . ? 
O80 Dy32 Dy26 130.0 . . ? 
O149 Dy32 Dy26 36.9 . . ? 
O195 Dy32 Dy26 118.7 . . ? 
O215 Dy32 Dy26 76.7 . . ? 
O239 Dy32 Dy26 87.3 . . ? 
O178 Dy32 Dy26 147.1 . . ? 
O196 Dy32 Dy44 37.5 . . ? 
O192 Dy32 Dy44 37.2 . . ? 
O80 Dy32 Dy44 72.9 . . ? 
O149 Dy32 Dy44 78.2 . . ? 
O195 Dy32 Dy44 119.5 . . ? 
O215 Dy32 Dy44 137.0 . . ? 
O239 Dy32 Dy44 90.6 . . ? 
O178 Dy32 Dy44 144.9 . . ? 
Dy26 Dy32 Dy44 62.6 . . ? 
O196 Dy32 Dy37 35.9 . . ? 
O192 Dy32 Dy37 74.1 . . ? 
O80 Dy32 Dy37 115.0 . . ? 
O149 Dy32 Dy37 36.2 . . ? 
O195 Dy32 Dy37 71.9 . . ? 
O215 Dy32 Dy37 112.1 . . ? 
O239 Dy32 Dy37 141.6 . . ? 
O178 Dy32 Dy37 141.1 . . ? 
Dy26 Dy32 Dy37 59.2 . . ? 
Dy44 Dy32 Dy37 58.7 . . ? 
O196 Dy32 Dy23 104.9 . . ? 
O192 Dy32 Dy23 173.3 . . ? 
O80 Dy32 Dy23 81.0 . . ? 
O149 Dy32 Dy23 114.0 . . ? 
O195 Dy32 Dy23 34.8 . . ? 
O215 Dy32 Dy23 85.6 . . ? 
O239 Dy32 Dy23 112.6 . . ? 
O178 Dy32 Dy23 35.5 . . ? 
Dy26 Dy32 Dy23 148.4 . . ? 
Dy44 Dy32 Dy23 136.9 . . ? 
Dy37 Dy32 Dy23 105.8 . . ? 
O254 Dy33 O193 144.7 . . ? 
O254 Dy33 O240 71.4 . . ? 
O193 Dy33 O240 81.1 . . ? 
O254 Dy33 O141 95.6 . . ? 
O193 Dy33 O141 99.7 . . ? 
O240 Dy33 O141 77.1 . . ? 
O254 Dy33 O255 100.4 . . ? 
O193 Dy33 O255 91.3 . . ? 
O240 Dy33 O255 148.4 . . ? 
O141 Dy33 O255 134.5 . . ? 
O254 Dy33 O152 68.4 . . ? 
O193 Dy33 O152 146.7 . . ? 
O240 Dy33 O152 126.9 . . ? 
O141 Dy33 O152 73.8 . . ? 
O255 Dy33 O152 73.1 . . ? 
O254 Dy33 O191 72.3 . . ? 
O193 Dy33 O191 77.9 . . ? 
O240 Dy33 O191 70.6 . . ? 
O141 Dy33 O191 147.6 . . ? 
O255 Dy33 O191 77.8 . . ? 
O152 Dy33 O191 124.9 . . ? 
O254 Dy33 O256 146.9 . . ? 
O193 Dy33 O256 68.4 . . ? 
O240 Dy33 O256 131.9 . . ? 
O141 Dy33 O256 72.7 . . ? 
O255 Dy33 O256 70.8 . . ? 
O152 Dy33 O256 78.6 . . ? 
O191 Dy33 O256 132.6 . . ? 
O254 Dy33 Dy38 38.2 . . ? 
O193 Dy33 Dy38 115.2 . . ? 
O240 Dy33 Dy38 78.1 . . ? 
O141 Dy33 Dy38 132.8 . . ? 
O255 Dy33 Dy38 77.6 . . ? 
O152 Dy33 Dy38 90.5 . . ? 
O191 Dy33 Dy38 37.3 . . ? 
O256 Dy33 Dy38 148.4 . . ? 
O254 Dy33 Dy5 37.0 . . ? 
O193 Dy33 Dy5 119.0 . . ? 
O240 Dy33 Dy5 37.9 . . ? 
O141 Dy33 Dy5 74.1 . . ? 
O255 Dy33 Dy5 136.5 . . ? 
O152 Dy33 Dy5 91.2 . . ? 
O191 Dy33 Dy5 79.0 . . ? 
O256 Dy33 Dy5 146.7 . . ? 
Dy38 Dy33 Dy5 61.8 . . ? 
O254 Dy33 Dy20 75.8 . . ? 
O193 Dy33 Dy20 69.0 . . ? 
O240 Dy33 Dy20 35.5 . . ? 
O141 Dy33 Dy20 111.8 . . ? 
O255 Dy33 Dy20 113.3 . . ? 
O152 Dy33 Dy20 144.1 . . ? 
O191 Dy33 Dy20 36.8 . . ? 
O256 Dy33 Dy20 137.3 . . ? 
Dy38 Dy33 Dy20 58.9 . . ? 
Dy5 Dy33 Dy20 59.1 . . ? 
O254 Dy33 Dy18 124.7 . . ? 
O193 Dy33 Dy18 82.7 . . ? 
O240 Dy33 Dy18 163.5 . . ? 
O141 Dy33 Dy18 102.6 . . ? 
O255 Dy33 Dy18 35.1 . . ? 
O152 Dy33 Dy18 67.6 . . ? 
O191 Dy33 Dy18 109.0 . . ? 
O256 Dy33 Dy18 36.3 . . ? 
Dy38 Dy33 Dy18 112.1 . . ? 
Dy5 Dy33 Dy18 158.4 . . ? 
Dy20 Dy33 Dy18 138.1 . . ? 
O266 Dy34 O180 130.3 . . ? 
O266 Dy34 O135 74.2 . . ? 
O180 Dy34 O135 144.1 . . ? 
O266 Dy34 O137 69.2 . . ? 
O180 Dy34 O137 77.0 . . ? 
O135 Dy34 O137 138.4 . . ? 
O266 Dy34 O163 71.8 . . ? 
O180 Dy34 O163 128.3 . . ? 
O135 Dy34 O163 80.5 . . ? 
O137 Dy34 O163 69.9 . . ? 
O266 Dy34 O49 145.3 . . ? 
O180 Dy34 O49 77.5 . . ? 
O135 Dy34 O49 94.1 . . ? 
O137 Dy34 O49 104.7 . . ? 
O163 Dy34 O49 74.1 . . ? 
O266 Dy34 O96 126.1 . . ? 
O180 Dy34 O96 76.6 . . ? 
O135 Dy34 O96 67.5 . . ? 
O137 Dy34 O96 152.9 . . ? 
O163 Dy34 O96 133.2 . . ? 
O49 Dy34 O96 75.1 . . ? 
O266 Dy34 O236 73.2 . . ? 
O180 Dy34 O236 76.3 . . ? 
O135 Dy34 O236 90.4 . . ? 
O137 Dy34 O236 97.4 . . ? 
O163 Dy34 O236 145.0 . . ? 
O49 Dy34 O236 140.6 . . ? 
O96 Dy34 O236 70.6 . . ? 
O266 Dy34 Dy31 38.1 . . ? 
O180 Dy34 Dy31 154.3 . . ? 
O135 Dy34 Dy31 61.5 . . ? 
O137 Dy34 Dy31 77.4 . . ? 
O163 Dy34 Dy31 37.6 . . ? 
O49 Dy34 Dy31 107.5 . . ? 
O96 Dy34 Dy31 129.1 . . ? 
O236 Dy34 Dy31 108.9 . . ? 
O266 Dy34 Dy45 36.0 . . ? 
O180 Dy34 Dy45 98.6 . . ? 
O135 Dy34 Dy45 110.1 . . ? 
O137 Dy34 Dy45 35.8 . . ? 
O163 Dy34 Dy45 76.5 . . ? 
O49 Dy34 Dy45 137.8 . . ? 
O96 Dy34 Dy45 145.7 . . ? 
O236 Dy34 Dy45 75.2 . . ? 
Dy31 Dy34 Dy45 60.4 . . ? 
O266 Dy34 Dy25 76.5 . . ? 
O180 Dy34 Dy25 97.5 . . ? 
O135 Dy34 Dy25 115.4 . . ? 
O137 Dy34 Dy25 36.9 . . ? 
O163 Dy34 Dy25 35.7 . . ? 
O49 Dy34 Dy25 79.7 . . ? 
O96 Dy34 Dy25 154.7 . . ? 
O236 Dy34 Dy25 132.5 . . ? 
Dy31 Dy34 Dy25 59.9 . . ? 
Dy45 Dy34 Dy25 59.0 . . ? 
O266 Dy34 Dy40 102.1 . . ? 
O180 Dy34 Dy40 69.8 . . ? 
O135 Dy34 Dy40 80.3 . . ? 
O137 Dy34 Dy40 125.9 . . ? 
O163 Dy34 Dy40 160.8 . . ? 
O49 Dy34 Dy40 108.1 . . ? 
O96 Dy34 Dy40 36.4 . . ? 
O236 Dy34 Dy40 34.5 . . ? 
Dy31 Dy34 Dy40 128.8 . . ? 
Dy45 Dy34 Dy40 109.6 . . ? 
Dy25 Dy34 Dy40 162.5 . . ? 
O184 Dy35 O61 143.5 . . ? 
O184 Dy35 O194 66.7 . . ? 
O61 Dy35 O194 84.8 . . ? 
O184 Dy35 O46 104.7 . . ? 
O61 Dy35 O46 83.2 . . ? 
O194 Dy35 O46 141.6 . . ? 
O184 Dy35 O151 73.4 . . ? 
O61 Dy35 O151 142.0 . . ? 
O194 Dy35 O151 130.5 . . ? 
O46 Dy35 O151 75.5 . . ? 
O184 Dy35 O112 86.1 . . ? 
O61 Dy35 O112 106.4 . . ? 
O194 Dy35 O112 70.9 . . ? 
O46 Dy35 O112 147.4 . . ? 
O151 Dy35 O112 78.5 . . ? 
O184 Dy35 O189 72.1 . . ? 
O61 Dy35 O189 77.1 . . ? 
O194 Dy35 O189 70.1 . . ? 
O46 Dy35 O189 71.7 . . ? 
O151 Dy35 O189 123.4 . . ? 
O112 Dy35 O189 140.3 . . ? 
O184 Dy35 O53 144.7 . . ? 
O61 Dy35 O53 71.1 . . ? 
O194 Dy35 O53 127.6 . . ? 
O46 Dy35 O53 82.0 . . ? 
O151 Dy35 O53 75.0 . . ? 
O112 Dy35 O53 72.5 . . ? 
O189 Dy35 O53 140.6 . . ? 
O184 Dy35 Dy48 38.5 . . ? 
O61 Dy35 Dy48 115.1 . . ? 
O194 Dy35 Dy48 76.8 . . ? 
O46 Dy35 Dy48 75.7 . . ? 
O151 Dy35 Dy48 89.9 . . ? 
O112 Dy35 Dy48 123.8 . . ? 
O189 Dy35 Dy48 38.1 . . ? 
O53 Dy35 Dy48 155.7 . . ? 
O184 Dy35 Dy39 75.9 . . ? 
O61 Dy35 Dy39 67.8 . . ? 
O194 Dy35 Dy39 35.7 . . ? 
O46 Dy35 Dy39 106.5 . . ? 
O151 Dy35 Dy39 148.6 . . ? 
O112 Dy35 Dy39 105.9 . . ? 
O189 Dy35 Dy39 37.5 . . ? 
O53 Dy35 Dy39 136.3 . . ? 
Dy48 Dy35 Dy39 61.4 . . ? 
O184 Dy35 Dy50 33.5 . . ? 
O61 Dy35 Dy50 119.2 . . ? 
O194 Dy35 Dy50 34.9 . . ? 
O46 Dy35 Dy50 134.0 . . ? 
O151 Dy35 Dy50 98.0 . . ? 
O112 Dy35 Dy50 68.8 . . ? 
O189 Dy35 Dy50 75.2 . . ? 
O53 Dy35 Dy50 141.3 . . ? 
Dy48 Dy35 Dy50 58.6 . . ? 
Dy39 Dy35 Dy50 57.3 . . ? 
O251 Dy36 O219 73.0 . . ? 
O251 Dy36 O213 125.4 . . ? 
O219 Dy36 O213 148.3 . . ? 
O251 Dy36 O164 145.2 . . ? 
O219 Dy36 O164 98.1 . . ? 
O213 Dy36 O164 79.6 . . ? 
O251 Dy36 O249 71.8 . . ? 
O219 Dy36 O249 138.0 . . ? 
O213 Dy36 O249 73.0 . . ? 
O164 Dy36 O249 97.8 . . ? 
O251 Dy36 O145 71.5 . . ? 
O219 Dy36 O145 80.7 . . ? 
O213 Dy36 O145 127.5 . . ? 
O164 Dy36 O145 73.9 . . ? 
O249 Dy36 O145 67.0 . . ? 
O251 Dy36 O241 126.5 . . ? 
O219 Dy36 O241 67.1 . . ? 
O213 Dy36 O241 81.8 . . ? 
O164 Dy36 O241 76.0 . . ? 
O249 Dy36 O241 154.8 . . ? 
O145 Dy36 O241 131.6 . . ? 
O251 Dy36 O261 73.5 . . ? 
O219 Dy36 O261 86.5 . . ? 
O213 Dy36 O261 76.7 . . ? 
O164 Dy36 O261 140.7 . . ? 
O249 Dy36 O261 104.6 . . ? 
O145 Dy36 O261 144.9 . . ? 
O241 Dy36 O261 70.0 . . ? 
O251 Dy36 Dy46 37.7 . . ? 
O219 Dy36 Dy46 60.3 . . ? 
O213 Dy36 Dy46 150.6 . . ? 
O164 Dy36 Dy46 108.4 . . ? 
O249 Dy36 Dy46 77.8 . . ? 
O145 Dy36 Dy46 38.2 . . ? 
O241 Dy36 Dy46 127.4 . . ? 
O261 Dy36 Dy46 107.7 . . ? 
O251 Dy36 Dy27 36.6 . . ? 
O219 Dy36 Dy27 109.7 . . ? 
O213 Dy36 Dy27 92.5 . . ? 
O164 Dy36 Dy27 135.6 . . ? 
O249 Dy36 Dy27 39.2 . . ? 
O145 Dy36 Dy27 77.2 . . ? 
O241 Dy36 Dy27 146.5 . . ? 
O261 Dy36 Dy27 76.6 . . ? 
Dy46 Dy36 Dy27 61.5 . . ? 
O251 Dy36 Dy24 106.9 . . ? 
O219 Dy36 Dy24 35.5 . . ? 
O213 Dy36 Dy24 115.5 . . ? 
O164 Dy36 Dy24 76.4 . . ? 
O249 Dy36 Dy24 168.0 . . ? 
O145 Dy36 Dy24 101.1 . . ? 
O241 Dy36 Dy24 34.6 . . ? 
O261 Dy36 Dy24 86.2 . . ? 
Dy46 Dy36 Dy24 93.9 . . ? 
Dy27 Dy36 Dy24 142.7 . . ? 
O251 Dy36 Dy20 103.4 . . ? 
O219 Dy36 Dy20 78.4 . . ? 
O213 Dy36 Dy20 72.4 . . ? 
O164 Dy36 Dy20 107.6 . . ? 
O249 Dy36 Dy20 131.8 . . ? 
O145 Dy36 Dy20 159.1 . . ? 
O241 Dy36 Dy20 35.6 . . ? 
O261 Dy36 Dy20 34.9 . . ? 
Dy46 Dy36 Dy20 127.9 . . ? 
Dy27 Dy36 Dy20 111.3 . . ? 
Dy24 Dy36 Dy20 60.2 . . ? 
O260 Dy37 O221 146.3 . . ? 
O260 Dy37 O196 81.6 . . ? 
O221 Dy37 O196 73.2 . . ? 
O260 Dy37 O149 78.9 . . ? 
O221 Dy37 O149 72.0 . . ? 
O196 Dy37 O149 70.8 . . ? 
O260 Dy37 O168 97.6 . . ? 
O221 Dy37 O168 97.4 . . ? 
O196 Dy37 O168 75.6 . . ? 
O149 Dy37 O168 146.4 . . ? 
O260 Dy37 O242 68.9 . . ? 
O221 Dy37 O242 144.7 . . ? 
O196 Dy37 O242 132.1 . . ? 
O149 Dy37 O242 133.9 . . ? 
O168 Dy37 O242 72.1 . . ? 
O260 Dy37 O159 144.6 . . ? 
O221 Dy37 O159 69.0 . . ? 
O196 Dy37 O159 125.7 . . ? 
O149 Dy37 O159 128.0 . . ? 
O168 Dy37 O159 72.3 . . ? 
O242 Dy37 O159 75.8 . . ? 
O260 Dy37 O270 90.0 . . ? 
O221 Dy37 O270 98.9 . . ? 
O196 Dy37 O270 146.8 . . ? 
O149 Dy37 O270 76.0 . . ? 
O168 Dy37 O270 137.6 . . ? 
O242 Dy37 O270 72.0 . . ? 
O159 Dy37 O270 77.6 . . ? 
O260 Dy37 Dy44 120.2 . . ? 
O221 Dy37 Dy44 38.4 . . ? 
O196 Dy37 Dy44 38.7 . . ? 
O149 Dy37 Dy44 79.6 . . ? 
O168 Dy37 Dy44 73.5 . . ? 
O242 Dy37 Dy44 145.3 . . ? 
O159 Dy37 Dy44 90.0 . . ? 
O270 Dy37 Dy44 136.2 . . ? 
O260 Dy37 Dy26 115.8 . . ? 
O221 Dy37 Dy26 38.3 . . ? 
O196 Dy37 Dy26 79.4 . . ? 
O149 Dy37 Dy26 37.0 . . ? 
O168 Dy37 Dy26 134.4 . . ? 
O242 Dy37 Dy26 147.3 . . ? 
O159 Dy37 Dy26 93.2 . . ? 
O270 Dy37 Dy26 75.6 . . ? 
Dy44 Dy37 Dy26 63.3 . . ? 
O260 Dy37 Dy32 69.7 . . ? 
O221 Dy37 Dy32 76.8 . . ? 
O196 Dy37 Dy32 36.0 . . ? 
O149 Dy37 Dy32 36.5 . . ? 
O168 Dy37 Dy32 110.7 . . ? 
O242 Dy37 Dy32 138.5 . . ? 
O159 Dy37 Dy32 145.6 . . ? 
O270 Dy37 Dy32 111.0 . . ? 
Dy44 Dy37 Dy32 60.2 . . ? 
Dy26 Dy37 Dy32 59.4 . . ? 
O260 Dy37 Dy19 35.1 . . ? 
O221 Dy37 Dy19 174.3 . . ? 
O196 Dy37 Dy19 103.6 . . ? 
O149 Dy37 Dy19 111.7 . . ? 
O168 Dy37 Dy19 77.1 . . ? 
O242 Dy37 Dy19 35.2 . . ? 
O159 Dy37 Dy19 110.3 . . ? 
O270 Dy37 Dy19 86.3 . . ? 
Dy44 Dy37 Dy19 136.8 . . ? 
Dy26 Dy37 Dy19 146.6 . . ? 
Dy32 Dy37 Dy19 103.5 . . ? 
O191 Dy38 O105 142.4 . . ? 
O191 Dy38 O271 78.8 . . ? 
O105 Dy38 O271 137.6 . . ? 
O191 Dy38 O121 78.0 . . ? 
O105 Dy38 O121 73.4 . . ? 
O271 Dy38 O121 122.0 . . ? 
O191 Dy38 O230 73.3 . . ? 
O105 Dy38 O230 77.3 . . ? 
O271 Dy38 O230 141.0 . . ? 
O121 Dy38 O230 78.1 . . ? 
O191 Dy38 O210 141.1 . . ? 
O105 Dy38 O210 70.9 . . ? 
O271 Dy38 O210 77.6 . . ? 
O121 Dy38 O210 140.9 . . ? 
O230 Dy38 O210 108.6 . . ? 
O191 Dy38 O254 74.0 . . ? 
O105 Dy38 O254 115.4 . . ? 
O271 Dy38 O254 78.7 . . ? 
O121 Dy38 O254 140.7 . . ? 
O230 Dy38 O254 67.9 . . ? 
O210 Dy38 O254 71.4 . . ? 
O191 Dy38 O209 105.7 . . ? 
O105 Dy38 O209 86.2 . . ? 
O271 Dy38 O209 67.9 . . ? 
O121 Dy38 O209 68.7 . . ? 
O230 Dy38 O209 146.0 . . ? 
O210 Dy38 O209 93.3 . . ? 
O254 Dy38 O209 145.7 . . ? 
O191 Dy38 Dy20 38.1 . . ? 
O105 Dy38 Dy20 105.8 . . ? 
O271 Dy38 Dy20 116.4 . . ? 
O121 Dy38 Dy20 63.3 . . ? 
O230 Dy38 Dy20 38.4 . . ? 
O210 Dy38 Dy20 142.8 . . ? 
O254 Dy38 Dy20 77.7 . . ? 
O209 Dy38 Dy20 123.8 . . ? 
O191 Dy38 Dy33 39.9 . . ? 
O105 Dy38 Dy33 149.4 . . ? 
O271 Dy38 Dy33 63.7 . . ? 
O121 Dy38 Dy33 117.4 . . ? 
O230 Dy38 Dy33 77.5 . . ? 
O210 Dy38 Dy33 101.5 . . ? 
O254 Dy38 Dy33 37.5 . . ? 
O209 Dy38 Dy33 124.3 . . ? 
Dy20 Dy38 Dy33 61.9 . . ? 
O191 Dy38 Dy5 78.9 . . ? 
O105 Dy38 Dy5 89.5 . . ? 
O271 Dy38 Dy5 114.5 . . ? 
O121 Dy38 Dy5 111.9 . . ? 
O230 Dy38 Dy5 33.9 . . ? 
O210 Dy38 Dy5 83.4 . . ? 
O254 Dy38 Dy5 35.9 . . ? 
O209 Dy38 Dy5 175.3 . . ? 
Dy20 Dy38 Dy5 59.4 . . ? 
Dy33 Dy38 Dy5 59.9 . . ? 
O157 Dy39 O194 91.5 . . ? 
O157 Dy39 O224 133.8 . . ? 
O194 Dy39 O224 105.1 . . ? 
O157 Dy39 O101 146.3 . . ? 
O194 Dy39 O101 72.0 . . ? 
O224 Dy39 O101 79.6 . . ? 
O157 Dy39 O208 72.0 . . ? 
O194 Dy39 O208 147.4 . . ? 
O224 Dy39 O208 71.2 . . ? 
O101 Dy39 O208 135.5 . . ? 
O157 Dy39 O187 105.2 . . ? 
O194 Dy39 O187 146.2 . . ? 
O224 Dy39 O187 84.5 . . ? 
O101 Dy39 O187 78.2 . . ? 
O208 Dy39 O187 66.4 . . ? 
O157 Dy39 O189 75.7 . . ? 
O194 Dy39 O189 71.1 . . ? 
O224 Dy39 O189 150.4 . . ? 
O101 Dy39 O189 71.3 . . ? 
O208 Dy39 O189 127.9 . . ? 
O187 Dy39 O189 84.6 . . ? 
O157 Dy39 O158 72.3 . . ? 
O194 Dy39 O158 70.7 . . ? 
O224 Dy39 O158 73.2 . . ? 
O101 Dy39 O158 125.3 . . ? 
O208 Dy39 O158 77.4 . . ? 
O187 Dy39 O158 142.1 . . ? 
O189 Dy39 O158 128.6 . . ? 
O157 Dy39 Dy50 129.9 . . ? 
O194 Dy39 Dy50 38.9 . . ? 
O224 Dy39 Dy50 80.2 . . ? 
O101 Dy39 Dy50 37.2 . . ? 
O208 Dy39 Dy50 151.1 . . ? 
O187 Dy39 Dy50 115.2 . . ? 
O189 Dy39 Dy50 79.8 . . ? 
O158 Dy39 Dy50 91.1 . . ? 
O157 Dy39 Dy35 71.2 . . ? 
O194 Dy39 Dy35 36.1 . . ? 
O224 Dy39 Dy35 140.3 . . ? 
O101 Dy39 Dy35 78.8 . . ? 
O208 Dy39 Dy35 143.2 . . ? 
O187 Dy39 Dy35 122.6 . . ? 
O189 Dy39 Dy35 38.2 . . ? 
O158 Dy39 Dy35 93.0 . . ? 
Dy50 Dy39 Dy35 62.6 . . ? 
O157 Dy39 Dy48 110.9 . . ? 
O194 Dy39 Dy48 74.3 . . ? 
O224 Dy39 Dy48 115.1 . . ? 
O101 Dy39 Dy48 37.1 . . ? 
O208 Dy39 Dy48 137.5 . . ? 
O187 Dy39 Dy48 72.3 . . ? 
O189 Dy39 Dy48 35.4 . . ? 
O158 Dy39 Dy48 145.0 . . ? 
Dy50 Dy39 Dy48 59.3 . . ? 
Dy35 Dy39 Dy48 58.1 . . ? 
O157 Dy39 Dy14 80.0 . . ? 
O194 Dy39 Dy14 169.7 . . ? 
O224 Dy39 Dy14 85.1 . . ? 
O101 Dy39 Dy14 112.3 . . ? 
O208 Dy39 Dy14 34.3 . . ? 
O187 Dy39 Dy14 34.6 . . ? 
O189 Dy39 Dy14 101.0 . . ? 
O158 Dy39 Dy14 111.5 . . ? 
Dy50 Dy39 Dy14 148.1 . . ? 
Dy35 Dy39 Dy14 134.2 . . ? 
Dy48 Dy39 Dy14 103.3 . . ? 
O236 Dy40 O123 74.9 . . ? 
O236 Dy40 O264 150.9 . . ? 
O123 Dy40 O264 124.6 . . ? 
O236 Dy40 O115 136.2 . . ? 
O123 Dy40 O115 76.5 . . ? 
O264 Dy40 O115 72.7 . . ? 
O236 Dy40 O252 98.1 . . ? 
O123 Dy40 O252 70.5 . . ? 
O264 Dy40 O252 72.9 . . ? 
O115 Dy40 O252 102.7 . . ? 
O236 Dy40 O257 79.0 . . ? 
O123 Dy40 O257 128.3 . . ? 
O264 Dy40 O257 71.9 . . ? 
O115 Dy40 O257 144.4 . . ? 
O252 Dy40 O257 70.1 . . ? 
O236 Dy40 O197 89.6 . . ? 
O123 Dy40 O197 140.2 . . ? 
O264 Dy40 O197 85.9 . . ? 
O115 Dy40 O197 91.7 . . ? 
O252 Dy40 O197 149.0 . . ? 
O257 Dy40 O197 82.2 . . ? 
O236 Dy40 O96 72.4 . . ? 
O123 Dy40 O96 75.8 . . ? 
O264 Dy40 O96 129.8 . . ? 
O115 Dy40 O96 68.9 . . ? 
O252 Dy40 O96 146.3 . . ? 
O257 Dy40 O96 135.5 . . ? 
O197 Dy40 O96 64.6 . . ? 
O236 Dy40 Dy42 135.0 . . ? 
O123 Dy40 Dy42 88.8 . . ? 
O264 Dy40 Dy42 39.7 . . ? 
O115 Dy40 Dy42 76.0 . . ? 
O252 Dy40 Dy42 37.2 . . ? 
O257 Dy40 Dy42 79.3 . . ? 
O197 Dy40 Dy42 125.5 . . ? 
O96 Dy40 Dy42 144.0 . . ? 
O236 Dy40 Dy43 78.1 . . ? 
O123 Dy40 Dy43 94.7 . . ? 
O264 Dy40 Dy43 78.7 . . ? 
O115 Dy40 Dy43 136.8 . . ? 
O252 Dy40 Dy43 36.7 . . ? 
O257 Dy40 Dy43 36.0 . . ? 
O197 Dy40 Dy43 118.1 . . ? 
O96 Dy40 Dy43 150.5 . . ? 
Dy42 Dy40 Dy43 61.4 . . ? 
O236 Dy40 Dy21 115.5 . . ? 
O123 Dy40 Dy21 145.3 . . ? 
O264 Dy40 Dy21 35.8 . . ? 
O115 Dy40 Dy21 106.9 . . ? 
O252 Dy40 Dy21 75.2 . . ? 
O257 Dy40 Dy21 37.7 . . ? 
O197 Dy40 Dy21 74.4 . . ? 
O96 Dy40 Dy21 138.4 . . ? 
Dy42 Dy40 Dy21 59.9 . . ? 
Dy43 Dy40 Dy21 58.6 . . ? 
O236 Dy40 Dy34 36.3 . . ? 
O123 Dy40 Dy34 68.1 . . ? 
O264 Dy40 Dy34 162.6 . . ? 
O115 Dy40 Dy34 101.8 . . ? 
O252 Dy40 Dy34 124.5 . . ? 
O257 Dy40 Dy34 110.9 . . ? 
O197 Dy40 Dy34 77.7 . . ? 
O96 Dy40 Dy34 36.5 . . ? 
Dy42 Dy40 Dy34 156.5 . . ? 
Dy43 Dy40 Dy34 114.0 . . ? 
Dy21 Dy40 Dy34 140.1 . . ? 
O109 Dy41 O201 90.8 . . ? 
O109 Dy41 O245 109.0 . . ? 
O201 Dy41 O245 130.5 . . ? 
O109 Dy41 O243 71.1 . . ? 
O201 Dy41 O243 79.1 . . ? 
O245 Dy41 O243 149.9 . . ? 
O109 Dy41 O246 73.8 . . ? 
O201 Dy41 O246 149.2 . . ? 
O245 Dy41 O246 80.2 . . ? 
O243 Dy41 O246 70.8 . . ? 
O109 Dy41 O247 143.8 . . ? 
O201 Dy41 O247 104.8 . . ? 
O245 Dy41 O247 85.6 . . ? 
O243 Dy41 O247 80.0 . . ? 
O246 Dy41 O247 76.6 . . ? 
O109 Dy41 O55 68.3 . . ? 
O201 Dy41 O55 70.6 . . ? 
O245 Dy41 O55 75.4 . . ? 
O243 Dy41 O55 128.1 . . ? 
O246 Dy41 O55 124.2 . . ? 
O247 Dy41 O55 147.5 . . ? 
O109 Dy41 O233 148.2 . . ? 
O201 Dy41 O233 70.2 . . ? 
O245 Dy41 O233 69.8 . . ? 
O243 Dy41 O233 126.5 . . ? 
O246 Dy41 O233 134.3 . . ? 
O247 Dy41 O233 67.6 . . ? 
O55 Dy41 O233 81.1 . . ? 
O109 Dy41 Dy15 39.5 . . ? 
O201 Dy41 Dy15 130.2 . . ? 
O245 Dy41 Dy15 82.6 . . ? 
O243 Dy41 Dy15 80.0 . . ? 
O246 Dy41 Dy15 38.7 . . ? 
O247 Dy41 Dy15 115.3 . . ? 
O55 Dy41 Dy15 88.4 . . ? 
O233 Dy41 Dy15 152.1 . . ? 
O109 Dy41 Dy6 36.8 . . ? 
O201 Dy41 Dy6 71.5 . . ? 
O245 Dy41 Dy6 144.8 . . ? 
O243 Dy41 Dy6 38.1 . . ? 
O246 Dy41 Dy6 80.7 . . ? 
O247 Dy41 Dy6 118.1 . . ? 
O55 Dy41 Dy6 91.6 . . ? 
O233 Dy41 Dy6 141.2 . . ? 
Dy15 Dy41 Dy6 64.3 . . ? 
O109 Dy41 Dy17 75.1 . . ? 
O201 Dy41 Dy17 114.6 . . ? 
O245 Dy41 Dy17 114.2 . . ? 
O243 Dy41 Dy17 35.7 . . ? 
O246 Dy41 Dy17 36.3 . . ? 
O247 Dy41 Dy17 68.8 . . ? 
O55 Dy41 Dy17 143.2 . . ? 
O233 Dy41 Dy17 135.7 . . ? 
Dy15 Dy41 Dy17 59.7 . . ? 
Dy6 Dy41 Dy17 59.5 . . ? 
O109 Dy41 Dy29 167.6 . . ? 
O201 Dy41 Dy29 80.4 . . ? 
O245 Dy41 Dy29 83.4 . . ? 
O243 Dy41 Dy29 98.6 . . ? 
O246 Dy41 Dy29 109.9 . . ? 
O247 Dy41 Dy29 34.3 . . ? 
O55 Dy41 Dy29 115.9 . . ? 
O233 Dy41 Dy29 35.0 . . ? 
Dy15 Dy41 Dy29 147.5 . . ? 
Dy6 Dy41 Dy29 131.1 . . ? 
Dy17 Dy41 Dy29 100.7 . . ? 
O94 Dy42 O176 113.0 . . ? 
O94 Dy42 O252 79.7 . . ? 
O176 Dy42 O252 146.1 . . ? 
O94 Dy42 O111 139.8 . . ? 
O176 Dy42 O111 83.0 . . ? 
O252 Dy42 O111 69.3 . . ? 
O94 Dy42 O244 74.4 . . ? 
O176 Dy42 O244 73.5 . . ? 
O252 Dy42 O244 139.9 . . ? 
O111 Dy42 O244 145.1 . . ? 
O94 Dy42 O59 85.0 . . ? 
O176 Dy42 O59 138.7 . . ? 
O252 Dy42 O59 70.9 . . ? 
O111 Dy42 O59 107.4 . . ? 
O244 Dy42 O59 76.7 . . ? 
O94 Dy42 O264 74.8 . . ? 
O176 Dy42 O264 80.6 . . ? 
O252 Dy42 O264 72.5 . . ? 
O111 Dy42 O264 71.8 . . ? 
O244 Dy42 O264 127.2 . . ? 
O59 Dy42 O264 140.7 . . ? 
O94 Dy42 O43 132.8 . . ? 
O176 Dy42 O43 92.3 . . ? 
O252 Dy42 O43 101.4 . . ? 
O111 Dy42 O43 79.7 . . ? 
O244 Dy42 O43 75.9 . . ? 
O59 Dy42 O43 52.8 . . ? 
O264 Dy42 O43 151.2 . . ? 
O94 Dy42 C107 108.5 . . ? 
O176 Dy42 C107 117.3 . . ? 
O252 Dy42 C107 84.9 . . ? 
O111 Dy42 C107 94.1 . . ? 
O244 Dy42 C107 75.1 . . ? 
O59 Dy42 C107 25.3 . . ? 
O264 Dy42 C107 156.3 . . ? 
O43 Dy42 C107 27.4 . . ? 
O94 Dy42 Dy40 61.1 . . ? 
O176 Dy42 Dy40 119.0 . . ? 
O252 Dy42 Dy40 38.1 . . ? 
O111 Dy42 Dy40 78.8 . . ? 
O244 Dy42 Dy40 135.3 . . ? 
O59 Dy42 Dy40 102.3 . . ? 
O264 Dy42 Dy40 38.3 . . ? 
O43 Dy42 Dy40 139.0 . . ? 
C107 Dy42 Dy40 121.7 . . ? 
O94 Dy42 Dy21 111.8 . . ? 
O176 Dy42 Dy21 69.5 . . ? 
O252 Dy42 Dy21 76.6 . . ? 
O111 Dy42 Dy21 37.2 . . ? 
O244 Dy42 Dy21 141.8 . . ? 
O59 Dy42 Dy21 139.9 . . ? 
O264 Dy42 Dy21 37.2 . . ? 
O43 Dy42 Dy21 114.2 . . ? 
C107 Dy42 Dy21 131.2 . . ? 
Dy40 Dy42 Dy21 61.1 . . ? 
O94 Dy42 Dy43 114.3 . . ? 
O176 Dy42 Dy43 118.9 . . ? 
O252 Dy42 Dy43 35.2 . . ? 
O111 Dy42 Dy43 36.0 . . ? 
O244 Dy42 Dy43 155.7 . . ? 
O59 Dy42 Dy43 81.5 . . ? 
O264 Dy42 Dy43 76.9 . . ? 
O43 Dy42 Dy43 82.5 . . ? 
C107 Dy42 Dy43 80.6 . . ? 
Dy40 Dy42 Dy43 60.0 . . ? 
Dy21 Dy42 Dy43 58.5 . . ? 
O257 Dy43 O237 77.0 . . ? 
O257 Dy43 O175 147.9 . . ? 
O237 Dy43 O175 134.0 . . ? 
O257 Dy43 O252 71.5 . . ? 
O237 Dy43 O252 140.0 . . ? 
O175 Dy43 O252 82.7 . . ? 
O257 Dy43 O229 75.8 . . ? 
O237 Dy43 O229 118.9 . . ? 
O175 Dy43 O229 79.9 . . ? 
O252 Dy43 O229 76.5 . . ? 
O257 Dy43 O111 73.9 . . ? 
O237 Dy43 O111 79.8 . . ? 
O175 Dy43 O111 114.3 . . ? 
O252 Dy43 O111 68.3 . . ? 
O229 Dy43 O111 139.1 . . ? 
O257 Dy43 O268 136.1 . . ? 
O237 Dy43 O268 74.2 . . ? 
O175 Dy43 O268 71.7 . . ? 
O252 Dy43 O268 113.5 . . ? 
O229 Dy43 O268 147.8 . . ? 
O111 Dy43 O268 69.0 . . ? 
O257 Dy43 O223 108.3 . . ? 
O237 Dy43 O223 71.5 . . ? 
O175 Dy43 O223 80.6 . . ? 
O252 Dy43 O223 142.0 . . ? 
O229 Dy43 O223 67.1 . . ? 
O111 Dy43 O223 149.6 . . ? 
O268 Dy43 O223 93.0 . . ? 
O257 Dy43 Dy21 39.2 . . ? 
O237 Dy43 Dy21 62.5 . . ? 
O175 Dy43 Dy21 151.2 . . ? 
O252 Dy43 Dy21 77.4 . . ? 
O229 Dy43 Dy21 114.7 . . ? 
O111 Dy43 Dy21 38.5 . . ? 
O268 Dy43 Dy21 97.5 . . ? 
O223 Dy43 Dy21 127.4 . . ? 
O257 Dy43 Dy40 37.1 . . ? 
O237 Dy43 Dy40 113.8 . . ? 
O175 Dy43 Dy40 112.0 . . ? 
O252 Dy43 Dy40 37.2 . . ? 
O229 Dy43 Dy40 62.1 . . ? 
O111 Dy43 Dy40 77.2 . . ? 
O268 Dy43 Dy40 143.4 . . ? 
O223 Dy43 Dy40 123.5 . . ? 
Dy21 Dy43 Dy40 61.1 . . ? 
O257 Dy43 Dy42 77.6 . . ? 
O237 Dy43 Dy42 114.6 . . ? 
O175 Dy43 Dy42 92.2 . . ? 
O252 Dy43 Dy42 34.8 . . ? 
O229 Dy43 Dy42 111.2 . . ? 
O111 Dy43 Dy42 35.3 . . ? 
O268 Dy43 Dy42 85.3 . . ? 
O223 Dy43 Dy42 172.8 . . ? 
Dy21 Dy43 Dy42 59.8 . . ? 
Dy40 Dy43 Dy42 58.6 . . ? 
O81 Dy44 O90 137.4 . . ? 
O81 Dy44 O143 83.4 . . ? 
O90 Dy44 O143 106.7 . . ? 
O81 Dy44 O192 113.4 . . ? 
O90 Dy44 O192 82.6 . . ? 
O143 Dy44 O192 144.2 . . ? 
O81 Dy44 O221 74.7 . . ? 
O90 Dy44 O221 144.4 . . ? 
O143 Dy44 O221 89.4 . . ? 
O192 Dy44 O221 67.0 . . ? 
O81 Dy44 O196 141.3 . . ? 
O90 Dy44 O196 80.7 . . ? 
O143 Dy44 O196 77.3 . . ? 
O192 Dy44 O196 70.1 . . ? 
O221 Dy44 O196 71.9 . . ? 
O81 Dy44 O40 72.8 . . ? 
O90 Dy44 O40 75.7 . . ? 
O143 Dy44 O40 143.3 . . ? 
O192 Dy44 O40 72.2 . . ? 
O221 Dy44 O40 110.0 . . ? 
O196 Dy44 O40 137.6 . . ? 
O81 Dy44 O33 74.9 . . ? 
O90 Dy44 O33 70.0 . . ? 
O143 Dy44 O33 71.2 . . ? 
O192 Dy44 O33 142.0 . . ? 
O221 Dy44 O33 145.5 . . ? 
O196 Dy44 O33 127.6 . . ? 
O40 Dy44 O33 75.7 . . ? 
O81 Dy44 Dy37 103.8 . . ? 
O90 Dy44 Dy37 118.6 . . ? 
O143 Dy44 Dy37 69.4 . . ? 
O192 Dy44 Dy37 75.8 . . ? 
O221 Dy44 Dy37 37.8 . . ? 
O196 Dy44 Dy37 37.9 . . ? 
O40 Dy44 Dy37 142.8 . . ? 
O33 Dy44 Dy37 140.4 . . ? 
O81 Dy44 Dy32 146.5 . . ? 
O90 Dy44 Dy32 67.4 . . ? 
O143 Dy44 Dy32 114.1 . . ? 
O192 Dy44 Dy32 36.9 . . ? 
O221 Dy44 Dy32 77.1 . . ? 
O196 Dy44 Dy32 36.9 . . ? 
O40 Dy44 Dy32 100.8 . . ? 
O33 Dy44 Dy32 136.6 . . ? 
Dy37 Dy44 Dy32 61.1 . . ? 
O81 Dy44 Dy26 88.4 . . ? 
O90 Dy44 Dy26 116.3 . . ? 
O143 Dy44 Dy26 123.2 . . ? 
O192 Dy44 Dy26 33.8 . . ? 
O221 Dy44 Dy26 34.9 . . ? 
O196 Dy44 Dy26 75.2 . . ? 
O40 Dy44 Dy26 84.4 . . ? 
O33 Dy44 Dy26 157.0 . . ? 
Dy37 Dy44 Dy26 58.4 . . ? 
Dy32 Dy44 Dy26 58.1 . . ? 
O120 Dy45 O137 127.6 . . ? 
O120 Dy45 O186 146.6 . . ? 
O137 Dy45 O186 76.7 . . ? 
O120 Dy45 O266 132.0 . . ? 
O137 Dy45 O266 68.7 . . ? 
O186 Dy45 O266 74.7 . . ? 
O120 Dy45 O72 72.5 . . ? 
O137 Dy45 O72 73.0 . . ? 
O186 Dy45 O72 140.9 . . ? 
O266 Dy45 O72 71.6 . . ? 
O120 Dy45 O202 72.5 . . ? 
O137 Dy45 O202 77.6 . . ? 
O186 Dy45 O202 94.9 . . ? 
O266 Dy45 O202 146.1 . . ? 
O72 Dy45 O202 102.1 . . ? 
O120 Dy45 O245 79.6 . . ? 
O137 Dy45 O245 143.7 . . ? 
O186 Dy45 O245 91.6 . . ? 
O266 Dy45 O245 75.1 . . ? 
O72 Dy45 O245 98.3 . . ? 
O202 Dy45 O245 138.2 . . ? 
O120 Dy45 O233 78.4 . . ? 
O137 Dy45 O233 132.6 . . ? 
O186 Dy45 O233 68.4 . . ? 
O266 Dy45 O233 127.2 . . ? 
O72 Dy45 O233 150.2 . . ? 
O202 Dy45 O233 74.5 . . ? 
O245 Dy45 O233 69.8 . . ? 
O120 Dy45 Dy25 93.1 . . ? 
O137 Dy45 Dy25 38.3 . . ? 
O186 Dy45 Dy25 114.9 . . ? 
O266 Dy45 Dy25 77.6 . . ? 
O72 Dy45 Dy25 38.4 . . ? 
O202 Dy45 Dy25 78.1 . . ? 
O245 Dy45 Dy25 134.8 . . ? 
O233 Dy45 Dy25 152.6 . . ? 
O120 Dy45 Dy31 97.3 . . ? 
O137 Dy45 Dy31 76.4 . . ? 
O186 Dy45 Dy31 112.1 . . ? 
O266 Dy45 Dy31 37.4 . . ? 
O72 Dy45 Dy31 36.7 . . ? 
O202 Dy45 Dy31 136.6 . . ? 
O245 Dy45 Dy31 76.5 . . ? 
O233 Dy45 Dy31 146.2 . . ? 
Dy25 Dy45 Dy31 60.1 . . ? 
O120 Dy45 Dy34 150.6 . . ? 
O137 Dy45 Dy34 36.1 . . ? 
O186 Dy45 Dy34 62.7 . . ? 
O266 Dy45 Dy34 35.1 . . ? 
O72 Dy45 Dy34 78.3 . . ? 
O202 Dy45 Dy34 111.5 . . ? 
O245 Dy45 Dy34 108.1 . . ? 
O233 Dy45 Dy34 131.0 . . ? 
Dy25 Dy45 Dy34 60.9 . . ? 
Dy31 Dy45 Dy34 59.0 . . ? 
O120 Dy45 Dy41 69.7 . . ? 
O137 Dy45 Dy41 161.7 . . ? 
O186 Dy45 Dy41 85.0 . . ? 
O266 Dy45 Dy41 105.4 . . ? 
O72 Dy45 Dy41 122.6 . . ? 
O202 Dy45 Dy41 105.6 . . ? 
O245 Dy45 Dy41 34.0 . . ? 
O233 Dy45 Dy41 36.9 . . ? 
Dy25 Dy45 Dy41 159.7 . . ? 
Dy31 Dy45 Dy41 109.9 . . ? 
Dy34 Dy45 Dy41 131.8 . . ? 
O177 Dy46 O52 109.2 . . ? 
O177 Dy46 O145 141.0 . . ? 
O52 Dy46 O145 92.7 . . ? 
O177 Dy46 O251 73.2 . . ? 
O52 Dy46 O251 147.7 . . ? 
O145 Dy46 O251 71.4 . . ? 
O177 Dy46 O226 82.0 . . ? 
O52 Dy46 O226 78.3 . . ? 
O145 Dy46 O226 71.0 . . ? 
O251 Dy46 O226 70.0 . . ? 
O177 Dy46 O270 81.8 . . ? 
O52 Dy46 O270 134.5 . . ? 
O145 Dy46 O270 105.8 . . ? 
O251 Dy46 O270 77.7 . . ? 
O226 Dy46 O270 146.9 . . ? 
O177 Dy46 O242 65.3 . . ? 
O52 Dy46 O242 73.5 . . ? 
O145 Dy46 O242 153.7 . . ? 
O251 Dy46 O242 131.0 . . ? 
O226 Dy46 O242 125.4 . . ? 
O270 Dy46 O242 71.9 . . ? 
O177 Dy46 O199 145.0 . . ? 
O52 Dy46 O199 75.6 . . ? 
O145 Dy46 O199 70.6 . . ? 
O251 Dy46 O199 121.7 . . ? 
O226 Dy46 O199 131.9 . . ? 
O270 Dy46 O199 72.3 . . ? 
O242 Dy46 O199 84.2 . . ? 
O177 Dy46 Dy36 109.5 . . ? 
O52 Dy46 Dy36 131.4 . . ? 
O145 Dy46 Dy36 39.1 . . ? 
O251 Dy46 Dy36 36.6 . . ? 
O226 Dy46 Dy36 79.2 . . ? 
O270 Dy46 Dy36 79.3 . . ? 
O242 Dy46 Dy36 151.2 . . ? 
O199 Dy46 Dy36 88.7 . . ? 
O177 Dy46 Dy30 119.6 . . ? 
O52 Dy46 Dy30 72.5 . . ? 
O145 Dy46 Dy30 36.7 . . ? 
O251 Dy46 Dy30 78.5 . . ? 
O226 Dy46 Dy30 38.1 . . ? 
O270 Dy46 Dy30 141.0 . . ? 
O242 Dy46 Dy30 145.0 . . ? 
O199 Dy46 Dy30 95.1 . . ? 
Dy36 Dy46 Dy30 63.3 . . ? 
O177 Dy46 Dy27 65.6 . . ? 
O52 Dy46 Dy27 114.4 . . ? 
O145 Dy46 Dy27 76.1 . . ? 
O251 Dy46 Dy27 35.5 . . ? 
O226 Dy46 Dy27 36.6 . . ? 
O270 Dy46 Dy27 110.3 . . ? 
O242 Dy46 Dy27 129.8 . . ? 
O199 Dy46 Dy27 145.7 . . ? 
Dy36 Dy46 Dy27 59.5 . . ? 
Dy30 Dy46 Dy27 60.6 . . ? 
O177 Dy46 Dy37 74.9 . . ? 
O52 Dy46 Dy37 101.9 . . ? 
O145 Dy46 Dy37 132.9 . . ? 
O251 Dy46 Dy37 109.6 . . ? 
O226 Dy46 Dy37 155.6 . . ? 
O270 Dy46 Dy37 36.7 . . ? 
O242 Dy46 Dy37 36.0 . . ? 
O199 Dy46 Dy37 70.2 . . ? 
Dy36 Dy46 Dy37 115.6 . . ? 
Dy30 Dy46 Dy37 165.3 . . ? 
Dy27 Dy46 Dy37 132.8 . . ? 
O216 Dy47 O262 72.4 . . ? 
O216 Dy47 O126 102.6 . . ? 
O262 Dy47 O126 146.5 . . ? 
O216 Dy47 O155 147.9 . . ? 
O262 Dy47 O155 127.2 . . ? 
O126 Dy47 O155 74.4 . . ? 
O216 Dy47 O174 140.6 . . ? 
O262 Dy47 O174 71.0 . . ? 
O126 Dy47 O174 99.8 . . ? 
O155 Dy47 O174 69.8 . . ? 
O216 Dy47 O181 81.1 . . ? 
O262 Dy47 O181 69.6 . . ? 
O126 Dy47 O181 77.0 . . ? 
O155 Dy47 O181 127.5 . . ? 
O174 Dy47 O181 73.0 . . ? 
O216 Dy47 O253 85.9 . . ? 
O262 Dy47 O253 74.8 . . ? 
O126 Dy47 O253 138.6 . . ? 
O155 Dy47 O253 77.4 . . ? 
O174 Dy47 O253 98.1 . . ? 
O181 Dy47 O253 144.2 . . ? 
O216 Dy47 O225 68.3 . . ? 
O262 Dy47 O225 129.3 . . ? 
O126 Dy47 O225 74.1 . . ? 
O155 Dy47 O225 80.4 . . ? 
O174 Dy47 O225 150.0 . . ? 
O181 Dy47 O225 131.3 . . ? 
O253 Dy47 O225 71.8 . . ? 
O216 Dy47 Dy4 118.9 . . ? 
O262 Dy47 Dy4 78.1 . . ? 
O126 Dy47 Dy4 75.8 . . ? 
O155 Dy47 Dy4 91.9 . . ? 
O174 Dy47 Dy4 38.6 . . ? 
O181 Dy47 Dy4 38.3 . . ? 
O253 Dy47 Dy4 135.0 . . ? 
O225 Dy47 Dy4 150.0 . . ? 
O216 Dy47 Dy18 62.7 . . ? 
O262 Dy47 Dy18 36.0 . . ? 
O126 Dy47 Dy18 111.6 . . ? 
O155 Dy47 Dy18 148.8 . . ? 
O174 Dy47 Dy18 79.1 . . ? 
O181 Dy47 Dy18 36.7 . . ? 
O253 Dy47 Dy18 108.2 . . ? 
O225 Dy47 Dy18 130.7 . . ? 
Dy4 Dy47 Dy18 62.0 . . ? 
O216 Dy47 Dy49 108.5 . . ? 
O262 Dy47 Dy49 36.1 . . ? 
O126 Dy47 Dy49 134.7 . . ? 
O155 Dy47 Dy49 94.2 . . ? 
O174 Dy47 Dy49 37.1 . . ? 
O181 Dy47 Dy49 76.3 . . ? 
O253 Dy47 Dy49 76.5 . . ? 
O225 Dy47 Dy49 148.3 . . ? 
Dy4 Dy47 Dy49 60.6 . . ? 
Dy18 Dy47 Dy49 59.2 . . ? 
O216 Dy47 Dy48 79.6 . . ? 
O262 Dy47 Dy48 106.6 . . ? 
O126 Dy47 Dy48 104.8 . . ? 
O155 Dy47 Dy48 70.7 . . ? 
O174 Dy47 Dy48 124.9 . . ? 
O181 Dy47 Dy48 160.4 . . ? 
O253 Dy47 Dy48 36.3 . . ? 
O225 Dy47 Dy48 36.2 . . ? 
Dy4 Dy47 Dy48 161.3 . . ? 
Dy18 Dy47 Dy48 131.7 . . ? 
Dy49 Dy47 Dy48 112.5 . . ? 
O122 Dy48 O189 72.8 . . ? 
O122 Dy48 O225 76.5 . . ? 
O189 Dy48 O225 128.2 . . ? 
O122 Dy48 O184 90.1 . . ?
[truncated: 148,978 more chars]
